# Supplementary material for: Design, synthesis, and high-throughput in vitro anti-cancer evaluation of novel 4-aminopyrazolo[3,4-d]pyrimidine derivatives: potential anti-cancer candidates against UO-31 renal cancer cells
Source: Royal Society of Chemistry journal article supplement (doi:10.1039/d4ra05136j), 2024-01-01
Supplement: d4ra05136j1.pdf [file d4ra05136j1.pdf]

## Novel 4-Aminopyrazolo[3,4-d]Pyrimidine Derivatives: Design, Synthesis And High-Throughput In-Vitro Anti-Cancer Evaluation

Amitananda Dash,<sup>a</sup> Guruswamy Vaddamanu,<sup>b</sup> Mohammed Bakr Hawsawi,<sup>c</sup> Mustafa S. Alluhaibi,<sup>c</sup> Pavana Kumari G.,<sup>a</sup> \* Naveen Mulakayala<sup>b</sup> \*

| Compound code | IUPAC name                                                                                                                                                   | Data type                           | Figure Notation |
|---------------|--------------------------------------------------------------------------------------------------------------------------------------------------------------|-------------------------------------|-----------------|
| <b>12a</b>    | 2,2,2-trifluoro-N-(3-(4-phenoxyphenyl)-1-((3R)-1-(1-(2,2,2-trifluoroacetyl)pyrrolidine-2-carbonyl)piperidin-3-yl)-1H-pyrazolo[3,4-d]pyrimidin-4-yl)acetamide | HRMS                                | Figure 1        |
|               |                                                                                                                                                              | <sup>1</sup> H NMR full spectrum    | Figure 2        |
|               |                                                                                                                                                              | <sup>1</sup> H NMR aromatic region  | Figure 3        |
|               |                                                                                                                                                              | <sup>1</sup> H NMR aliphatic region | Figure 4        |
|               |                                                                                                                                                              | <sup>13</sup> C NMR                 | Figure 5        |
|               |                                                                                                                                                              | FT-IR                               | Figure 6        |
| <b>12b</b>    | 4-amino-1-((3R)-1-((4-chloro-2-fluorobenzoyl)prolyl)piperidin-3-yl)-3-(4-phenoxyphenyl)-1H-pyrazolo[3,4-d]pyrimidine                                         | HRMS                                | Figure 7        |
|               |                                                                                                                                                              | <sup>1</sup> H NMR full spectrum    | Figure 8        |
|               |                                                                                                                                                              | <sup>1</sup> H NMR aromatic region  | Figure 9        |
|               |                                                                                                                                                              | <sup>1</sup> H NMR aliphatic region | Figure 10       |
|               |                                                                                                                                                              | <sup>13</sup> C NMR                 | Figure 11       |
| <b>12c</b>    | 4-amino-1-((3R)-1-((4-fluorobenzoyl)prolyl)piperidin-3-yl)-3-(4-phenoxyphenyl)-1H-pyrazolo[3,4-d]pyrimidine                                                  | FT-IR                               | Figure 12       |
|               |                                                                                                                                                              | HRMS                                | Figure 13       |
|               |                                                                                                                                                              | <sup>1</sup> H NMR full spectrum    | Figure 14       |
|               |                                                                                                                                                              | <sup>1</sup> H NMR aromatic region  | Figure 15       |
|               |                                                                                                                                                              | <sup>1</sup> H NMR aliphatic region | Figure 16       |
| <b>12d</b>    | 4-amino-1-((3R)-1-((4-fluorobenzoyl)prolyl)piperidin-3-yl)-3-(4-phenoxyphenyl)-1H-pyrazolo[3,4-d]pyrimidine                                                  | <sup>13</sup> C NMR                 | Figure 17       |
|               |                                                                                                                                                              | FT-IR                               | Figure 18       |
|               |                                                                                                                                                              | HRMS                                | Figure 19       |
|               |                                                                                                                                                              | <sup>1</sup> H NMR full spectrum    | Figure 20       |
|               |                                                                                                                                                              | <sup>1</sup> H NMR aromatic region  | Figure 21       |
| <b>12e</b>    | 4-amino-3-(4-phenoxyphenyl)-1-((3R)-1-((2,4,5-trifluorobenzoyl)prolyl)piperidin-3-yl)-1H-pyrazolo[3,4-d]pyrimidine                                           | <sup>1</sup> H NMR aliphatic region | Figure 22       |
|               |                                                                                                                                                              | <sup>13</sup> C NMR                 | Figure 23       |
|               |                                                                                                                                                              | FT-IR                               | Figure 24       |
|               |                                                                                                                                                              | HRMS                                | Figure 25       |
|               |                                                                                                                                                              | <sup>1</sup> H NMR full spectrum    | Figure 26       |
| <b>12f</b>    | 4-amino-1-((3R)-1-((4-chloropicolinoyl)prolyl)piperidin-3-yl)-3-(4-phenoxyphenyl)-1H-pyrazolo[3,4-d]pyrimidine                                               | <sup>1</sup> H NMR aromatic region  | Figure 27       |
|               |                                                                                                                                                              | <sup>1</sup> H NMR aliphatic region | Figure 28       |
|               |                                                                                                                                                              | <sup>13</sup> C NMR                 | Figure 29       |
|               |                                                                                                                                                              | FT-IR                               | Figure 30       |
|               |                                                                                                                                                              | HRMS                                | Figure 31       |
| <b>12g</b>    | 4-amino-1-((3R)-1-((2,4-difluorobenzoyl)prolyl)piperidin-3-yl)-3-(4-phenoxyphenyl)-1H-pyrazolo[3,4-d]pyrimidine                                              | <sup>1</sup> H NMR full spectrum    | Figure 32       |
|               |                                                                                                                                                              | <sup>1</sup> H NMR aromatic region  | Figure 33       |
|               |                                                                                                                                                              | <sup>1</sup> H NMR aliphatic region | Figure 34       |
|               |                                                                                                                                                              | <sup>13</sup> C NMR                 | Figure 35       |
|               |                                                                                                                                                              | FT-IR                               | Figure 36       |
| <b>12h</b>    | 4-amino-1-((3R)-1-(benzoylprolyl)piperidin-3-yl)-3-(4-phenoxyphenyl)-1H-pyrazolo[3,4-d]pyrimidine                                                            | HRMS                                | Figure 37       |
|               |                                                                                                                                                              | <sup>1</sup> H NMR full spectrum    | Figure 38       |
|               |                                                                                                                                                              | <sup>1</sup> H NMR aromatic region  | Figure 39       |
|               |                                                                                                                                                              | <sup>1</sup> H NMR aliphatic region | Figure 40       |
|               |                                                                                                                                                              | <sup>13</sup> C NMR                 | Figure 41       |
| <b>12h</b>    | 4-amino-3-(4-phenoxyphenyl)-1-((3R)-1-(picolinoylprolyl)piperidin-3-yl)-1H-pyrazolo[3,4-d]pyrimidine                                                         | FT-IR                               | Figure 42       |
|               |                                                                                                                                                              | HRMS                                | Figure 43       |
|               |                                                                                                                                                              | <sup>1</sup> H NMR full spectrum    | Figure 44       |
|               |                                                                                                                                                              | <sup>1</sup> H NMR aromatic region  | Figure 45       |
|               |                                                                                                                                                              | <sup>1</sup> H NMR aliphatic region | Figure 46       |
| <b>12h</b>    | 4-amino-3-(4-phenoxyphenyl)-1-((3R)-1-(picolinoylprolyl)piperidin-3-yl)-1H-pyrazolo[3,4-d]pyrimidine                                                         | <sup>13</sup> C NMR                 | Figure 47       |
|               |                                                                                                                                                              | FT-IR                               | Figure 48       |

|            |                                                                                                                                             |                                     |            |
|------------|---------------------------------------------------------------------------------------------------------------------------------------------|-------------------------------------|------------|
| <b>12i</b> | 4-amino-1-((3R)-1-((3-methyl-4-nitrobenzoyl)propyl)piperidin-3-yl)-3-(4-phenoxyphenyl)-1H-pyrazolo[3,4-d]pyrimidine                         | HRMS                                | Figure 49  |
|            |                                                                                                                                             | <sup>1</sup> H NMR full spectrum    | Figure 50  |
|            |                                                                                                                                             | <sup>1</sup> H NMR aromatic region  | Figure 51  |
|            |                                                                                                                                             | <sup>1</sup> H NMR aliphatic region | Figure 52  |
|            |                                                                                                                                             | <sup>13</sup> C NMR                 | Figure 53  |
|            |                                                                                                                                             | FT-IR                               | Figure 54  |
| <b>12j</b> | 4-amino-1-((3R)-1-((4-chlorobenzoyl)propyl)piperidin-3-yl)-3-(4-phenoxyphenyl)-1H-pyrazolo[3,4-d]pyrimidine                                 | HRMS                                | Figure 55  |
|            |                                                                                                                                             | <sup>1</sup> H NMR full spectrum    | Figure 56  |
|            |                                                                                                                                             | <sup>1</sup> H NMR aromatic region  | Figure 57  |
|            |                                                                                                                                             | <sup>1</sup> H NMR aliphatic region | Figure 58  |
|            |                                                                                                                                             | <sup>13</sup> C NMR                 | Figure 59  |
|            |                                                                                                                                             | FT-IR                               | Figure 60  |
| <b>12k</b> | 4-amino-1-((3R)-1-((3-nitrobenzoyl)propyl)piperidin-3-yl)-3-(4-phenoxyphenyl)-1H-pyrazolo[3,4-d]pyrimidine                                  | HRMS                                | Figure 61  |
|            |                                                                                                                                             | <sup>1</sup> H NMR full spectrum    | Figure 62  |
|            |                                                                                                                                             | <sup>1</sup> H NMR aromatic region  | Figure 63  |
|            |                                                                                                                                             | <sup>1</sup> H NMR aliphatic region | Figure 64  |
|            |                                                                                                                                             | <sup>13</sup> C NMR                 | Figure 65  |
|            |                                                                                                                                             | FT-IR                               | Figure 66  |
| <b>12l</b> | 4-(2-((R)-3-(4-amino-3-(4-phenoxyphenyl)-1H-pyrazolo[3,4-d]pyrimidin-1-yl)piperidine-1-carbonyl)pyrrolidine-1-carbonyl)phenyl acetate       | HRMS                                | Figure 67  |
|            |                                                                                                                                             | <sup>1</sup> H NMR full spectrum    | Figure 68  |
|            |                                                                                                                                             | <sup>1</sup> H NMR aromatic region  | Figure 69  |
|            |                                                                                                                                             | <sup>1</sup> H NMR aliphatic region | Figure 70  |
|            |                                                                                                                                             | <sup>13</sup> C NMR                 | Figure 71  |
|            |                                                                                                                                             | FT-IR                               | Figure 72  |
| <b>12m</b> | 4-amino-1-((3R)-1-((4-bromo-3-(trifluoromethyl)benzoyl)propyl)piperidin-3-yl)-3-(4-phenoxyphenyl)-1H-pyrazolo[3,4-d]pyrimidine              | HRMS                                | Figure 73  |
|            |                                                                                                                                             | <sup>1</sup> H NMR full spectrum    | Figure 74  |
|            |                                                                                                                                             | <sup>1</sup> H NMR aromatic region  | Figure 75  |
|            |                                                                                                                                             | <sup>1</sup> H NMR aliphatic region | Figure 76  |
|            |                                                                                                                                             | <sup>13</sup> C NMR                 | Figure 77  |
|            |                                                                                                                                             | FT-IR                               | Figure 78  |
| <b>12n</b> | 1-(2-((R)-3-(4-amino-3-(4-phenoxyphenyl)-1H-pyrazolo[3,4-d]pyrimidin-1-yl)piperidine-1-carbonyl)pyrrolidin-1-yl)-2-(4-fluorophenyl)ethanone | ESI-MS                              | Figure 79  |
|            |                                                                                                                                             | <sup>1</sup> H NMR full spectrum    | Figure 80  |
|            |                                                                                                                                             | <sup>1</sup> H NMR aromatic region  | Figure 81  |
|            |                                                                                                                                             | <sup>1</sup> H NMR aliphatic region | Figure 82  |
|            |                                                                                                                                             | <sup>13</sup> C NMR                 | Figure 83  |
|            |                                                                                                                                             | FT-IR                               | Figure 84  |
| <b>12o</b> | 4-amino-1-((3R)-1-((3-methylbenzoyl)propyl)piperidin-3-yl)-3-(4-phenoxyphenyl)-1H-pyrazolo[3,4-d]pyrimidine                                 | HRMS                                | Figure 85  |
|            |                                                                                                                                             | <sup>1</sup> H NMR full spectrum    | Figure 86  |
|            |                                                                                                                                             | <sup>1</sup> H NMR aromatic region  | Figure 87  |
|            |                                                                                                                                             | <sup>1</sup> H NMR aliphatic region | Figure 88  |
|            |                                                                                                                                             | <sup>13</sup> C NMR                 | Figure 89  |
|            |                                                                                                                                             | FT-IR                               | Figure 90  |
| <b>12p</b> | 4-amino-1-((3R)-1-((5-chlorothiophene-2-carbonyl)propyl)piperidin-3-yl)-3-(4-phenoxyphenyl)-1H-pyrazolo[3,4-d]pyrimidine                    | HRMS                                | Figure 91  |
|            |                                                                                                                                             | <sup>1</sup> H NMR full spectrum    | Figure 92  |
|            |                                                                                                                                             | <sup>1</sup> H NMR aromatic region  | Figure 93  |
|            |                                                                                                                                             | <sup>1</sup> H NMR aliphatic region | Figure 94  |
|            |                                                                                                                                             | <sup>13</sup> C NMR                 | Figure 95  |
|            |                                                                                                                                             | FT-IR                               | Figure 96  |
| <b>12q</b> | 4-amino-1-((3R)-1-((4-methoxybenzoyl)propyl)piperidin-3-yl)-3-(4-phenoxyphenyl)-1H-pyrazolo[3,4-d]pyrimidine                                | HRMS                                | Figure 97  |
|            |                                                                                                                                             | <sup>1</sup> H NMR full spectrum    | Figure 98  |
|            |                                                                                                                                             | <sup>1</sup> H NMR aromatic region  | Figure 99  |
|            |                                                                                                                                             | <sup>1</sup> H NMR aliphatic region | Figure 100 |
|            |                                                                                                                                             | <sup>13</sup> C NMR                 | Figure 101 |
|            |                                                                                                                                             | FT-IR                               | Figure 102 |
| <b>12r</b> | 7-amino-3-((3R)-1-((3-                                                                                                                      | HRMS                                | Figure 103 |

|            |                                                                                                                                                                                                                    |                                     |            |
|------------|--------------------------------------------------------------------------------------------------------------------------------------------------------------------------------------------------------------------|-------------------------------------|------------|
|            | chlorobenzoyl)prolyl)piperidin-3-yl)-1-(4-phenoxyphenyl)-1H-pyrazolo[4,3-d]pyrimidine                                                                                                                              | <sup>1</sup> H NMR full spectrum    | Figure 104 |
|            |                                                                                                                                                                                                                    | <sup>1</sup> H NMR aromatic region  | Figure 105 |
|            |                                                                                                                                                                                                                    | <sup>1</sup> H NMR aliphatic region | Figure 106 |
|            |                                                                                                                                                                                                                    | <sup>13</sup> C NMR                 | Figure 107 |
|            |                                                                                                                                                                                                                    | FT-IR                               | Figure 108 |
| <b>12s</b> | 7-amino-3-((3R)-1-((4-nitrobenzoyl)prolyl)piperidin-3-yl)-1-(4-phenoxyphenyl)-1H-pyrazolo[4,3-d]pyrimidine                                                                                                         | HRMS                                | Figure 109 |
|            |                                                                                                                                                                                                                    | <sup>1</sup> H NMR full spectrum    | Figure 110 |
|            |                                                                                                                                                                                                                    | <sup>1</sup> H NMR aromatic region  | Figure 111 |
|            |                                                                                                                                                                                                                    | <sup>1</sup> H NMR aliphatic region | Figure 112 |
|            |                                                                                                                                                                                                                    | <sup>13</sup> C NMR                 | Figure 113 |
|            |                                                                                                                                                                                                                    | FT-IR                               | Figure 114 |
|            |                                                                                                                                                                                                                    | ESI-MS                              | Figure 115 |
|            |                                                                                                                                                                                                                    | <sup>1</sup> H NMR full spectrum    | Figure 116 |
|            |                                                                                                                                                                                                                    | <sup>1</sup> H NMR aromatic region  | Figure 117 |
|            |                                                                                                                                                                                                                    | <sup>1</sup> H NMR aliphatic region | Figure 118 |
| <b>12t</b> | ((R)-3-(7-amino-1-(4-phenoxyphenyl)-1H-pyrazolo[4,3-d]pyrimidin-3-yl)piperidin-1-yl)(1-(5-((6-chloro-2-methylpyrimidin-4-yl)amino)thiazole-2-carbonyl)pyrrolidin-2-yl)methanone                                    | <sup>13</sup> C NMR                 | Figure 119 |
|            |                                                                                                                                                                                                                    | FT-IR                               | Figure 120 |
|            |                                                                                                                                                                                                                    | ESI-MS                              | Figure 121 |
|            |                                                                                                                                                                                                                    | <sup>1</sup> H NMR full spectrum    | Figure 122 |
|            |                                                                                                                                                                                                                    | <sup>1</sup> H NMR aromatic region  | Figure 123 |
| <b>11</b>  | ((S)-3-(4-amino-3-(3-phenoxyphenyl)-1H-pyrazolo[3,4-d]pyrimidin-1-yl)piperidin-1-yl)(pyrrolidin-3-yl)methanone                                                                                                     | <sup>1</sup> H NMR aliphatic region | Figure 124 |
|            |                                                                                                                                                                                                                    | <sup>13</sup> C NMR                 | Figure 125 |
|            |                                                                                                                                                                                                                    | FT-IR                               | Figure 126 |
|            |                                                                                                                                                                                                                    | ESI-MS                              | Figure 127 |
|            |                                                                                                                                                                                                                    | <sup>1</sup> H NMR full spectrum    | Figure 128 |
| <b>10</b>  | tert-butyl 3-((S)-3-(4-amino-3-(3-phenoxyphenyl)-1H-pyrazolo[3,4-d]pyrimidin-1-yl)piperidine-1-carbonyl)pyrrolidine-1-carboxylate                                                                                  | <sup>1</sup> H NMR aromatic region  | Figure 129 |
|            |                                                                                                                                                                                                                    | <sup>1</sup> H NMR aliphatic region | Figure 130 |
|            |                                                                                                                                                                                                                    | <sup>13</sup> C NMR                 | Figure 131 |
|            |                                                                                                                                                                                                                    | FT-IR                               | Figure 132 |
|            |                                                                                                                                                                                                                    | ESI-MS                              | Figure 133 |
| <b>8</b>   | (S)-3-(3-phenoxyphenyl)-1-(piperidin-3-yl)-1H-pyrazolo[3,4-d]pyrimidin-4-amine                                                                                                                                     | <sup>1</sup> H NMR full spectrum    | Figure 134 |
|            |                                                                                                                                                                                                                    | <sup>1</sup> H NMR aromatic region  | Figure 135 |
|            |                                                                                                                                                                                                                    | <sup>1</sup> H NMR aliphatic region | Figure 136 |
|            |                                                                                                                                                                                                                    | <sup>13</sup> C NMR                 | Figure 137 |
|            |                                                                                                                                                                                                                    | FT-IR                               | Figure 138 |
| <b>12c</b> | Dose-response curves in individual cell lines<br>Dose-response curves in all cell lines<br>In-vitro five dose testing results<br>IC <sub>50</sub> values depicted in the waterfall graph                           | <i>In-vitro</i> study data          | Figure 139 |
|            |                                                                                                                                                                                                                    |                                     | Figure 140 |
|            |                                                                                                                                                                                                                    |                                     | Figure 141 |
|            |                                                                                                                                                                                                                    |                                     | Figure 142 |
| <b>12d</b> | Single dose mean graph<br>Dose-response curves in individual cell lines<br>Dose-response curves in all cell lines<br>In-vitro five dose testing results<br>IC <sub>50</sub> values depicted in the waterfall graph | <i>In-vitro</i> study data          | Figure 143 |
|            |                                                                                                                                                                                                                    |                                     | Figure 144 |
|            |                                                                                                                                                                                                                    |                                     | Figure 145 |
|            |                                                                                                                                                                                                                    |                                     | Figure 146 |
|            |                                                                                                                                                                                                                    |                                     | Figure 147 |
| <b>12f</b> | Single dose mean graph<br>Dose-response curves in individual cell lines<br>Dose-response curves in all cell lines<br>In-vitro five dose testing results<br>IC <sub>50</sub> values depicted in the waterfall graph | <i>In-vitro</i> study data          | Figure 148 |
|            |                                                                                                                                                                                                                    |                                     | Figure 149 |
|            |                                                                                                                                                                                                                    |                                     | Figure 150 |
|            |                                                                                                                                                                                                                    |                                     | Figure 151 |
|            |                                                                                                                                                                                                                    |                                     | Figure 152 |
| <b>12j</b> | Single dose mean graph<br>Dose-response curves in individual cell                                                                                                                                                  | <i>In-vitro</i> study data          | Figure 153 |
|            |                                                                                                                                                                                                                    |                                     | Figure 154 |
|            |                                                                                                                                                                                                                    |                                     | Figure 155 |

|           |                                                         |                            |            |
|-----------|---------------------------------------------------------|----------------------------|------------|
|           | lines                                                   |                            |            |
|           | Dose-response curves in all cell lines                  |                            | Figure 156 |
|           | In-vitro five dose testing results                      |                            | Figure 157 |
|           | IC <sub>50</sub> values depicted in the waterfall graph |                            | Figure 158 |
| <b>11</b> | Single dose mean graph                                  | <i>In-vitro</i> study data | Figure 159 |
|           | Dose-response curves in individual cell lines           |                            | Figure 160 |
|           | Dose-response curves in all cell lines                  |                            | Figure 161 |
|           | In-vitro five dose testing results                      |                            | Figure 162 |
|           | IC <sub>50</sub> values depicted in the waterfall graph |                            | Figure 163 |

Spectral data of **2,2,2-trifluoro-N-(3-(4-phenoxyphenyl)-1-((3R)-1-(1-(2,2,2-trifluoroacetyl)pyrrolidine-2-carbonyl)piperidin-3-yl)-1H-pyrazolo[3,4-d]pyrimidin-4-yl)acetamide (12a)**

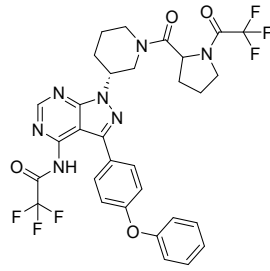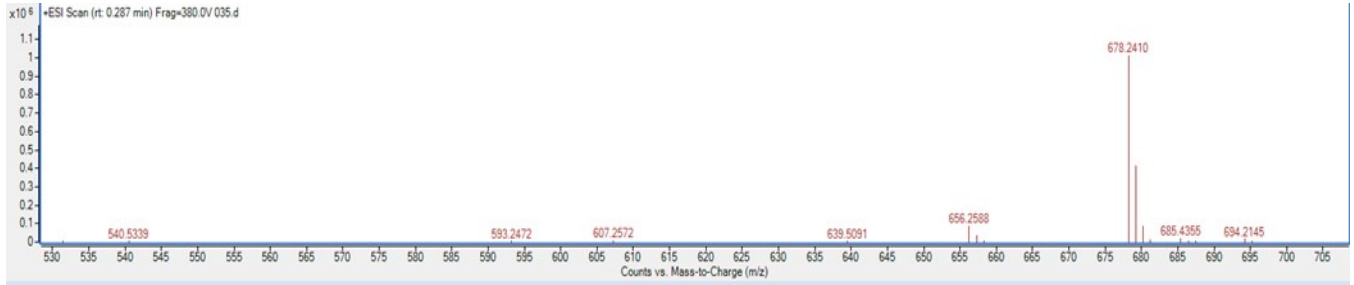

Figure 1. HRMS spectrum of **12a**

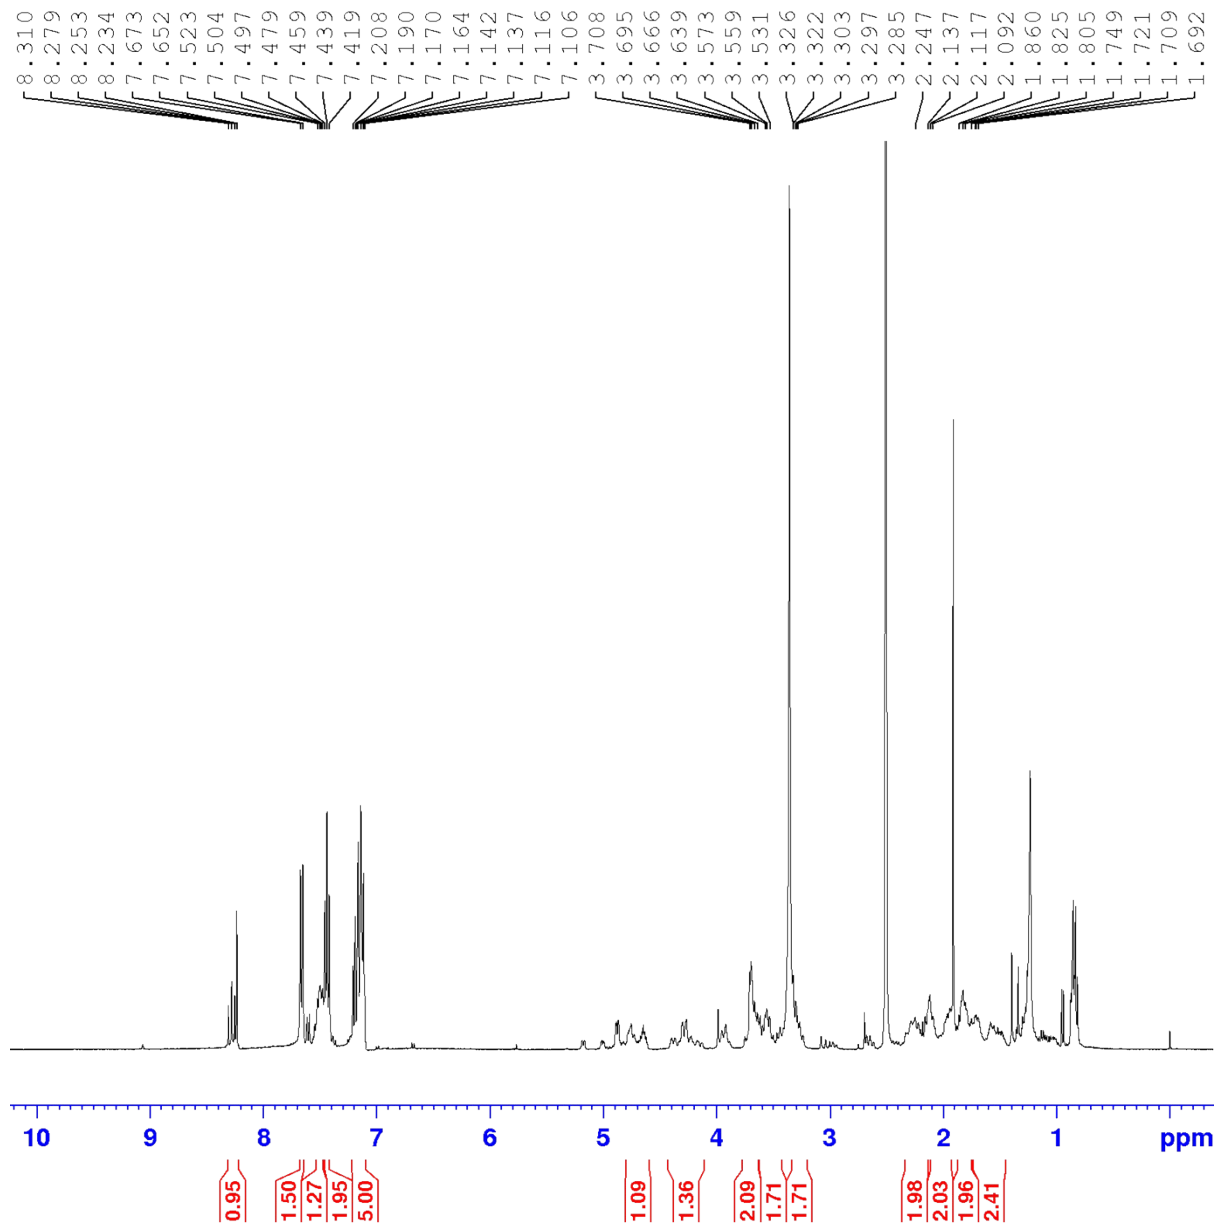

Figure 2.  $^1\text{H}$  NMR full spectrum of **12a**

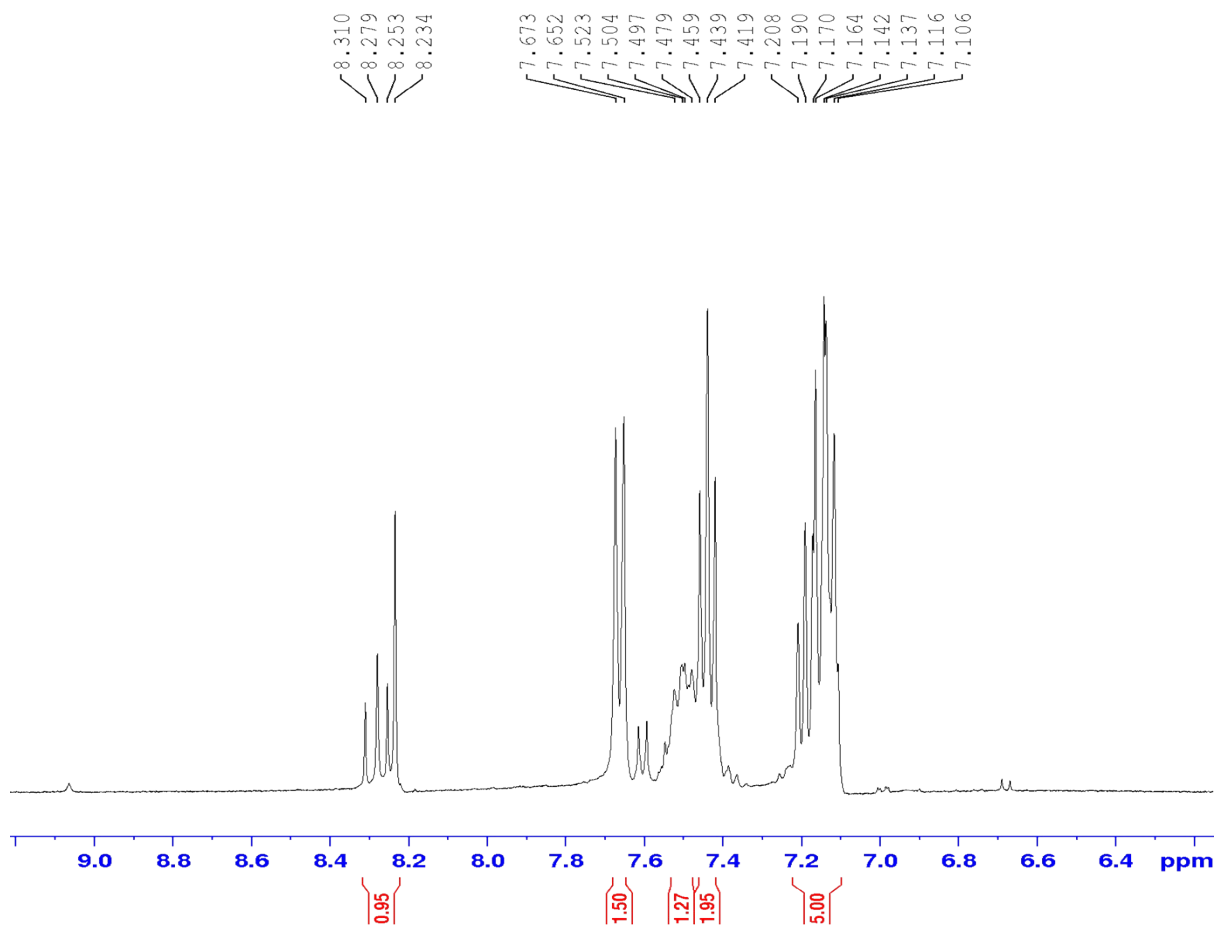

Figure 3. Aromatic region of the  $^1\text{H}$  NMR spectrum for **12a**

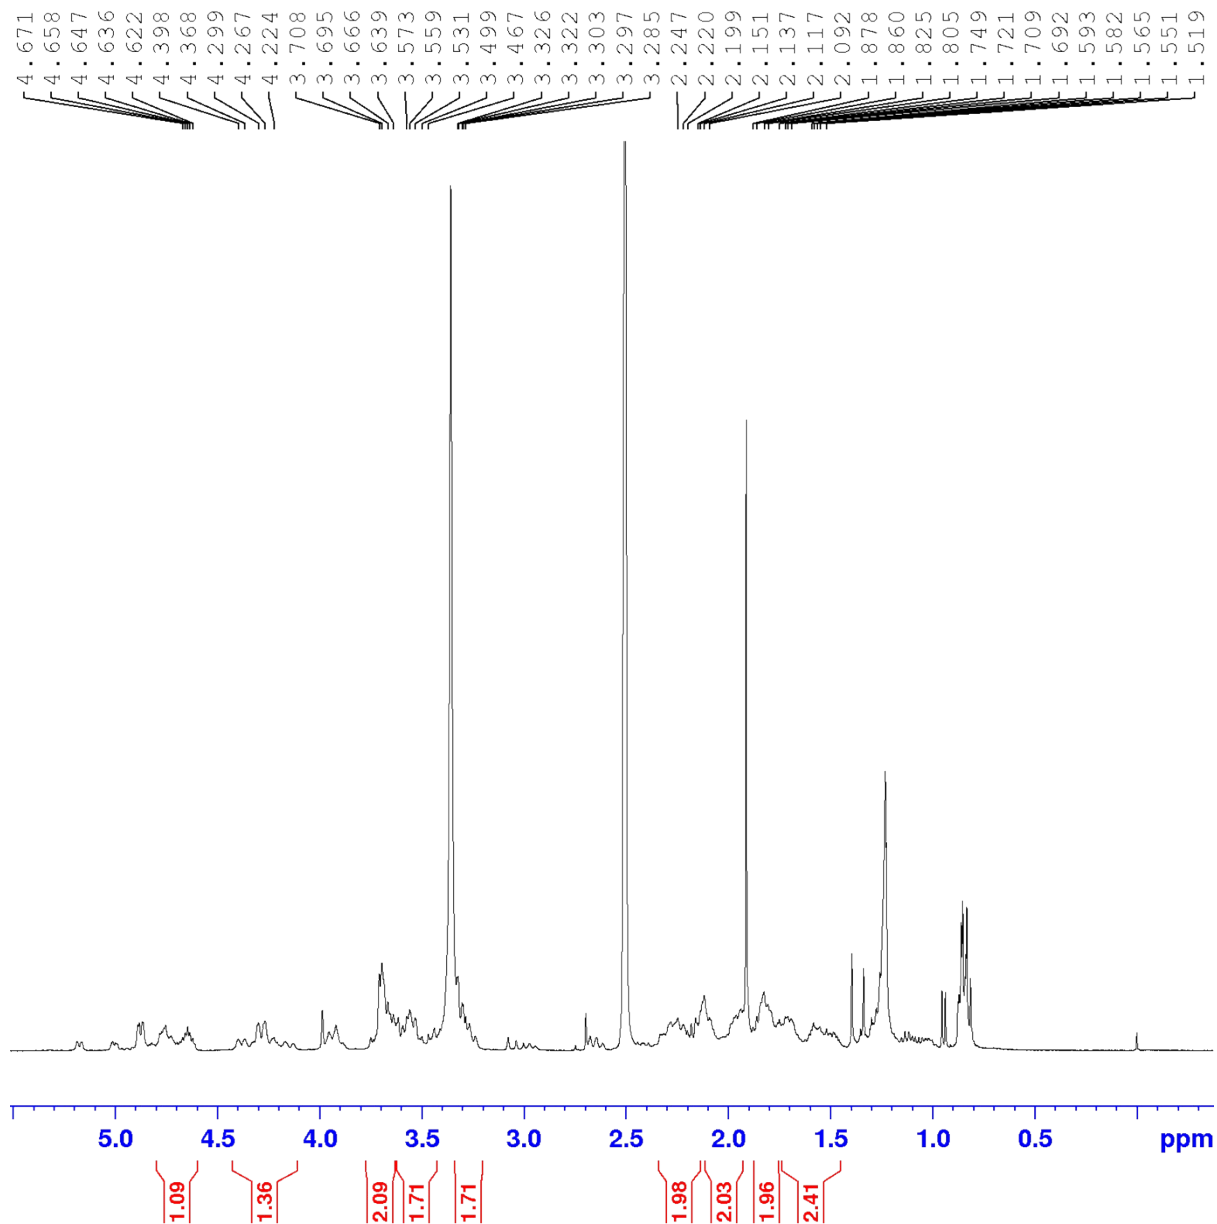

Figure 4. Aliphatic region of the  $^1\text{H}$  NMR spectrum for **12a**

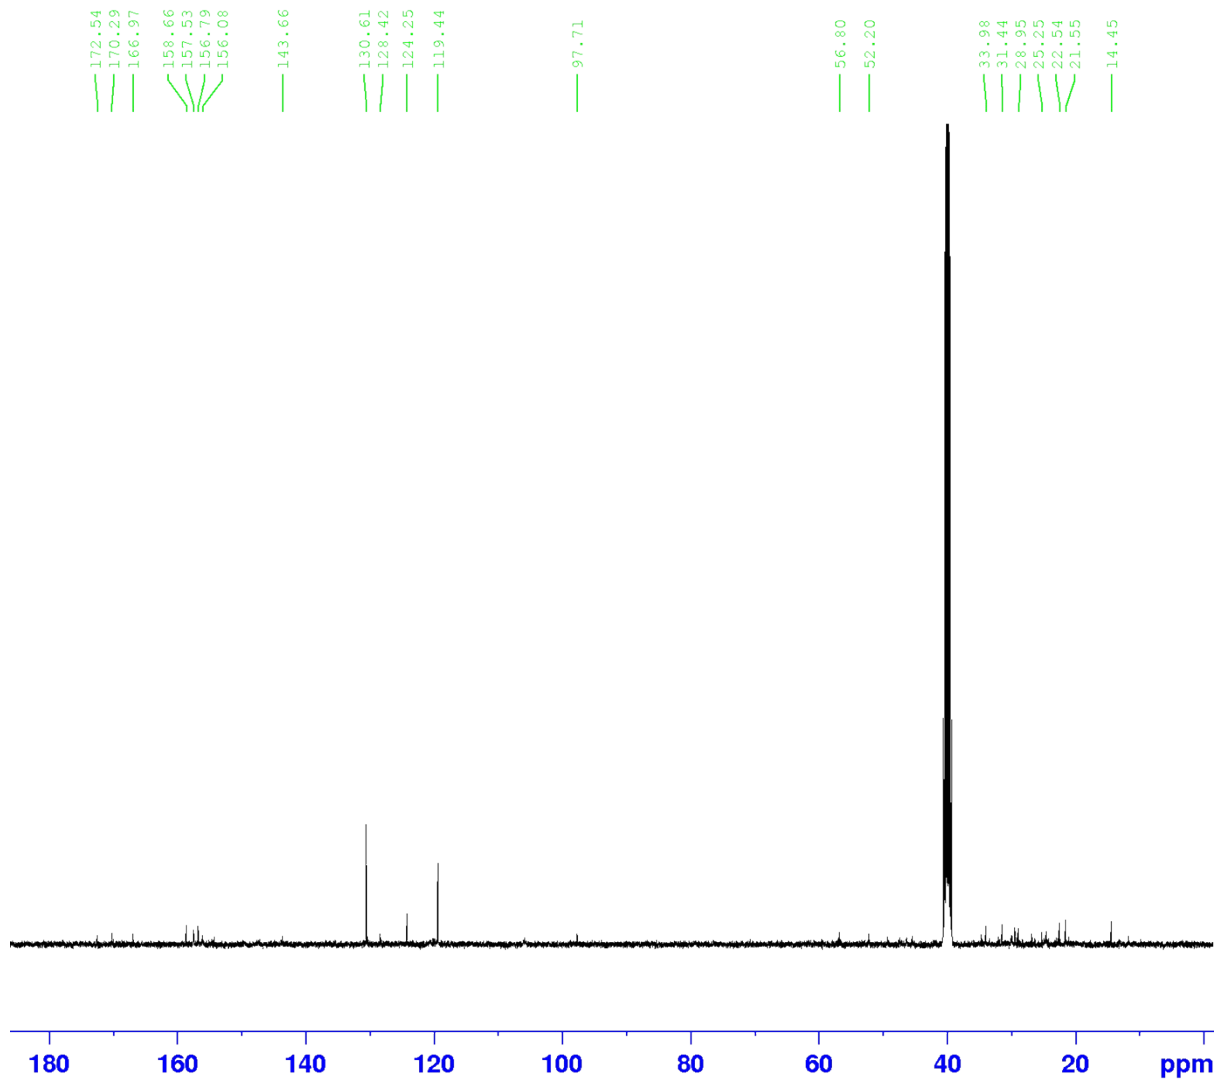

Figure 5.  $^{13}\text{C}$ -NMR spectrum of **12a**

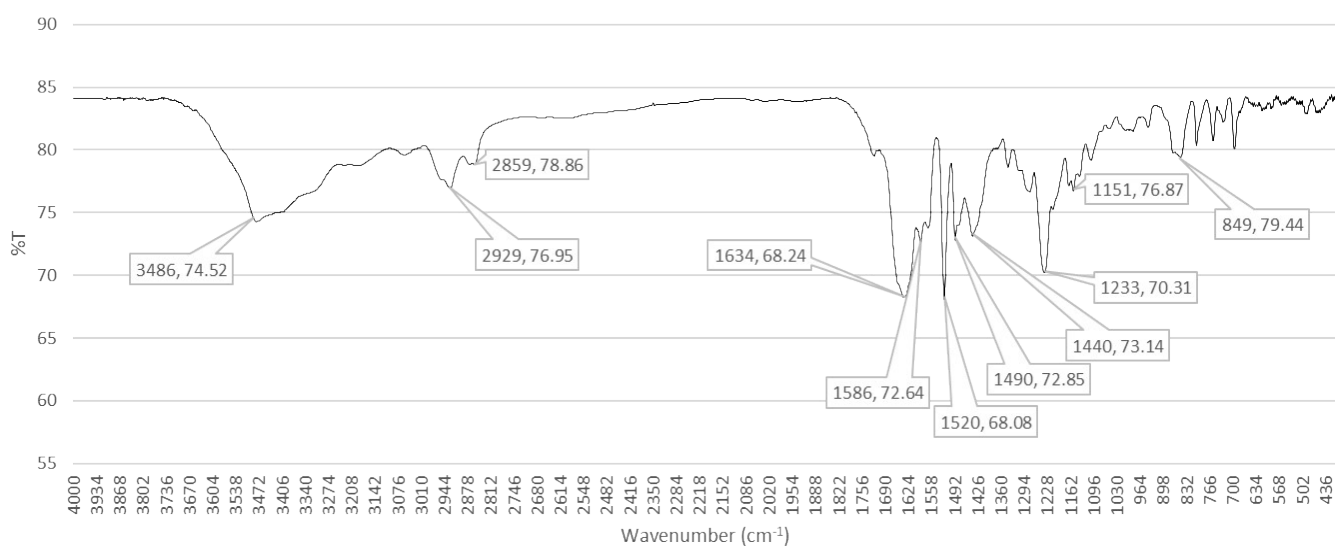

Figure 6. FT-IR spectrum of **12a**

Spectral data of *4-amino-1-((3R)-1-((4-chloro-2-fluorobenzoyl)propyl)piperidin-3-yl)-3-(4-phenoxyphenyl)-1H-pyrazolo[3,4-d]pyrimidine (12b)*



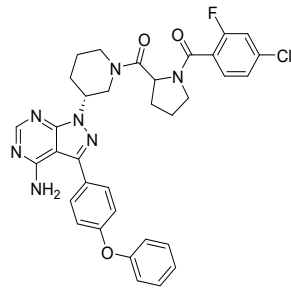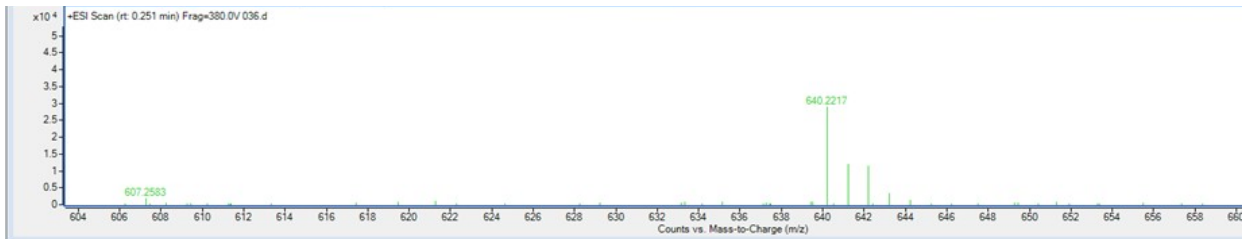

Figure 7. HRMS spectrum of **12b**

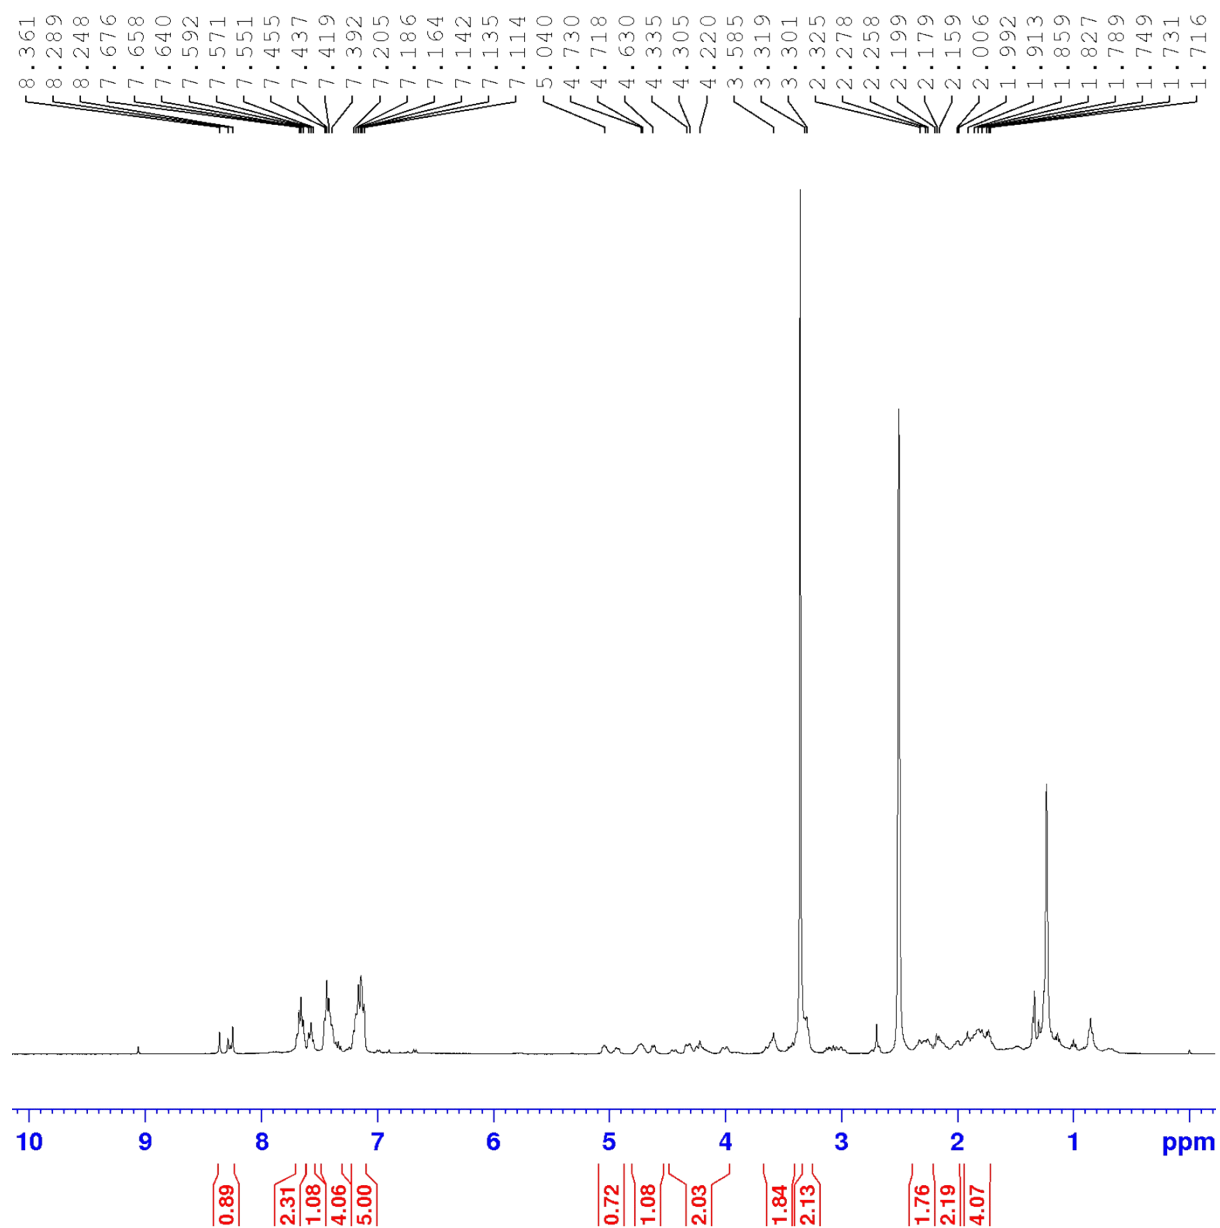

Figure 8.  $^1\text{H}$  NMR full spectrum of **12b**

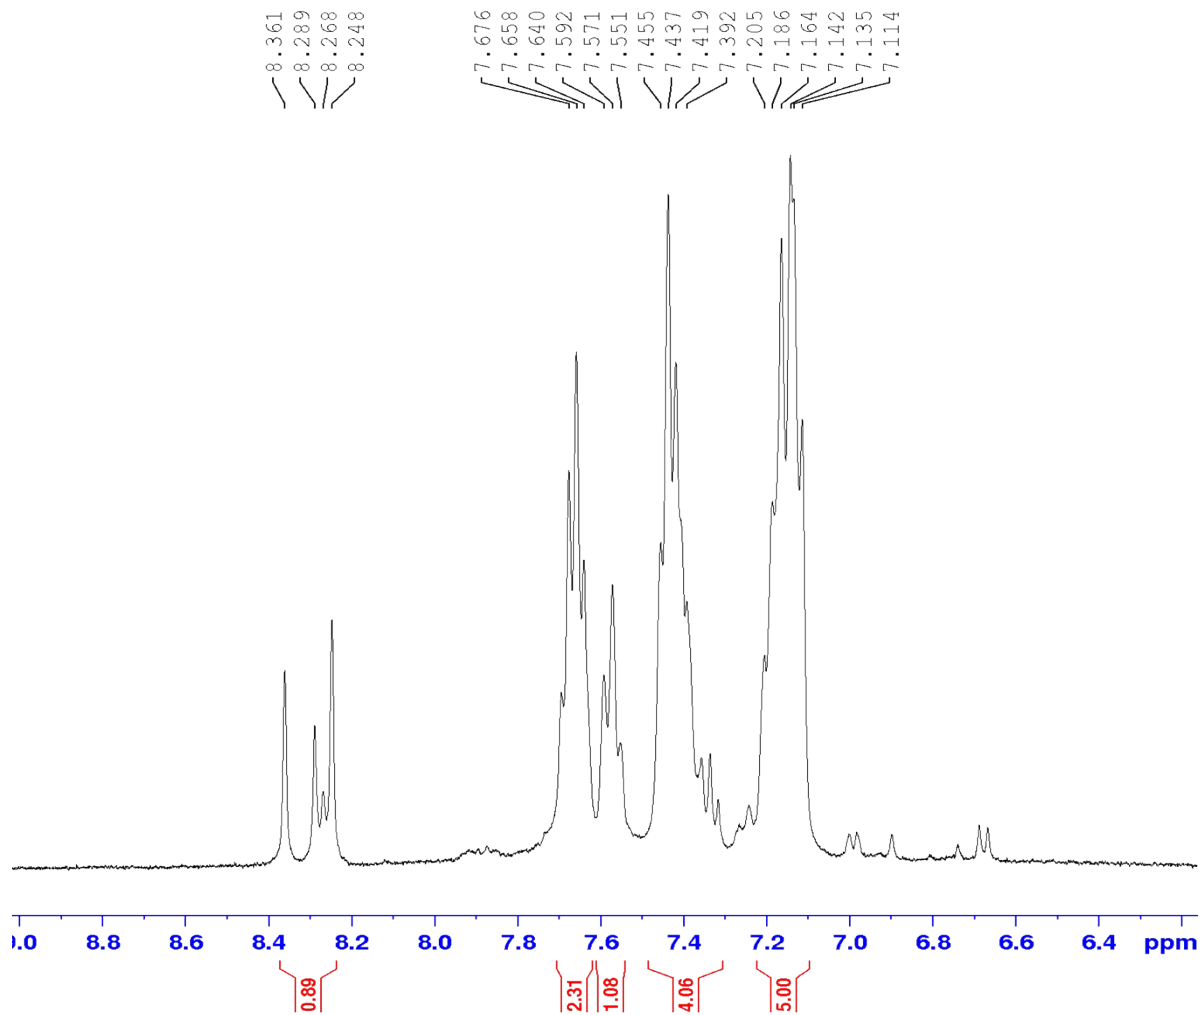

Figure 9. Aromatic region of the  $^1\text{H}$  NMR spectrum for **12b**

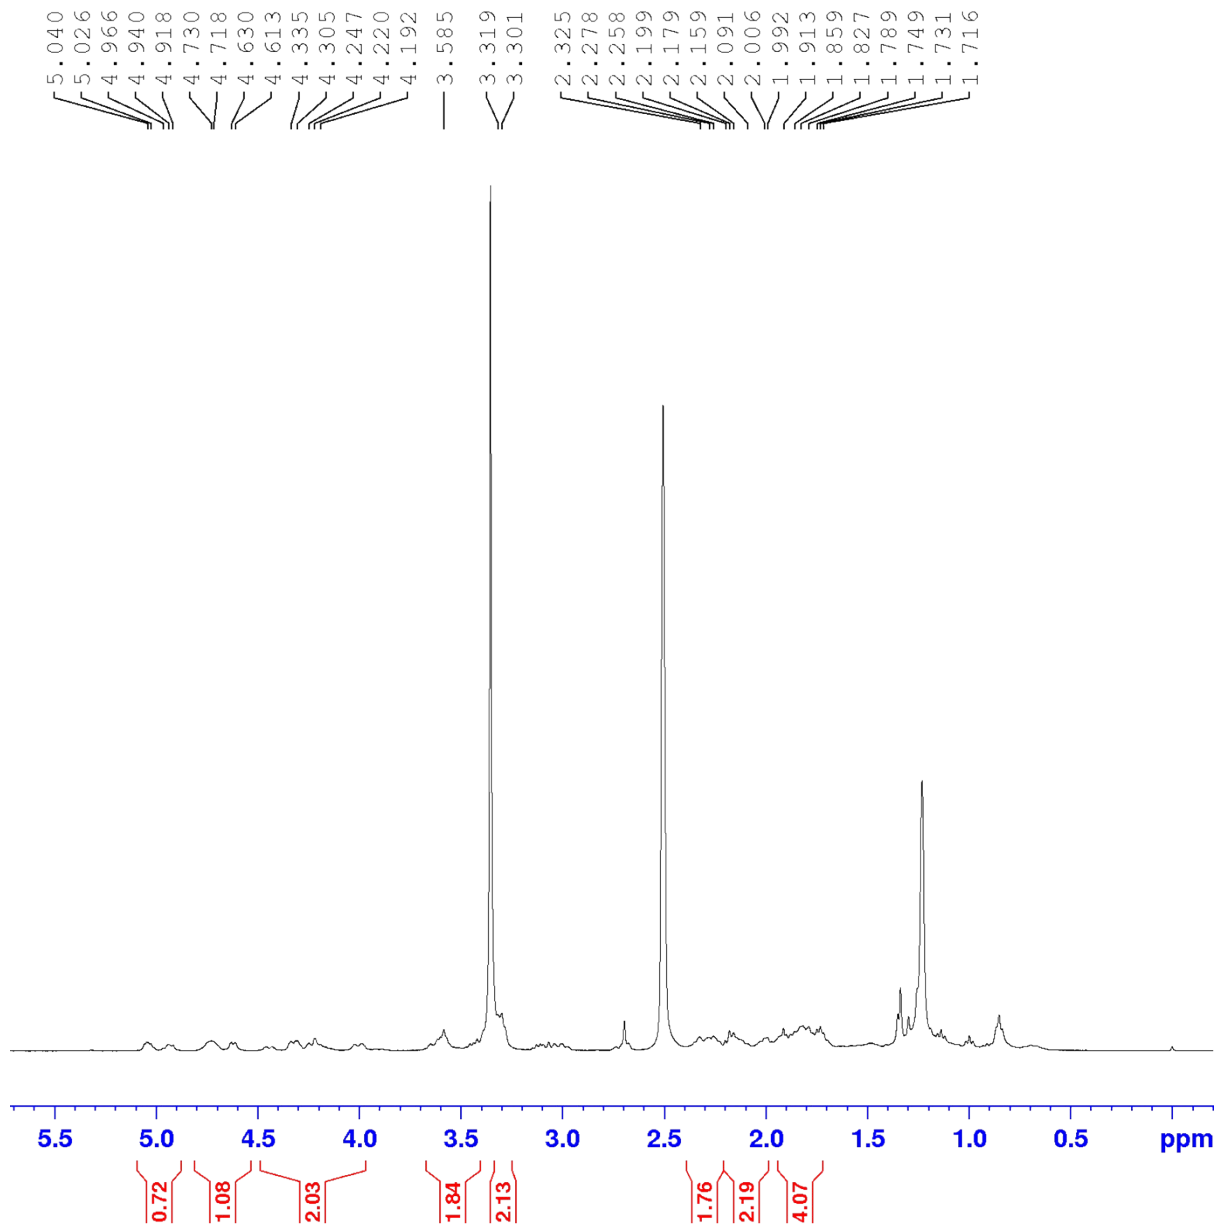

Figure 10. Aliphatic region of the  $^1\text{H}$  NMR spectrum for **12b**

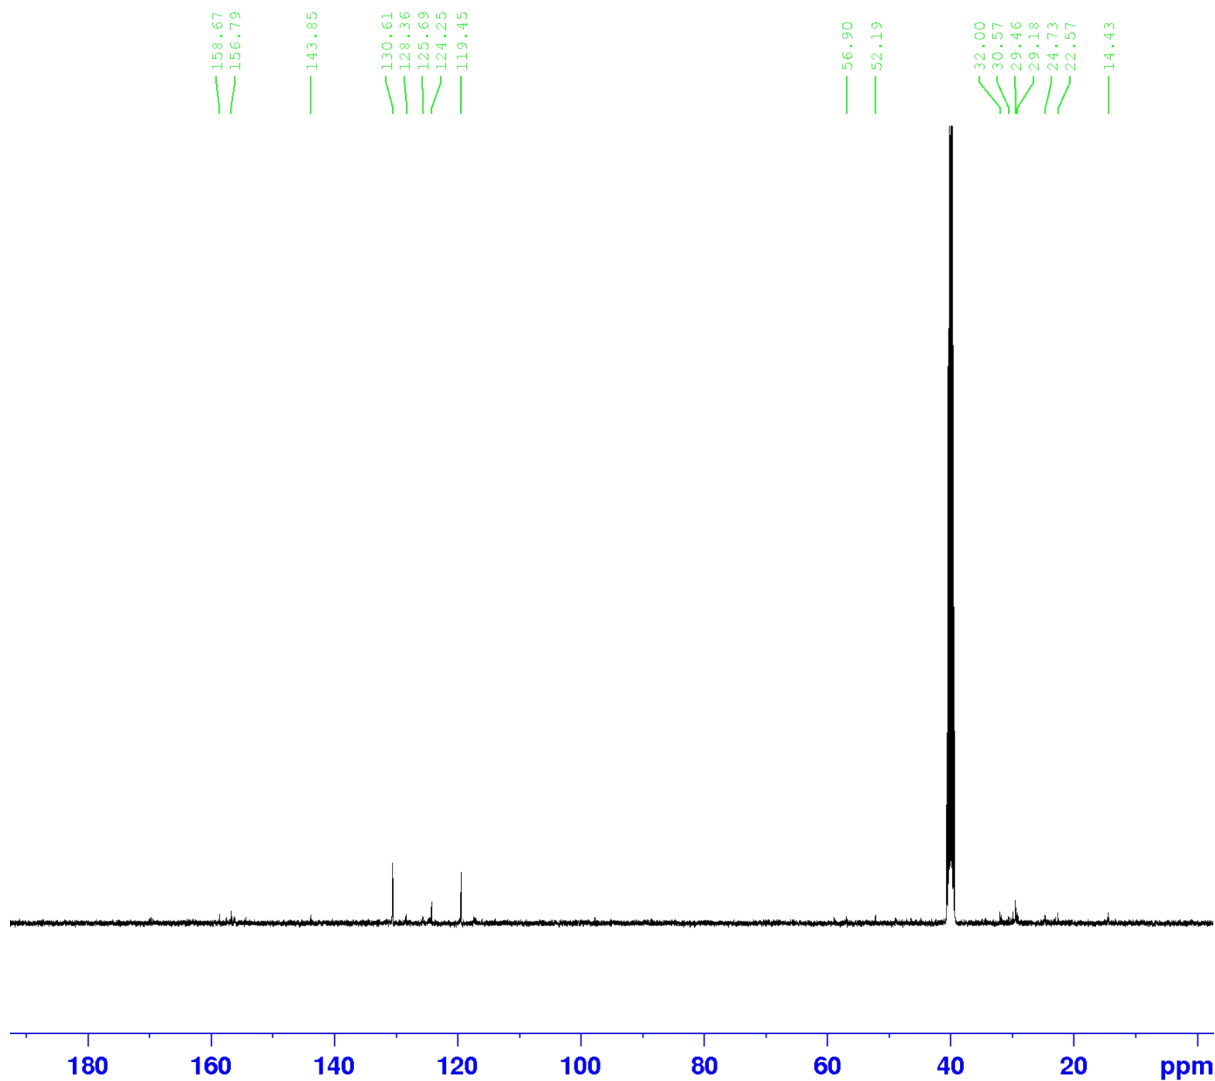

Figure 11.  $^{13}\text{C}$ -NMR spectrum of **12b**

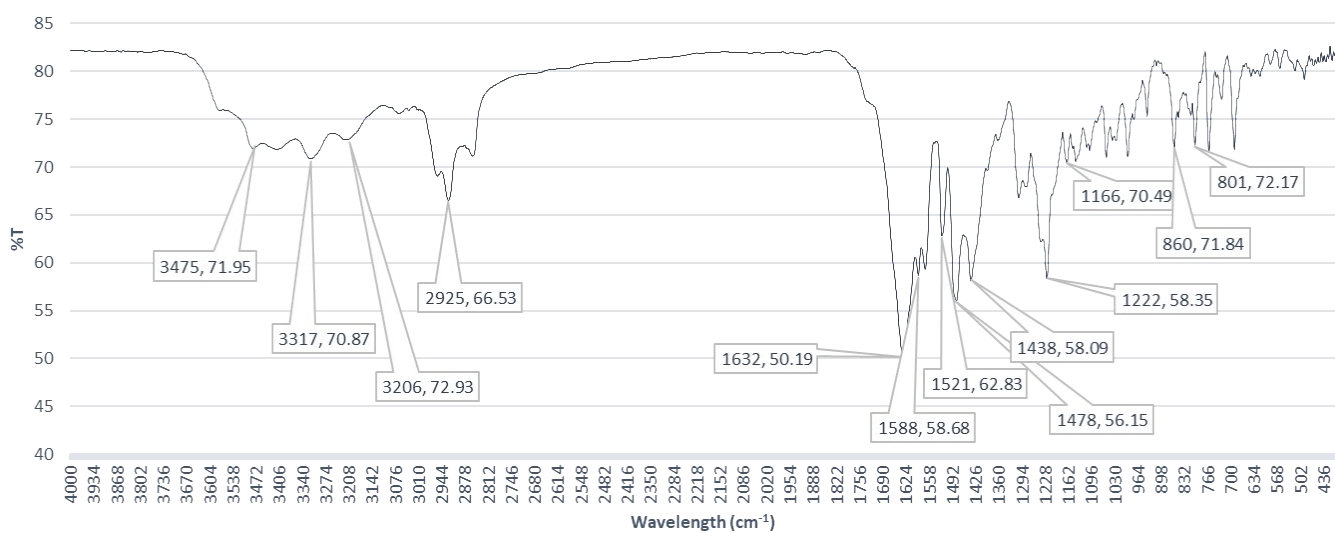

Figure 12. FT-IR spectrum of **12b**

Spectral data of *4-amino-1-((3R)-1-((4-fluorobenzoyl)propyl)piperidin-3-yl)-3-(4-phenoxyphenyl)-1H-pyrazolo[3,4-d]pyrimidine (12c)*

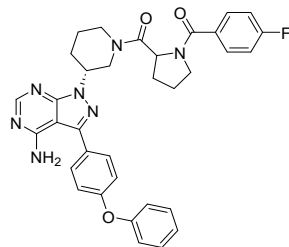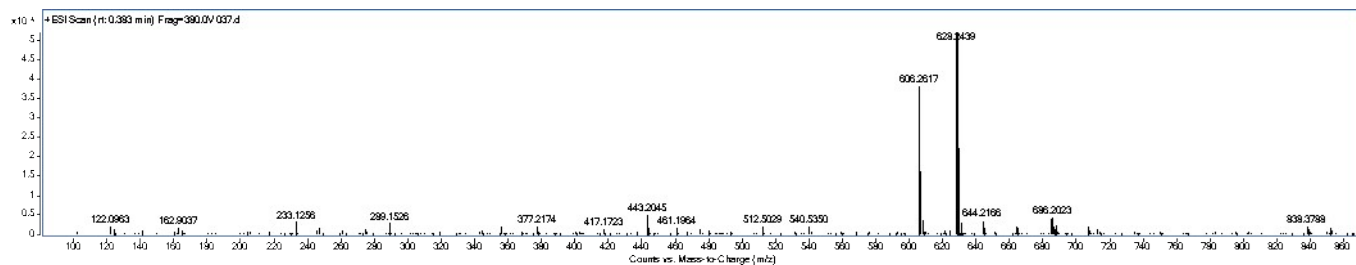

Figure 13. HRMS spectrum of **12c**

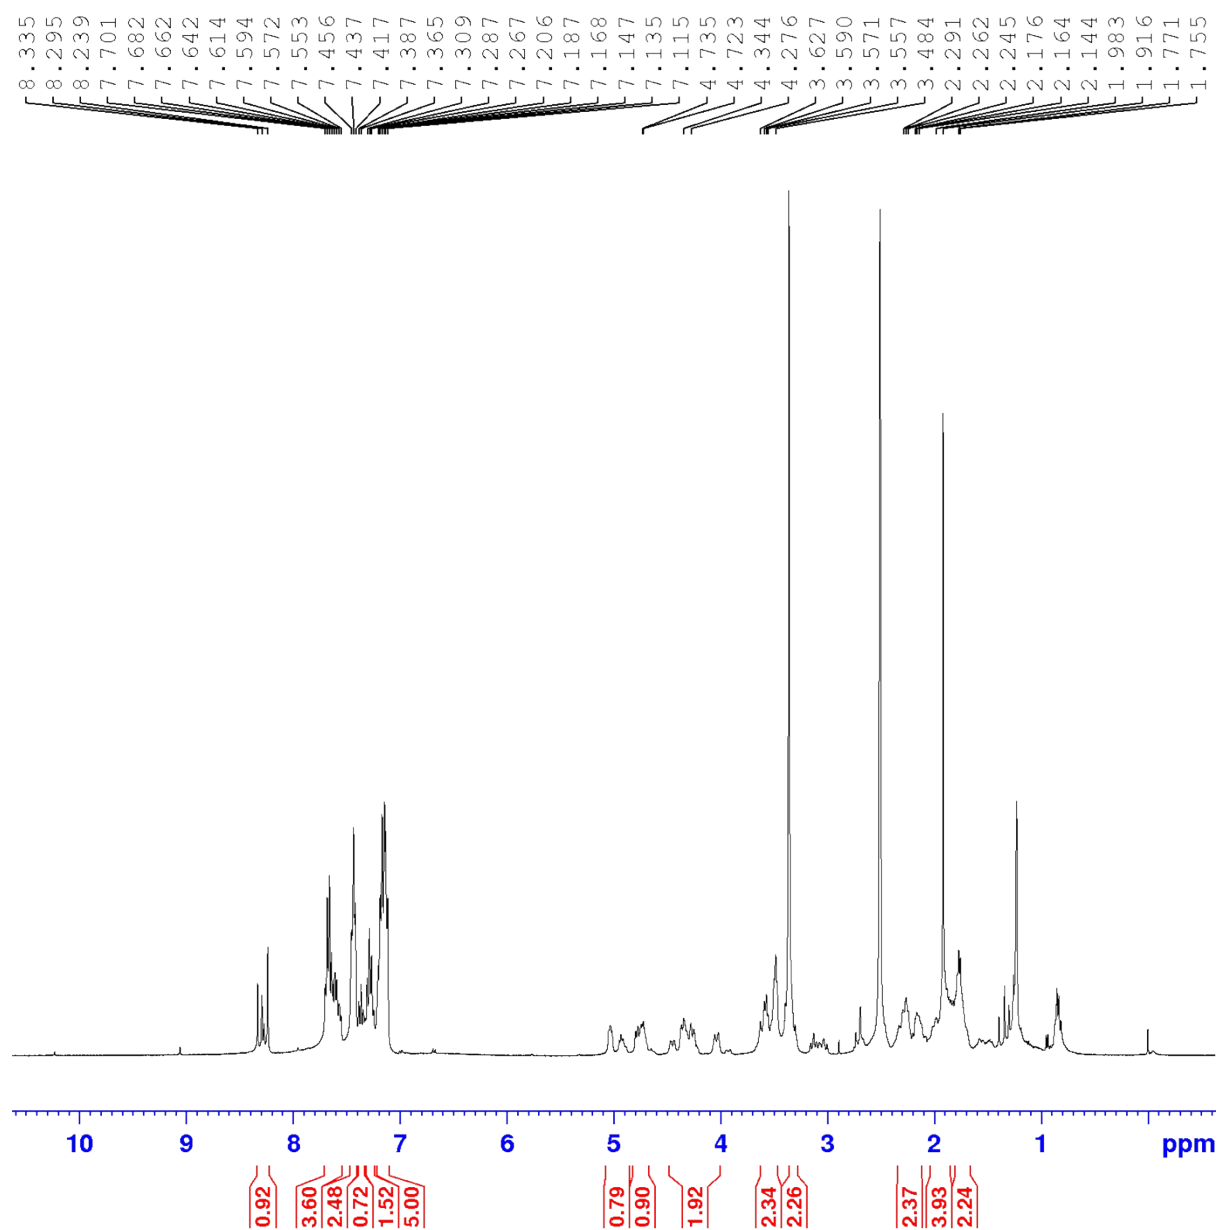

Figure 14.  $^1\text{H}$  NMR full spectrum of **12c**

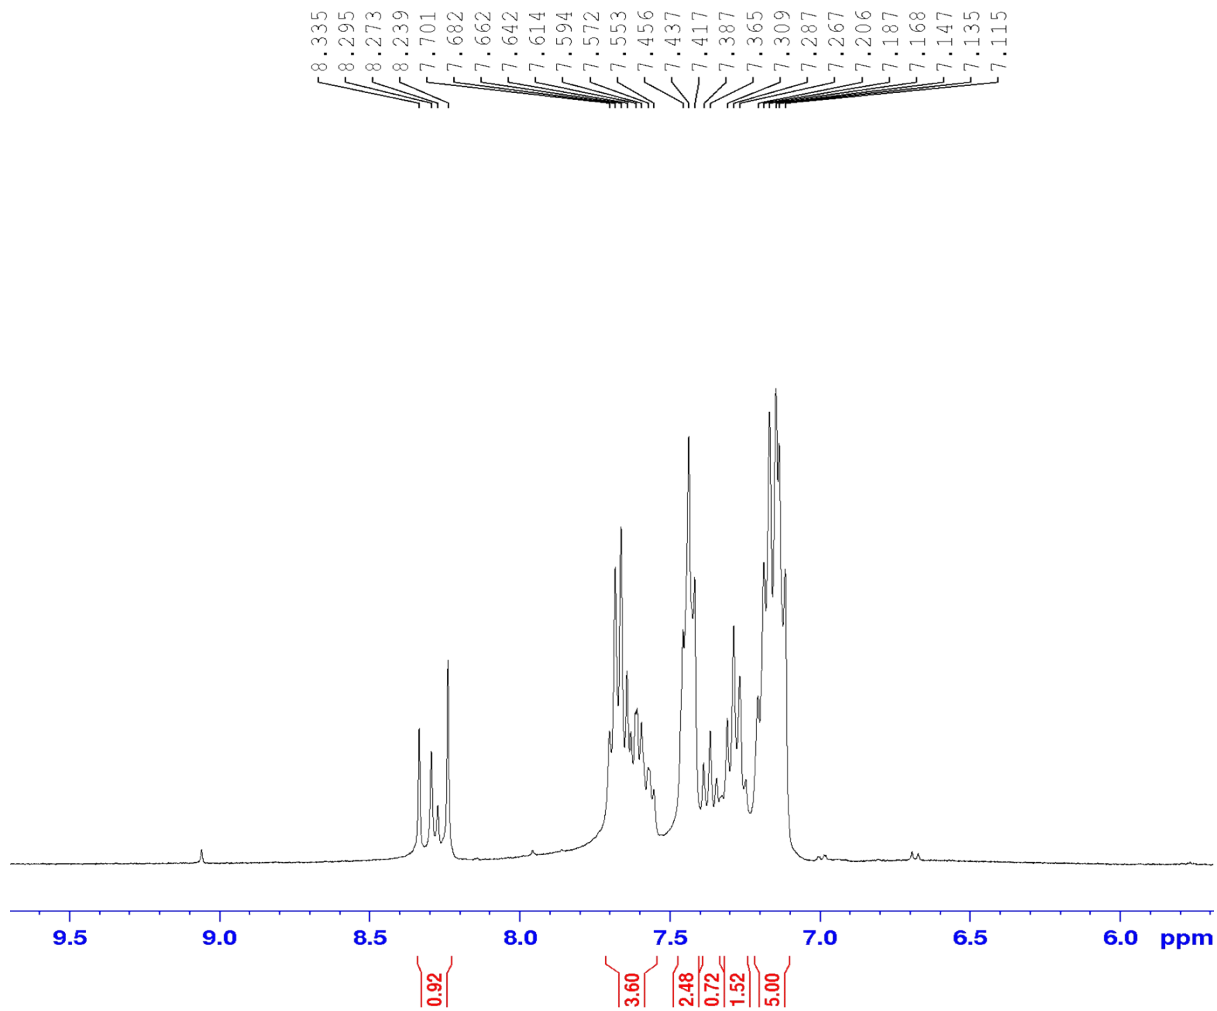

Figure 15. Aromatic region of the  $^1\text{H}$  NMR spectrum for **12c**

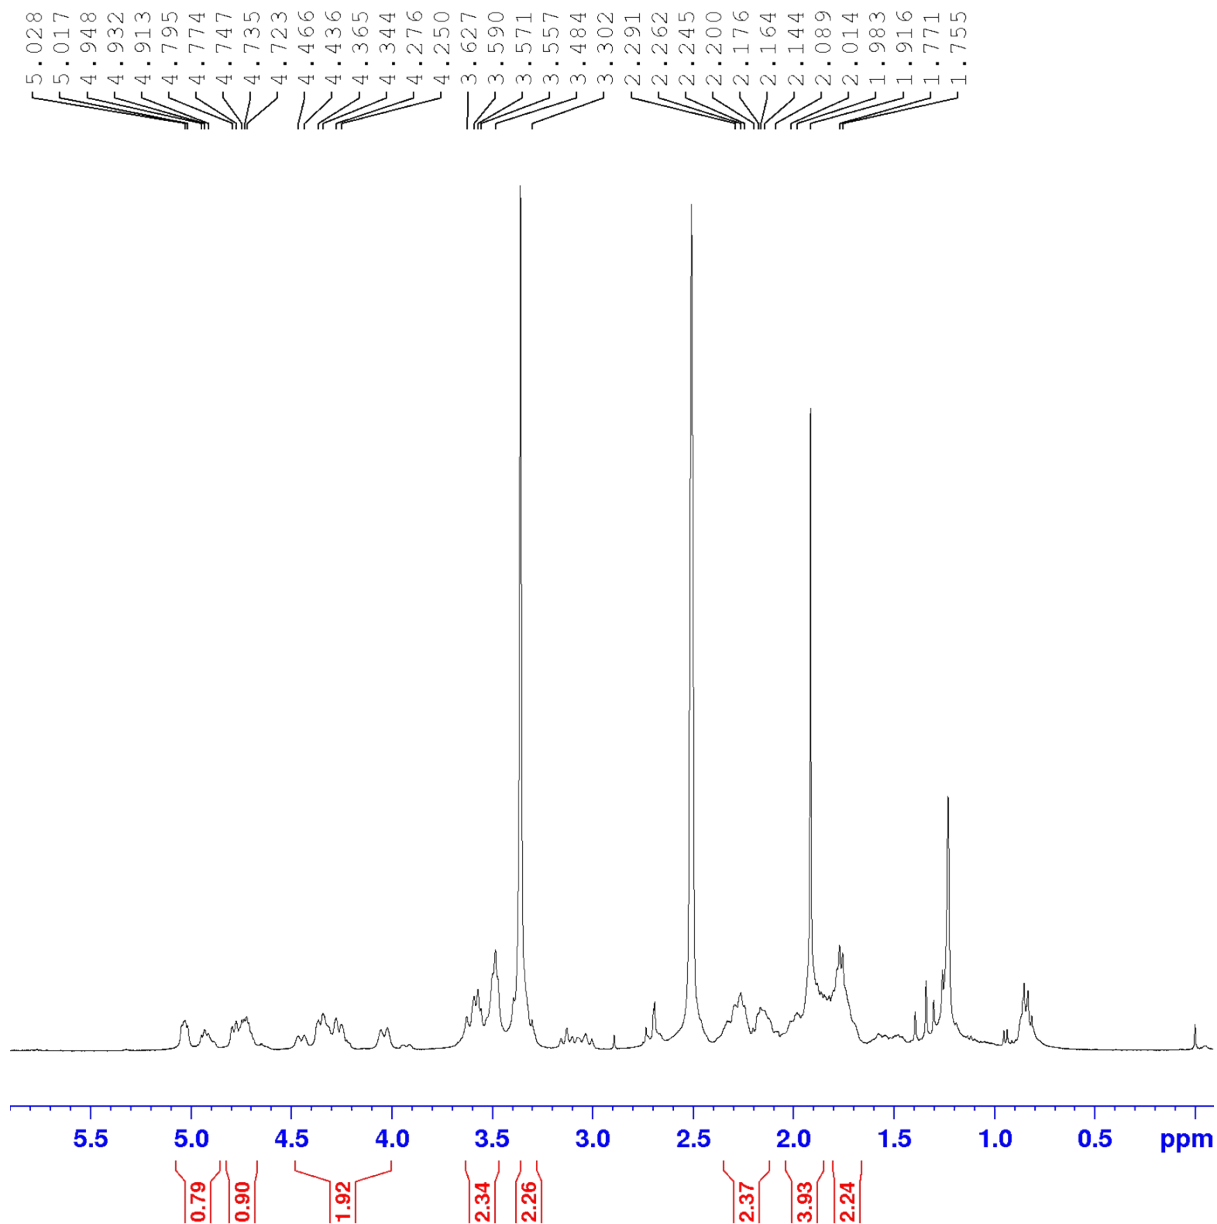

Figure 16. Aliphatic region of the  $^1\text{H}$  NMR spectrum for **12c**

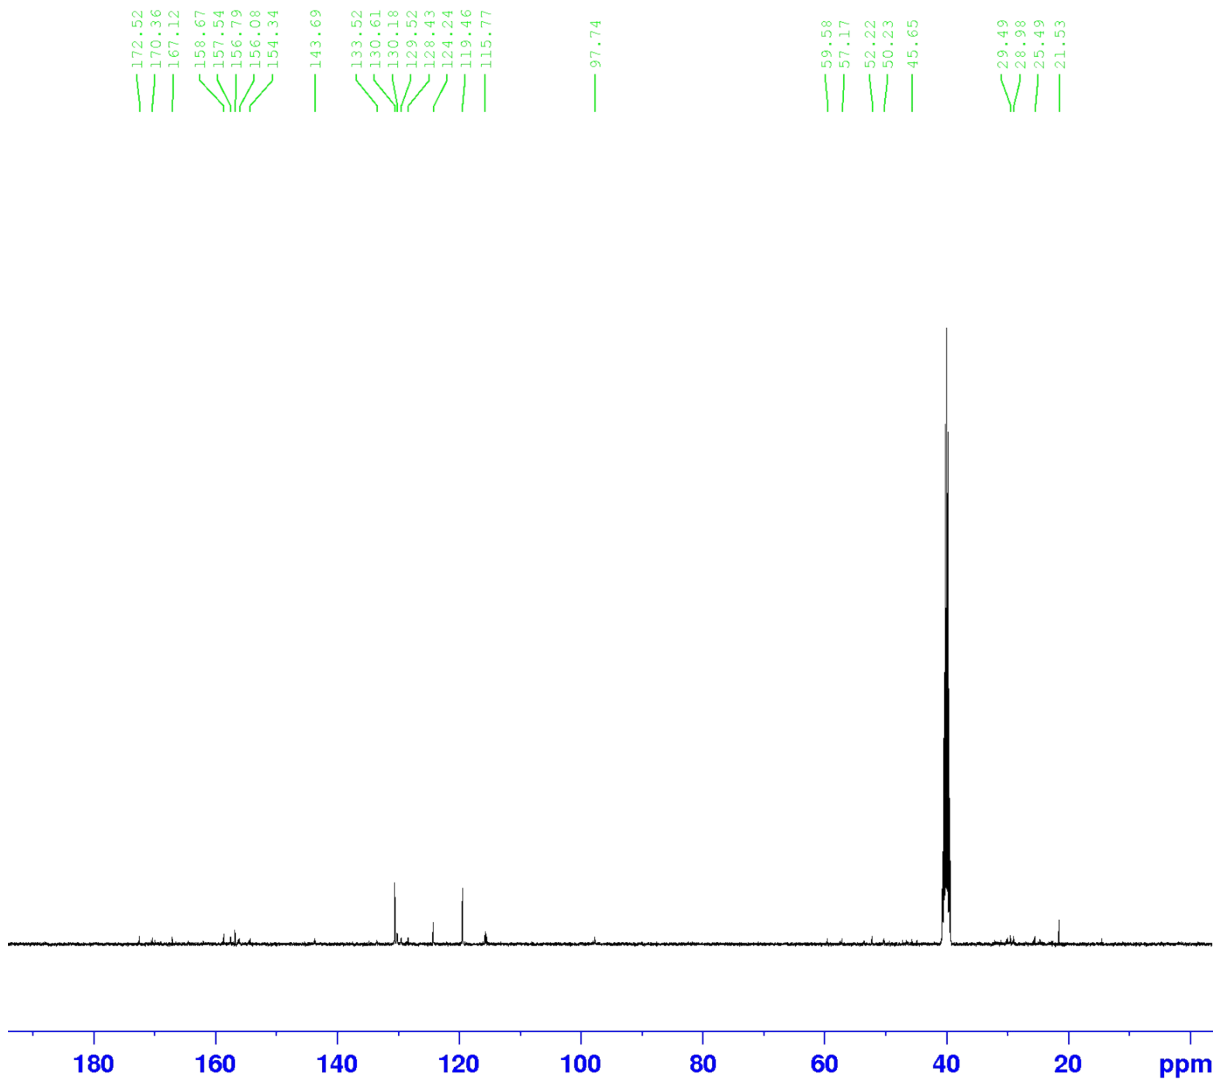

Figure 17.  $^{13}\text{C}$ -NMR spectrum of **12c**

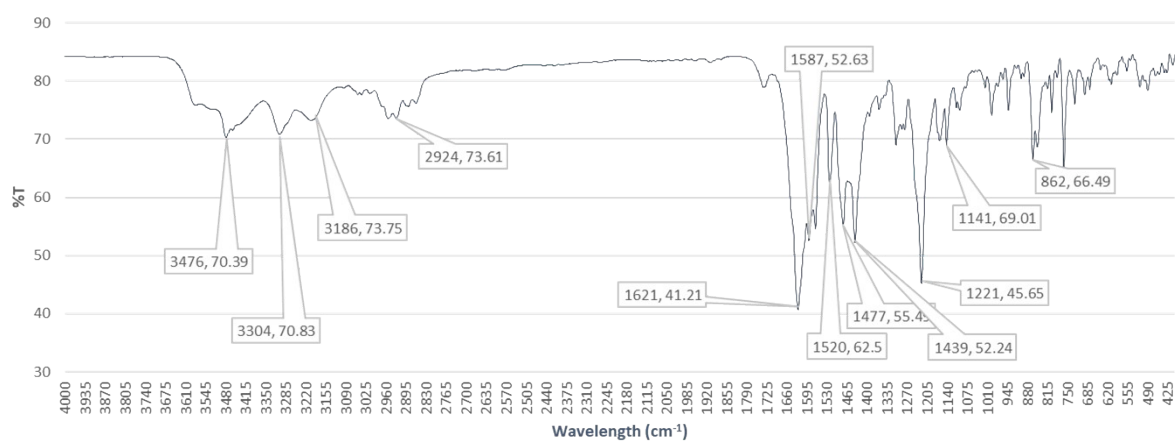

Figure 18. FT-IR spectrum of **12c**

Spectral data of *4-amino-3-(4-phenoxyphenyl)-1-((3R)-1-((2,4,5-trifluorobenzoyl)propyl)piperidin-3-yl)-1H-pyrazolo[3,4-d]pyrimidine (12d)*

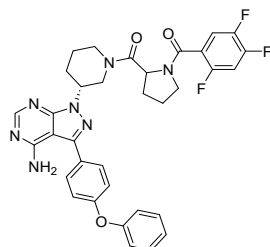



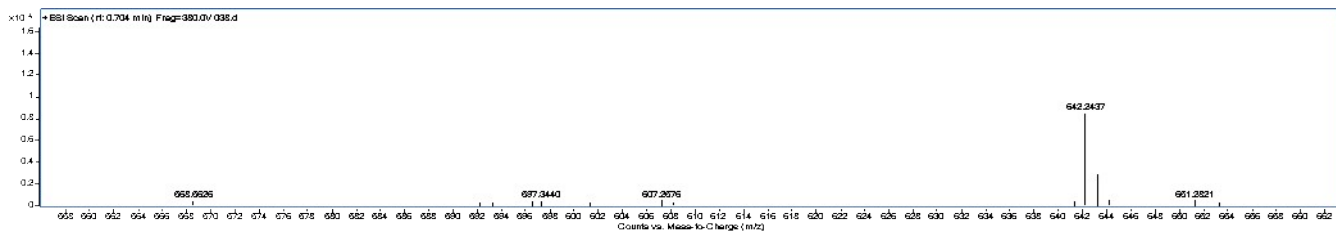

Figure 19. HRMS spectrum of 12d

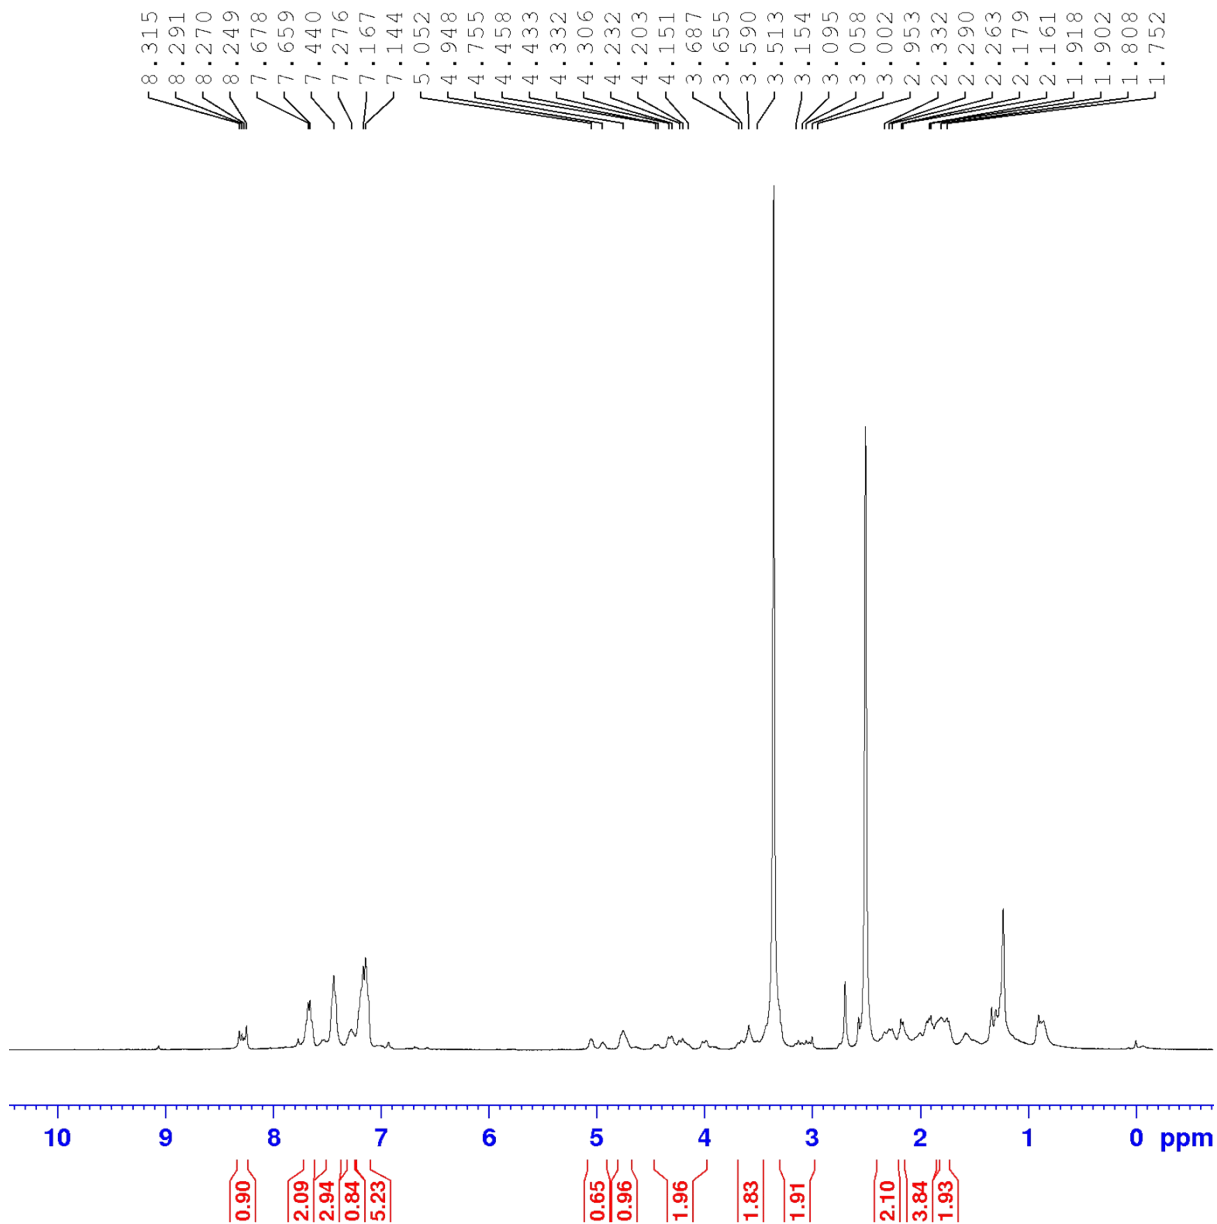

Figure 20. <sup>1</sup>H NMR full spectrum of 12d

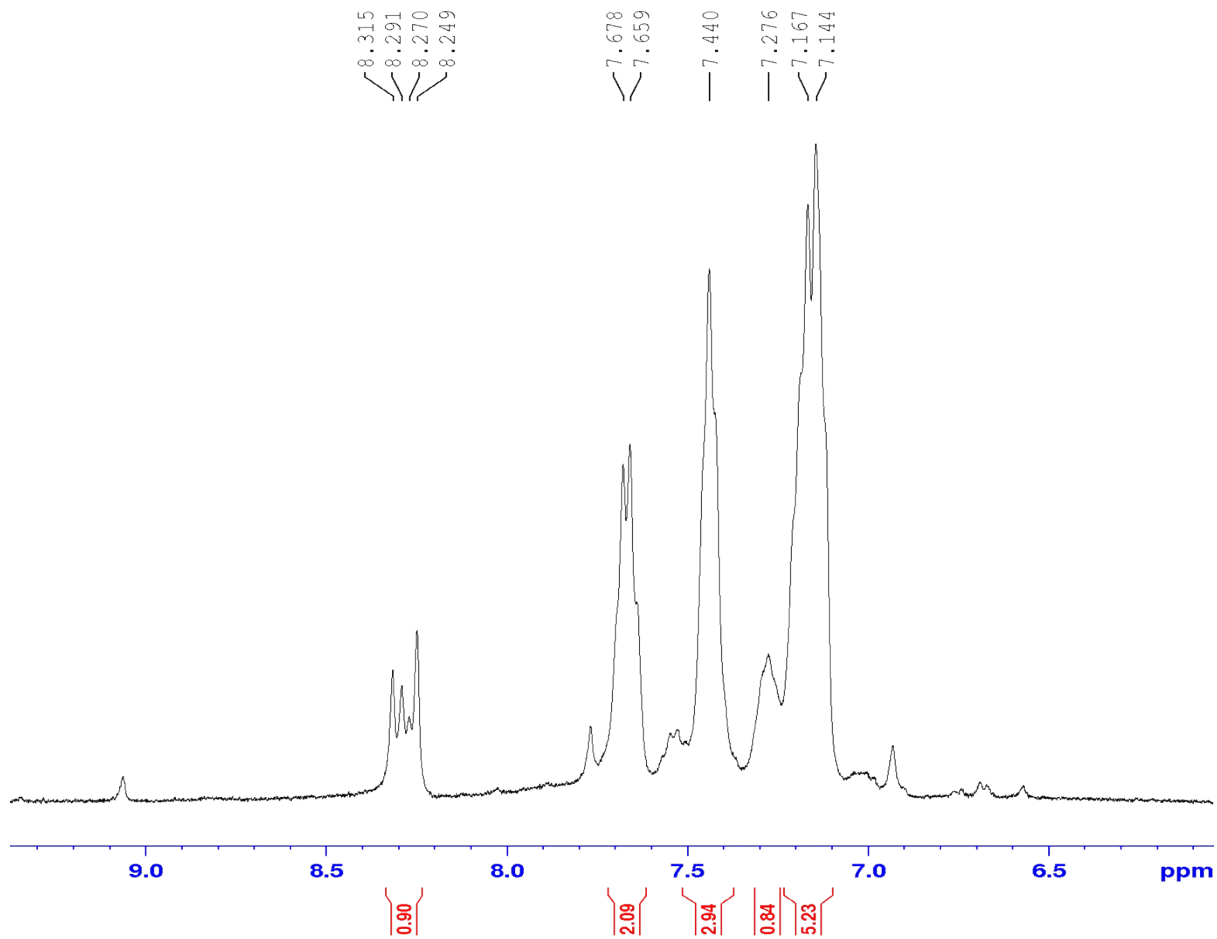

Figure 21. Aromatic region of the  $^1\text{H}$  NMR spectrum for **12d**

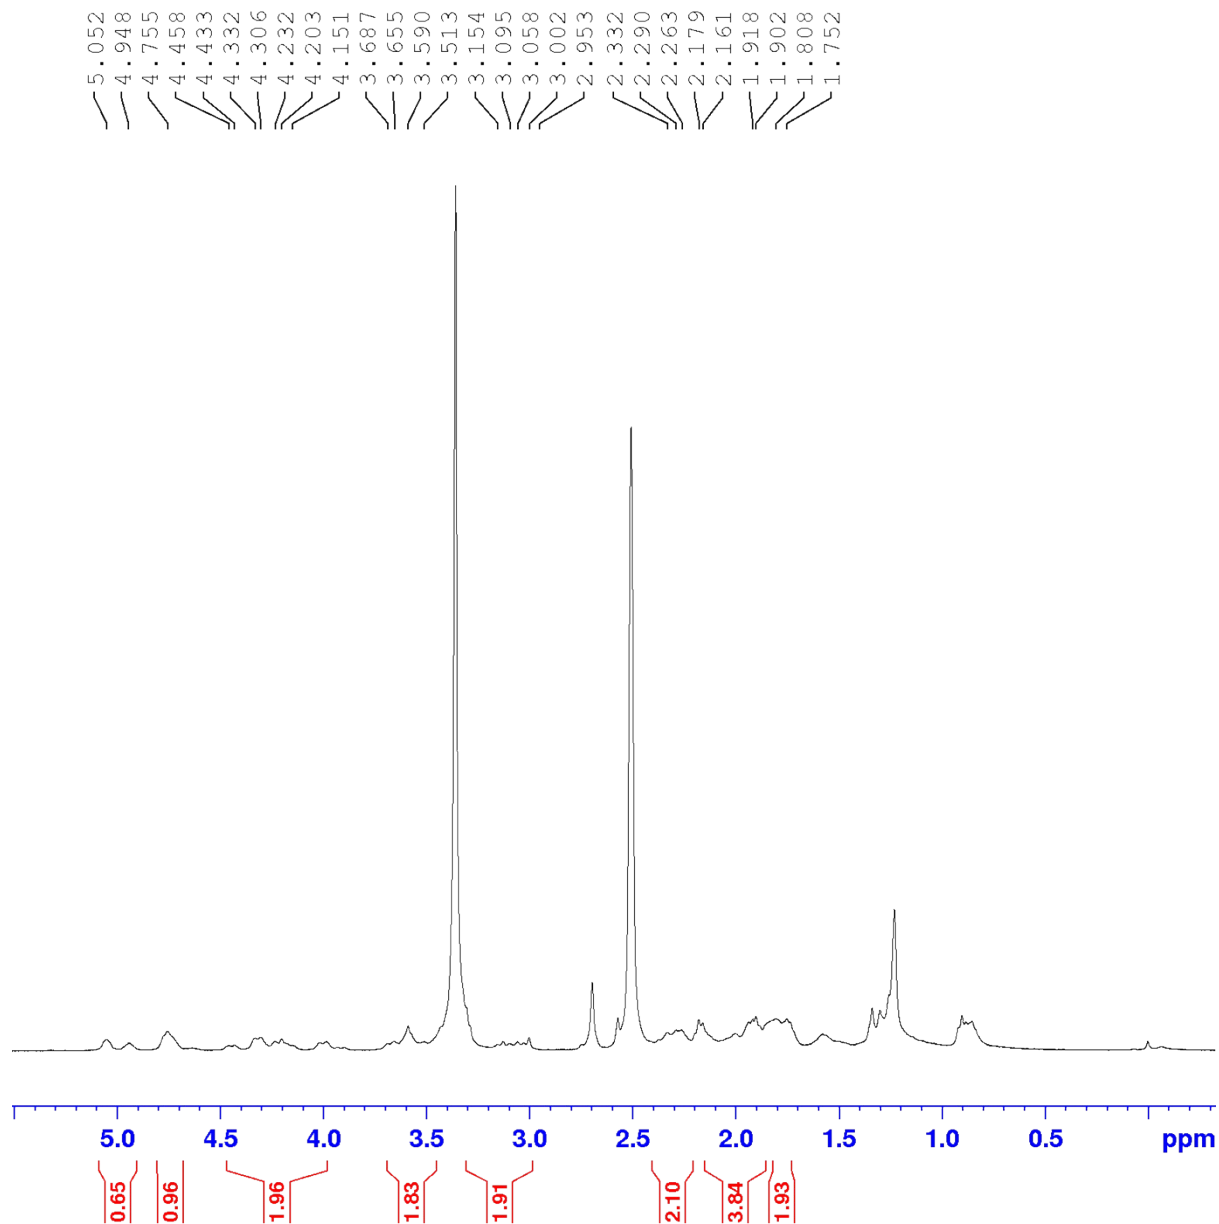

Figure 22. Aliphatic region of the  $^1\text{H}$  NMR spectrum for **12d**

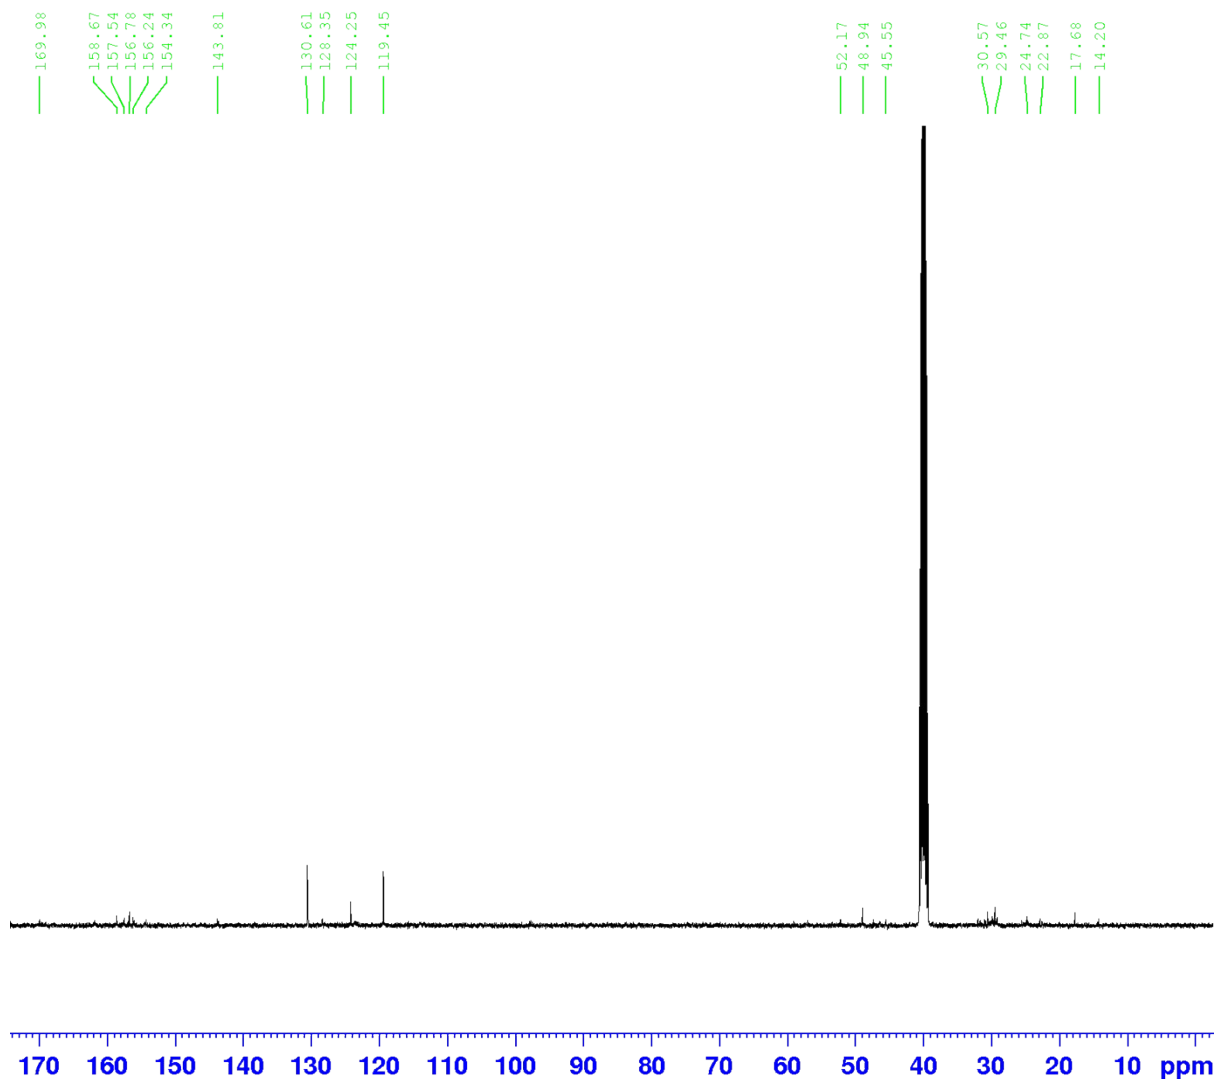

Figure 23.  $^{13}\text{C}$ -NMR spectrum of **12d**

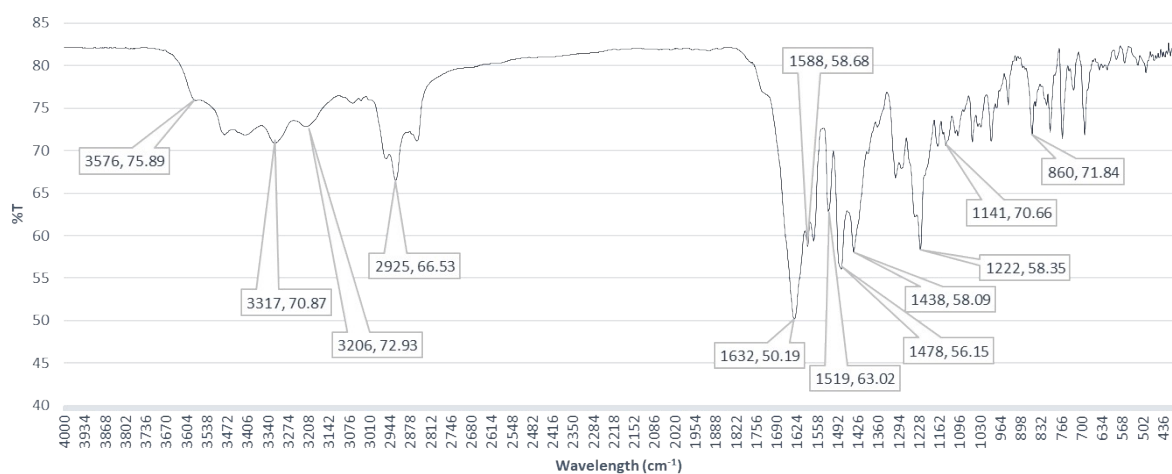

Figure 24. FT-IR spectrum of **12d**

Spectral data of *4-amino-1-((3R)-1-((4-chloropicolinoyl)propyl)piperidin-3-yl)-3-(4-phenoxyphenyl)-1H-pyrazolo[3,4-d]pyrimidine (12e)*

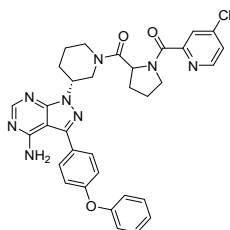

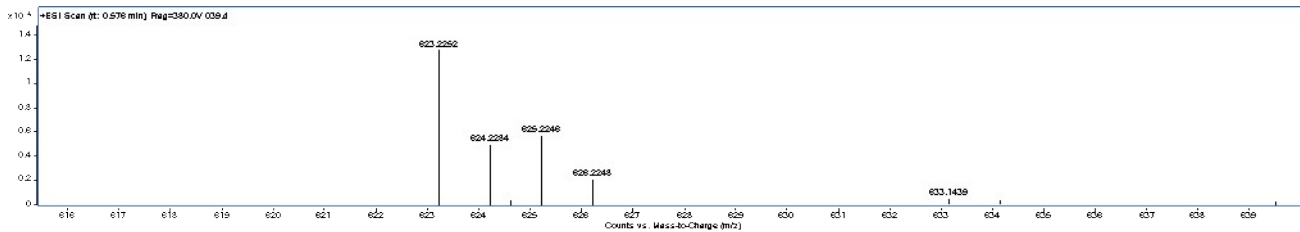

Figure 25. HRMS spectrum of 12e

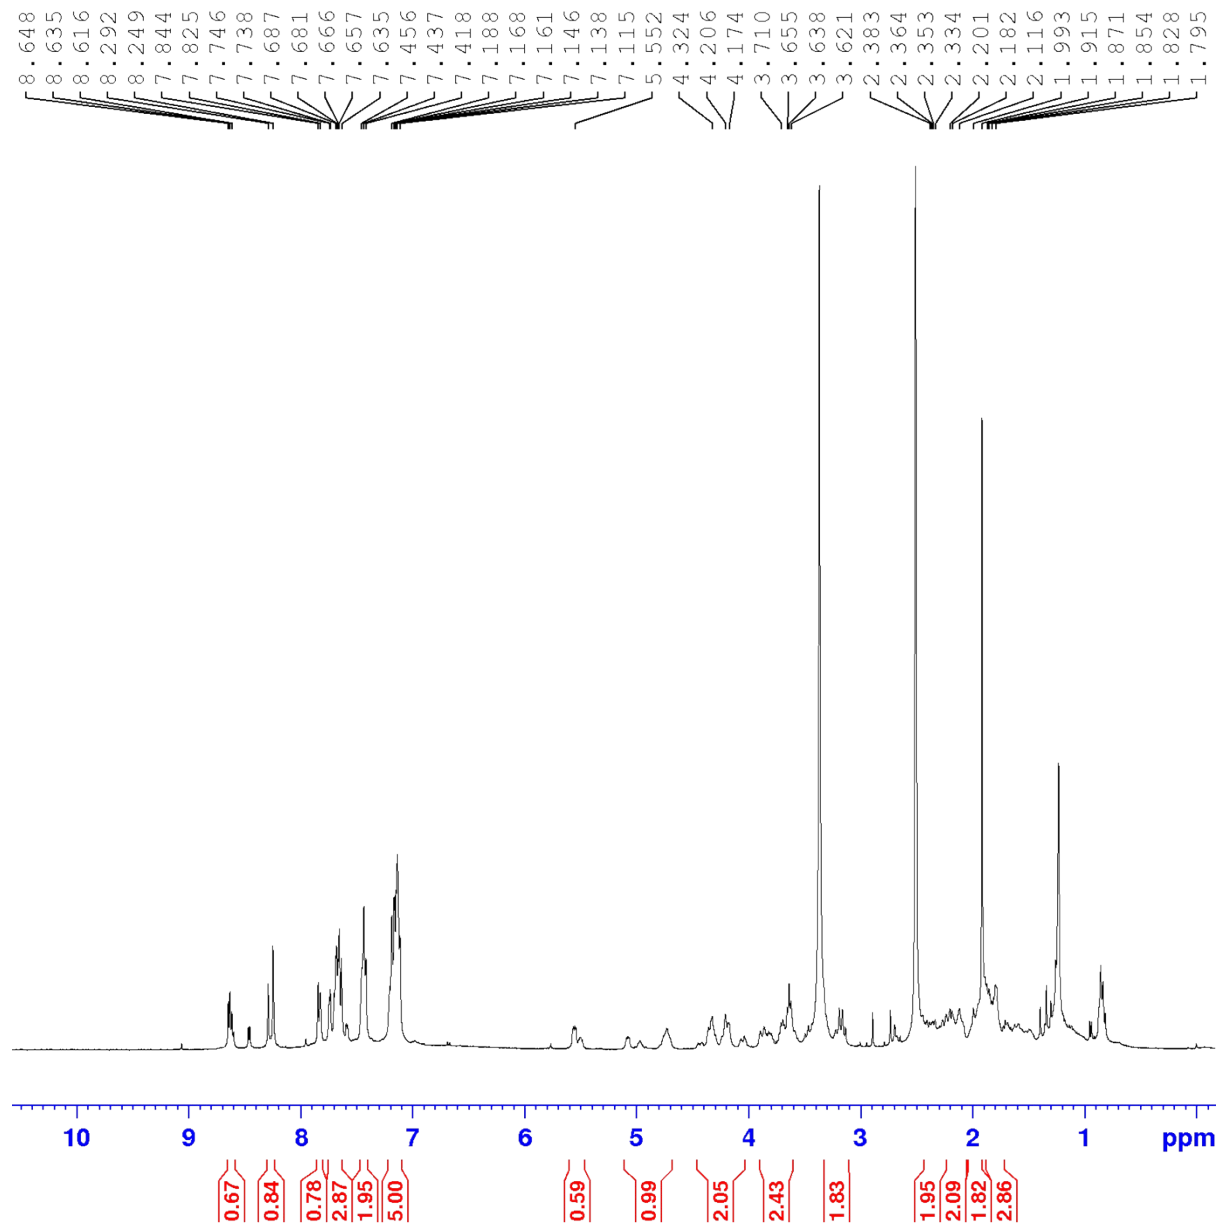

Figure 26. <sup>1</sup>H NMR full spectrum of 12e

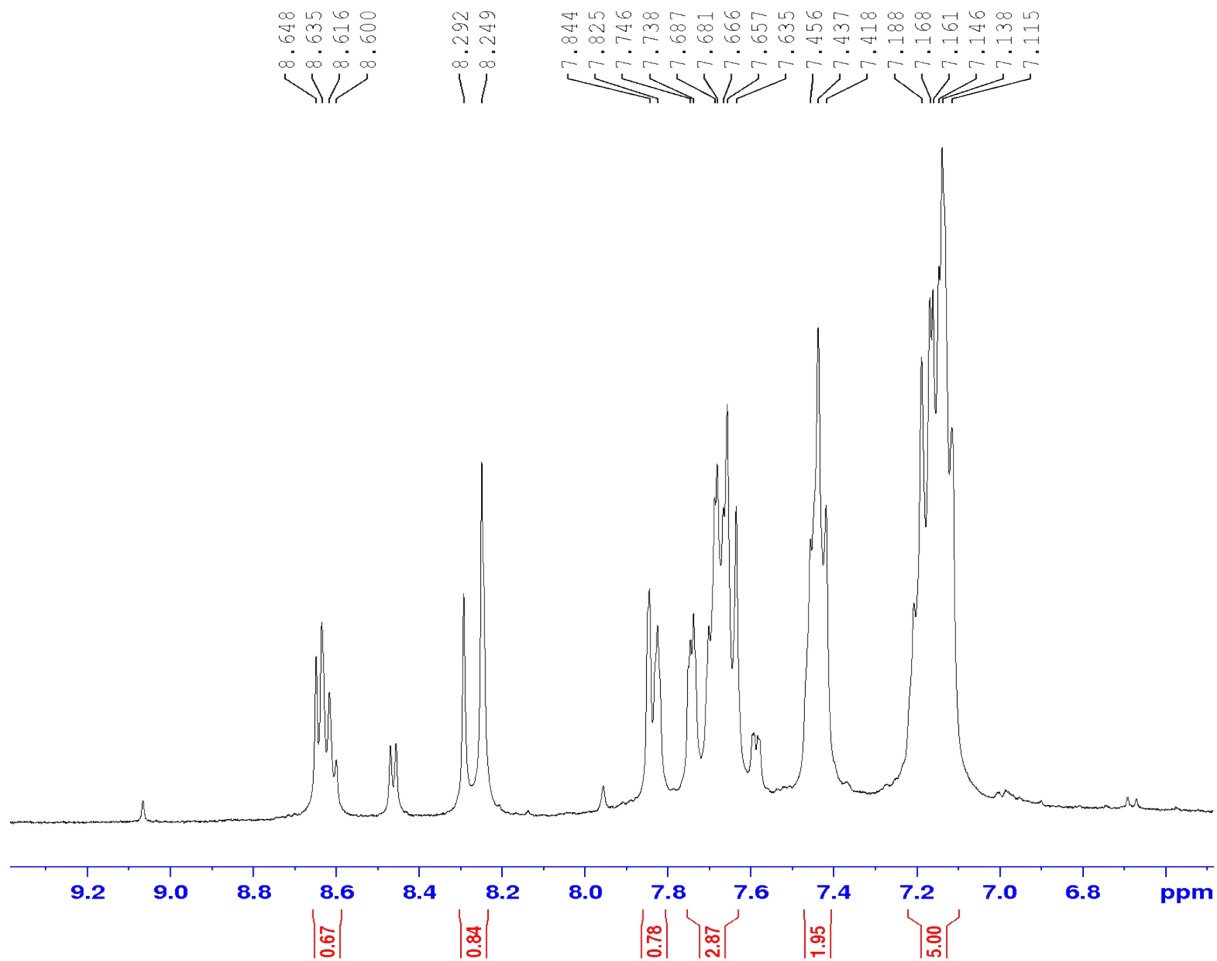

Figure 27. Aromatic region of the  $^1\text{H}$  NMR spectrum for **12e**

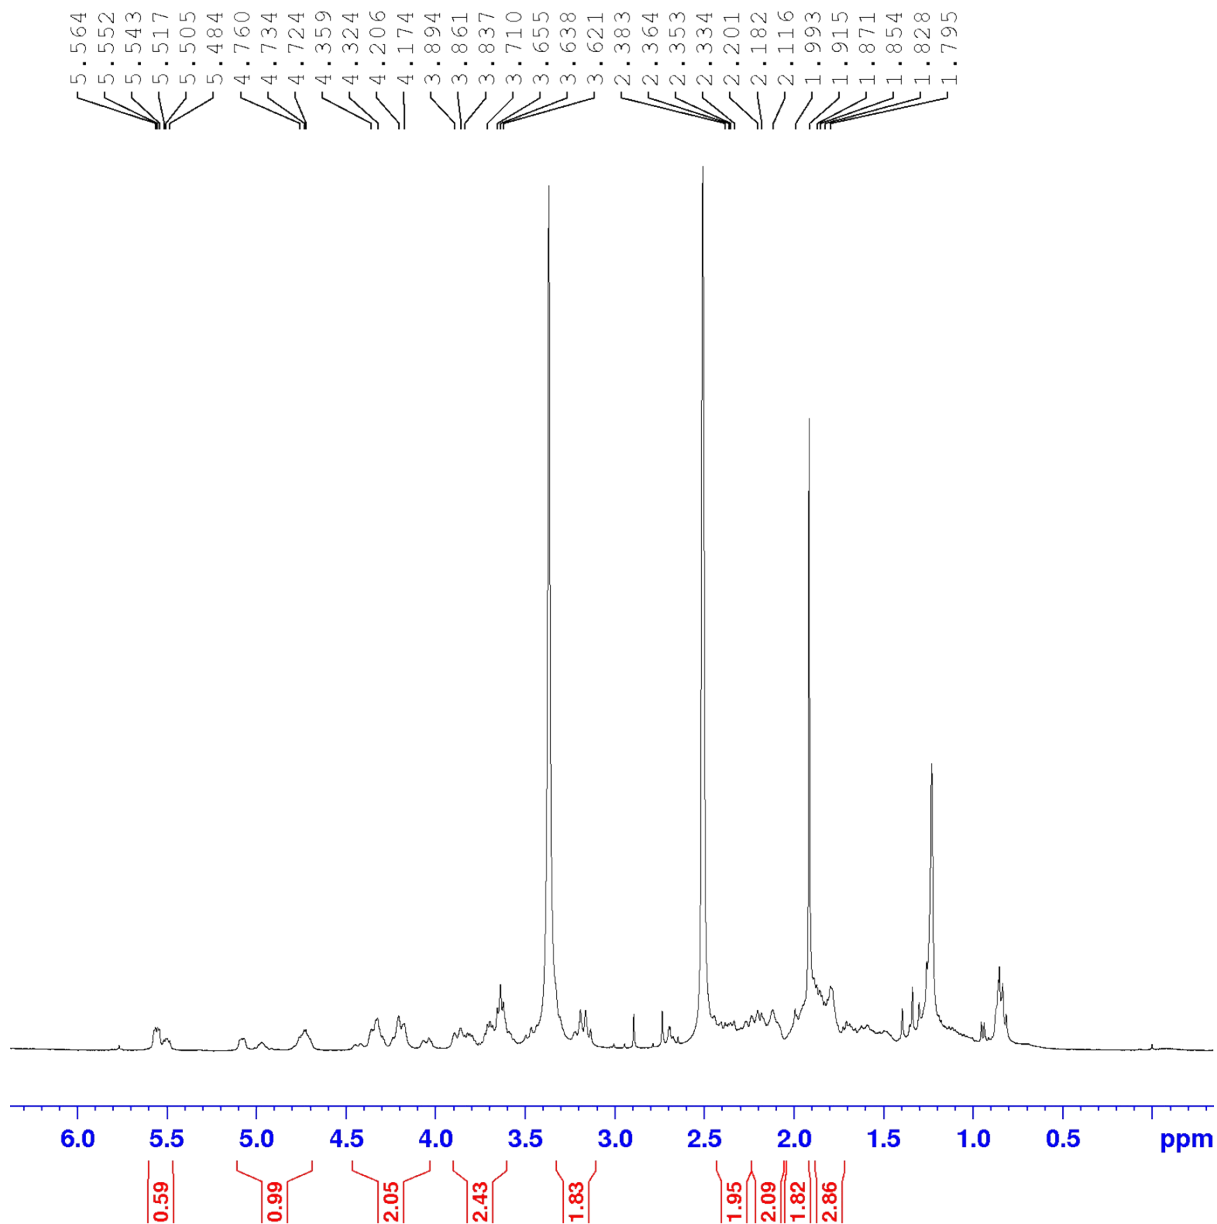

Figure 28. Aliphatic region of the <sup>1</sup>H NMR spectrum for **12e**

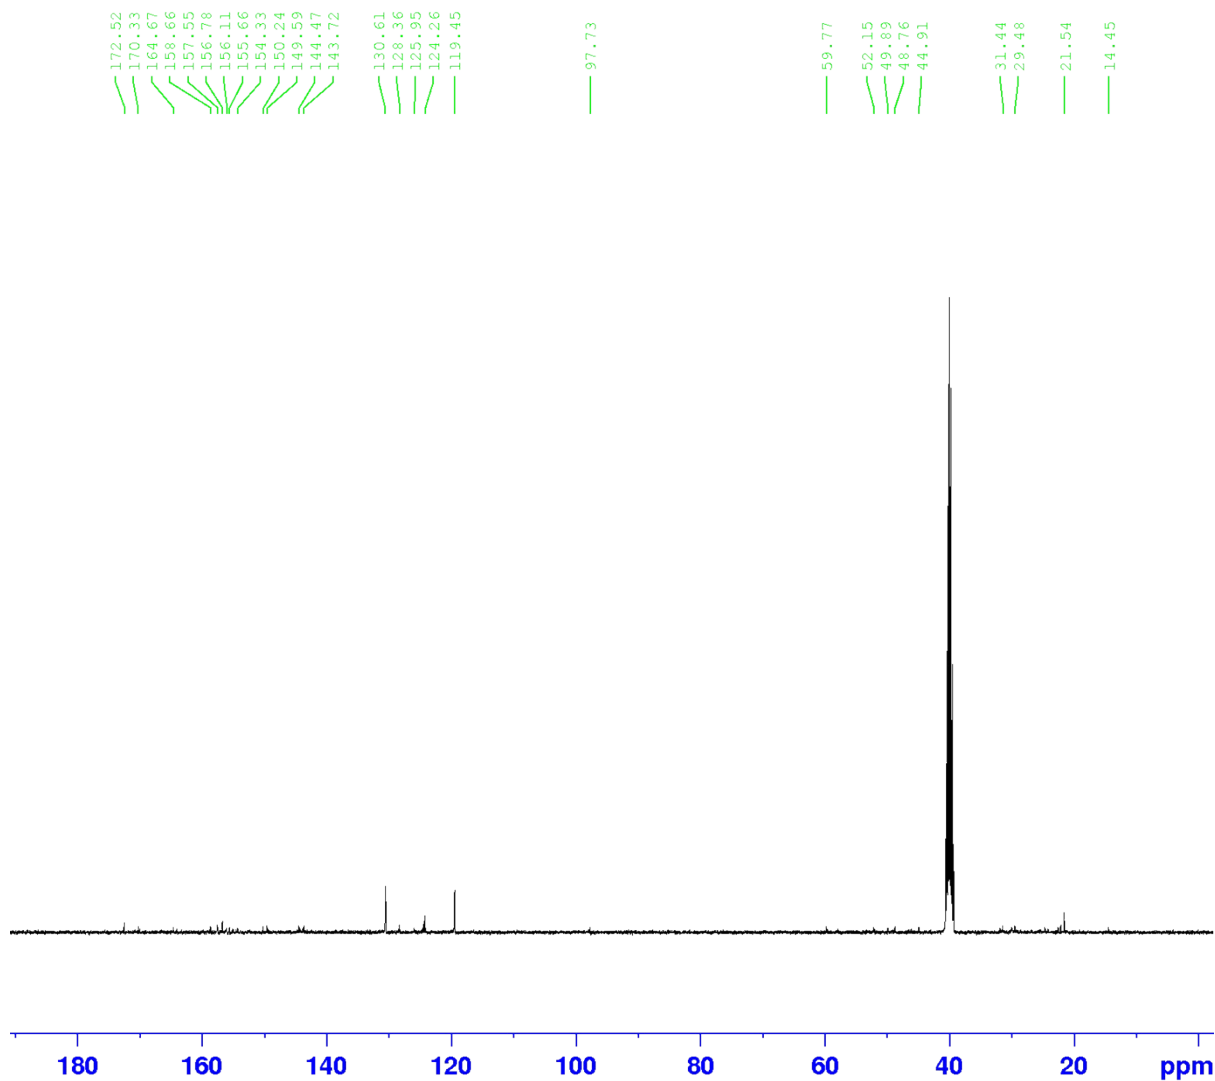

Figure 29.  $^{13}\text{C}$ -NMR spectrum of **12e**

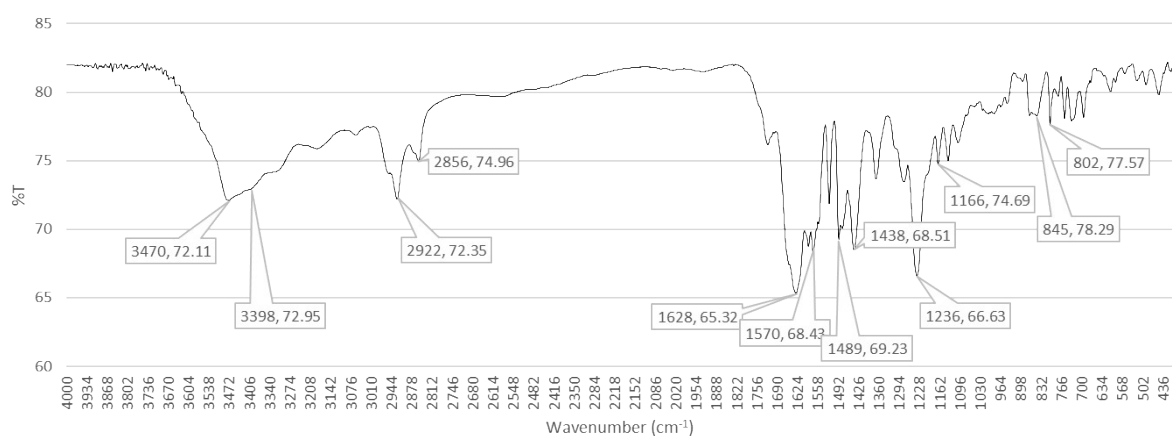

Figure 30. FT-IR spectrum of **12e**

Spectral data of **4-amino-1-((3R)-1-((2,4-difluorobenzoyl)prolyl)piperidin-3-yl)-3-(4-phenoxyphenyl)-1H-pyrazolo[3,4-d]pyrimidine (12f)**

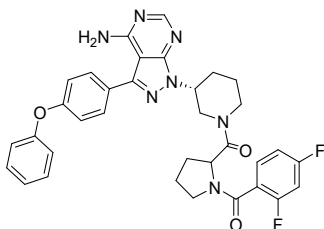



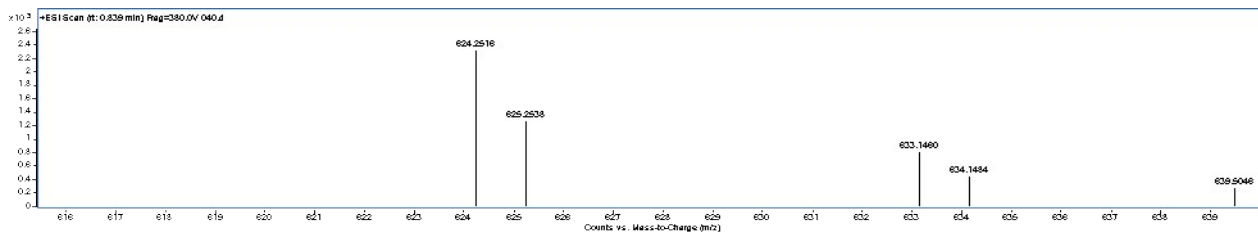

Figure 31. HRMS spectrum of 12f

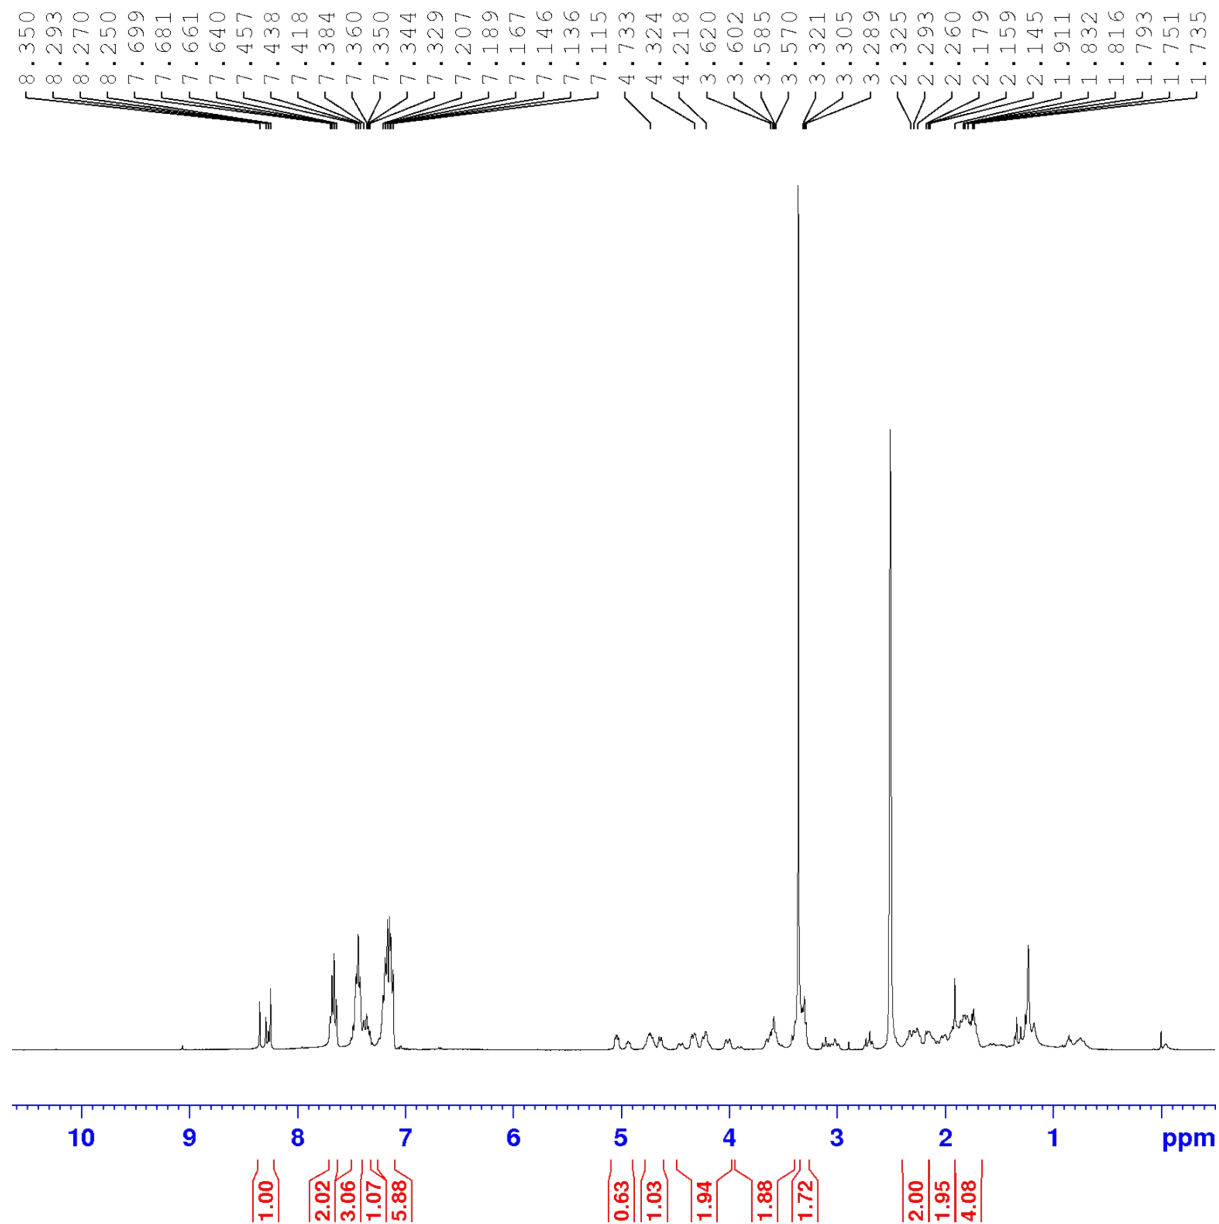

Figure 32. <sup>1</sup>H NMR full spectrum of 12f

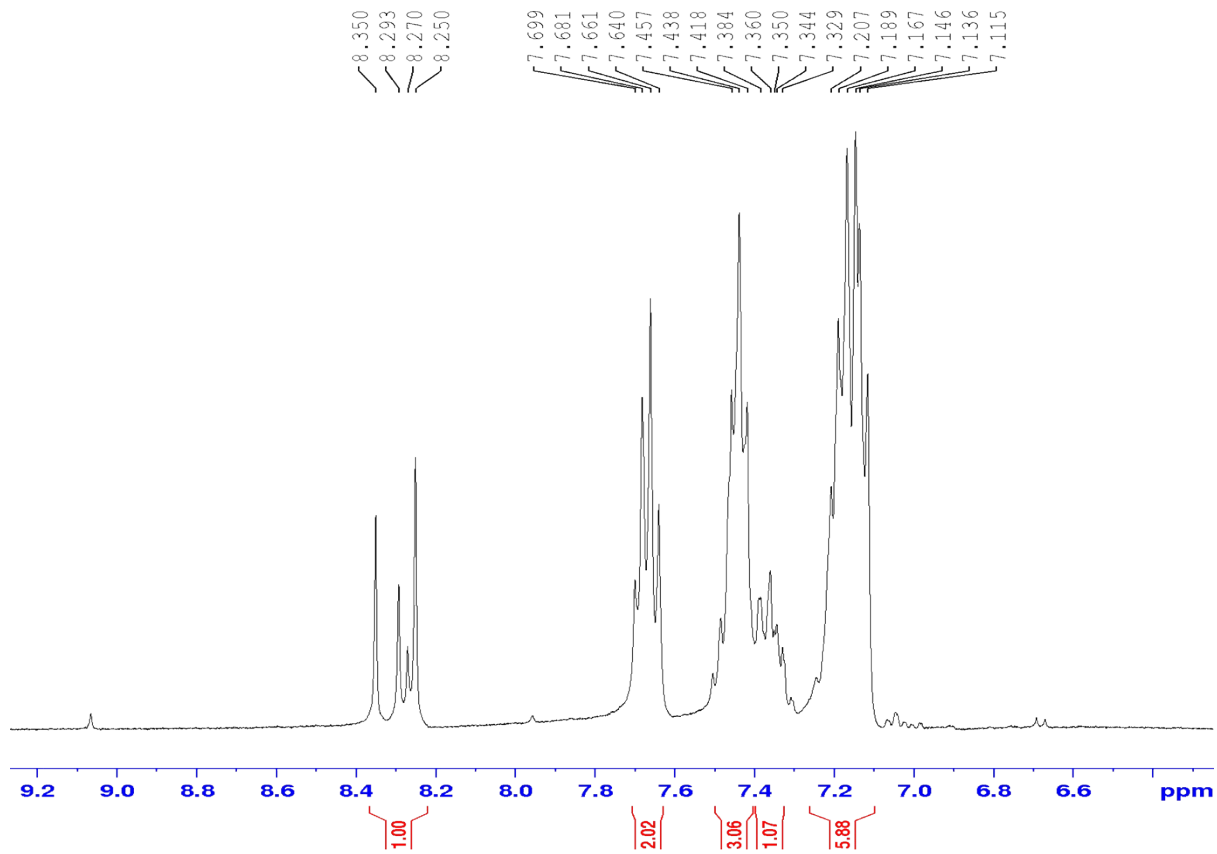

Figure 33. Aromatic region of the  $^1\text{H}$  NMR spectrum for **12f**

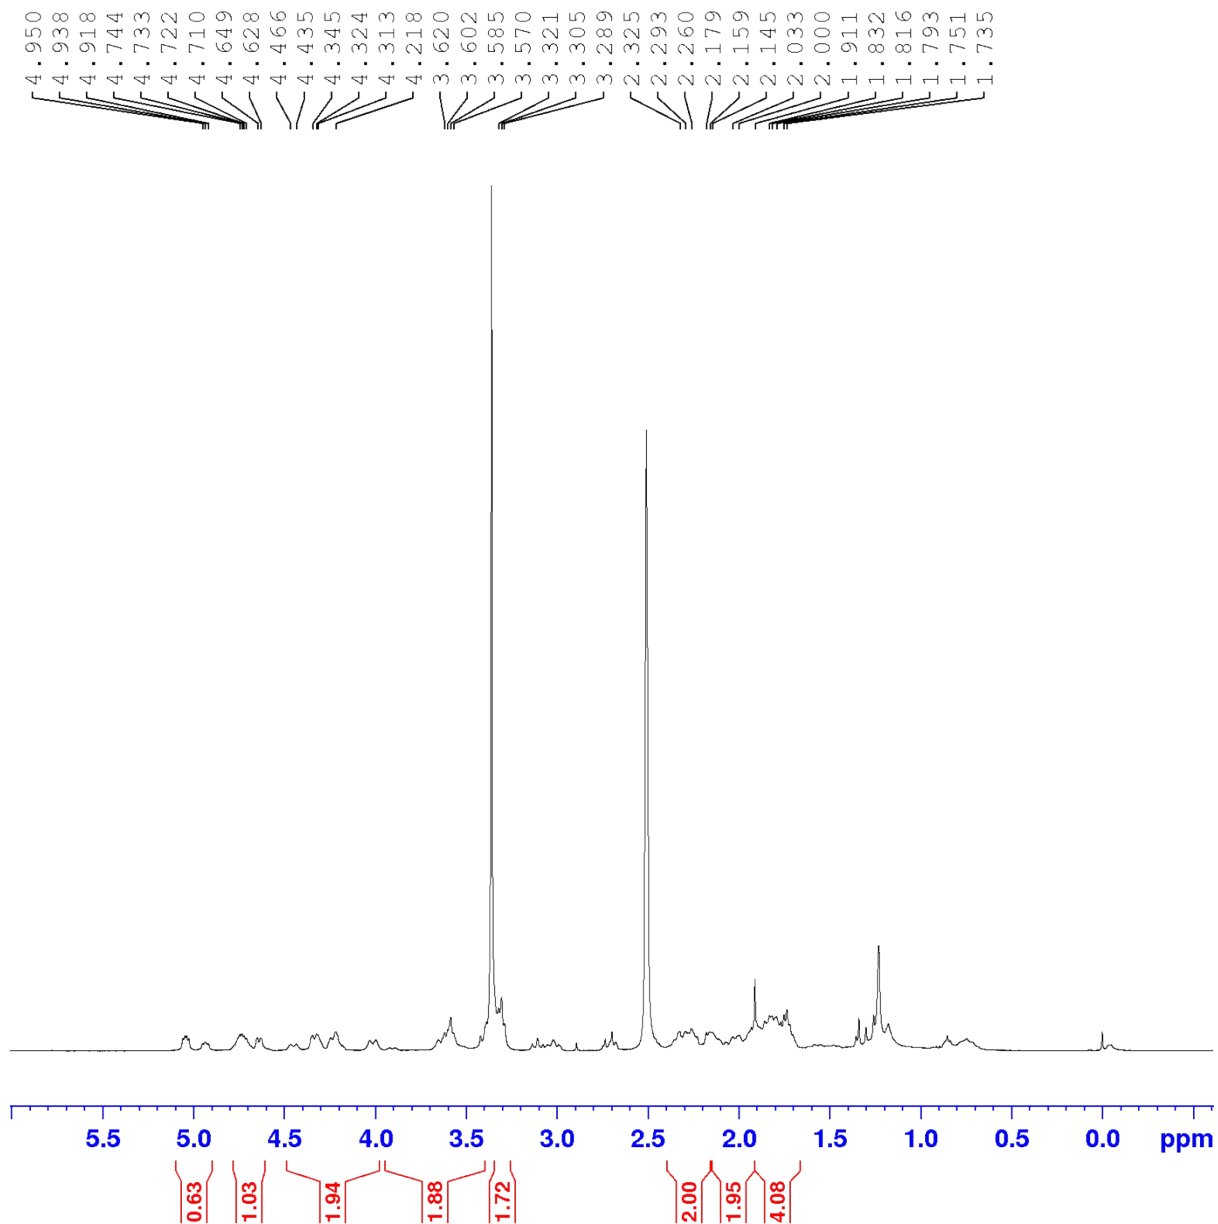

Figure 34. Aliphatic region of the  $^1\text{H}$  NMR spectrum for **12f**

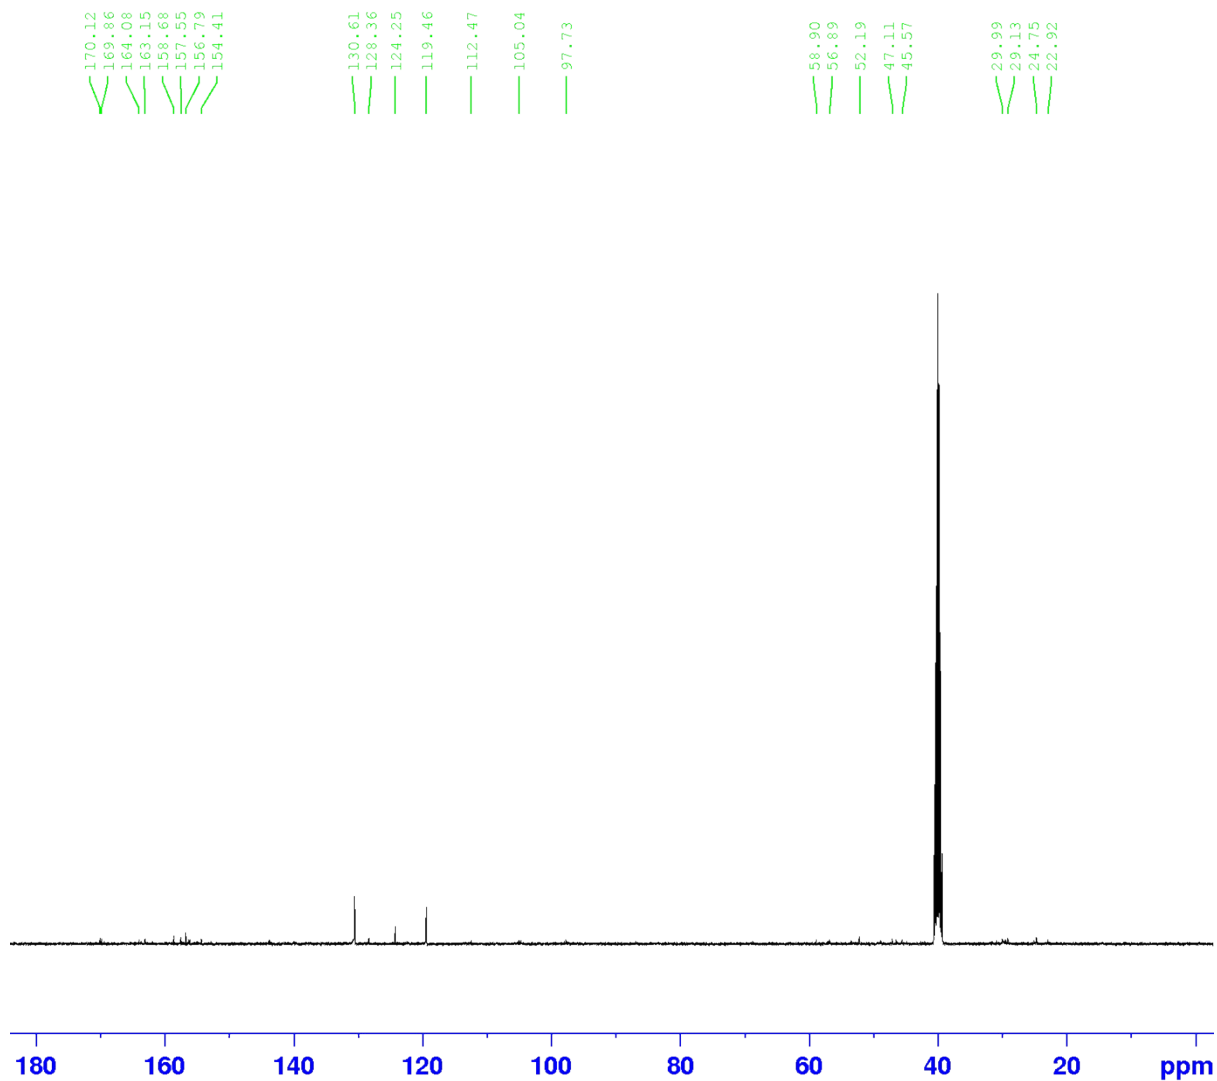

Figure 35.  $^{13}\text{C}$ -NMR spectrum of **12f**

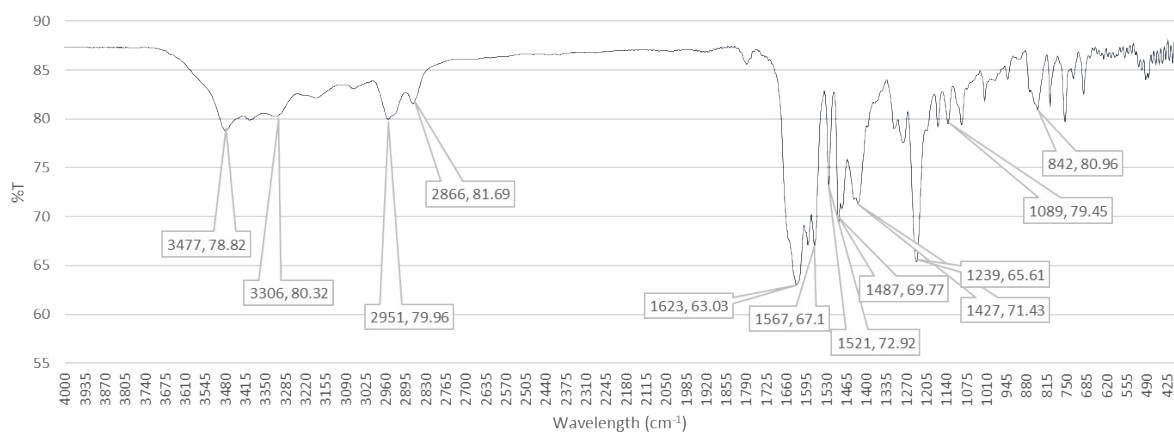

Figure 36. FT-IR spectrum of **12f**

Spectral data of *4-amino-1-((3R)-1-(benzoylpropyl)piperidin-3-yl)-3-(4-phenoxyphenyl)-1H-pyrazolo[3,4-d]pyrimidine (12g)*

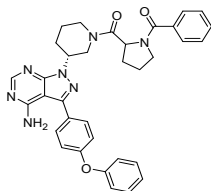

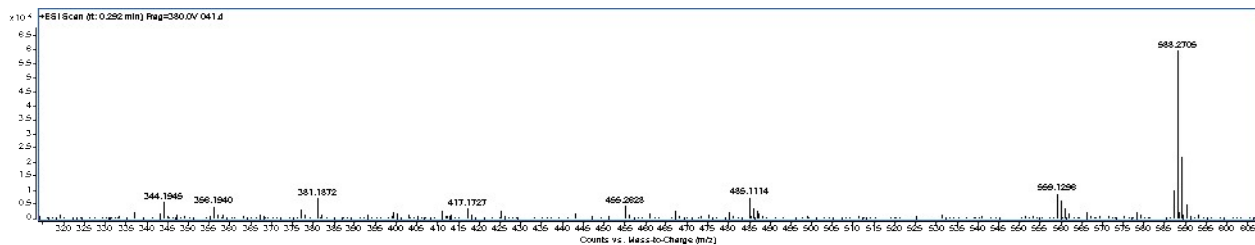

Figure 37. HRMS spectrum of **12g**

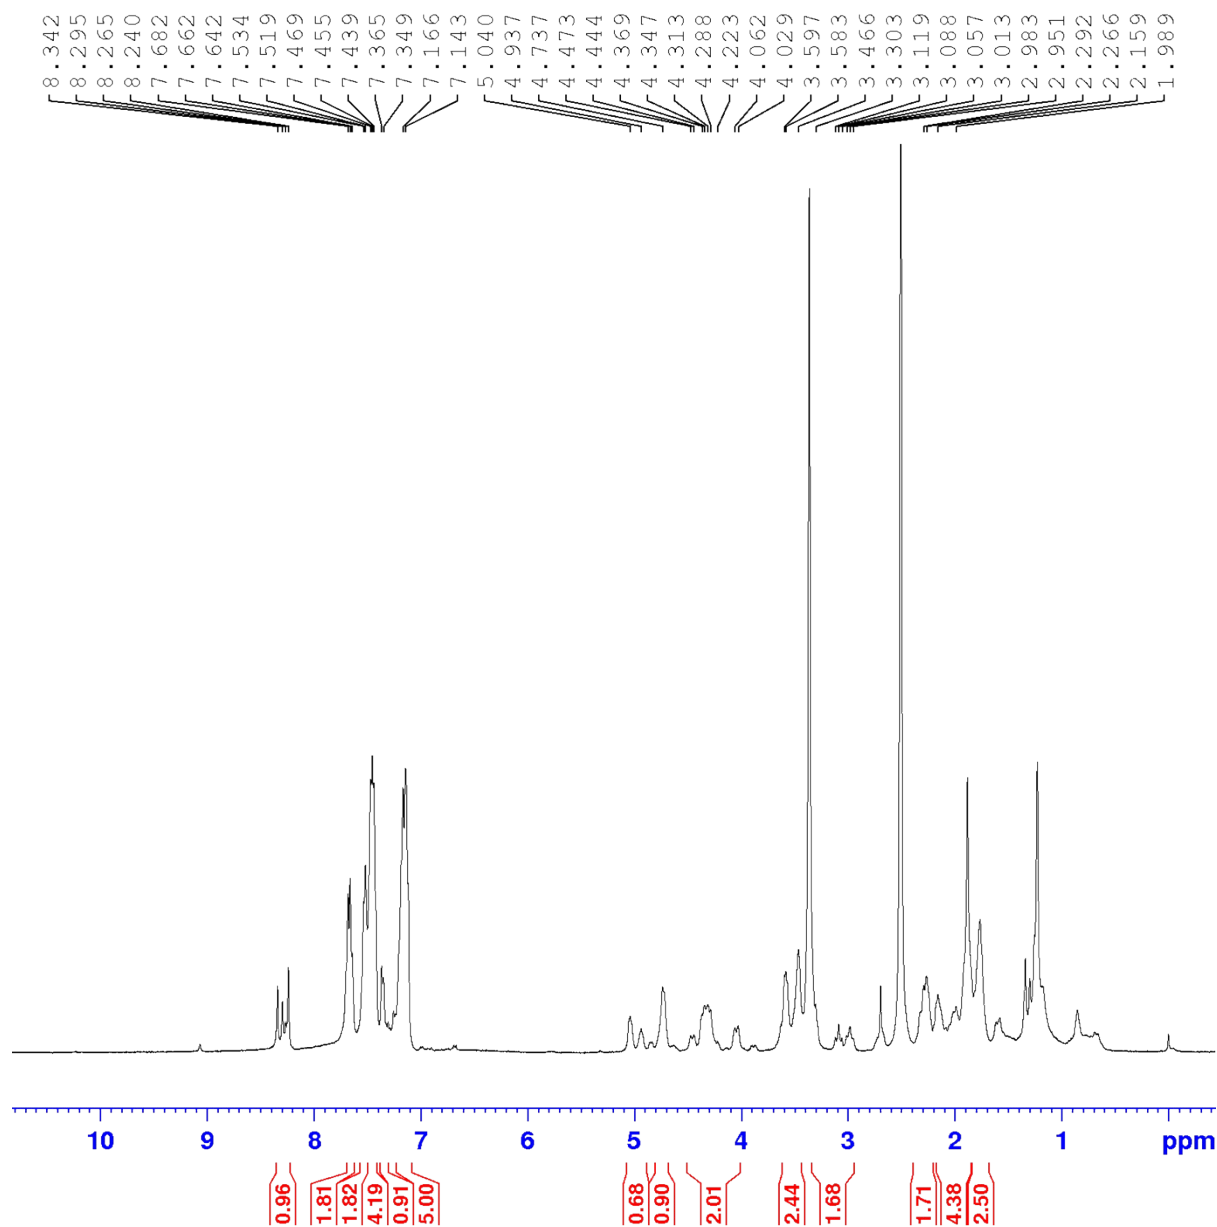

Figure 38. <sup>1</sup>H NMR full spectrum of **12g**

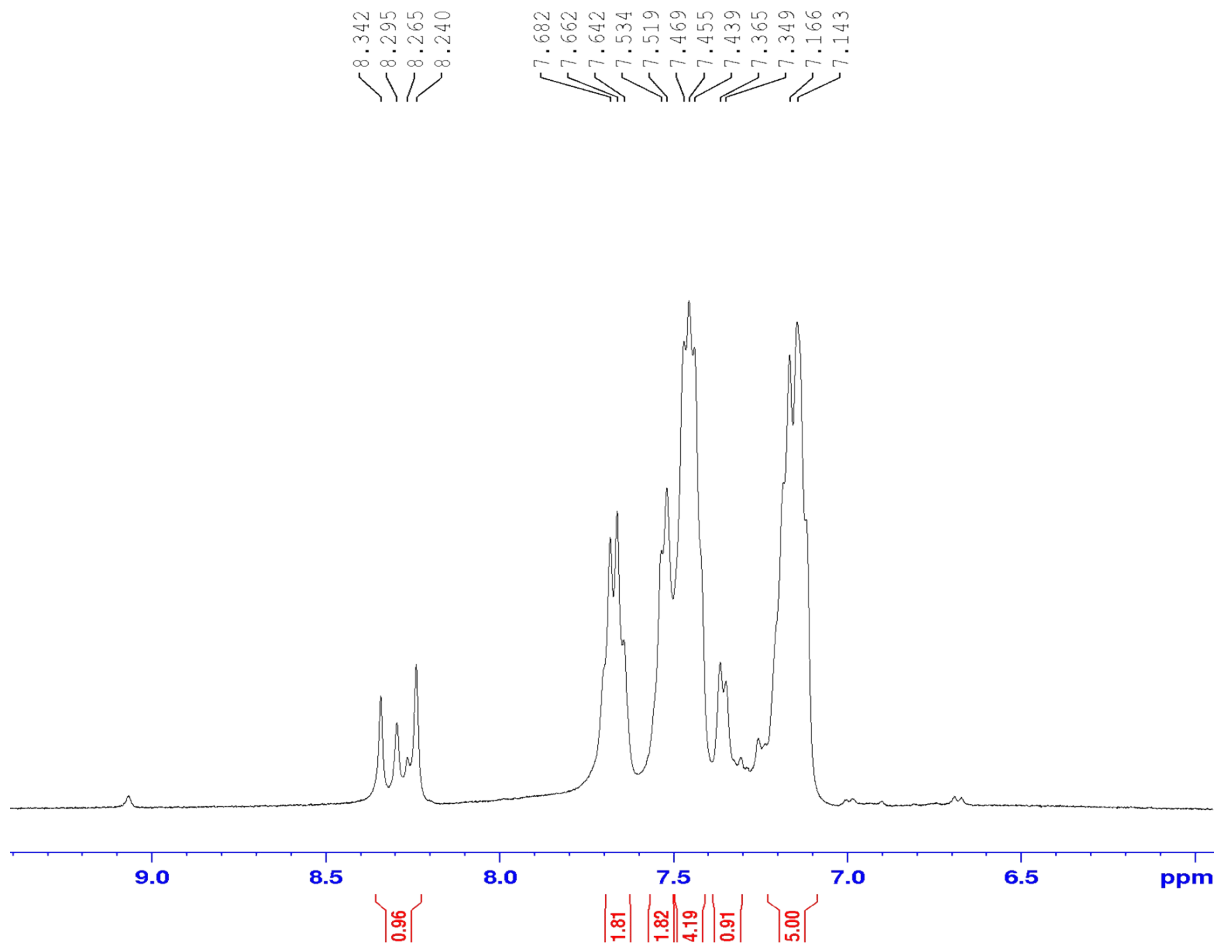

Figure 39. Aromatic region of the  $^1\text{H}$  NMR spectrum for **12g**

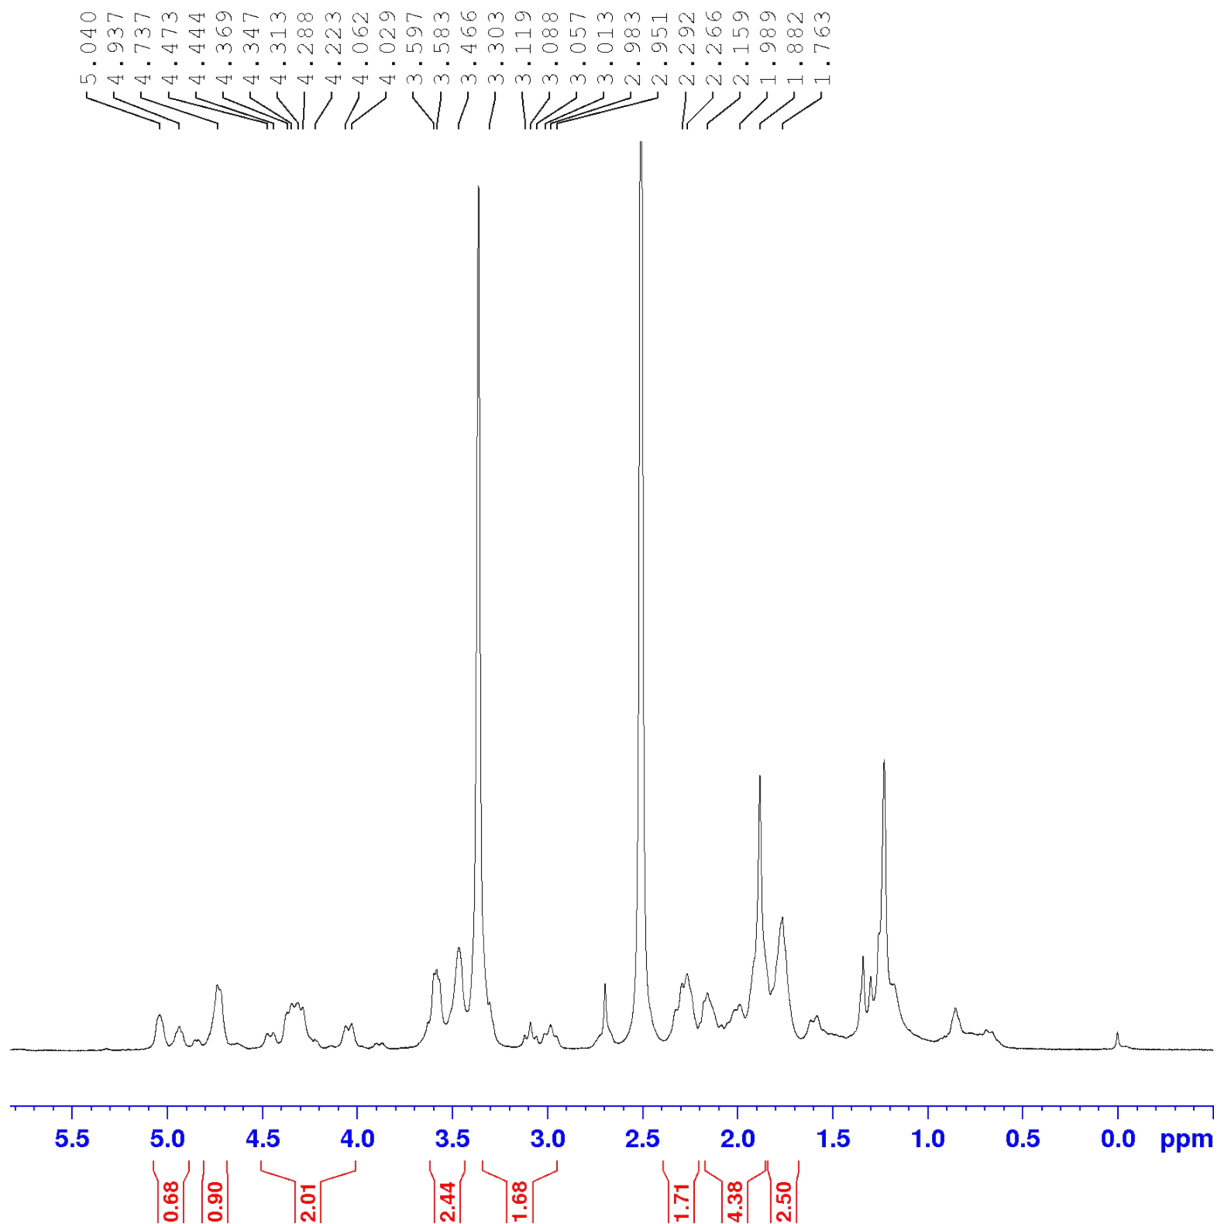

Figure 40. Aliphatic region of the  $^1\text{H}$  NMR spectrum for **12g**

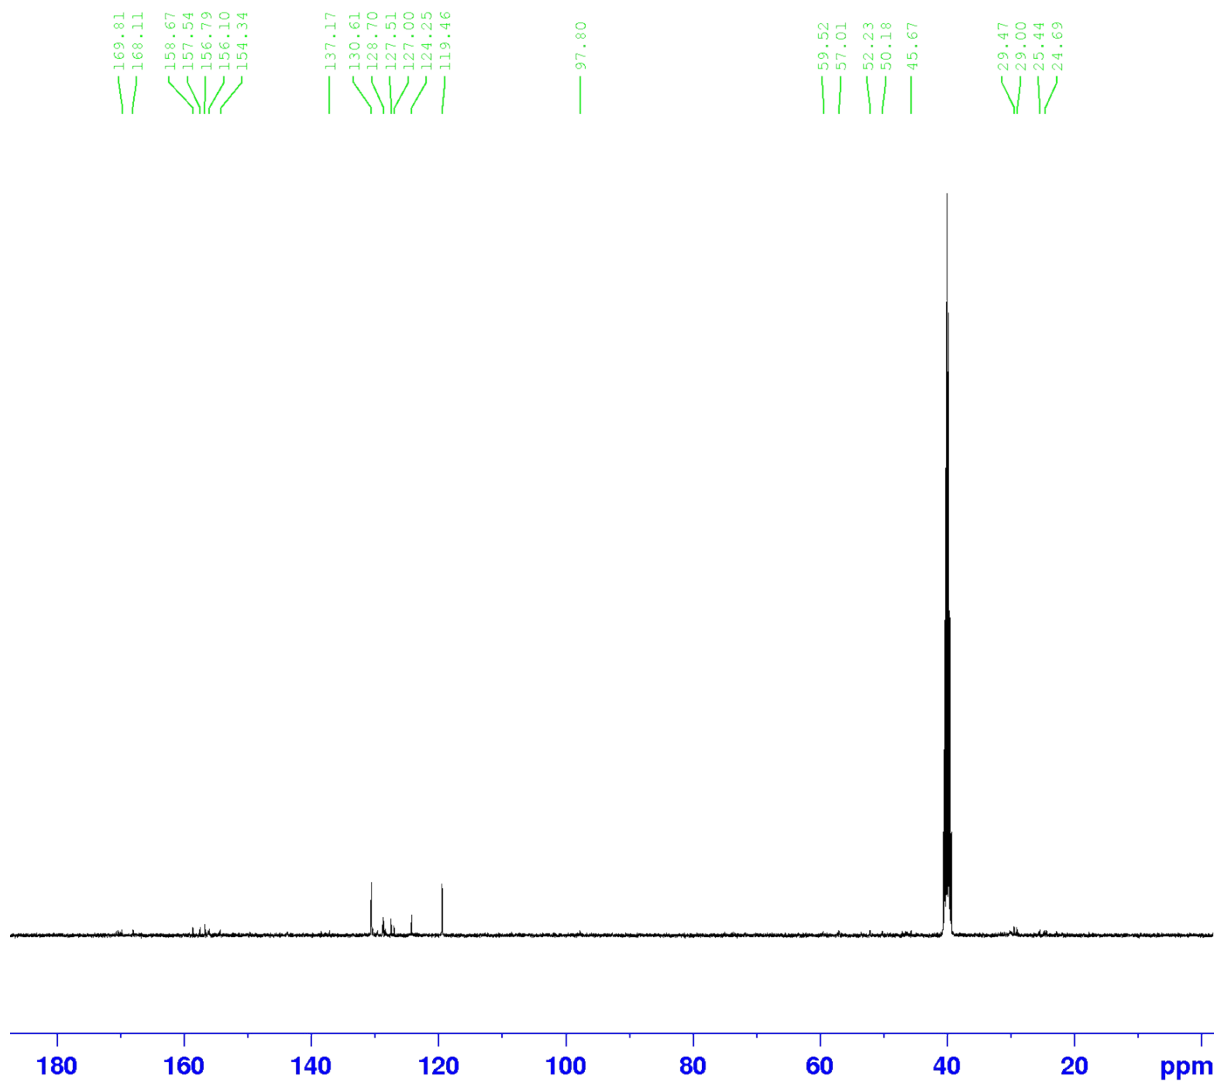

Figure 41.  $^{13}\text{C}$ -NMR spectrum of **12g**

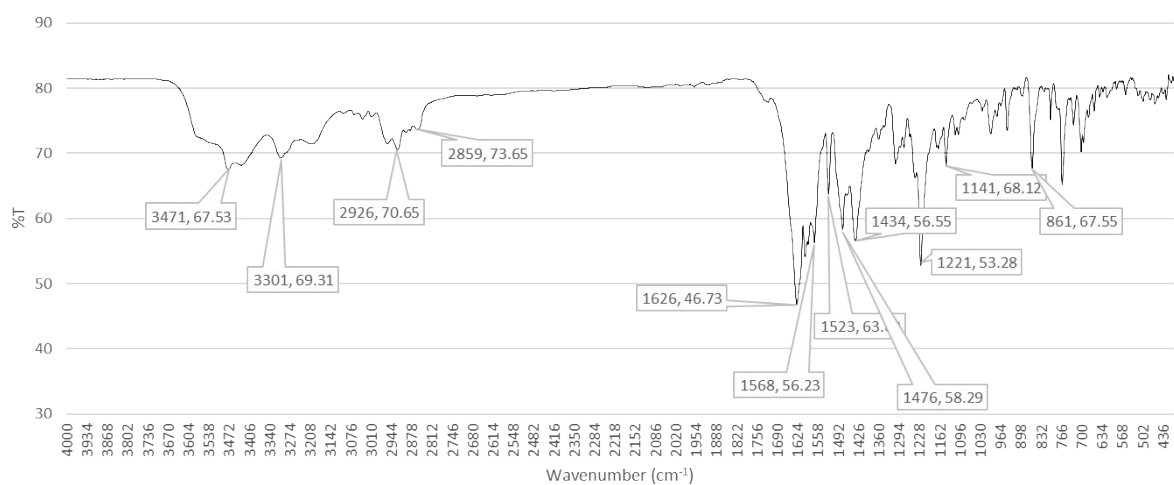

Figure 42. FT-IR spectrum of **12g**

Spectral data of *4-amino-3-(4-phenoxyphenyl)-1-((3R)-1-(picolinoylpropyl)piperidin-3-yl)-1H-pyrazolo[3,4-d]pyrimidine (12h)*



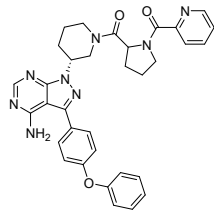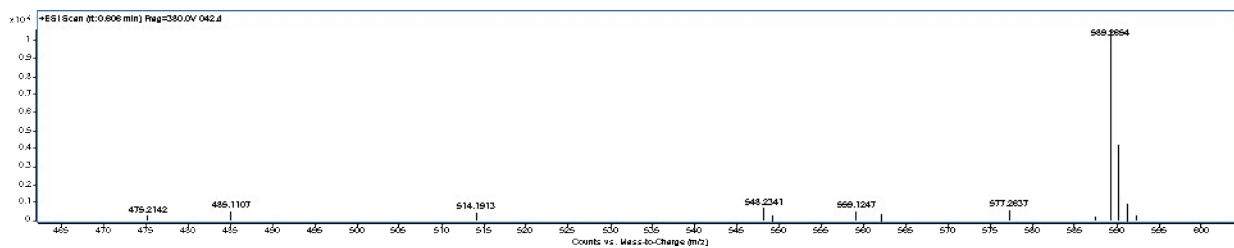

Figure 43. HRMS spectrum of **12h**

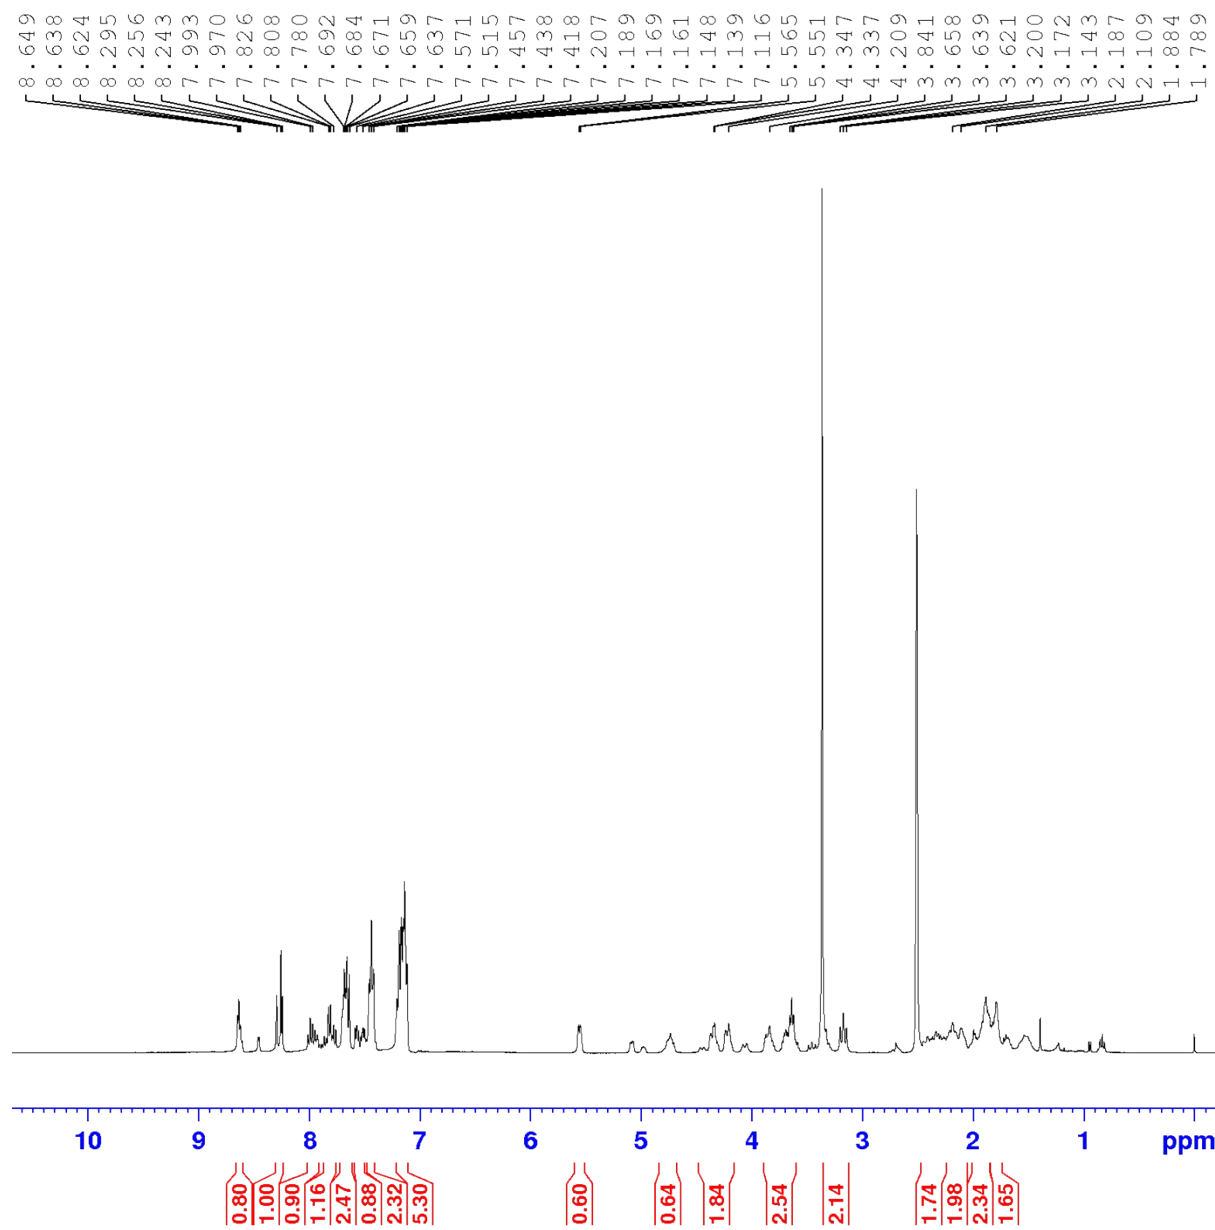

Figure 44.  $^1\text{H}$  NMR full spectrum of **12h**

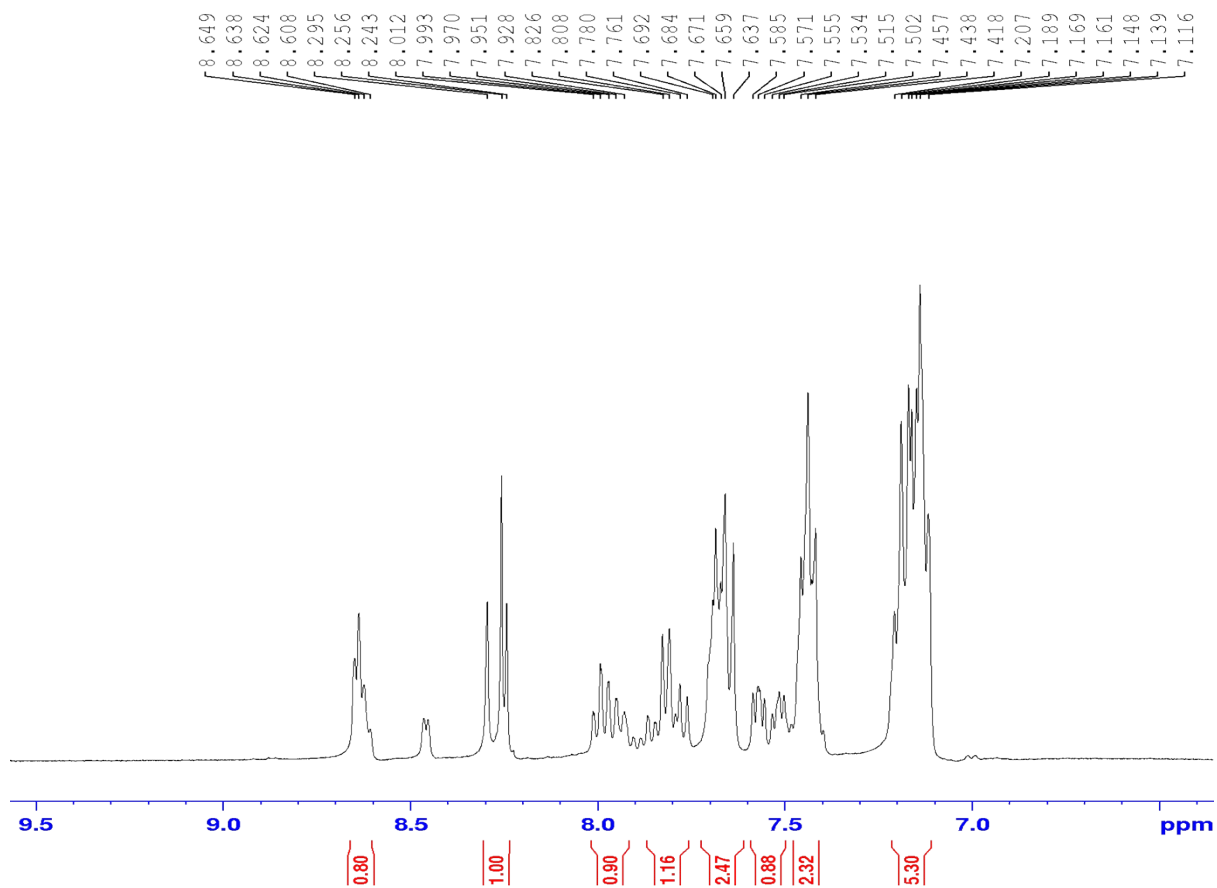

Figure 45. Aromatic region of the  $^1\text{H}$  NMR spectrum for **12h**

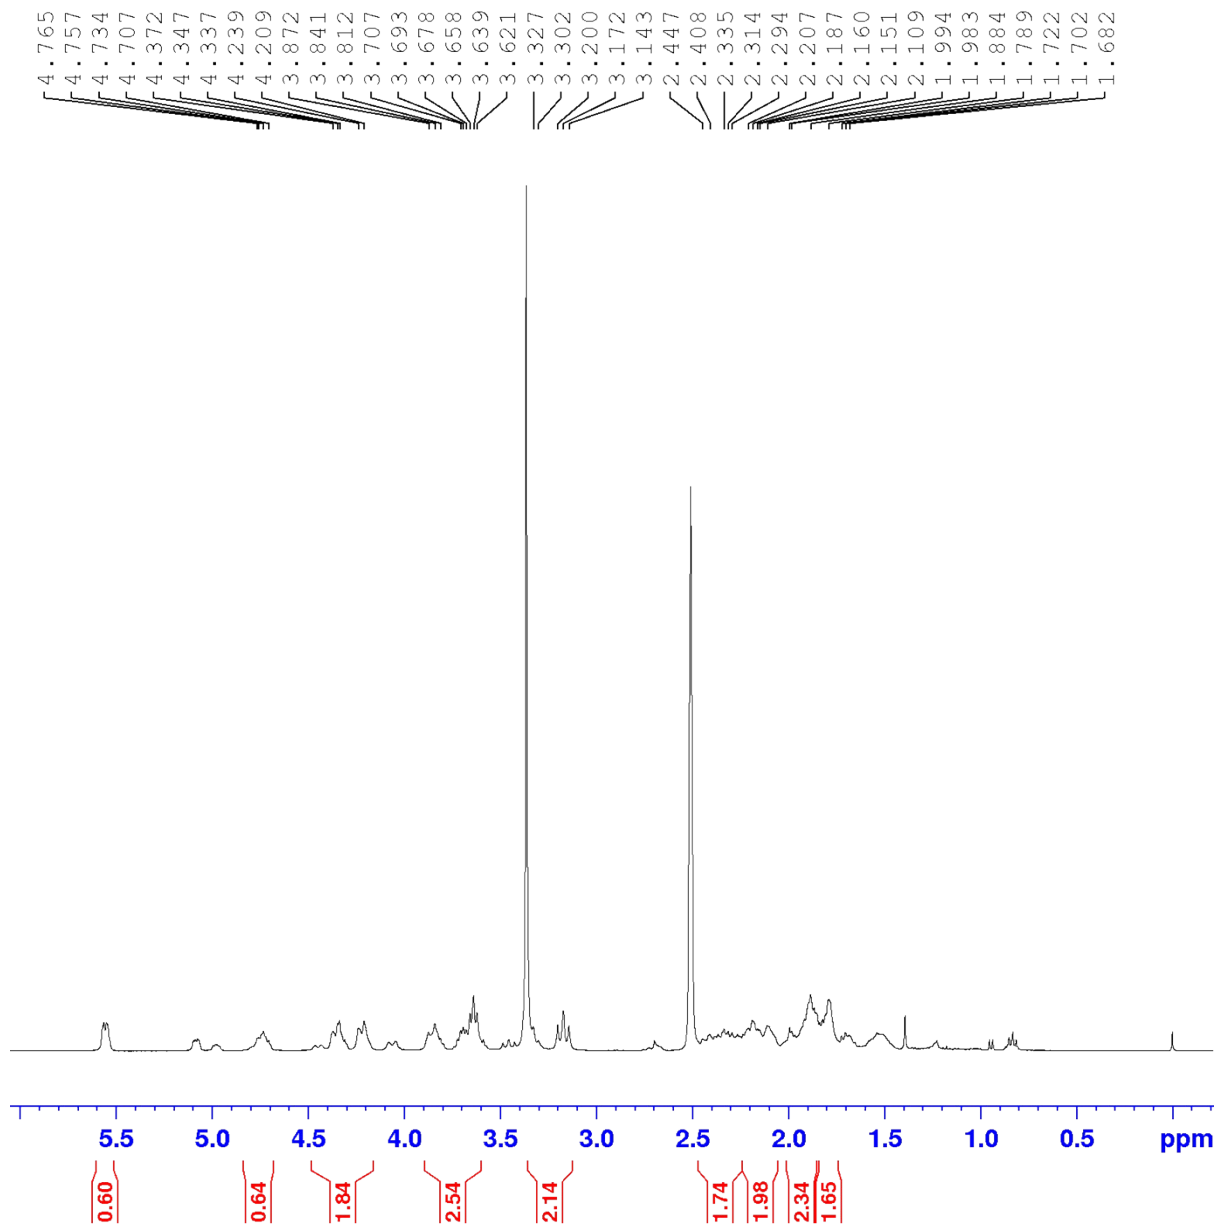

Figure 46. Aliphatic region of the  $^1\text{H}$  NMR spectrum for **12h**

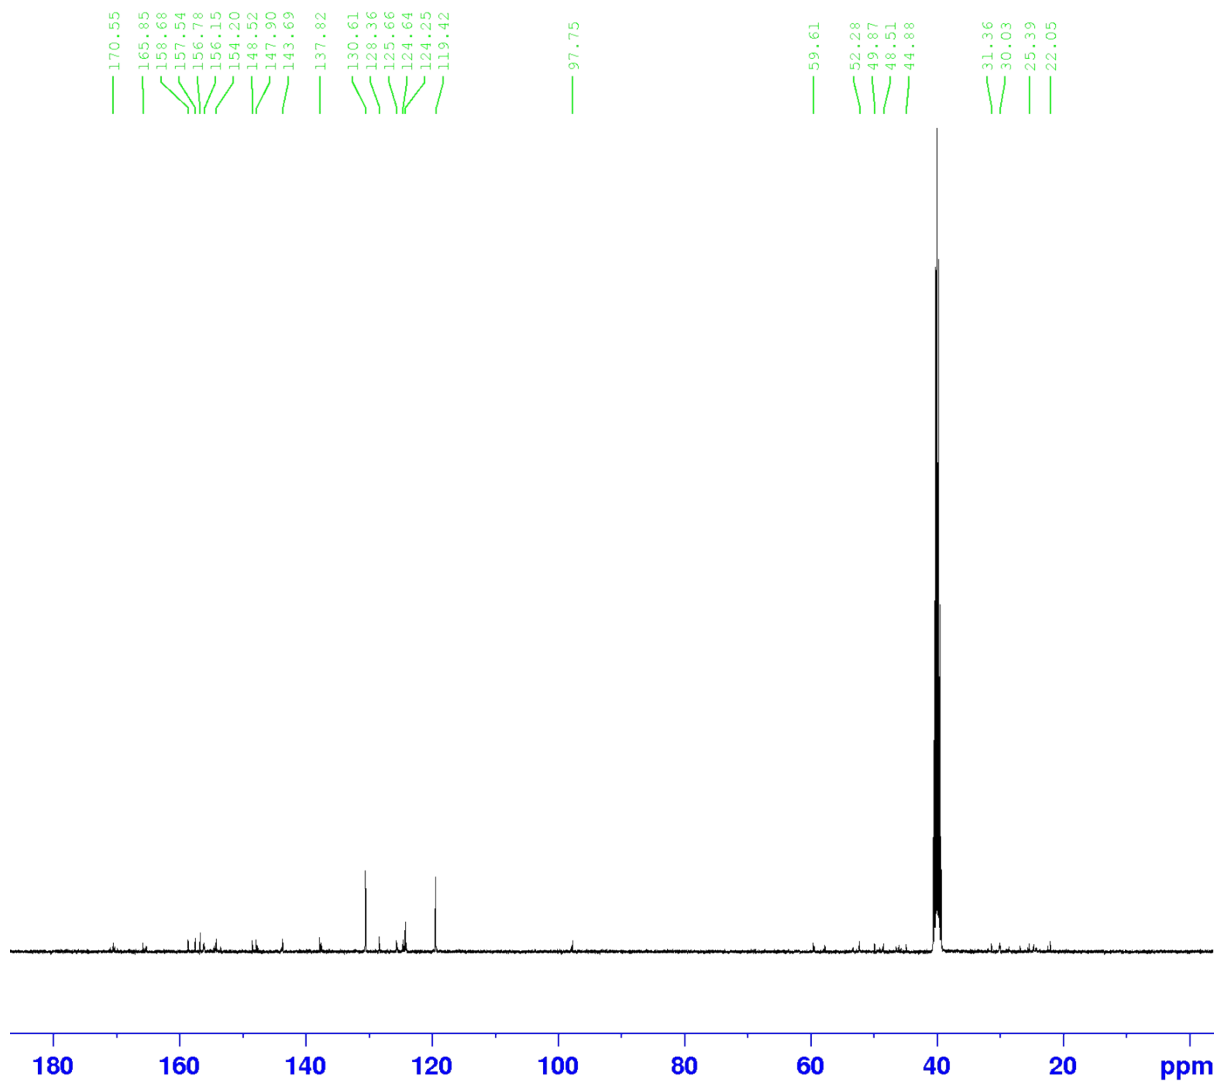

Figure 47.  $^{13}\text{C}$ -NMR spectrum of **12h**

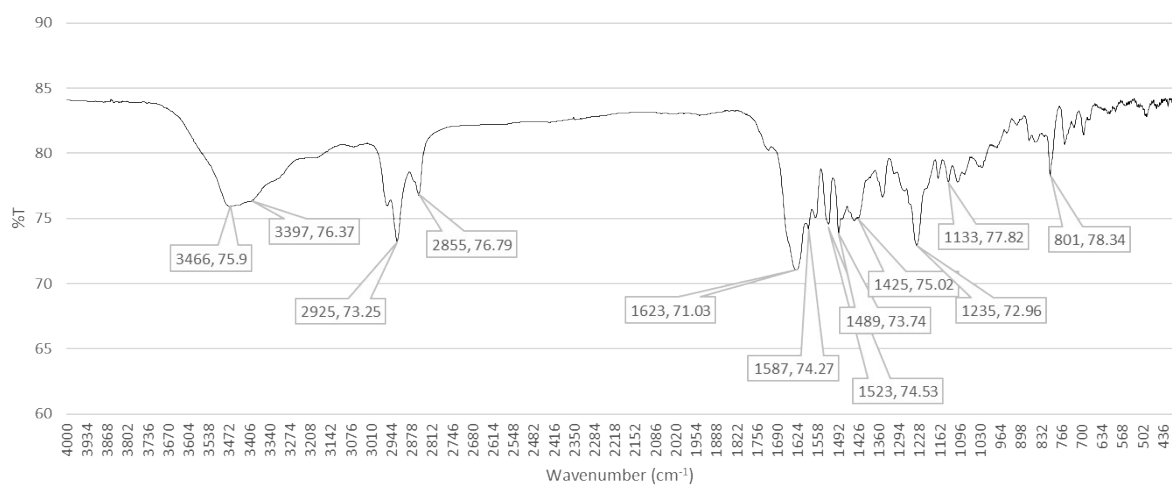

Figure 48. FT-IR spectrum of **12h**

Spectral data of *4-amino-1-((3R)-1-((3-methyl-4-nitrobenzoyl)propyl)piperidin-3-yl)-3-(4-phenoxyphenyl)-1H-pyrazolo[3,4-d]pyrimidine (12i)*

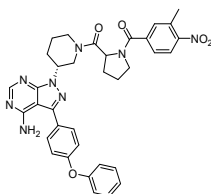

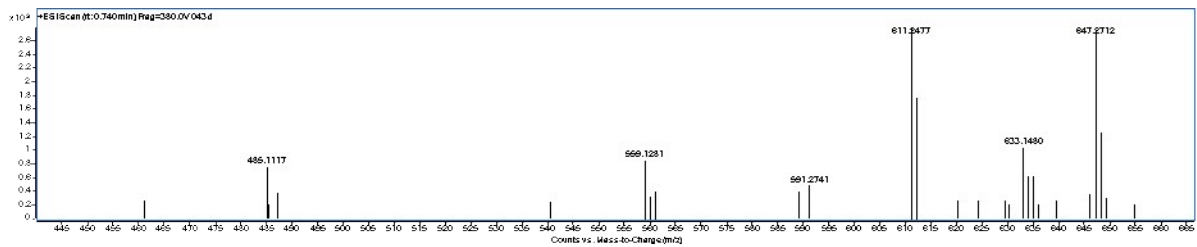

Figure 49. HRMS spectrum of **12i**

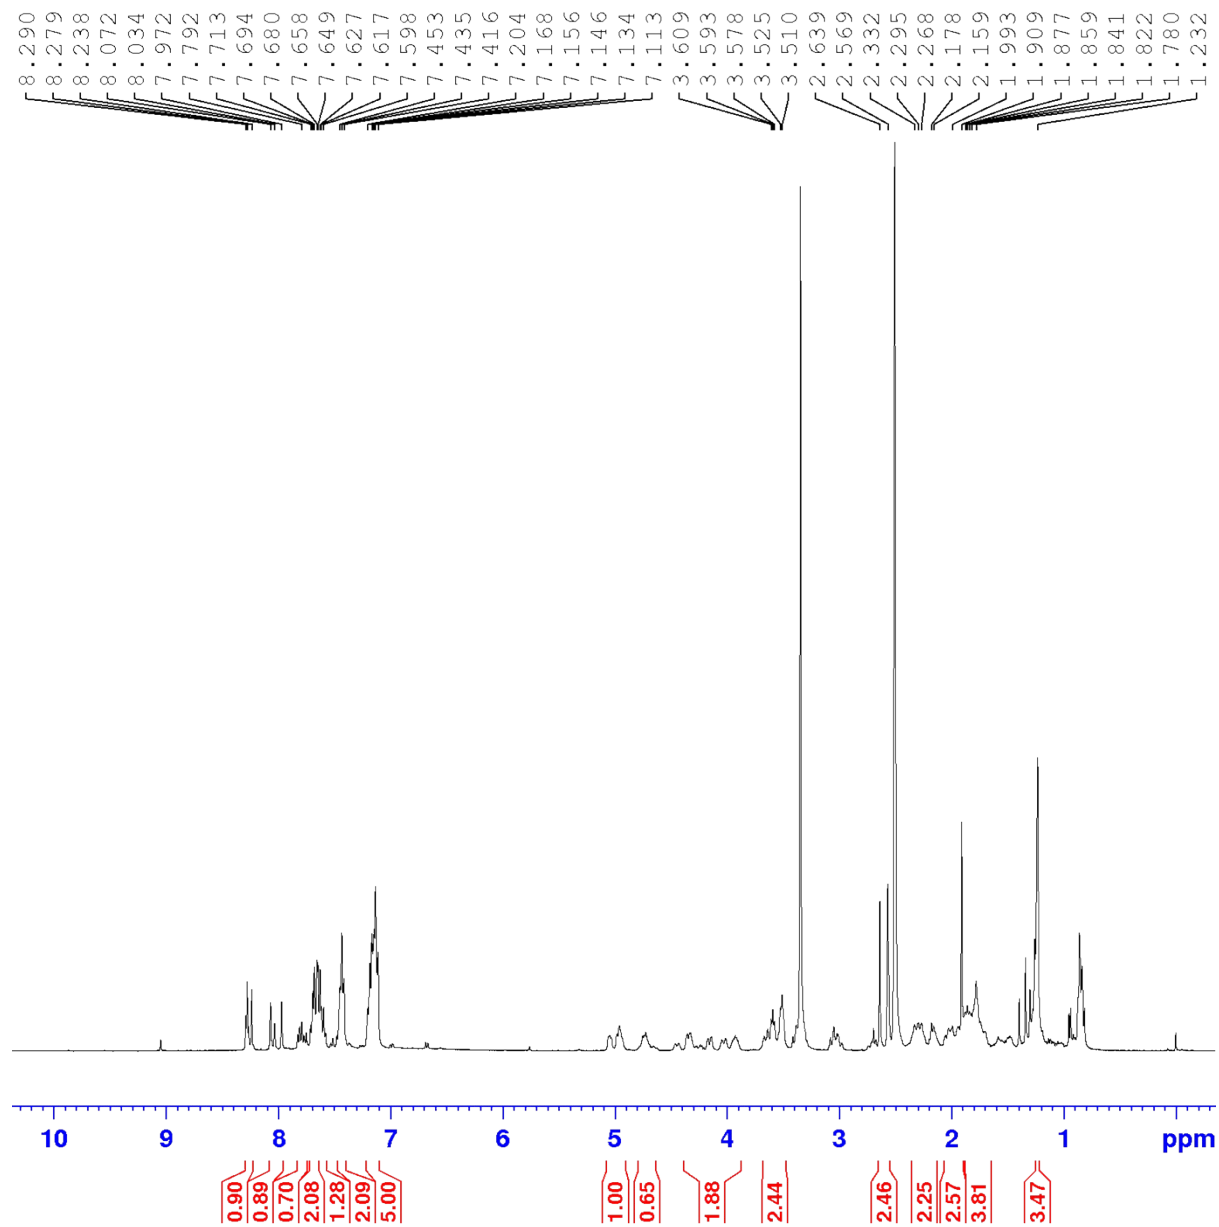

Figure 50. <sup>1</sup>H NMR full spectrum of **12i**

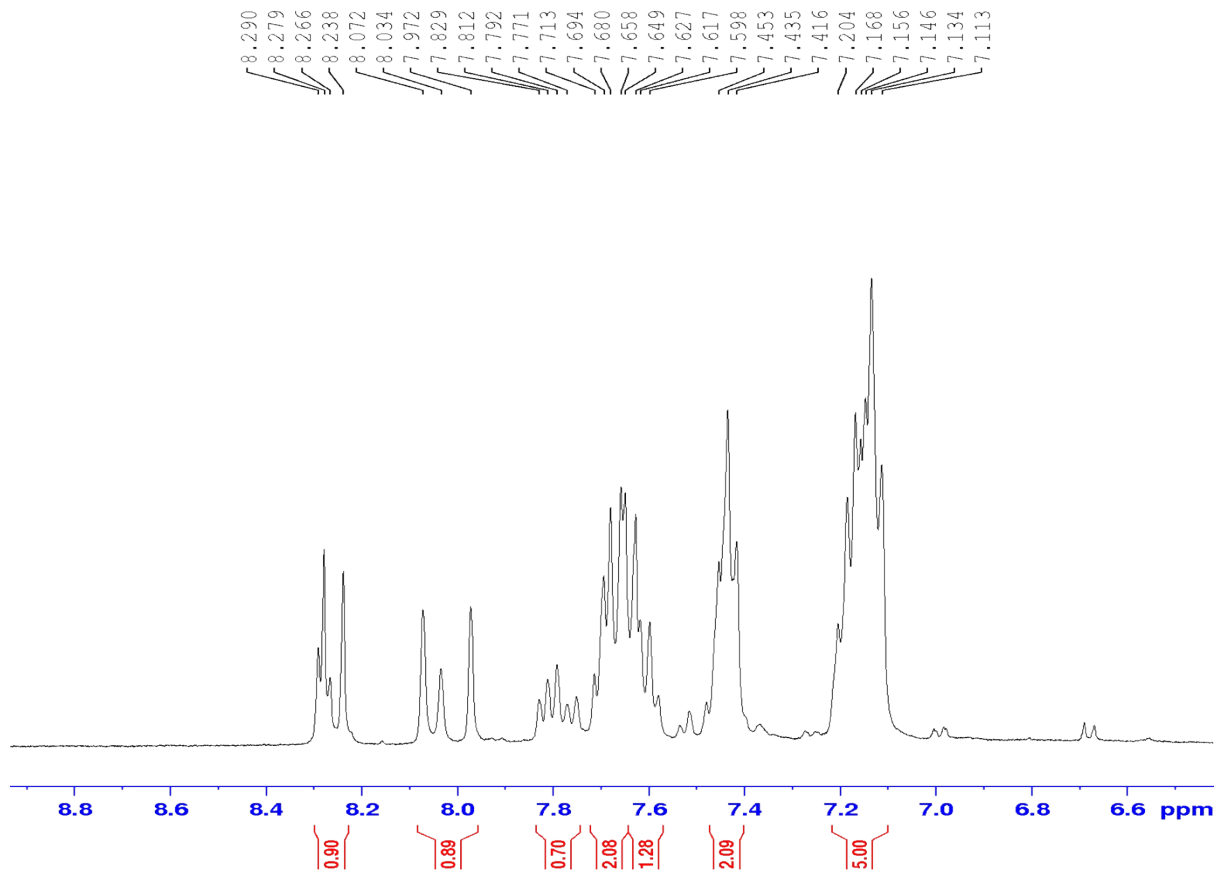

Figure 51. Aromatic region of the <sup>1</sup>H NMR spectrum for **12i**

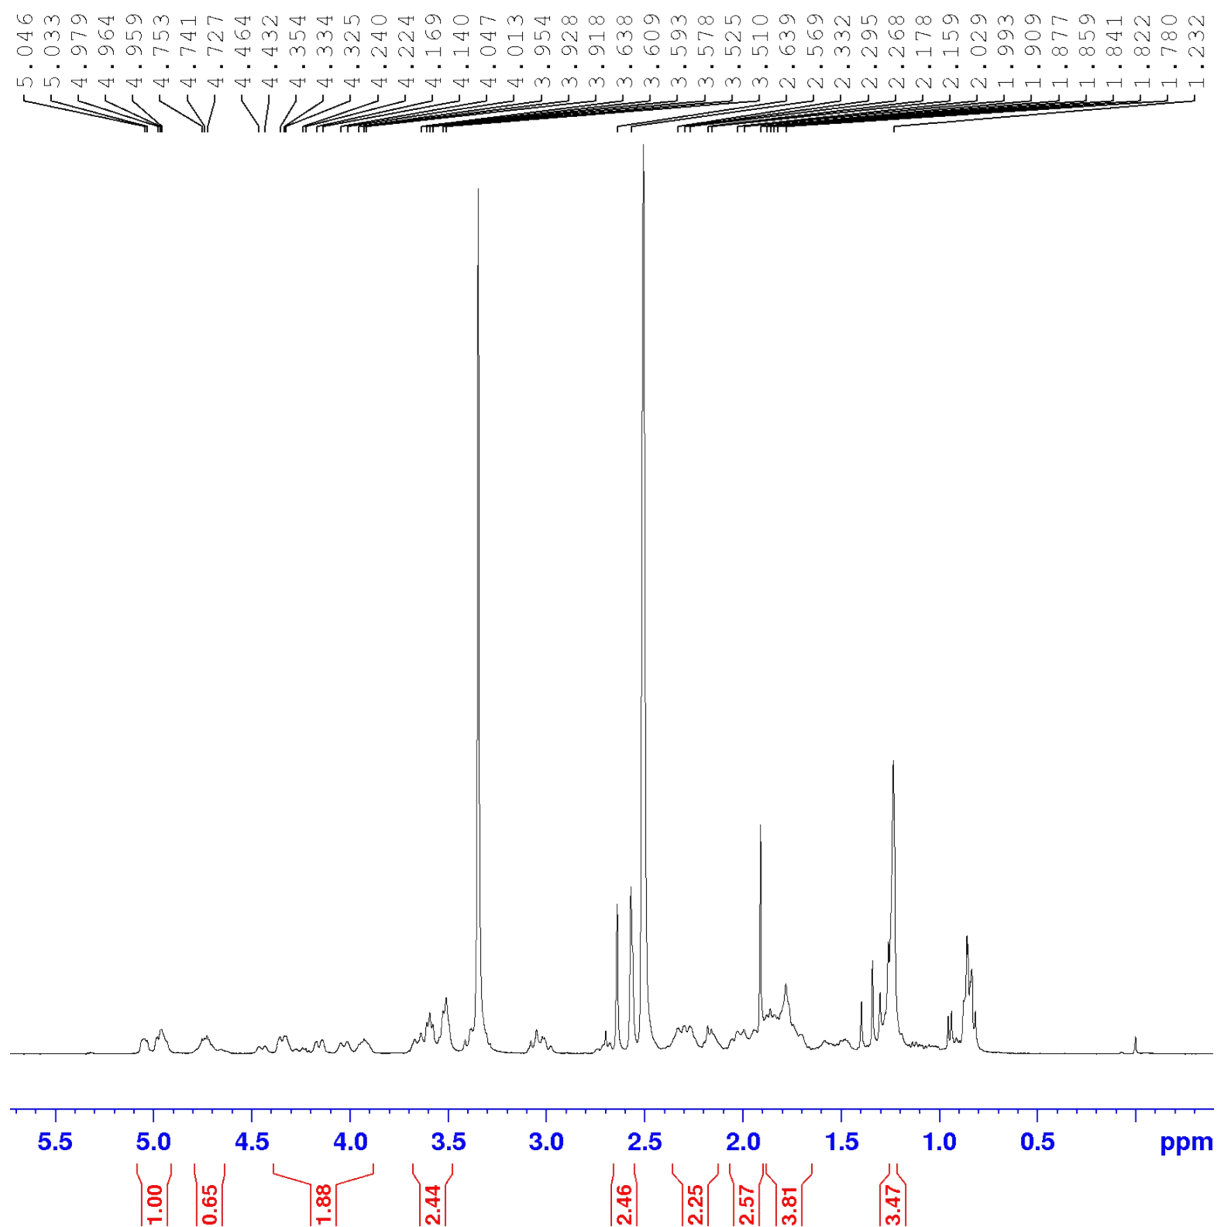

Figure 52. Aliphatic region of the  $^1\text{H}$  NMR spectrum for **12i**

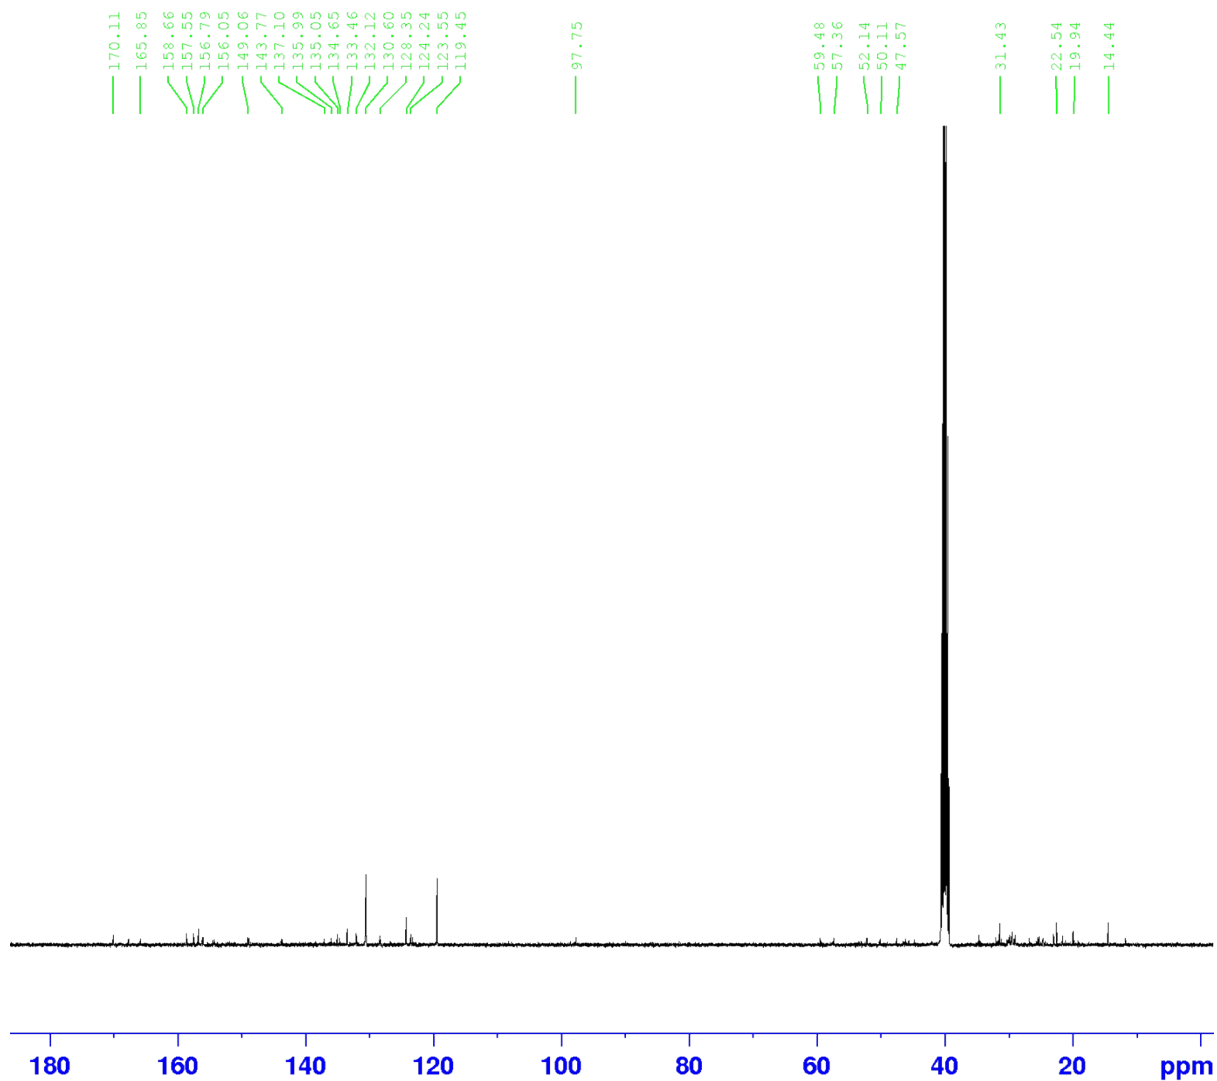

Figure 53.  $^{13}\text{C}$ -NMR spectrum of **12i**

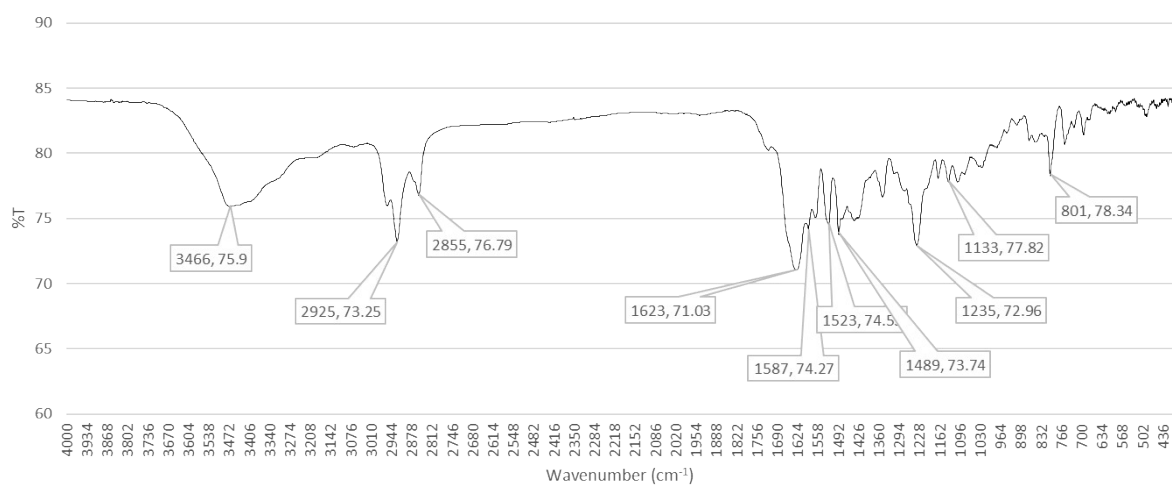

Figure 54. FT-IR spectrum of **12i**

Spectral data of *4-amino-1-((3*R*)-1-((4-chlorobenzoyl)propyl)piperidin-3-yl)-3-(4-phenoxyphenyl)-1*H*-pyrazolo[3,4-*d*]pyrimidine (12j)*

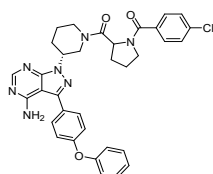



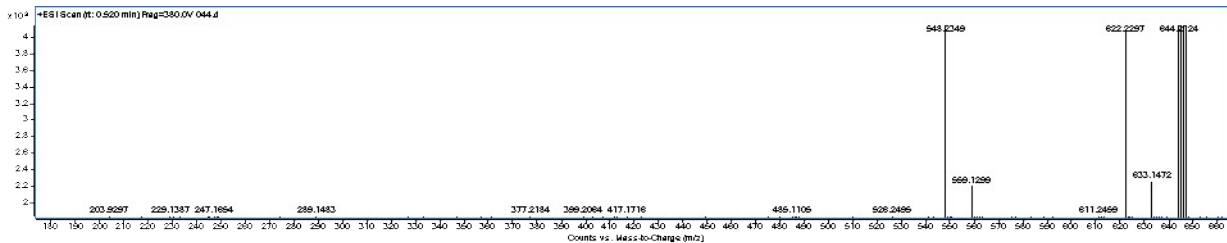

Figure 55. HRMS spectrum of **12j**

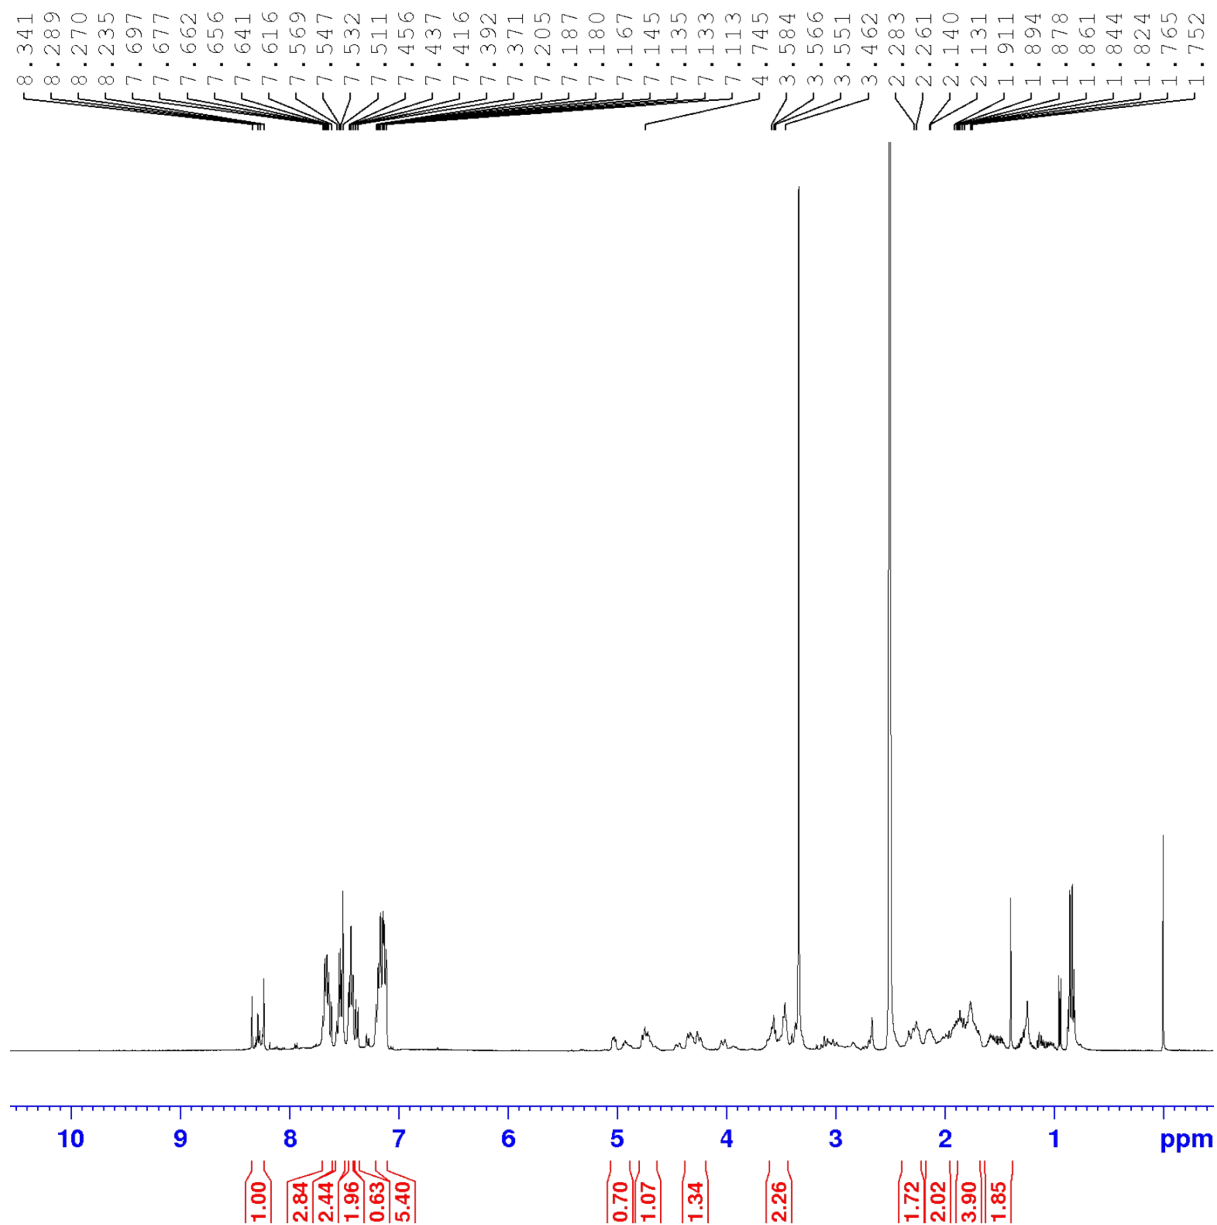

Figure 56. <sup>1</sup>H NMR full spectrum of **12j**

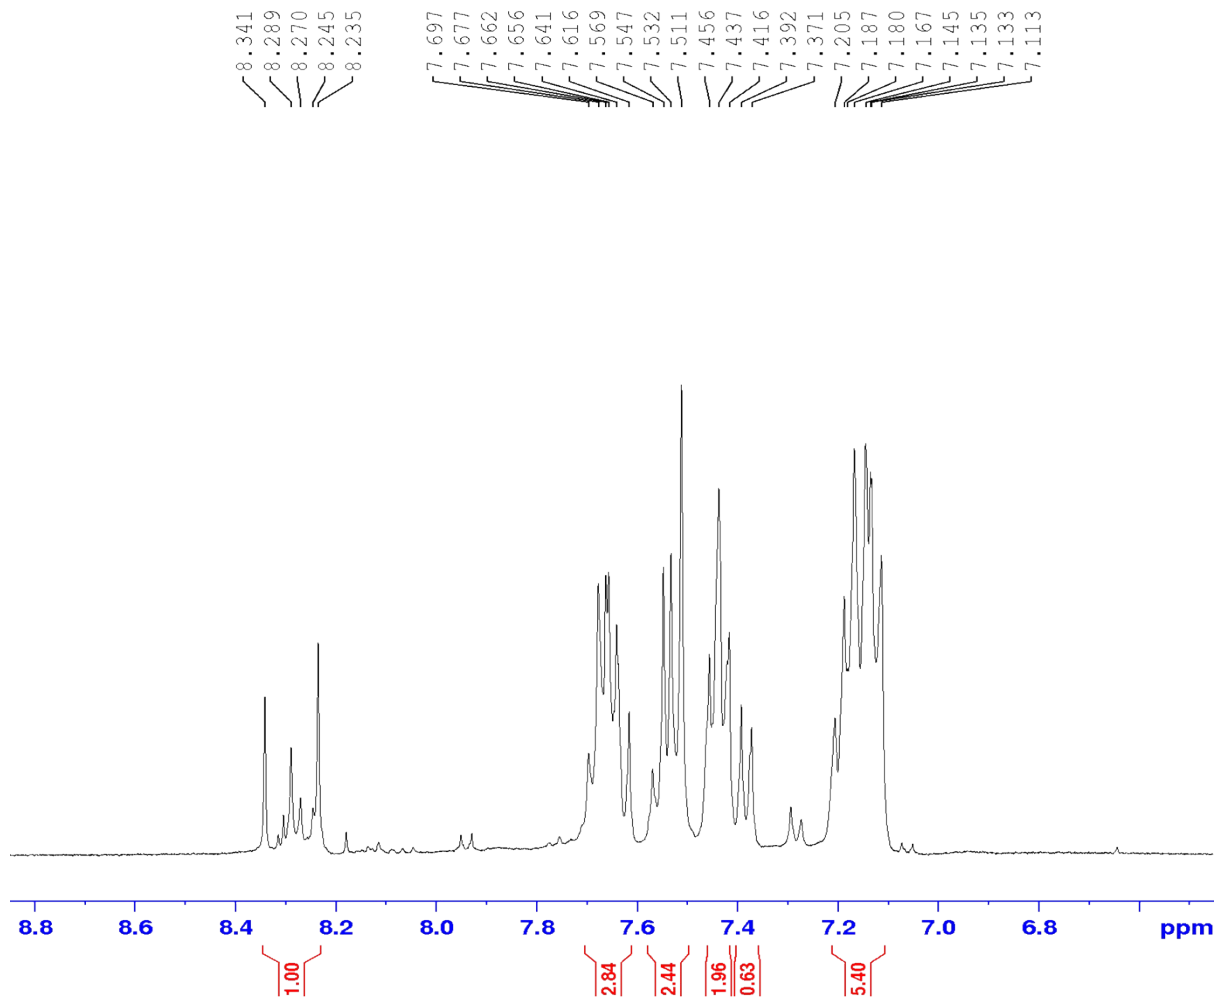

Figure 57. Aromatic region of the  $^1\text{H}$  NMR spectrum for **12j**

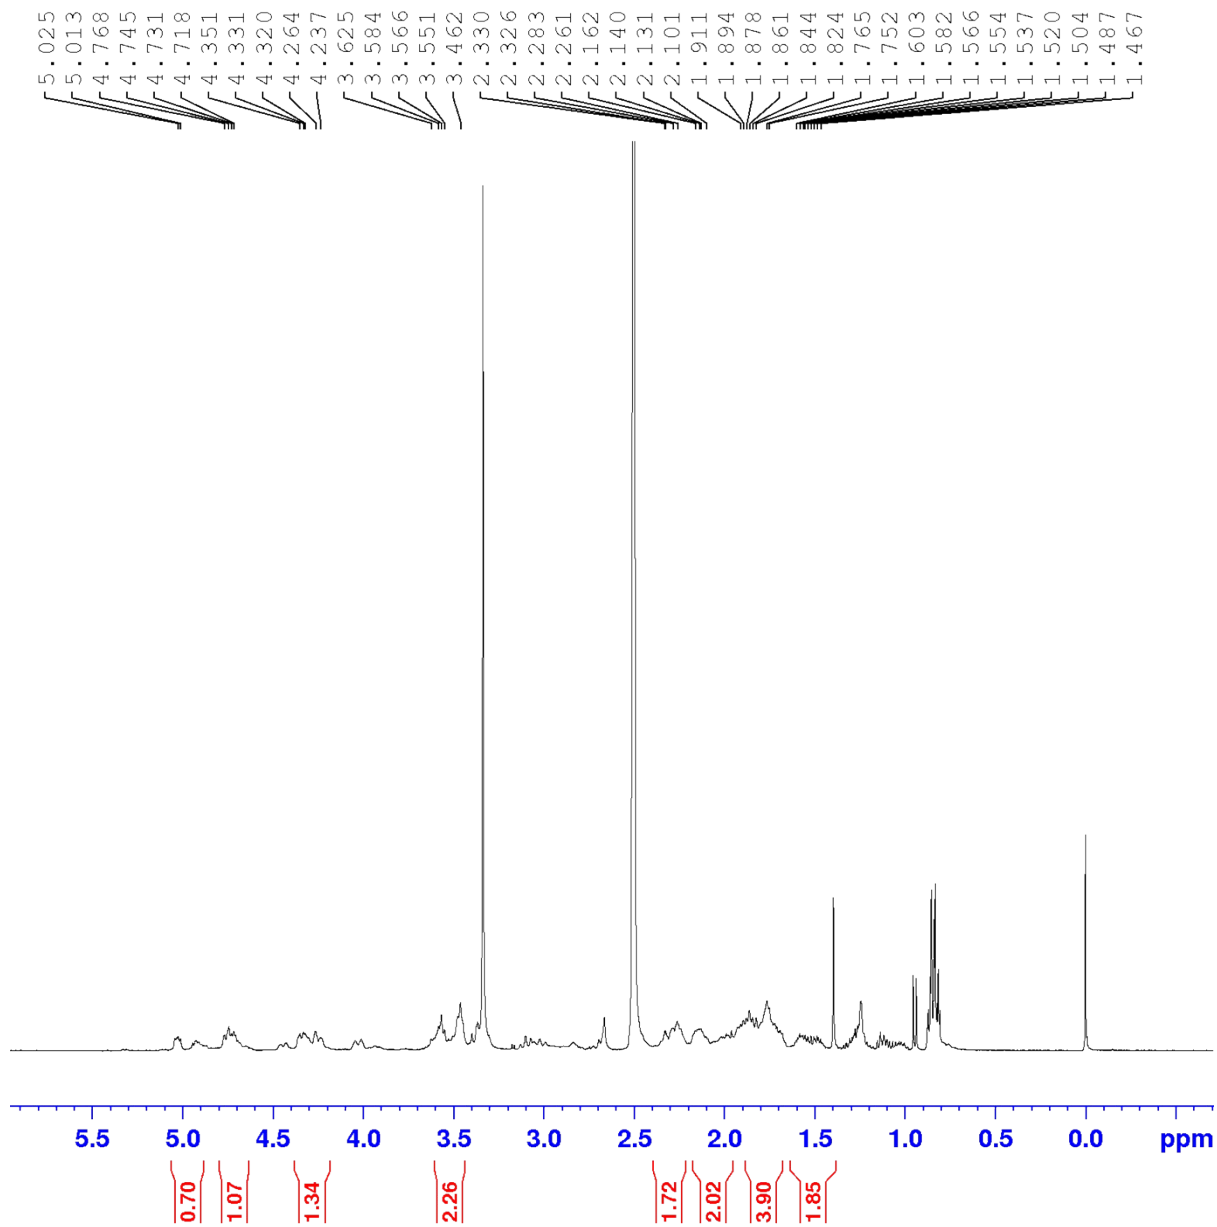

Figure 58. Aliphatic region of the  $^1\text{H}$  NMR spectrum for **12j**

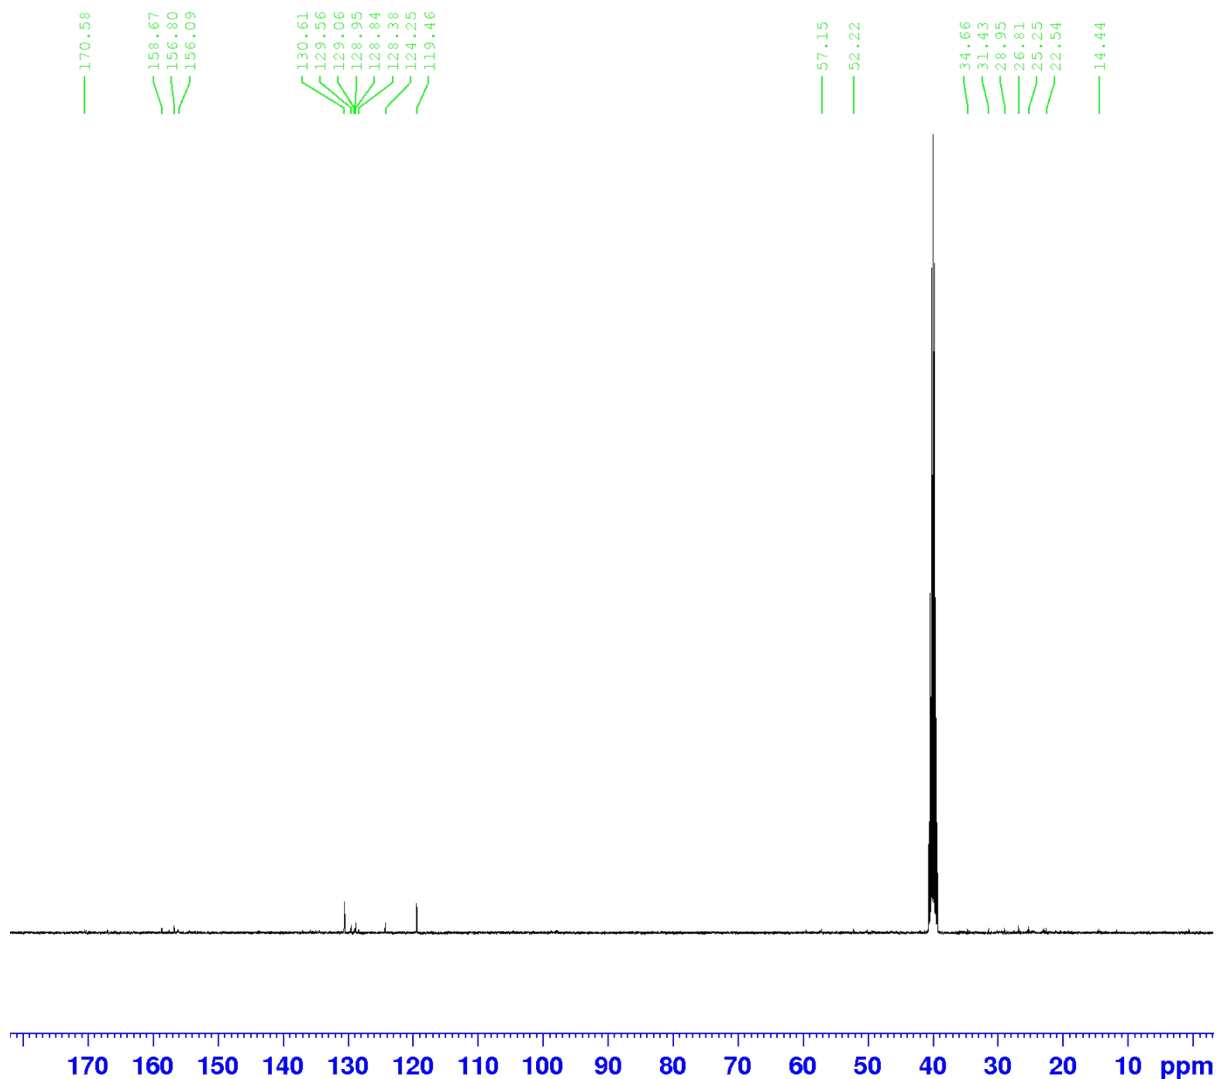

Figure 59.  $^{13}\text{C}$ -NMR spectrum of **12j**

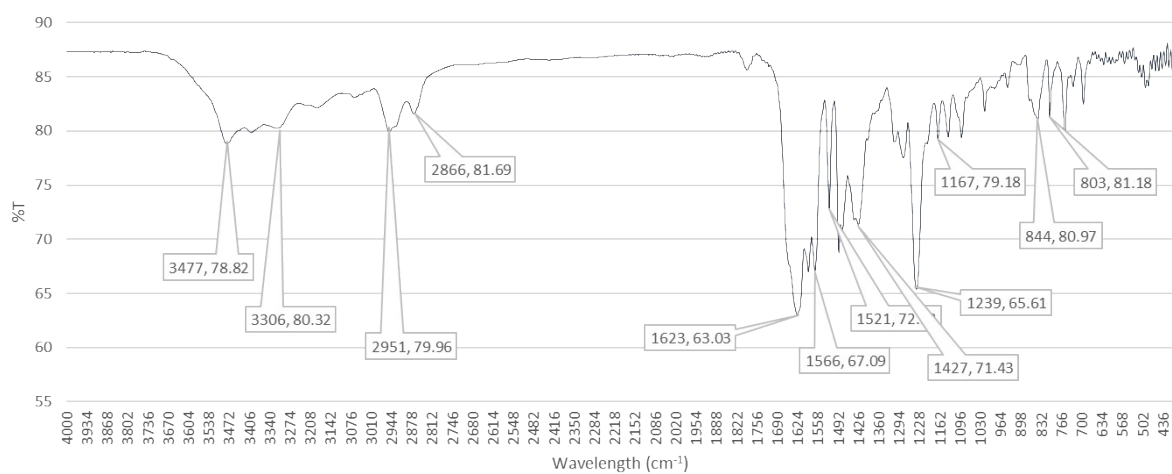

Figure 60. FT-IR spectrum of **12j**

Spectral data of *4-amino-1-((3R)-1-((3-nitrobenzoyl)propyl)piperidin-3-yl)-3-(4-phenoxyphenyl)-1H-pyrazolo[3,4-d]pyrimidine (12k)*

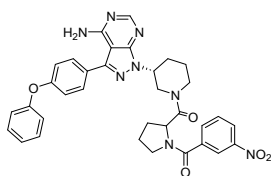

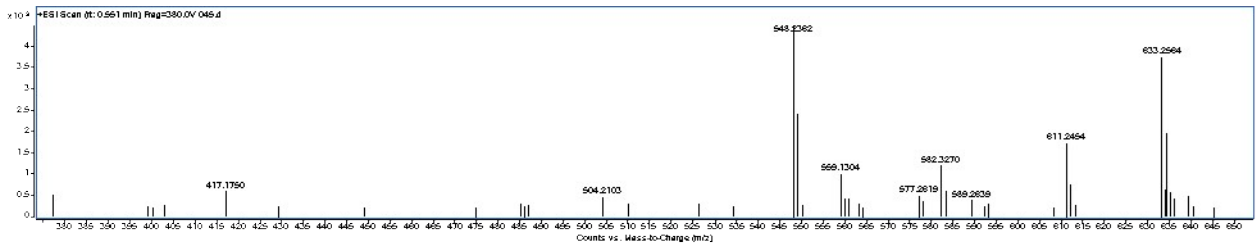

Figure 61. HRMS spectrum of **12k**

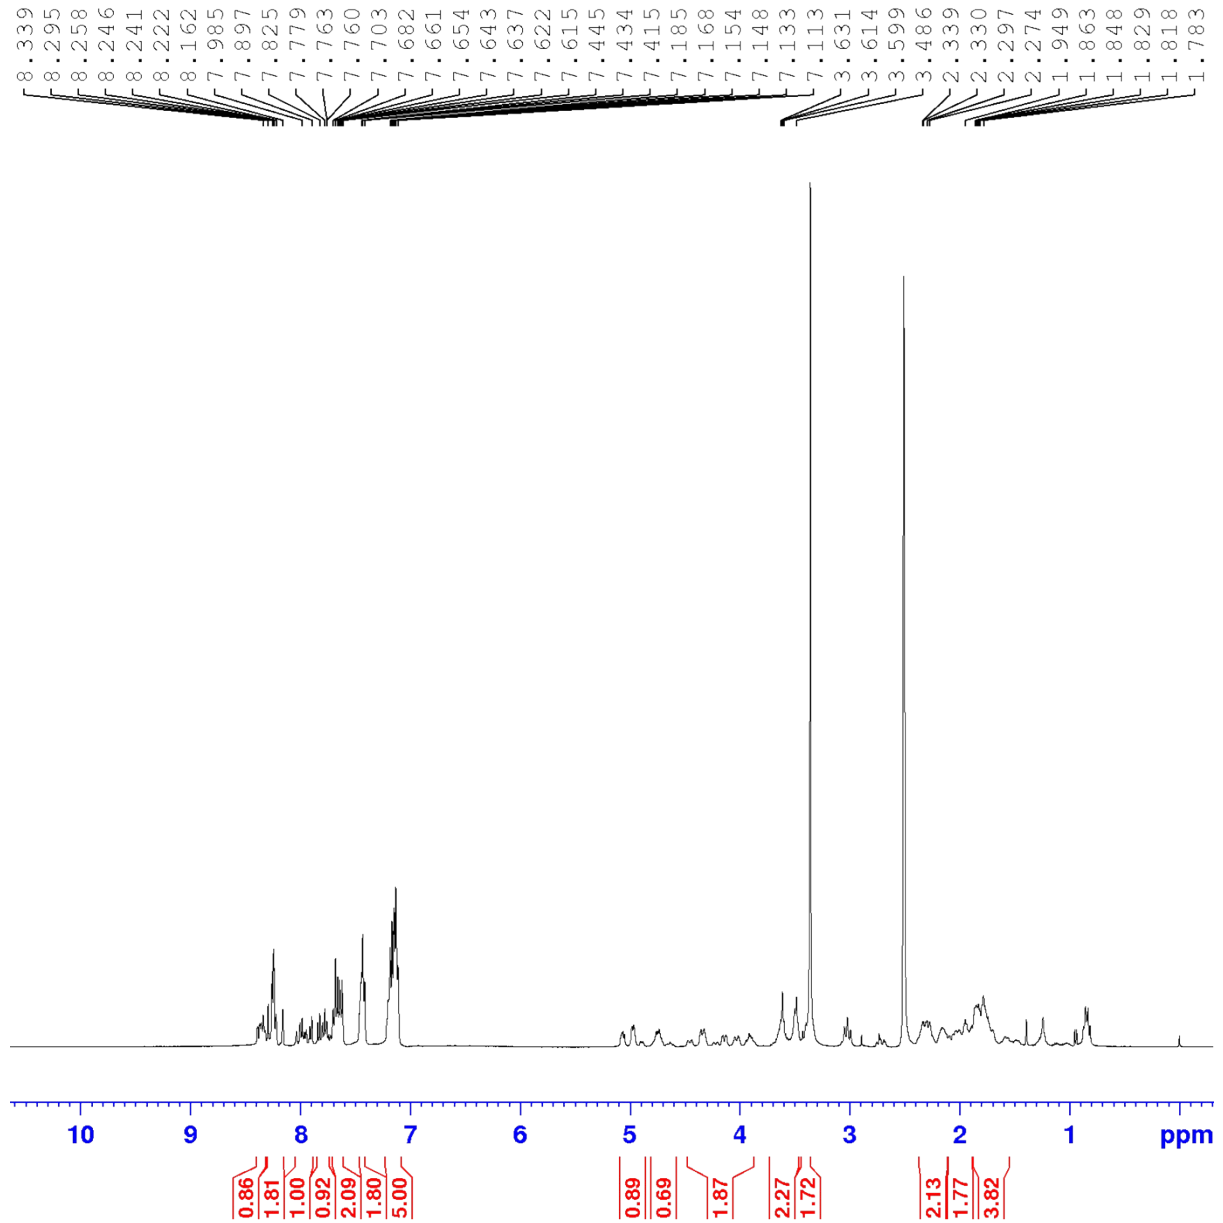

Figure 62. <sup>1</sup>H NMR full spectrum of **12k**

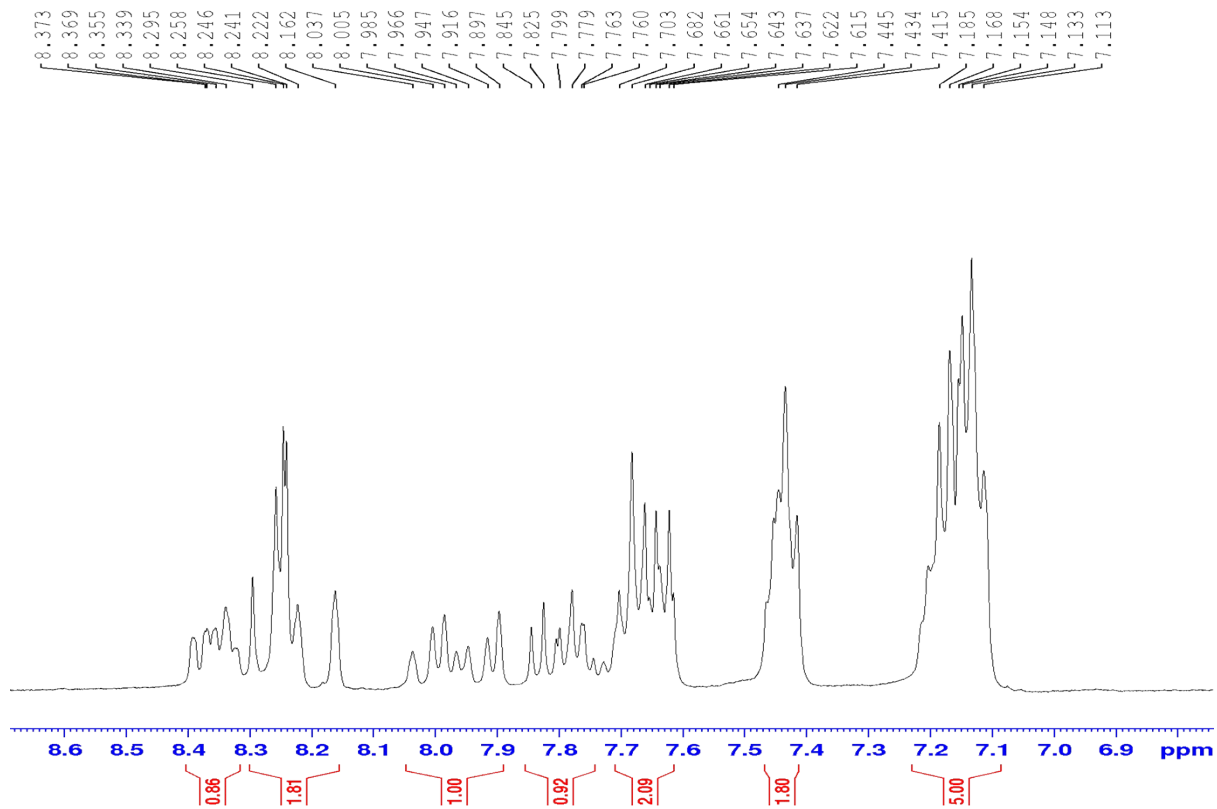

Figure 63. Aromatic region of the  $^1\text{H}$  NMR spectrum for **12k**

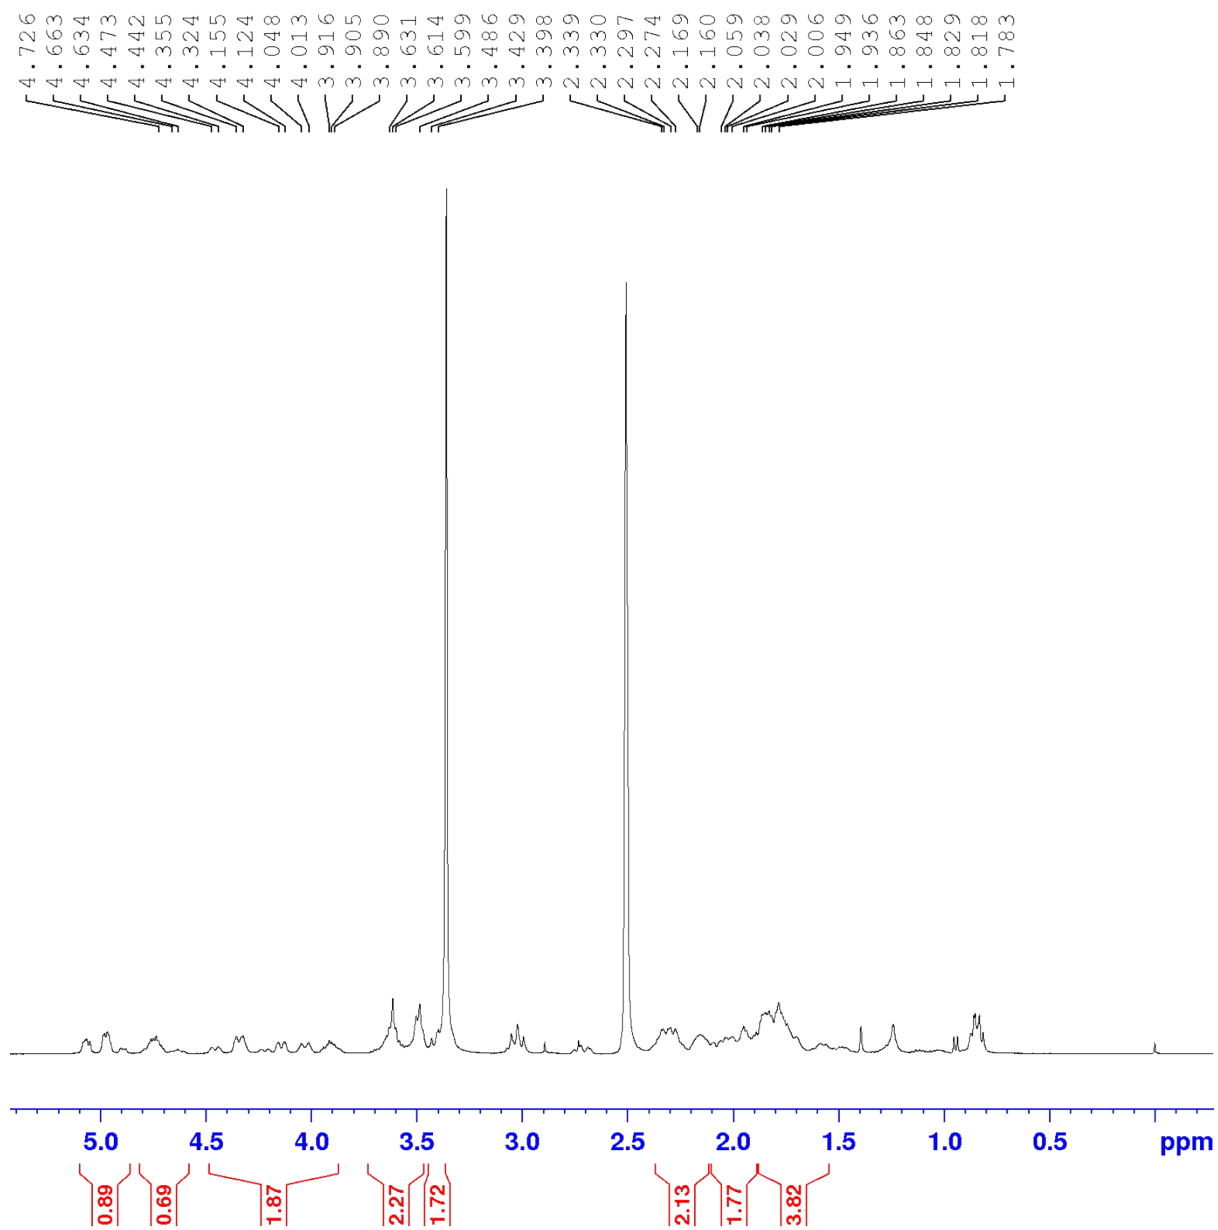

Figure 64. Aliphatic region of the  $^1\text{H}$  NMR spectrum for **12k**

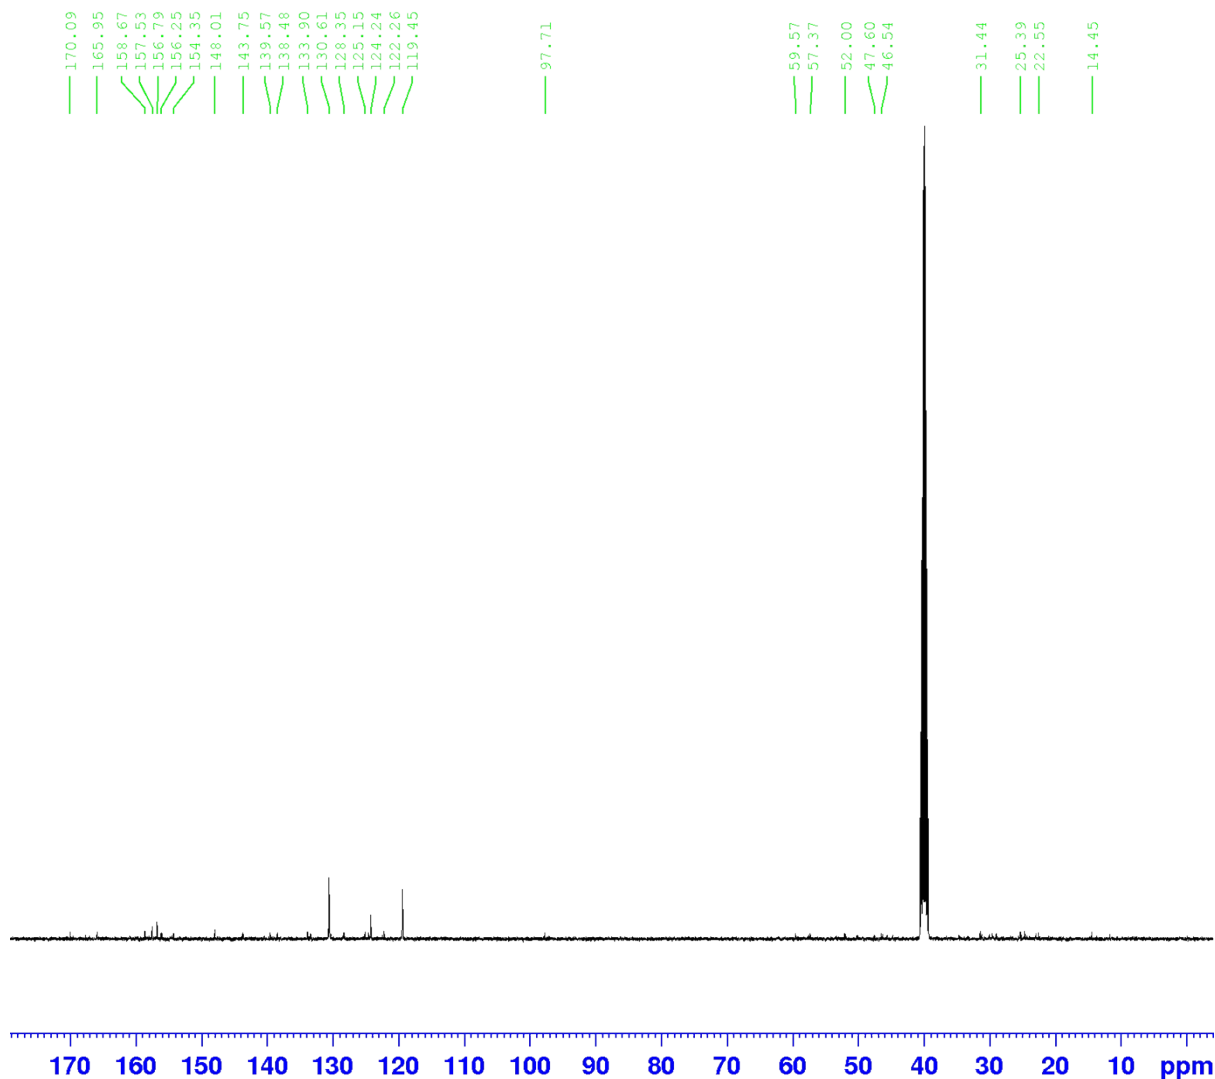

Figure 65.  $^{13}\text{C}$ -NMR spectrum of **12k**

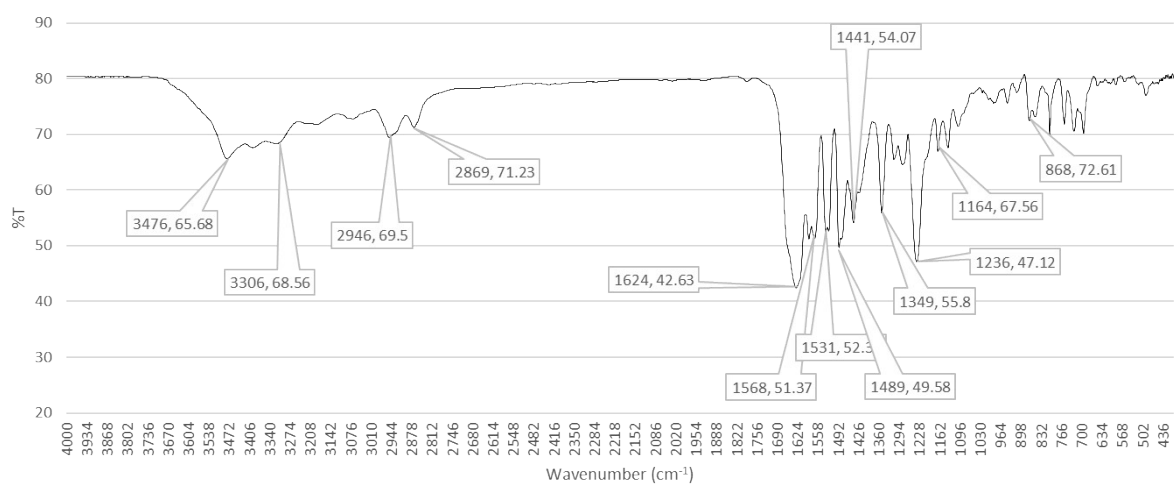

Figure 66. FT-IR spectrum of **12k**

Spectral data of *4-(2-((R)-3-(4-amino-3-(4-phenoxyphenyl)-1H-pyrazolo[3,4-d]pyrimidin-1-yl)piperidine-1-carbonyl)pyrrolidine-1-carbonyl)phenyl acetate (12l)*

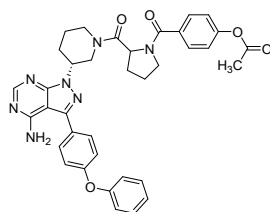



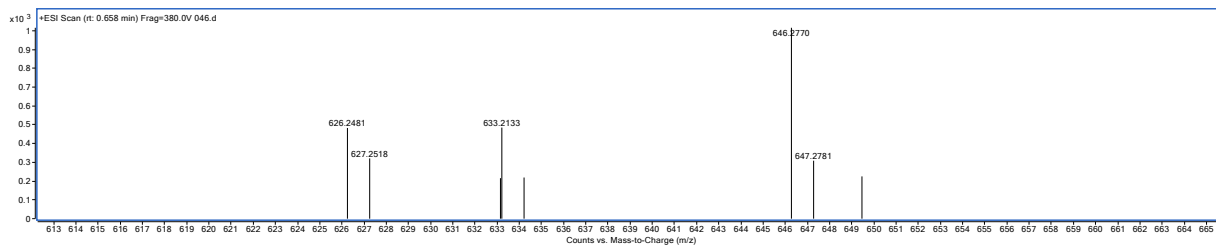

Figure 67. HRMS spectrum of **12I**

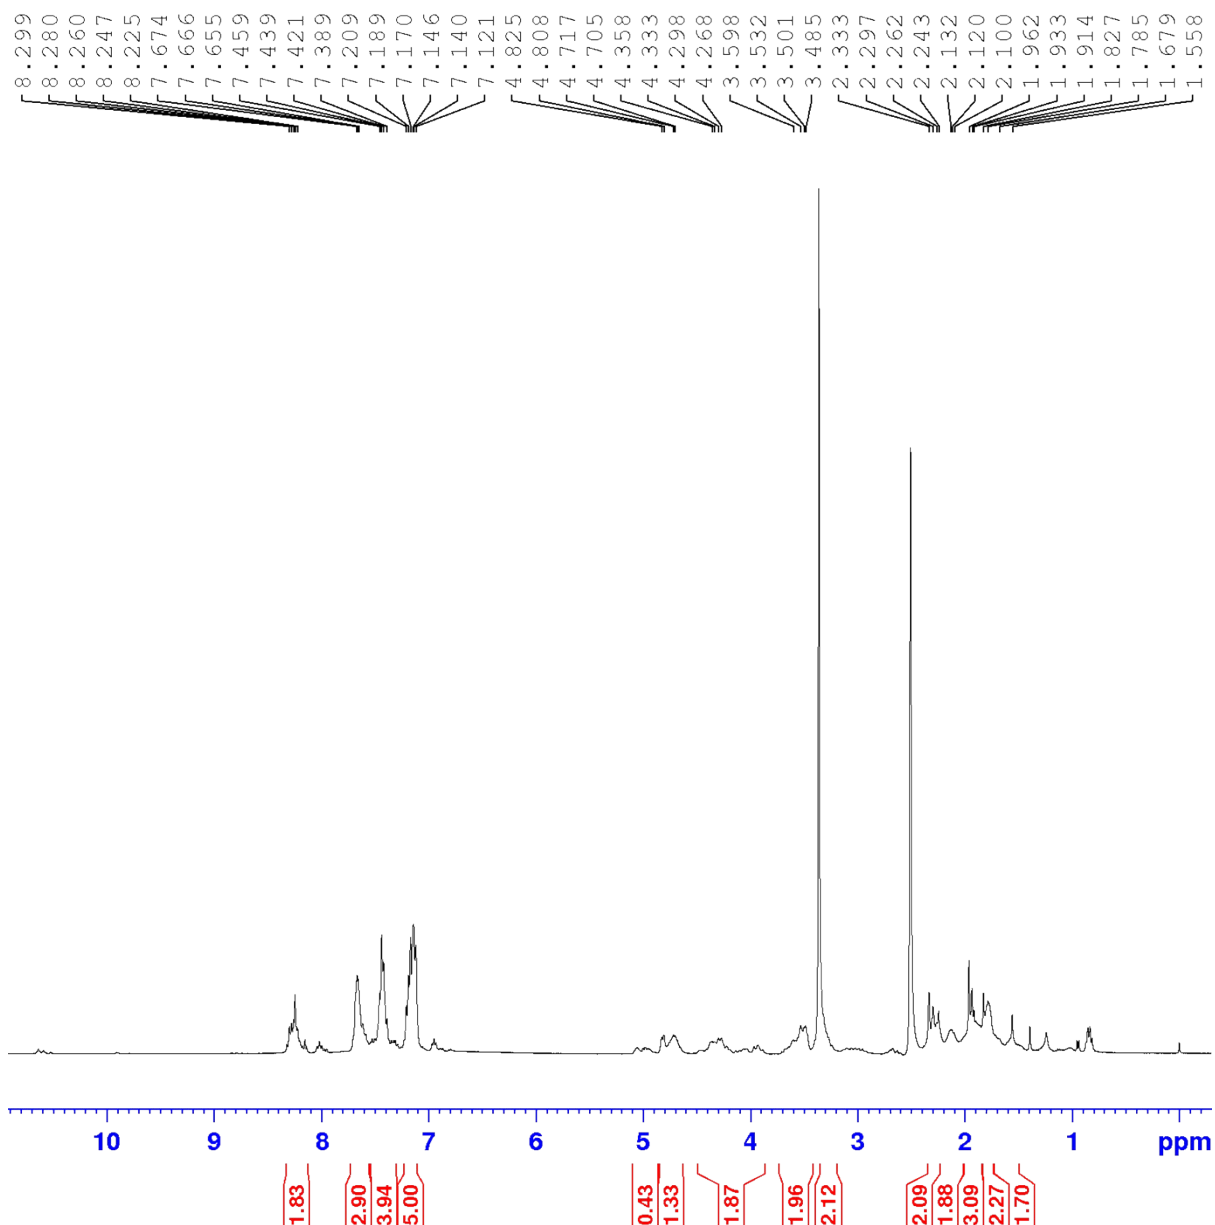

Figure 68. <sup>1</sup>H NMR full spectrum of **12I**

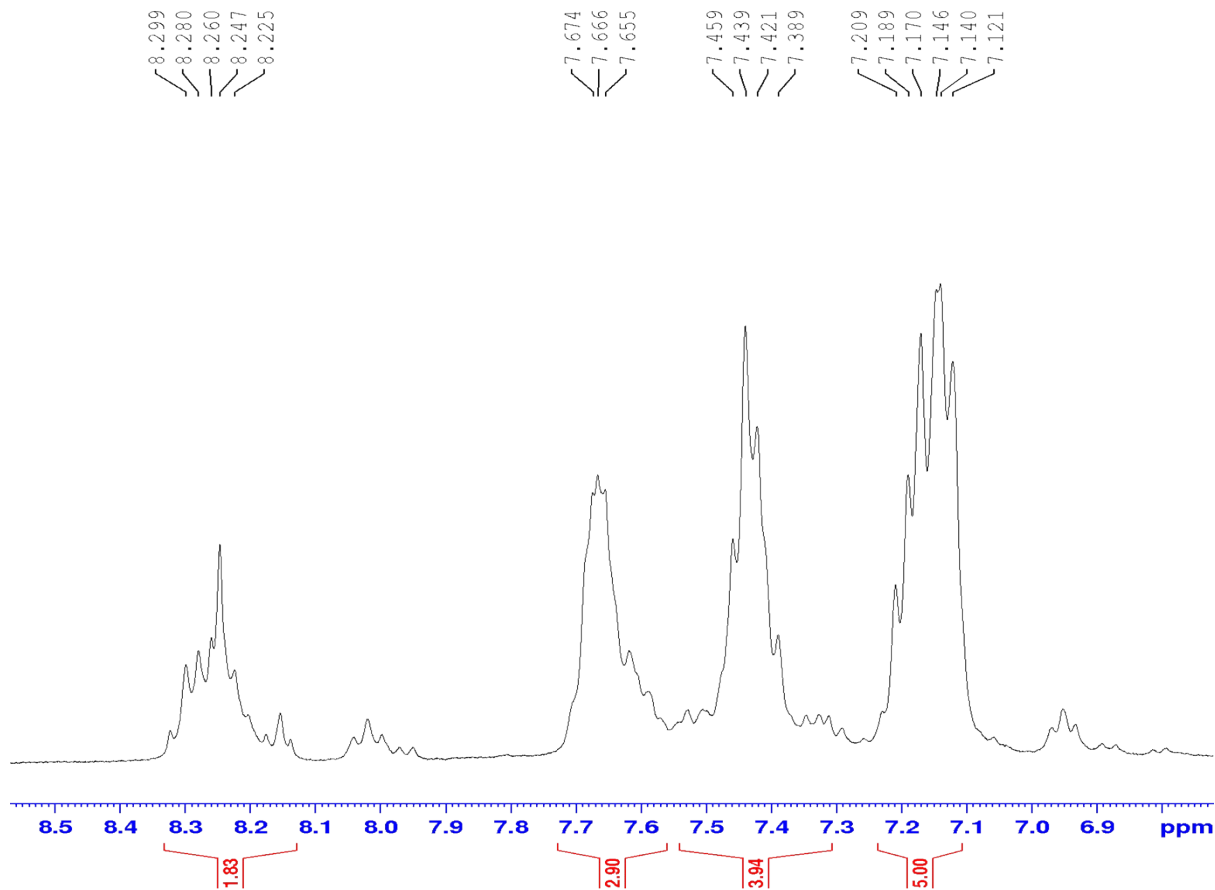

Figure 69. Aromatic region of the  $^1\text{H}$  NMR spectrum for **121**

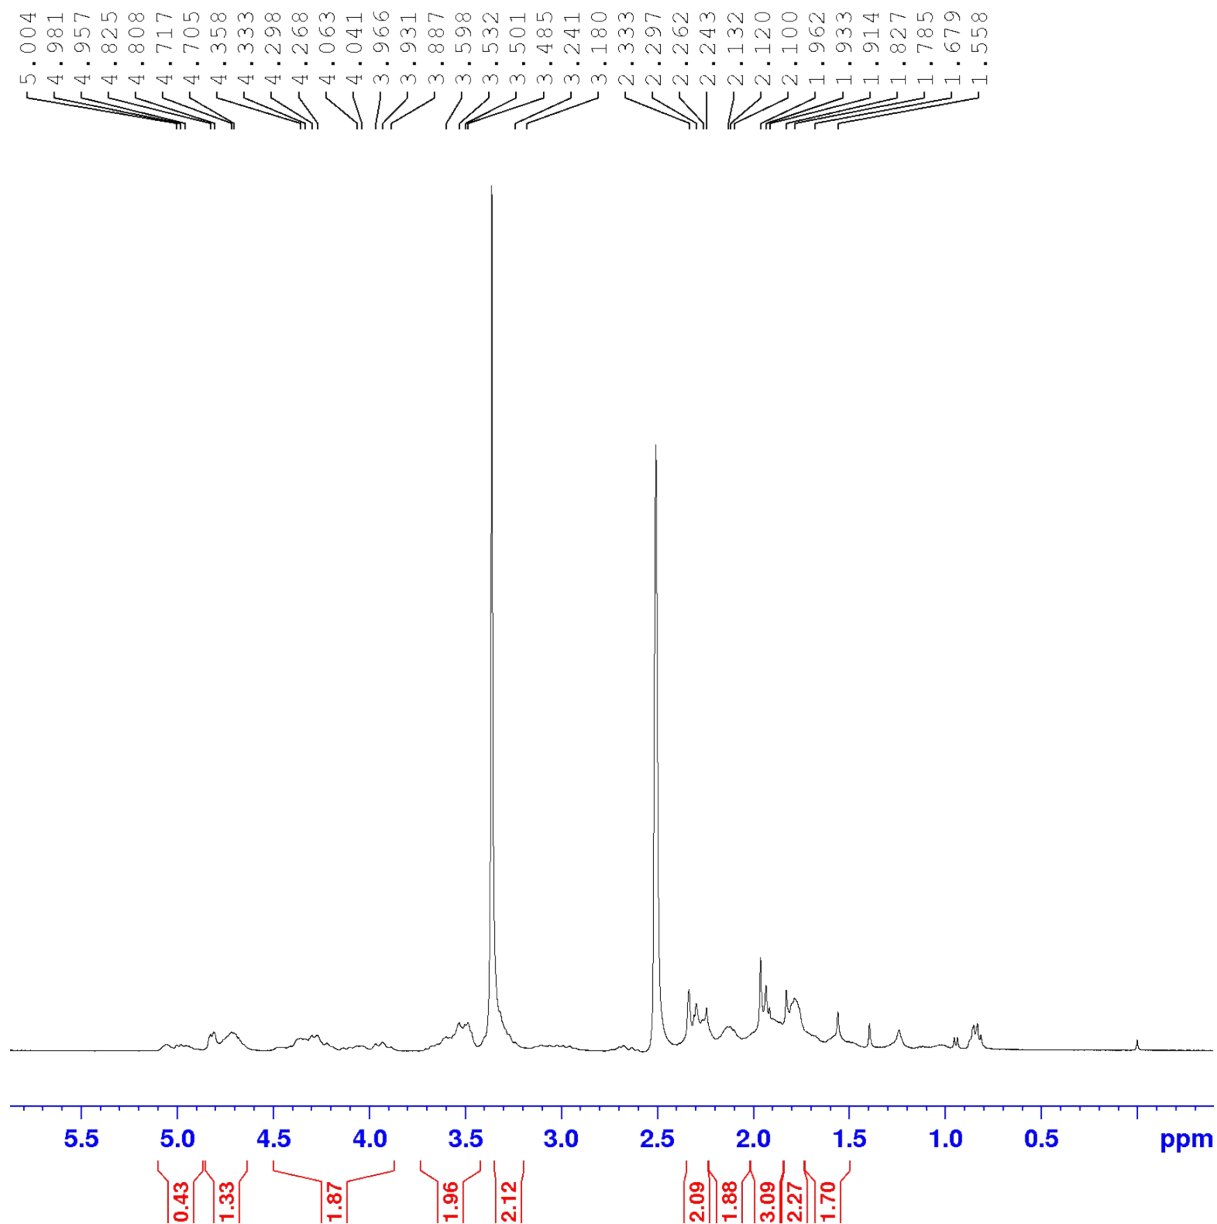

Figure 70. Aliphatic region of the  $^1\text{H}$  NMR spectrum for **121**

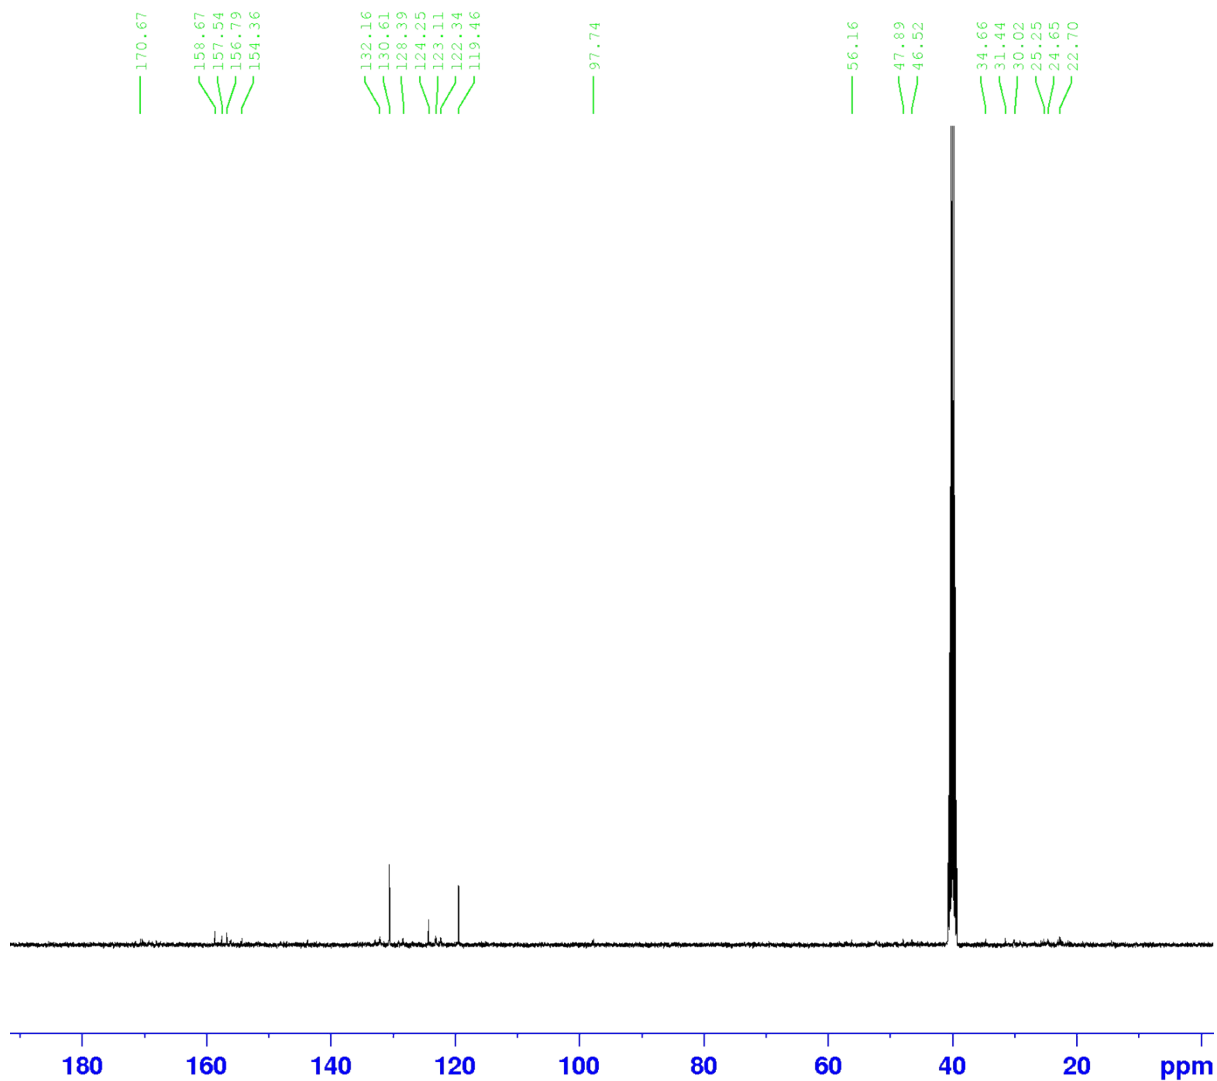

Figure 71.  $^{13}\text{C}$ -NMR spectrum of **12l**

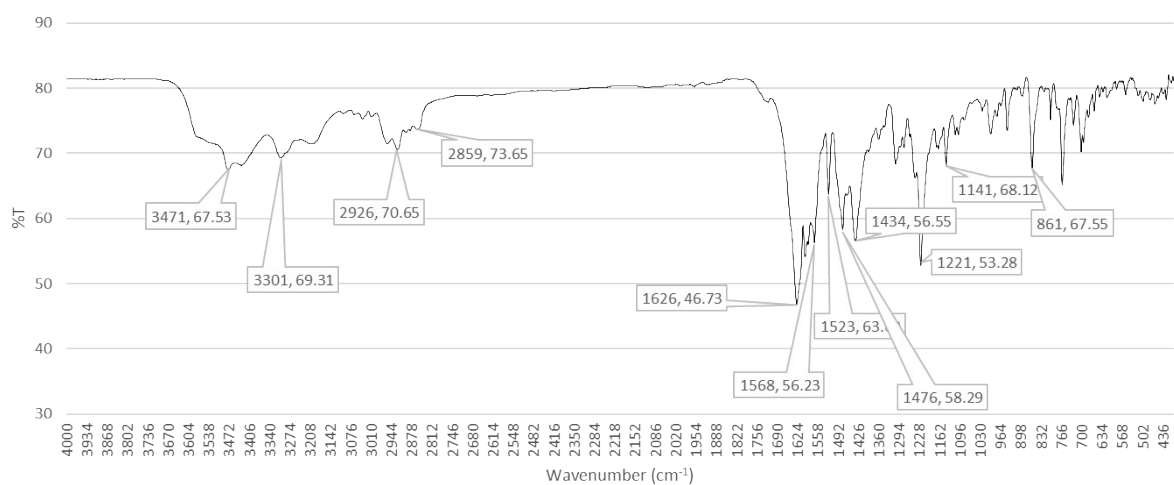

Figure 72. FT-IR spectrum of **12l**

Spectral data of *4-amino-1-((3R)-1-((4-bromo-3-(trifluoromethyl)benzoyl)propyl)piperidin-3-yl)-3-(4-phenoxyphenyl)-1H-pyrazolo[3,4-d]pyrimidine (12m)*

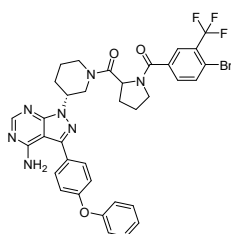

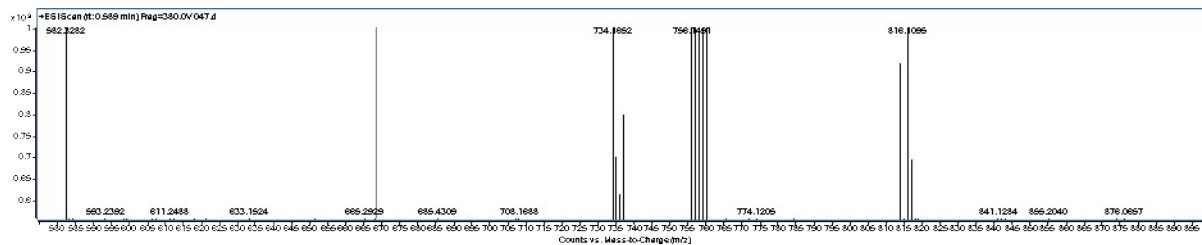

Figure 73. HRMS spectrum of **12m**

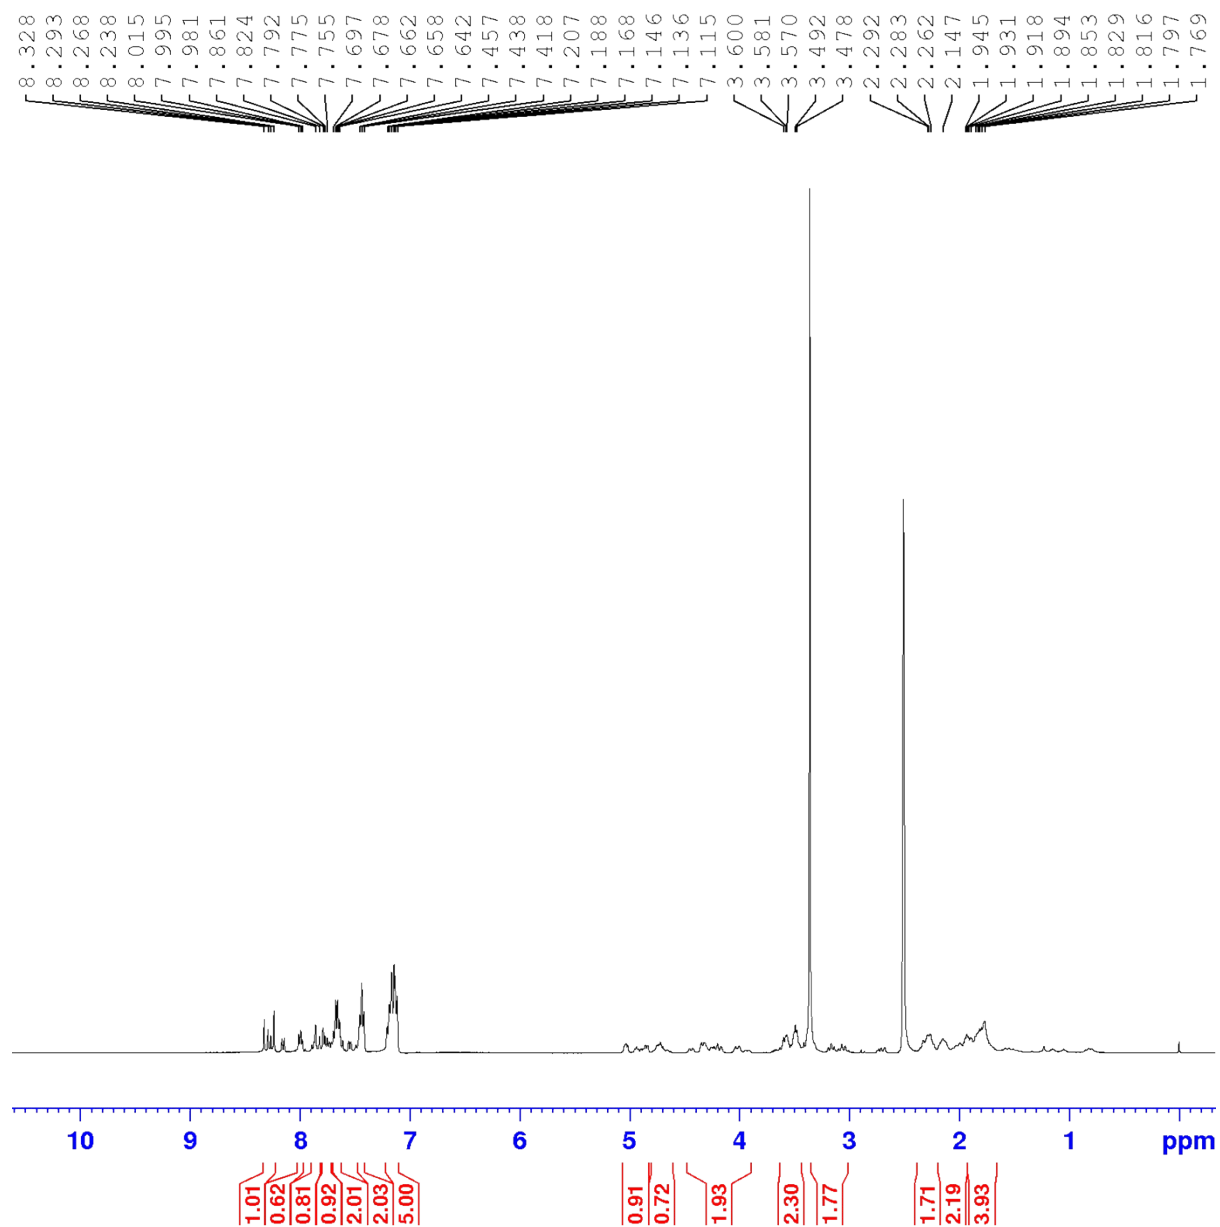

Figure 74. <sup>1</sup>H NMR full spectrum of **12m**

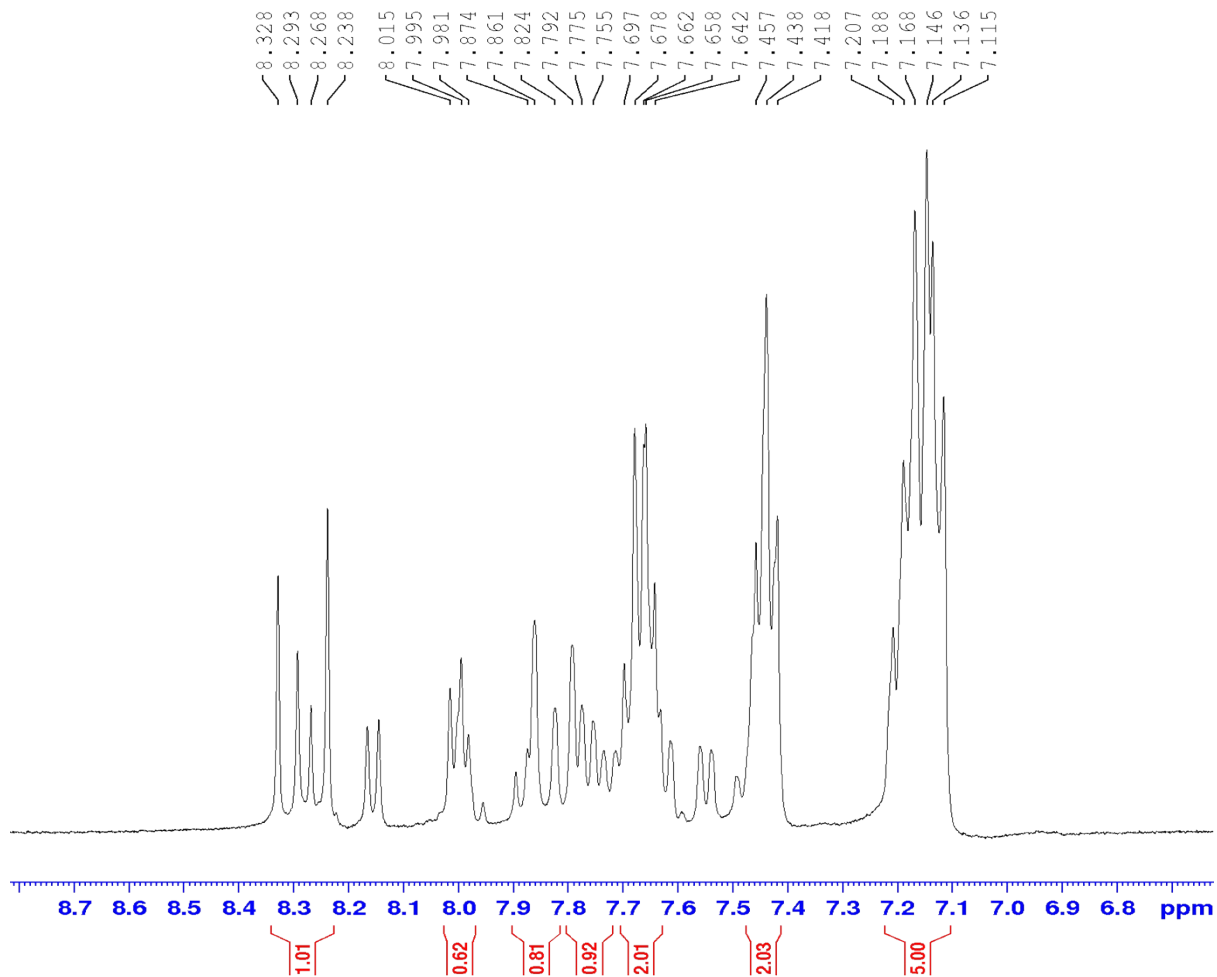

Figure 75. Aromatic region of the  $^1\text{H}$  NMR spectrum for **12m**

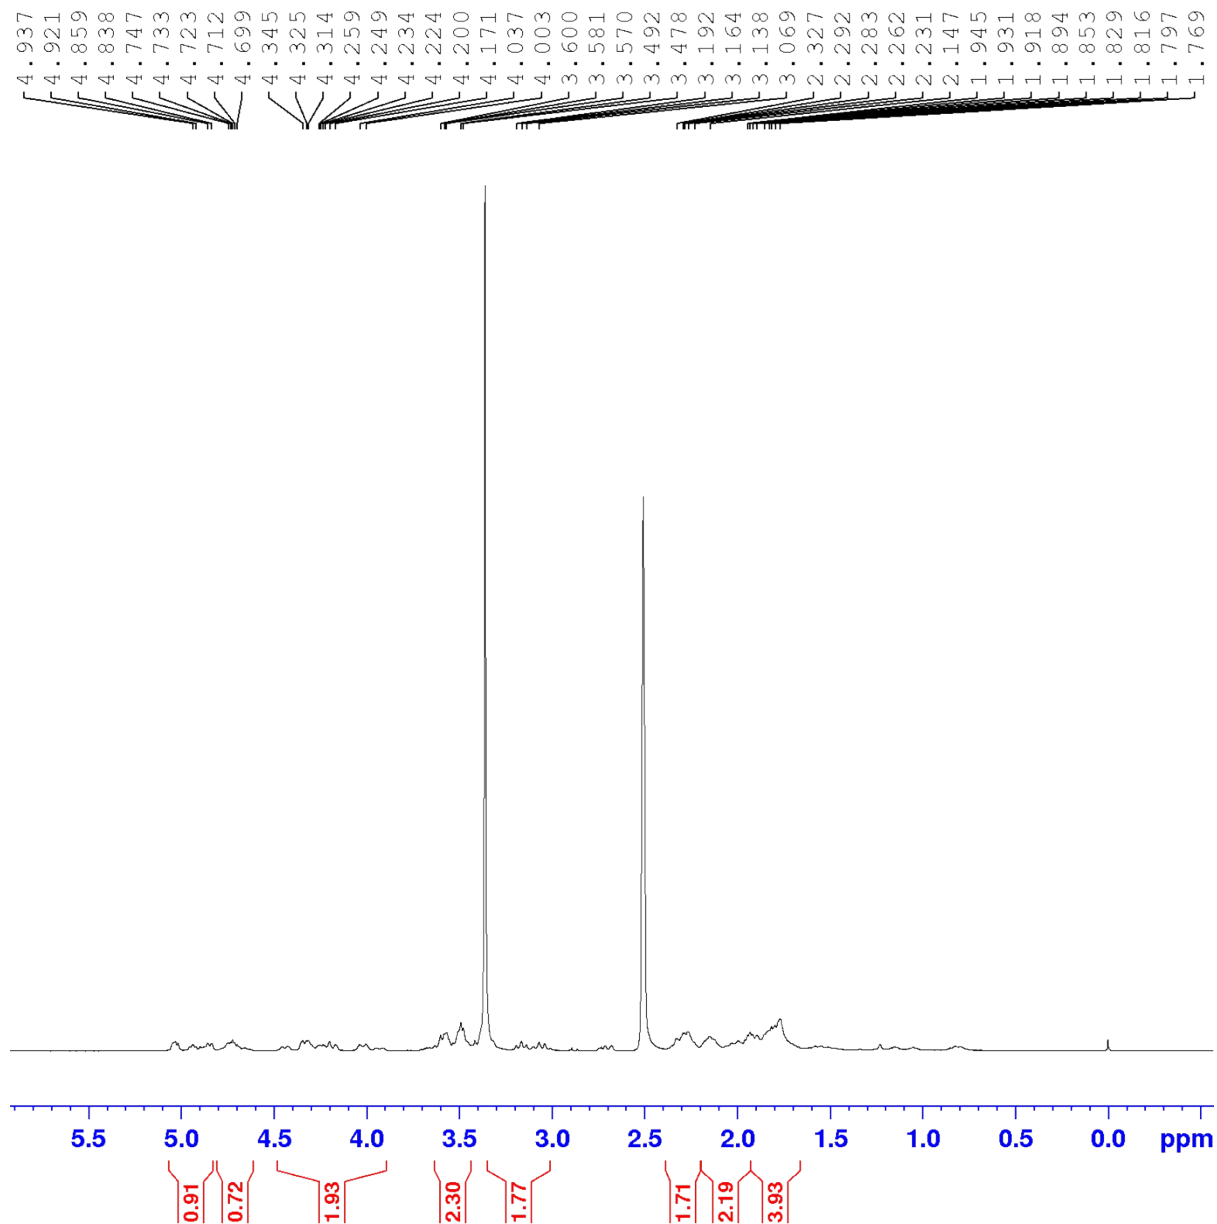

Figure 76. Aliphatic region of the  $^1\text{H}$  NMR spectrum for **12m**

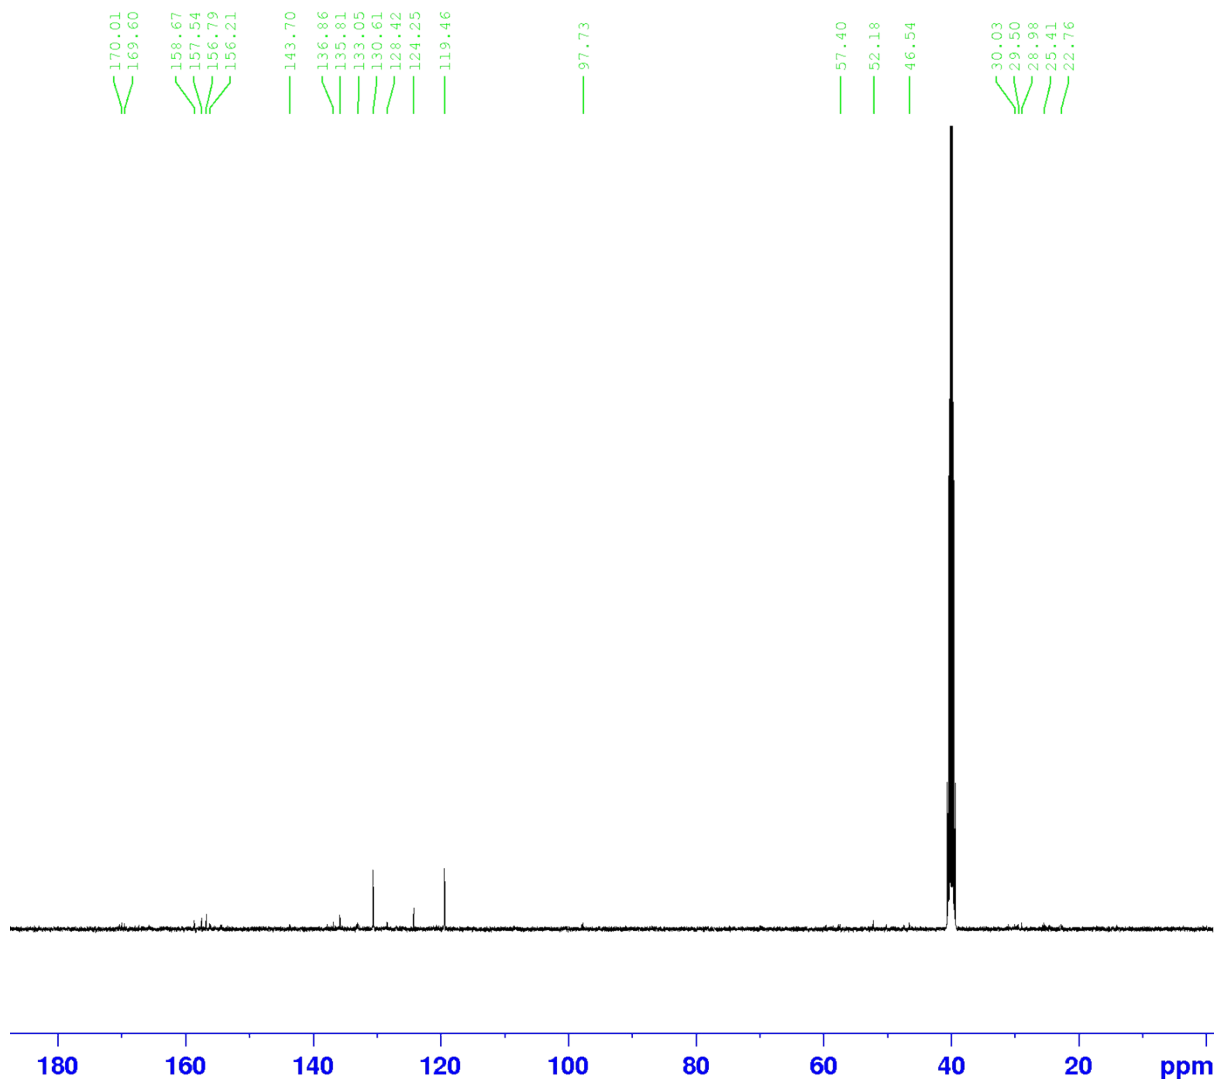

Figure 77.  $^{13}\text{C}$ -NMR spectrum of **12m**

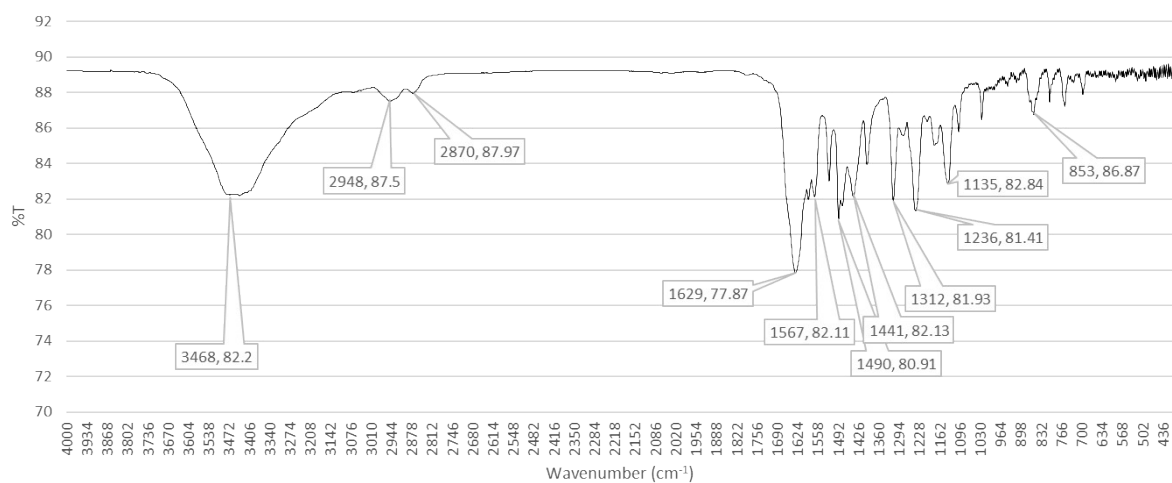

Figure 78. FT-IR spectrum of **12m**

Spectral data of *1-(2-((R)-3-(4-amino-3-(4-phenoxyphenyl)-1H-pyrazolo[3,4-d]pyrimidin-1-yl)piperidine-1-carbonyl)pyrrolidin-1-yl)-2-(4-fluorophenyl)ethan-1-one (12n)*

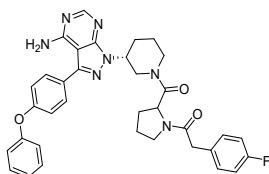



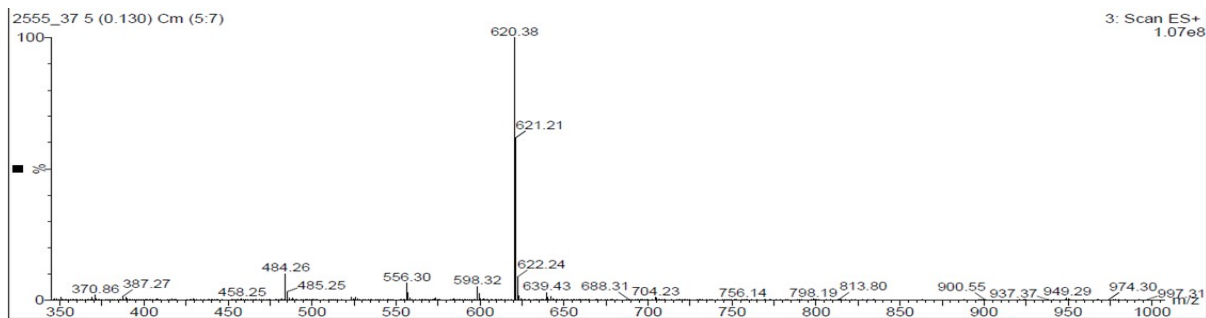

Figure 79. ESI-MS spectrum of **12n**

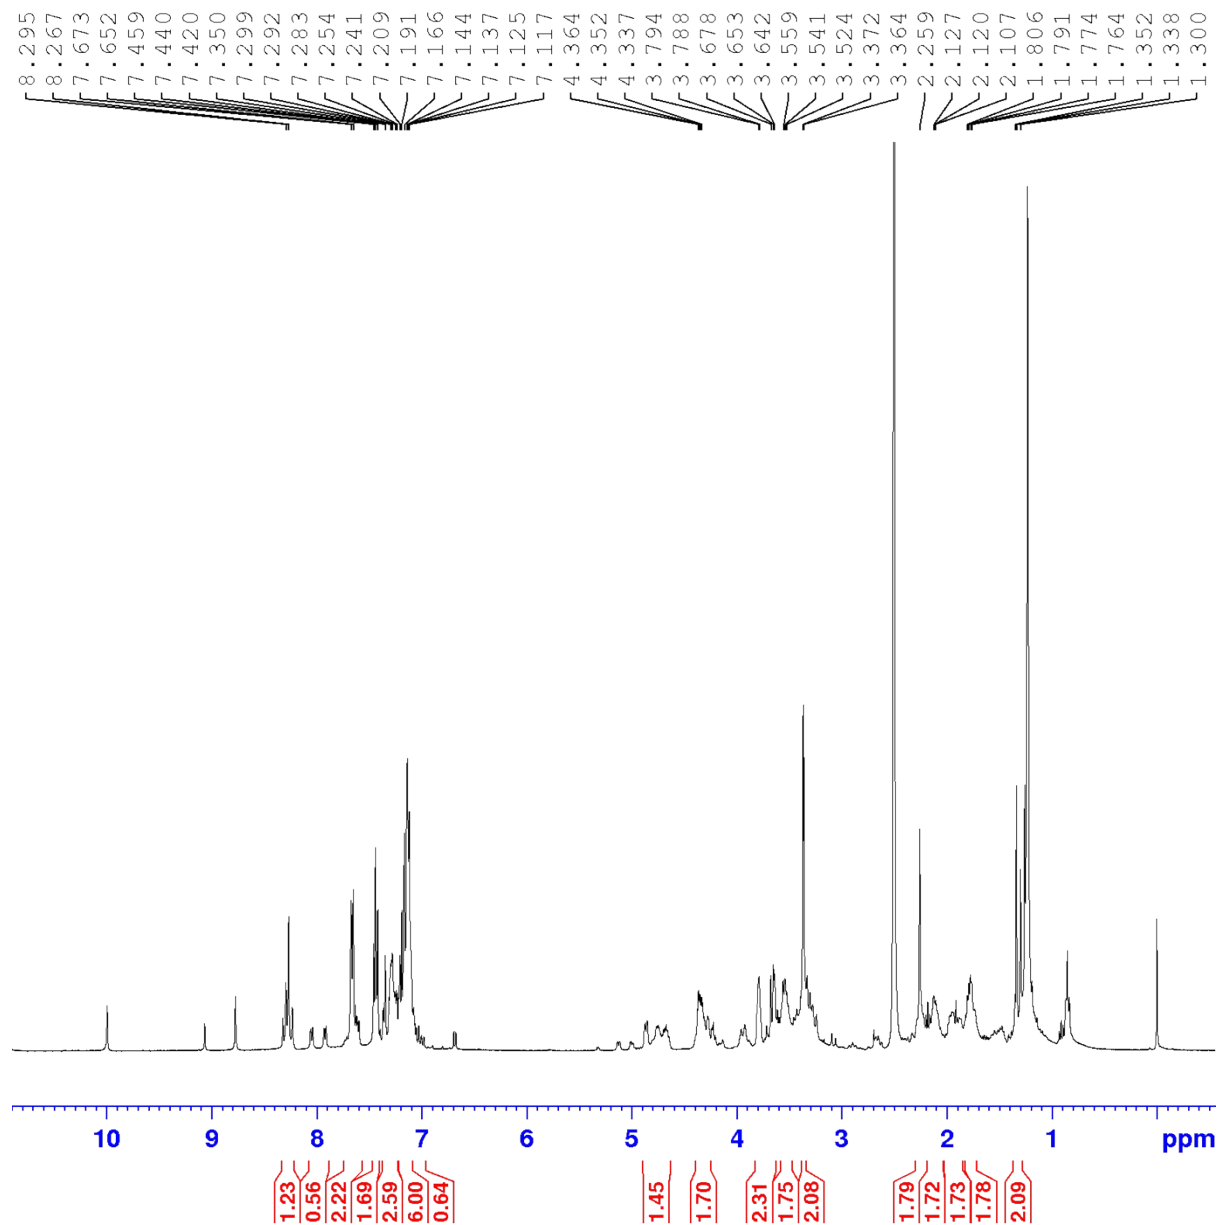

Figure 80.  $^1\text{H}$  NMR full spectrum of **12n**

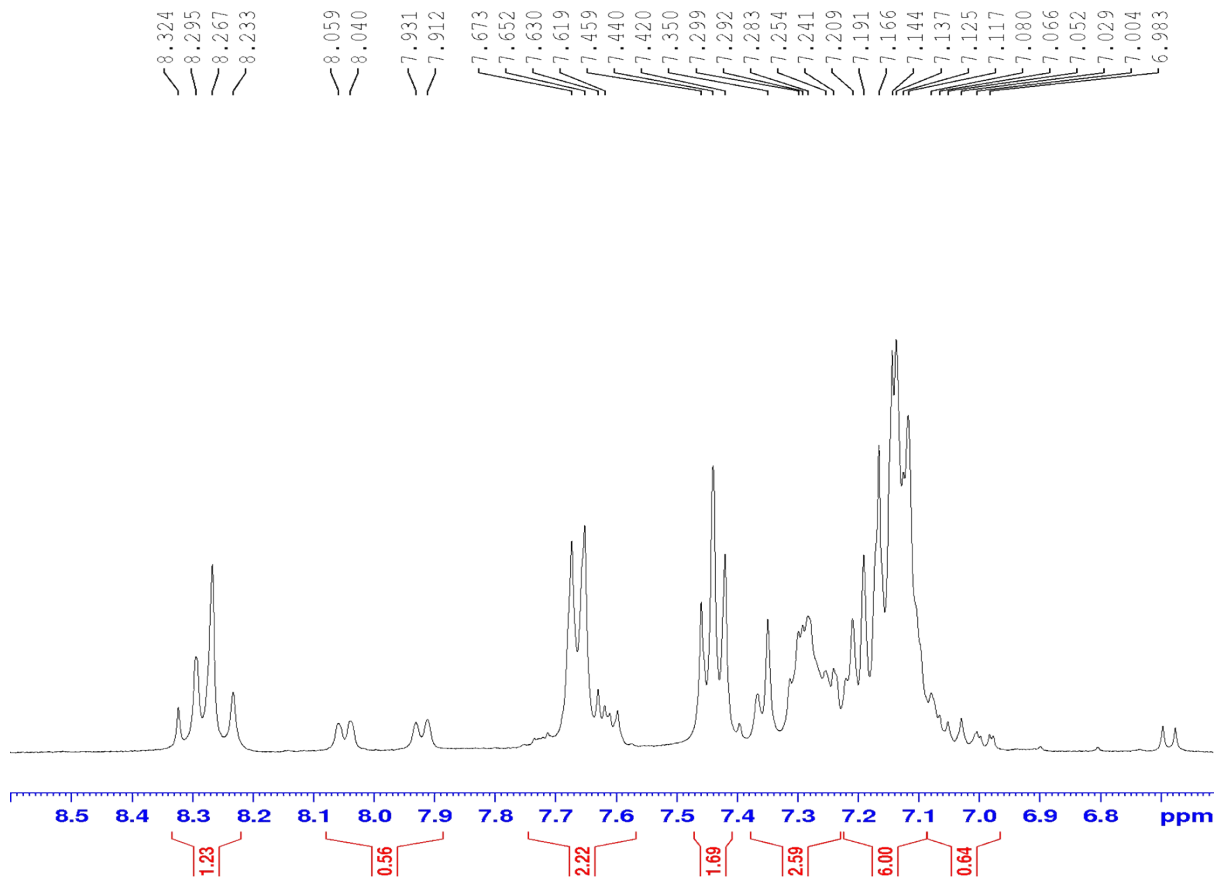

Figure 81. Aromatic region of the  $^1\text{H}$  NMR spectrum for **12n**

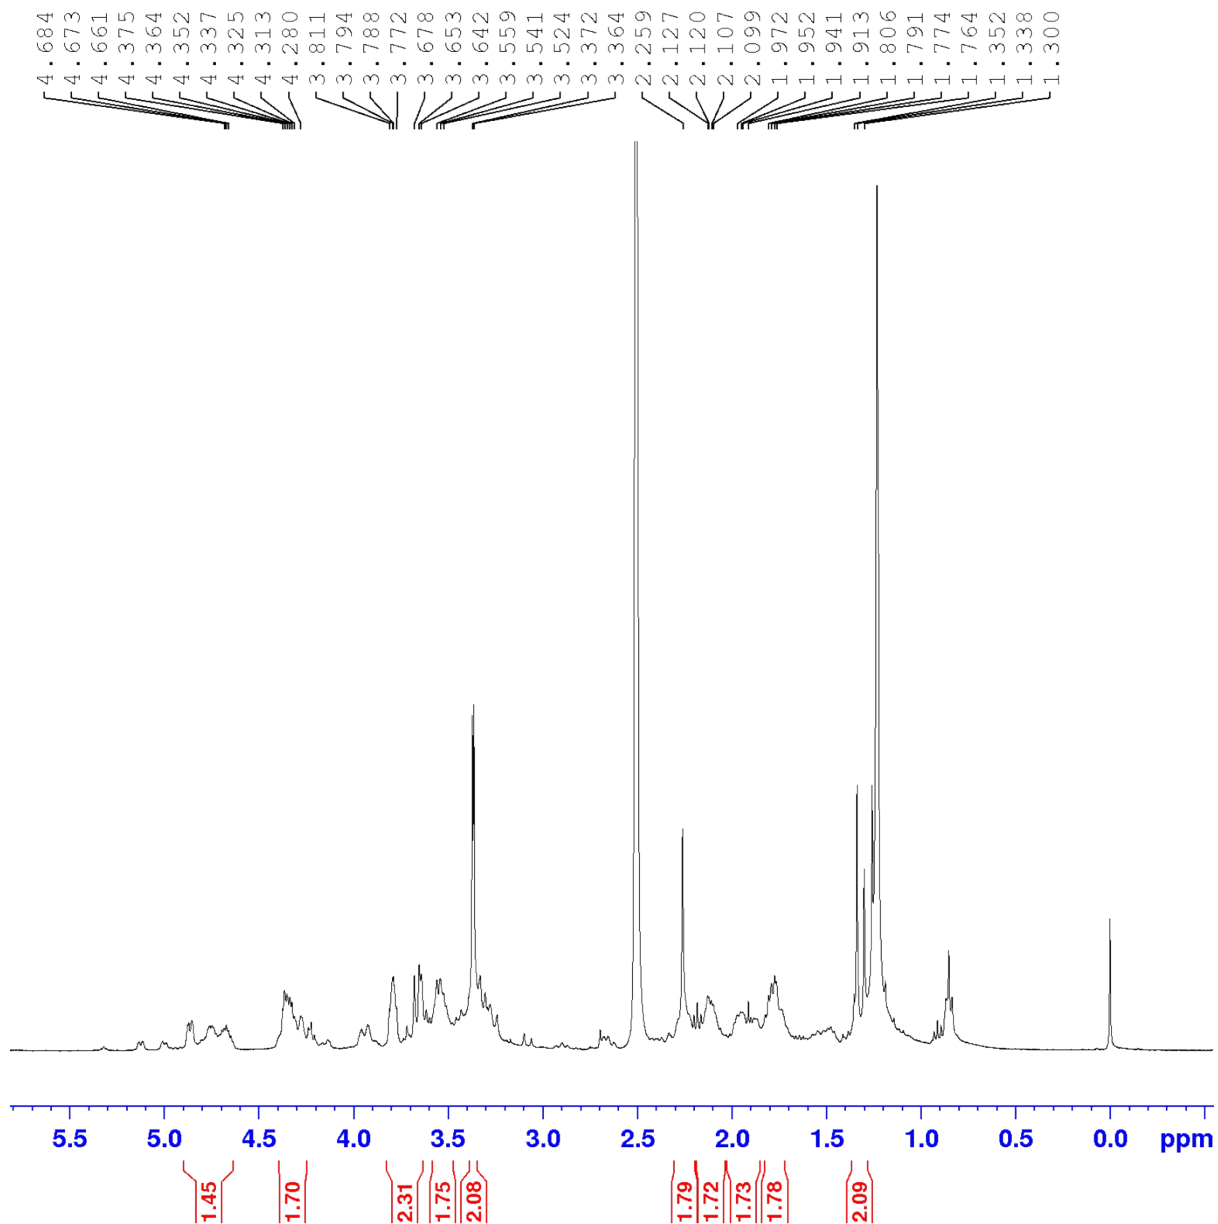

Figure 82. Aliphatic region of the  $^1\text{H}$  NMR spectrum for **12n**

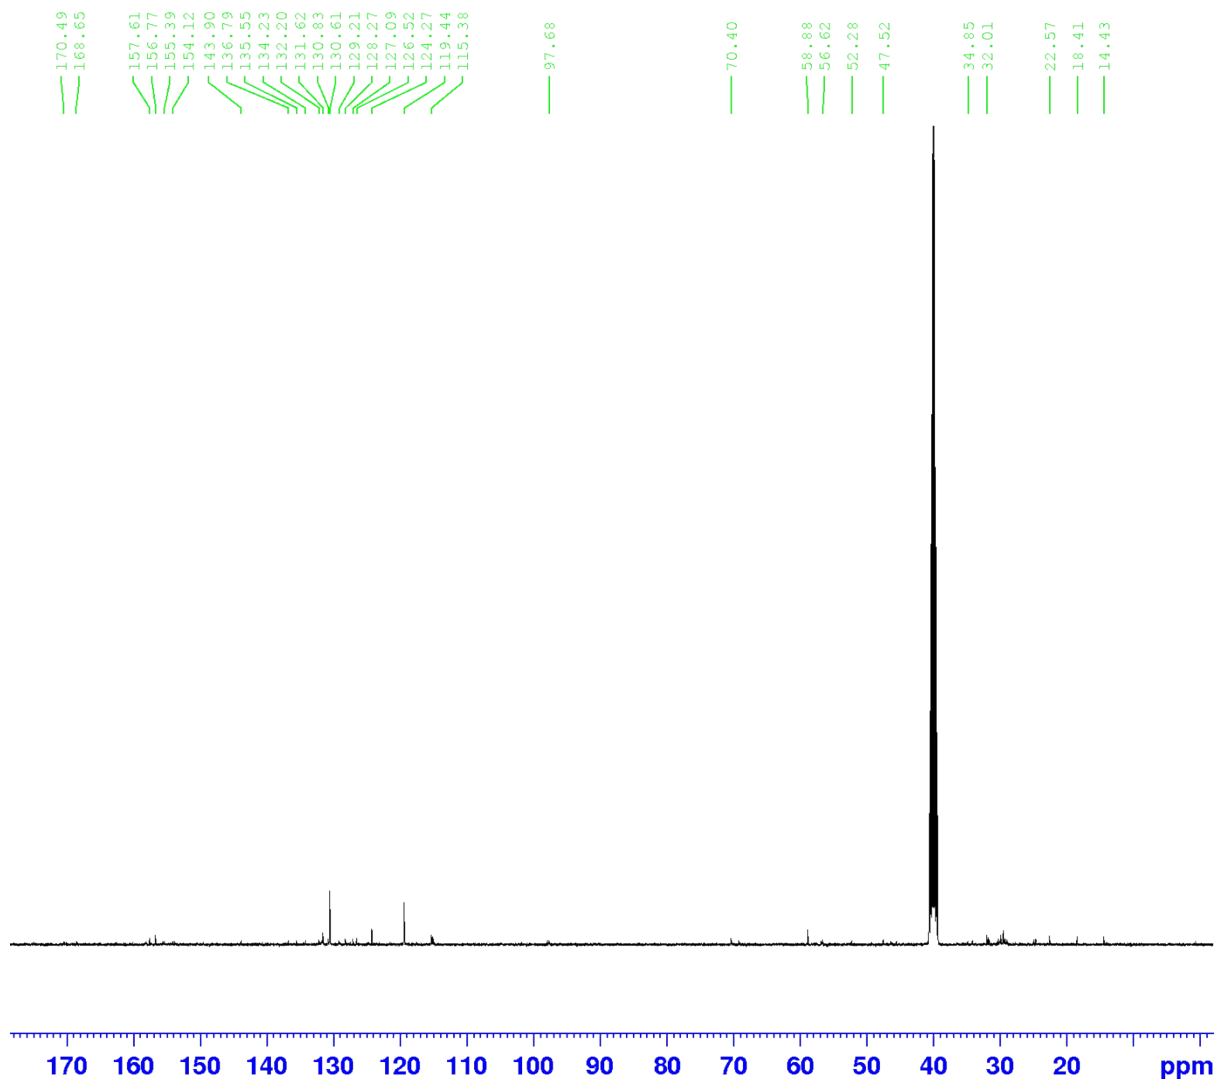

Figure 83.  $^{13}\text{C}$ -NMR spectrum of **12n**

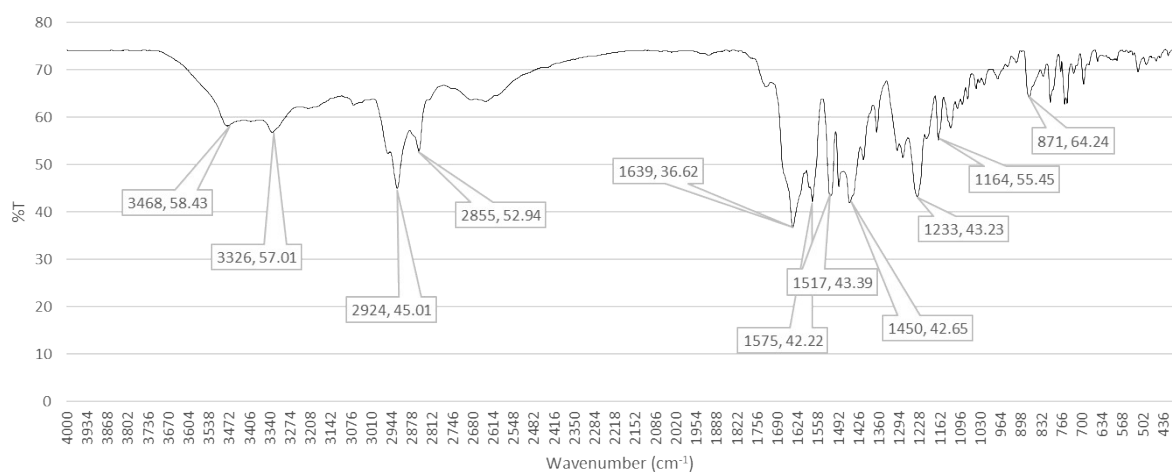

Figure 84. FT-IR spectrum of **12n**

Spectral data of *4-amino-1-((3R)-1-((3-methylbenzoyl)propyl)piperidin-3-yl)-3-(4-phenoxyphenyl)-1H-pyrazolo[3,4-d]pyrimidine (12o)*

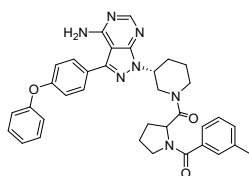

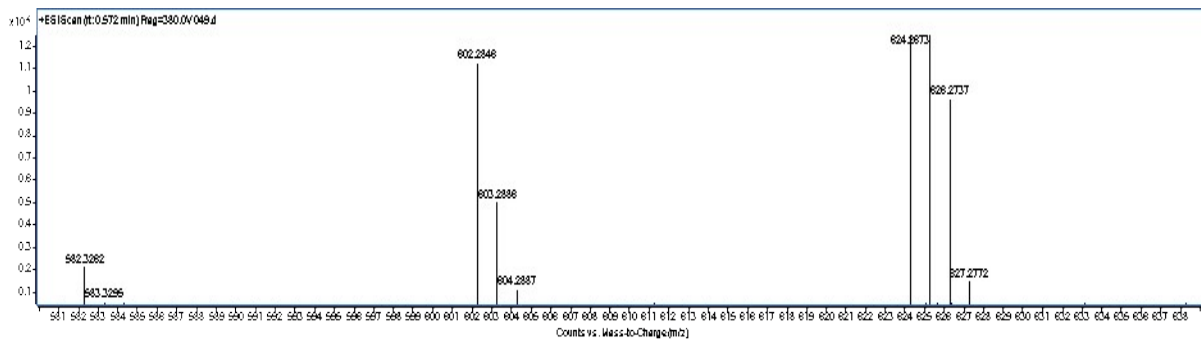

Figure 85. HRMS spectrum of **12o**

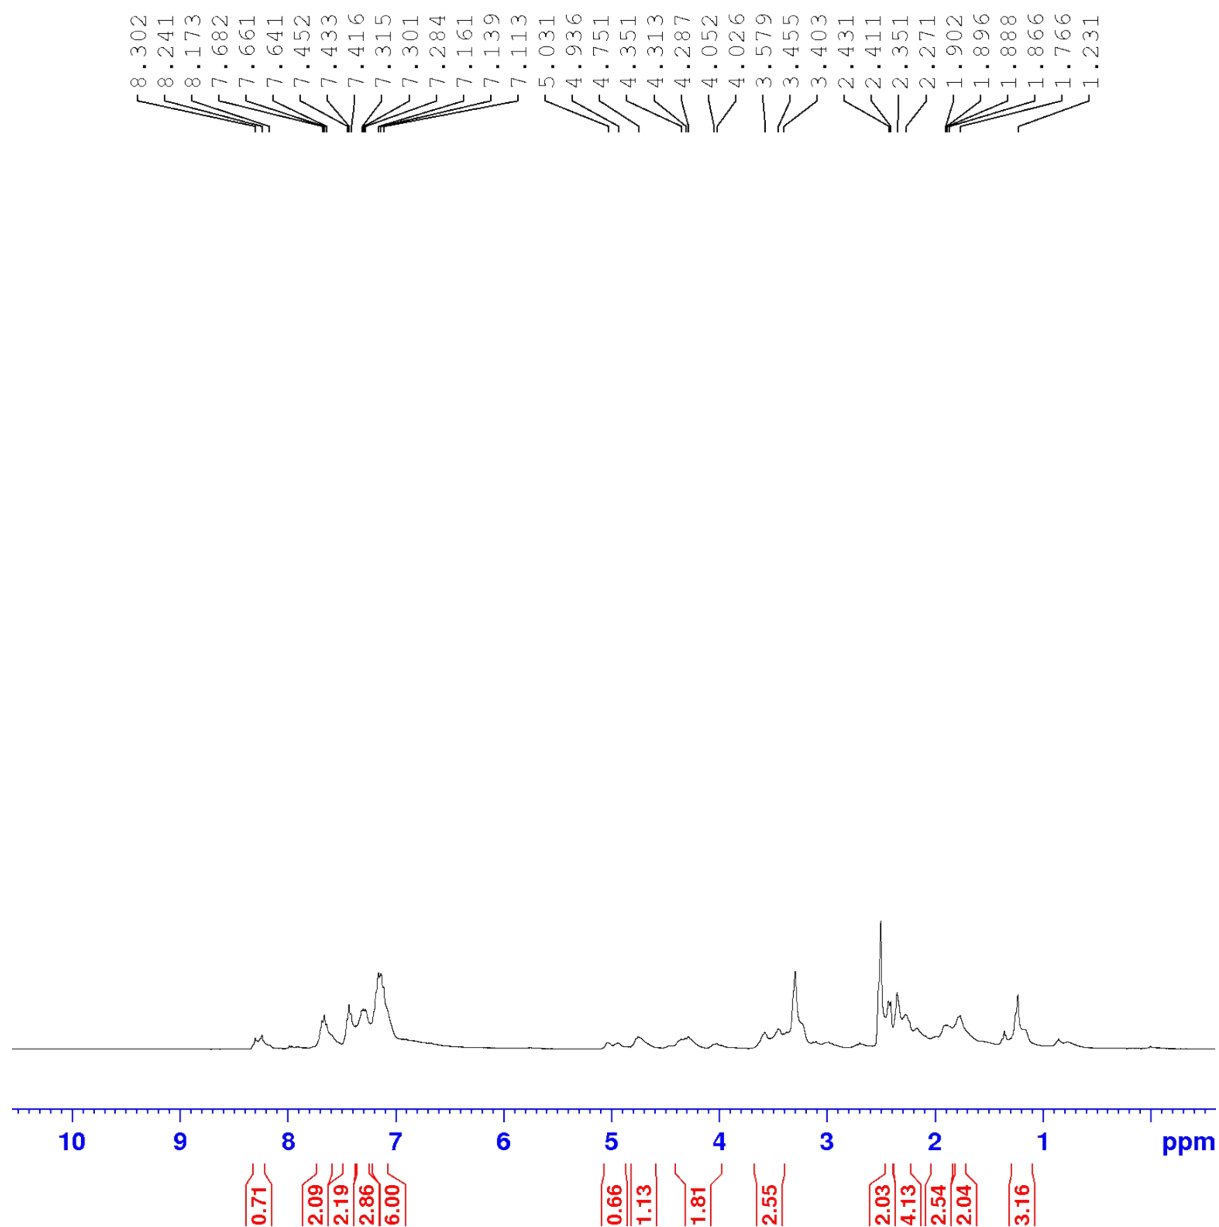

Figure 86. <sup>1</sup>H NMR full spectrum of **12o**

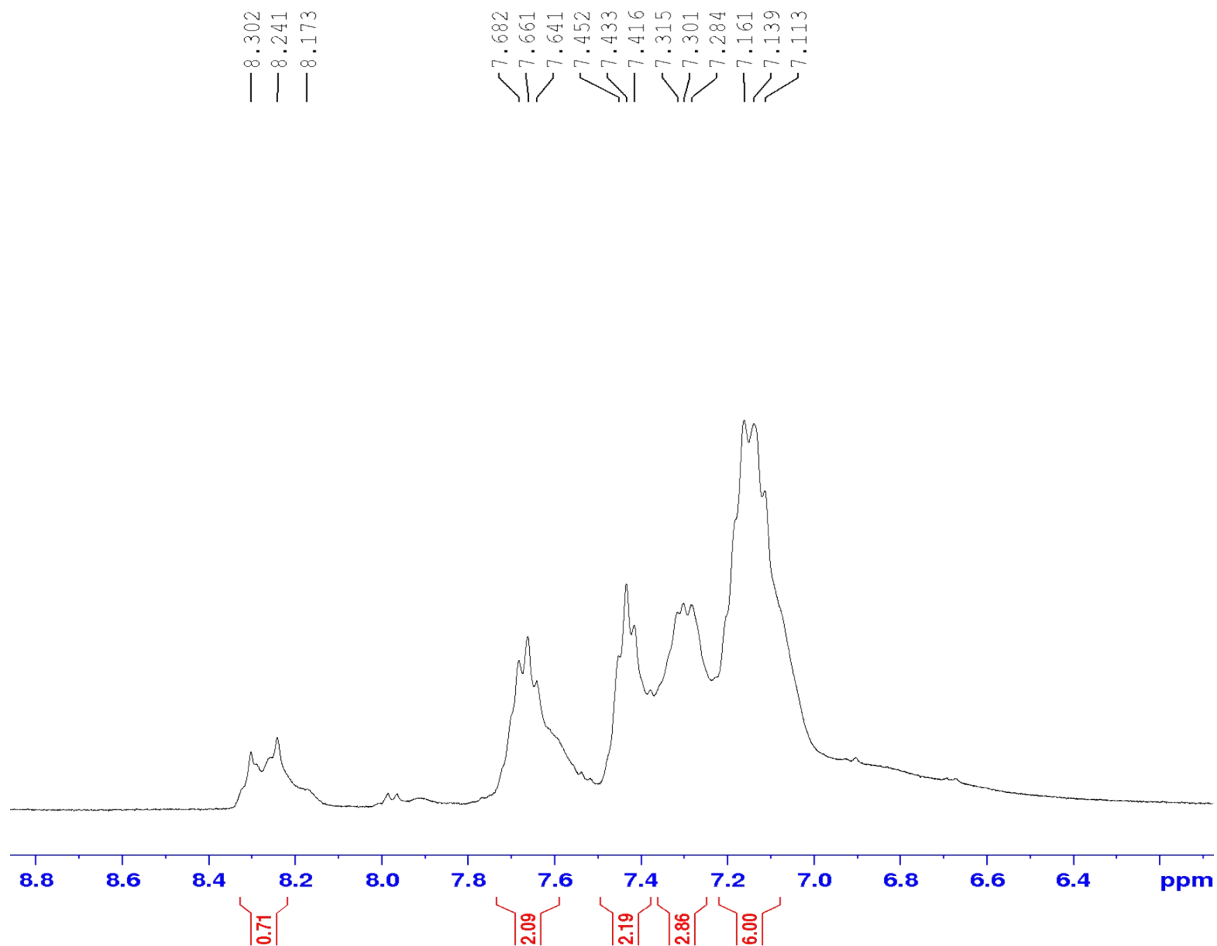

Figure 87. Aromatic region of the  $^1\text{H}$  NMR spectrum for **12o**

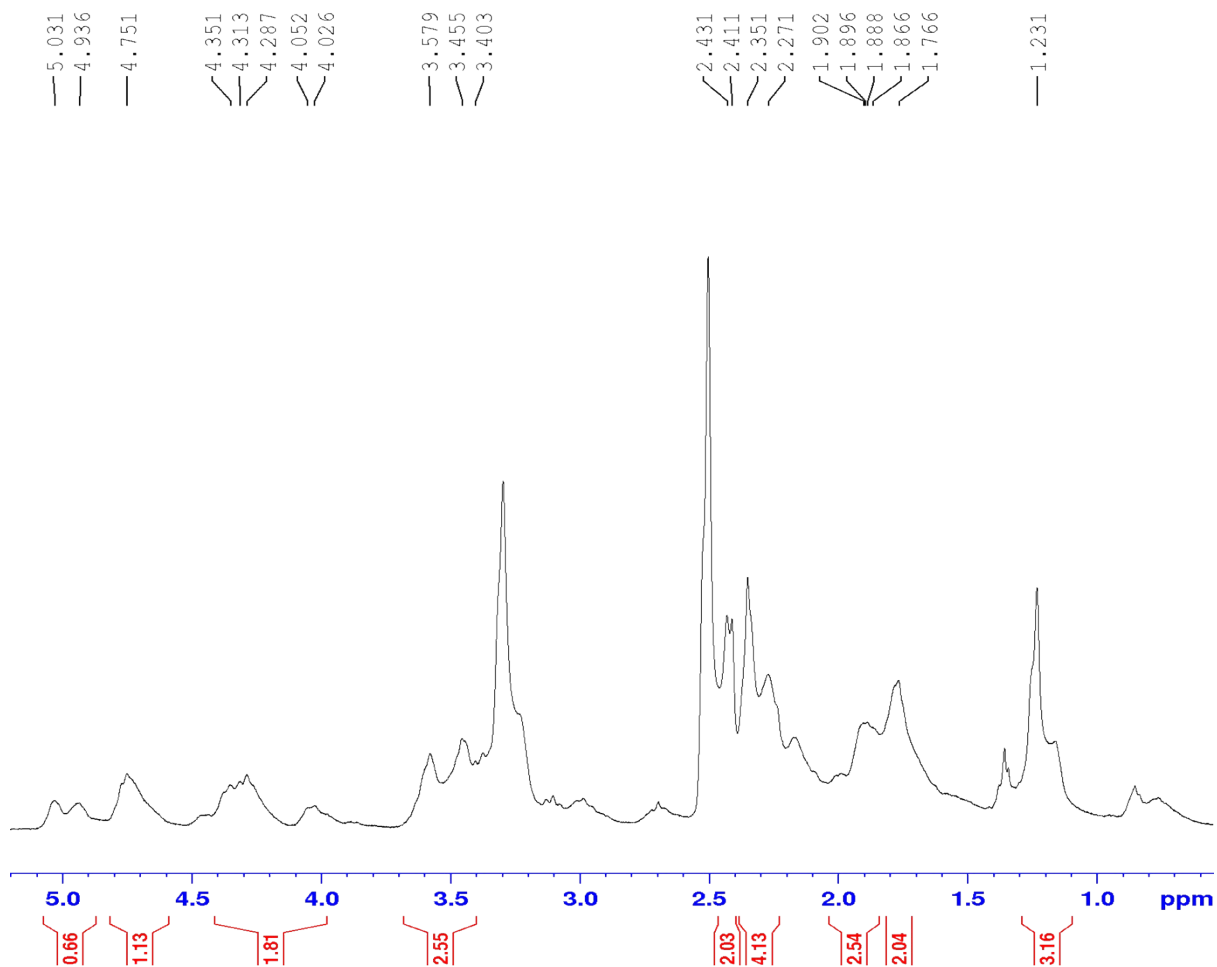

Figure 88. Aliphatic region of the  $^1\text{H}$  NMR spectrum for **12o**

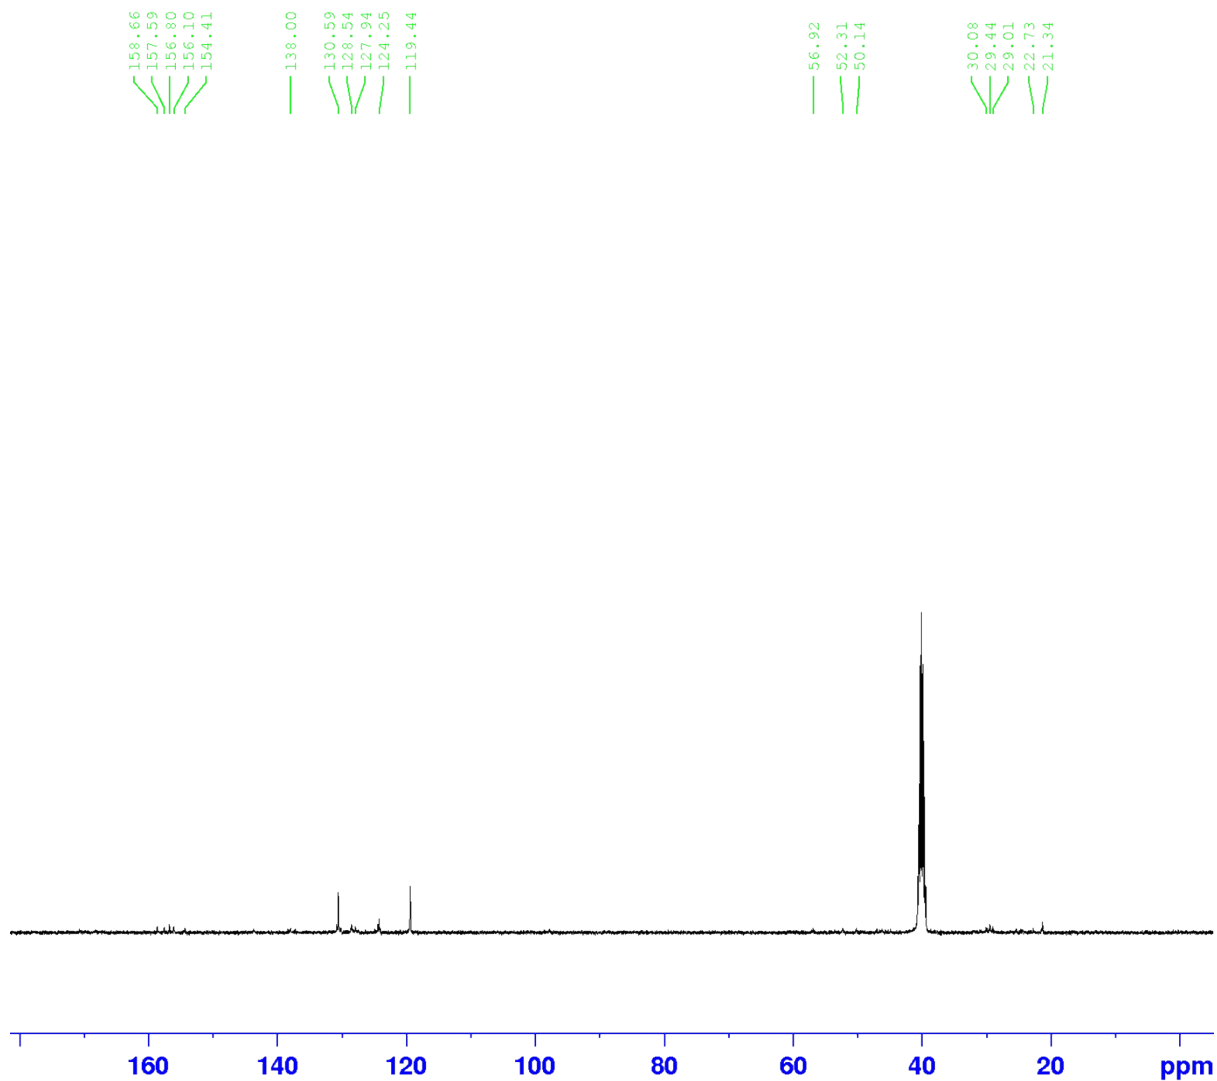

Figure 89.  $^{13}\text{C}$ -NMR spectrum of **12o**

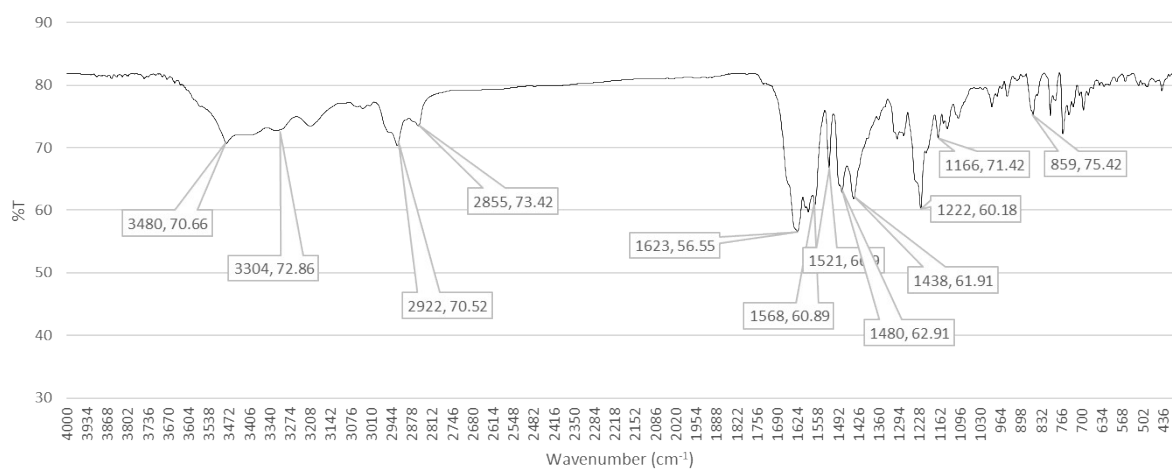

Figure 90. FT-IR spectrum of **12o**

Spectral data of *4-amino-1-((3R)-1-((5-chlorothiophene-2-carbonyl)propyl)piperidin-3-yl)-3-(4-phenoxyphenyl)-1H-pyrazolo[3,4-d]pyrimidine (12p)*

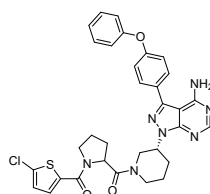

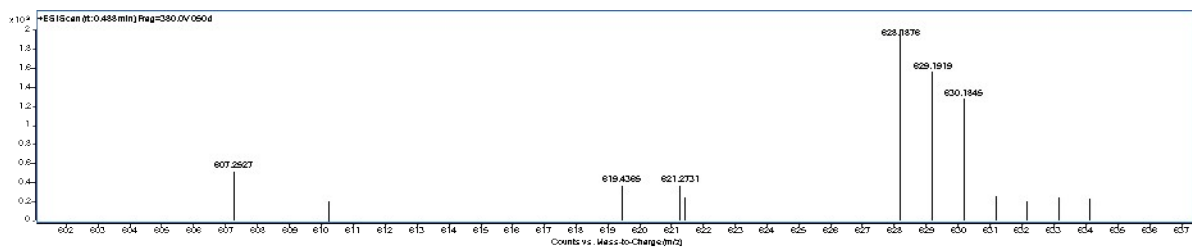

Figure 91. HRMS spectrum of **12p**

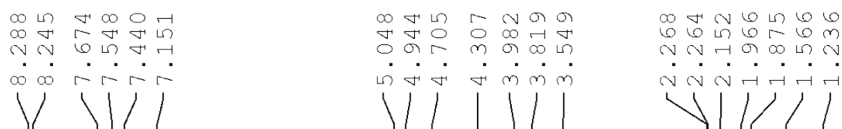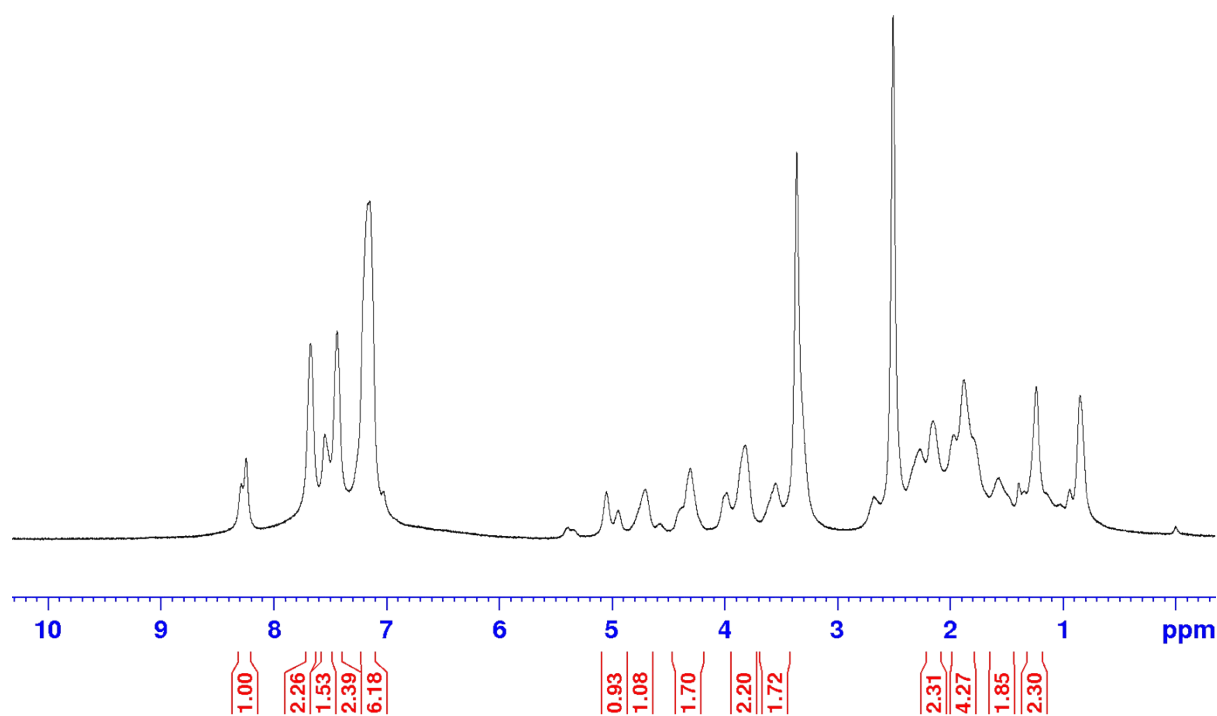

Figure 92. <sup>1</sup>H NMR full spectrum of **12p**



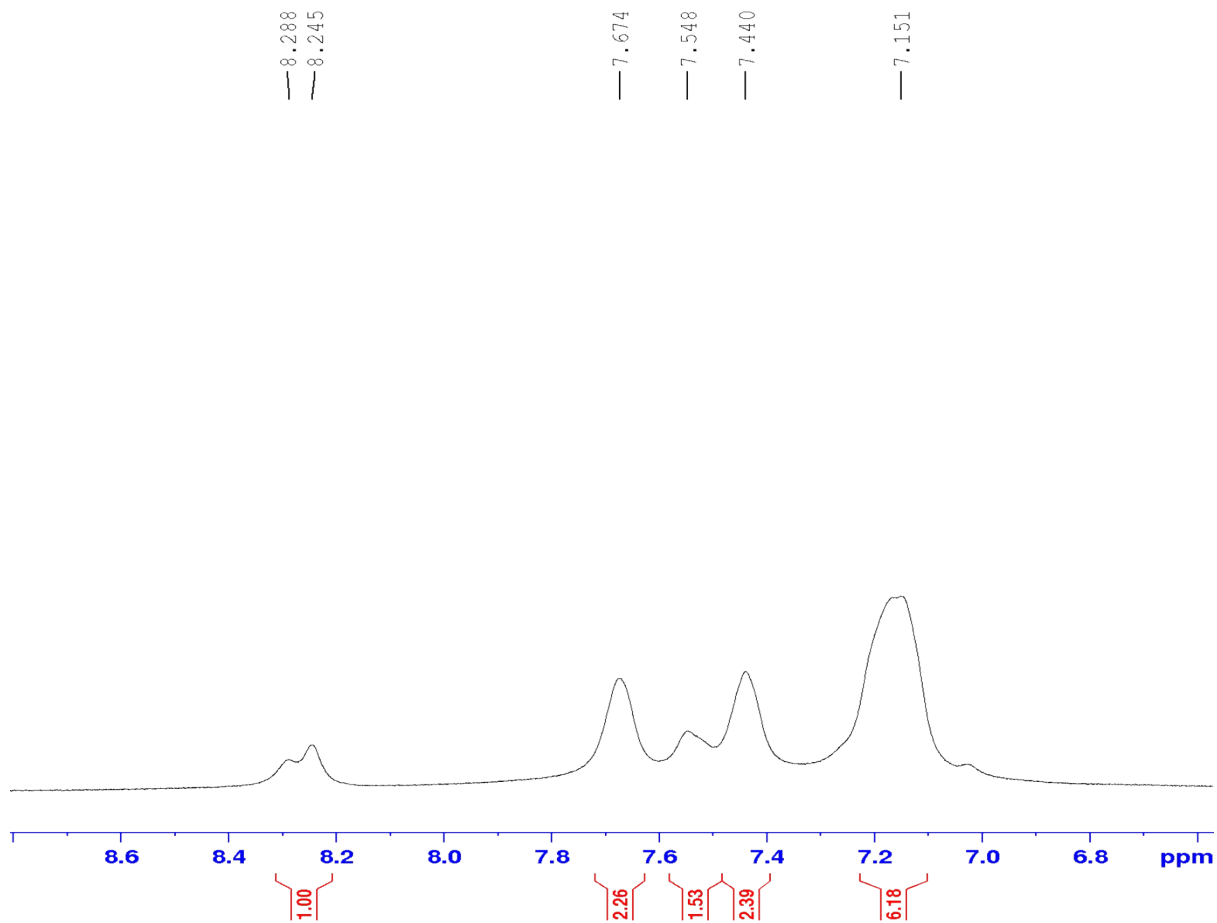

Figure 93. Aromatic region of the  $^1\text{H}$  NMR spectrum for **12p**

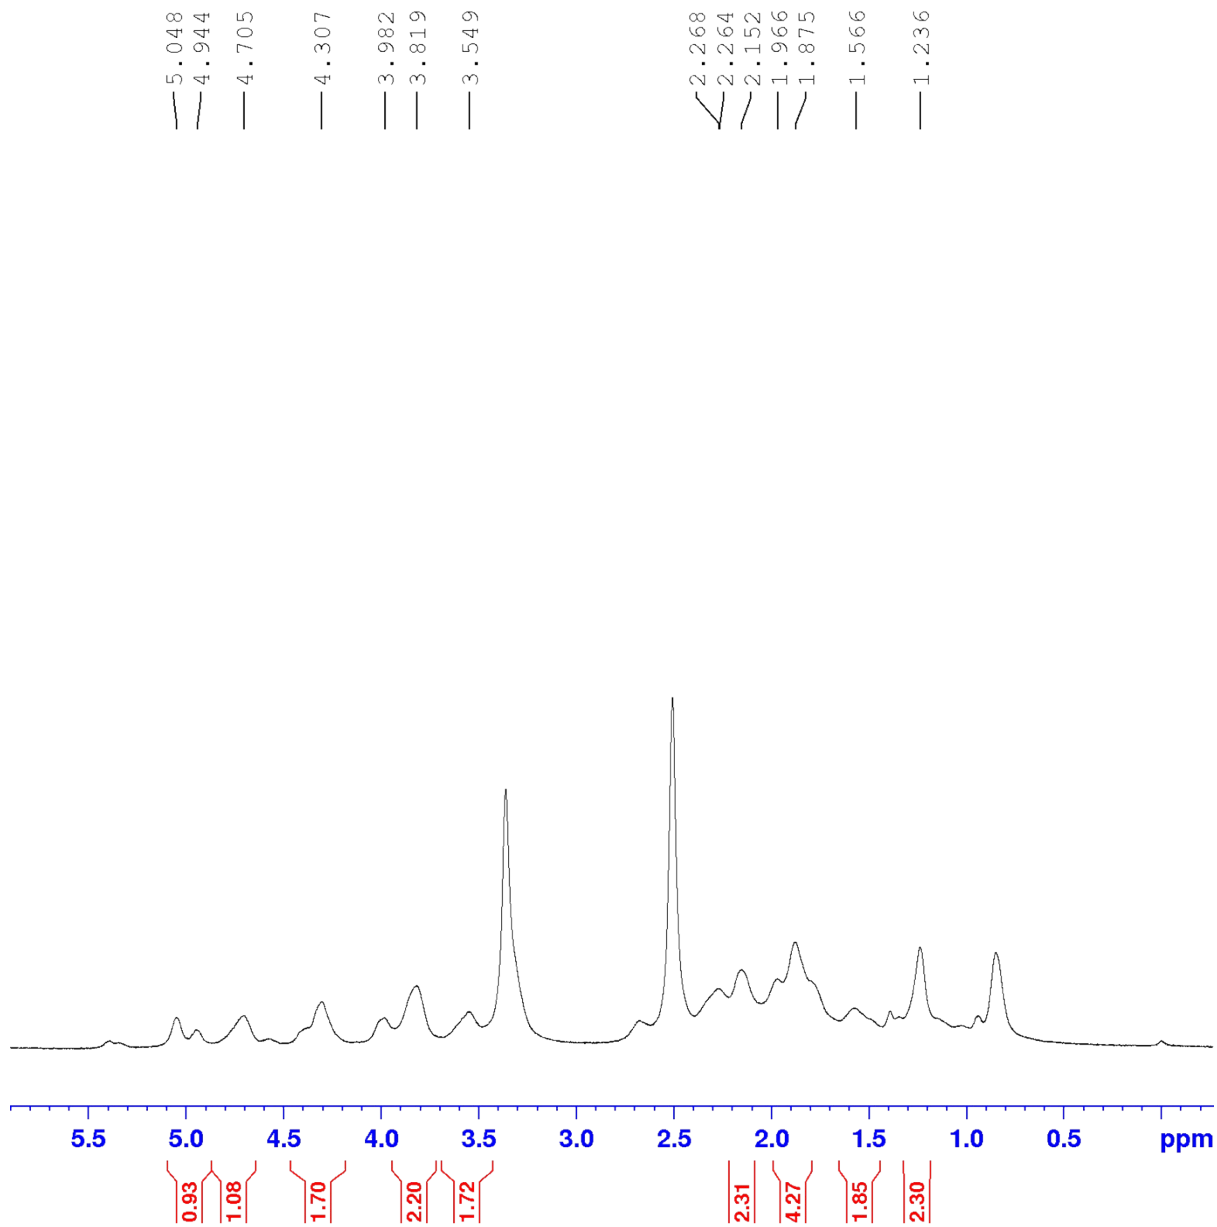

Figure 94. Aliphatic region of the  $^1\text{H}$  NMR spectrum for **12p**

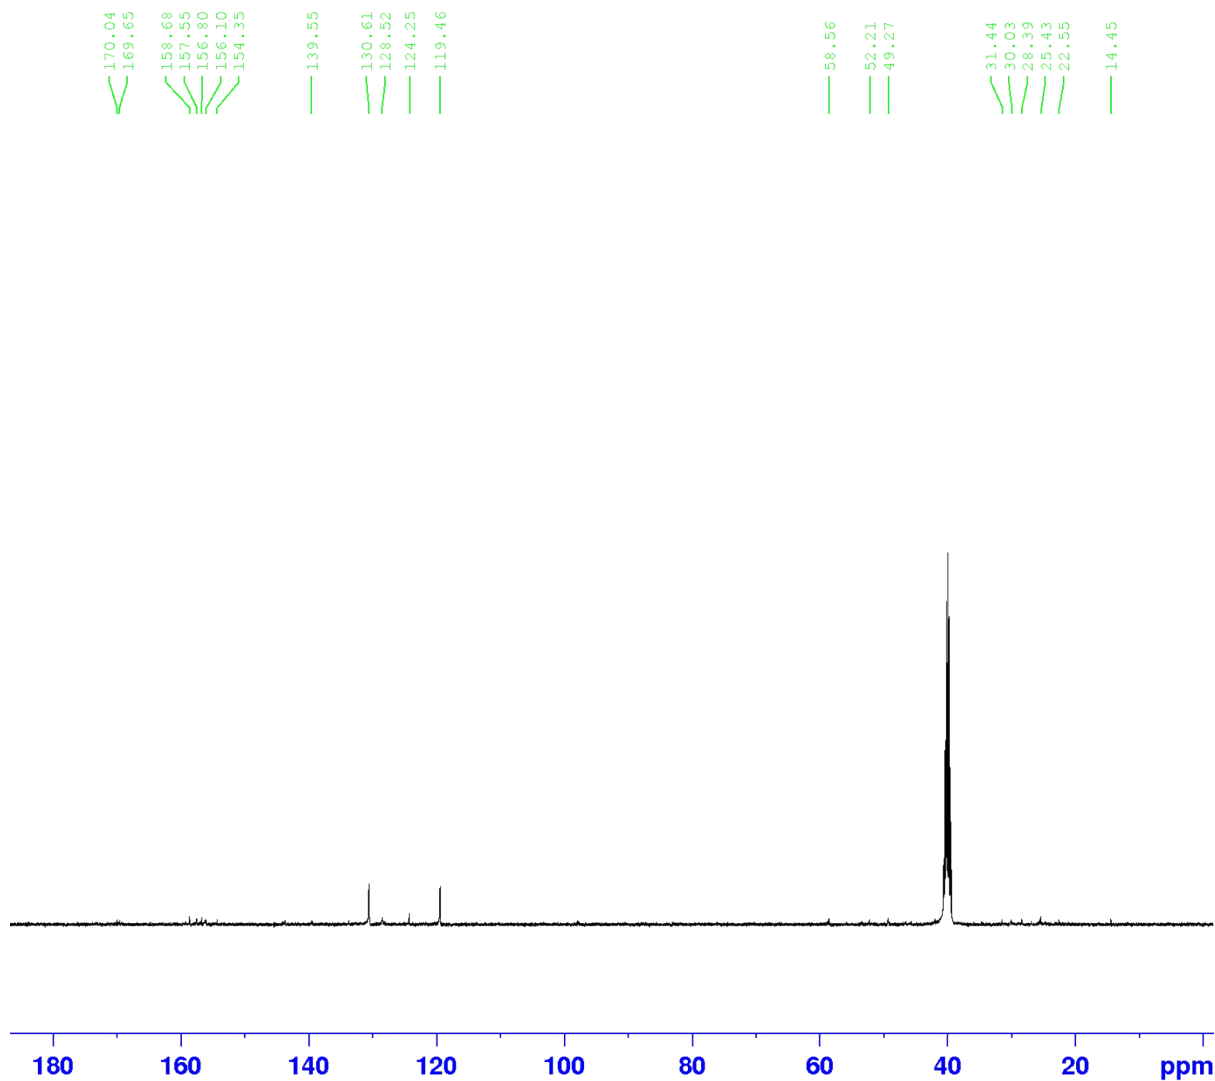

Figure 95.  $^{13}\text{C}$ -NMR spectrum of **12p**

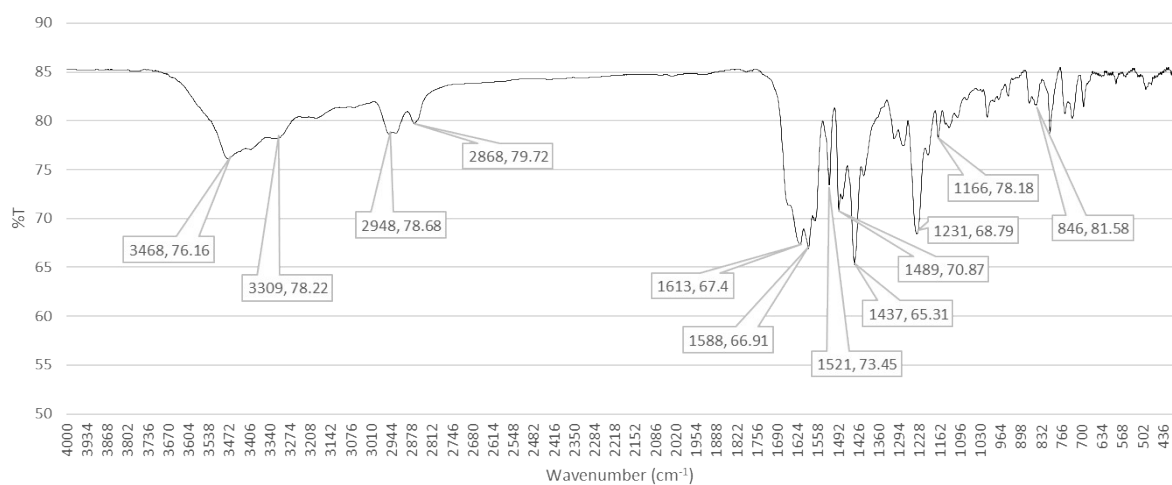

Figure 96. FT-IR spectrum of **12p**

Spectral data of *4-amino-1-((3R)-1-((4-methoxybenzoyl)propyl)piperidin-3-yl)-3-(4-phenoxyphenyl)-1H-pyrazolo[3,4-d]pyrimidine (12q)*

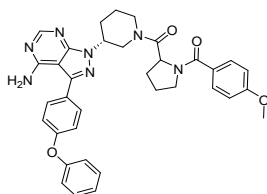

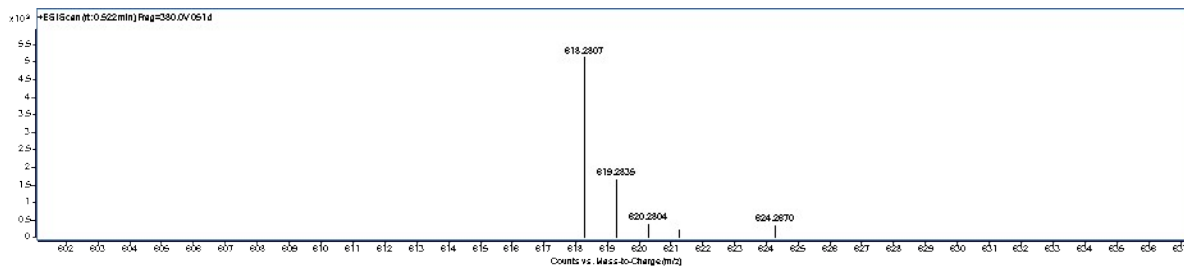

Figure 97. HRMS spectrum of 12q

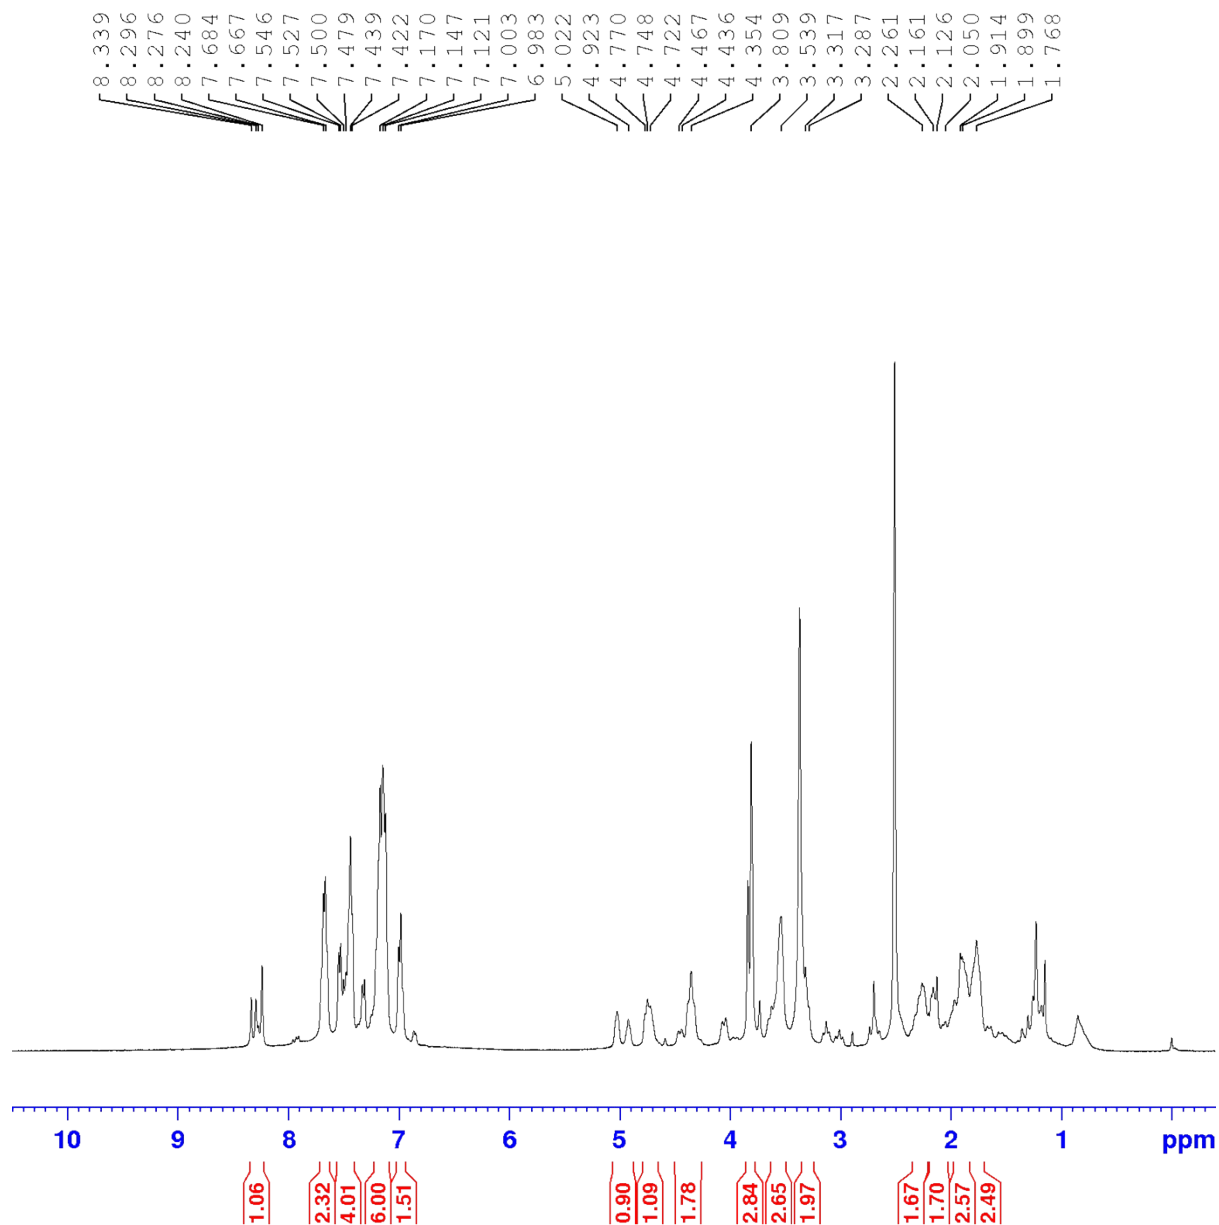

Figure 98. <sup>1</sup>H NMR full spectrum of 12q

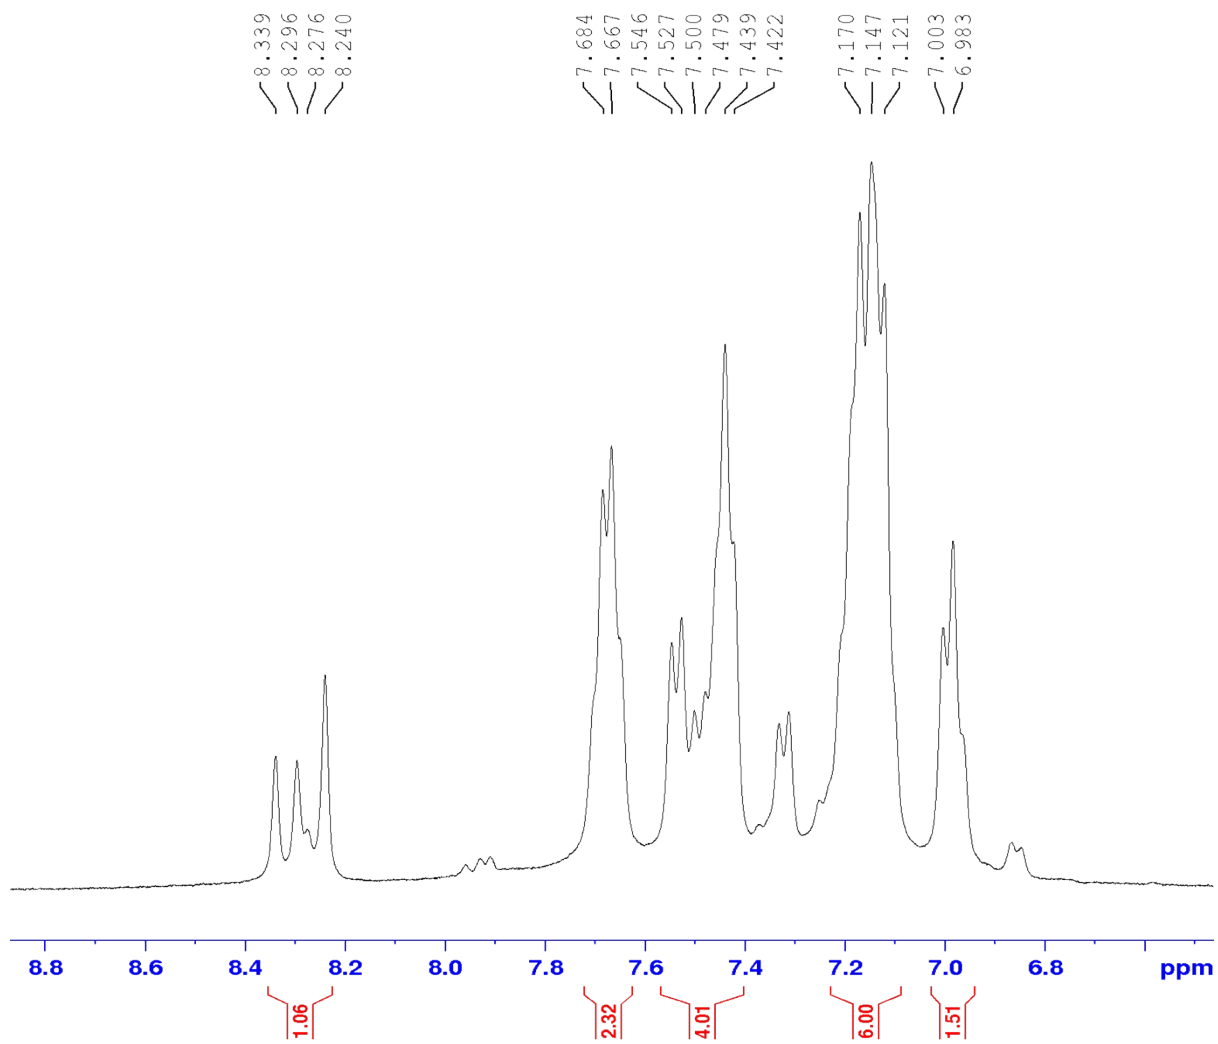

Figure 99. Aromatic region of the  $^1\text{H}$  NMR spectrum for **12q**

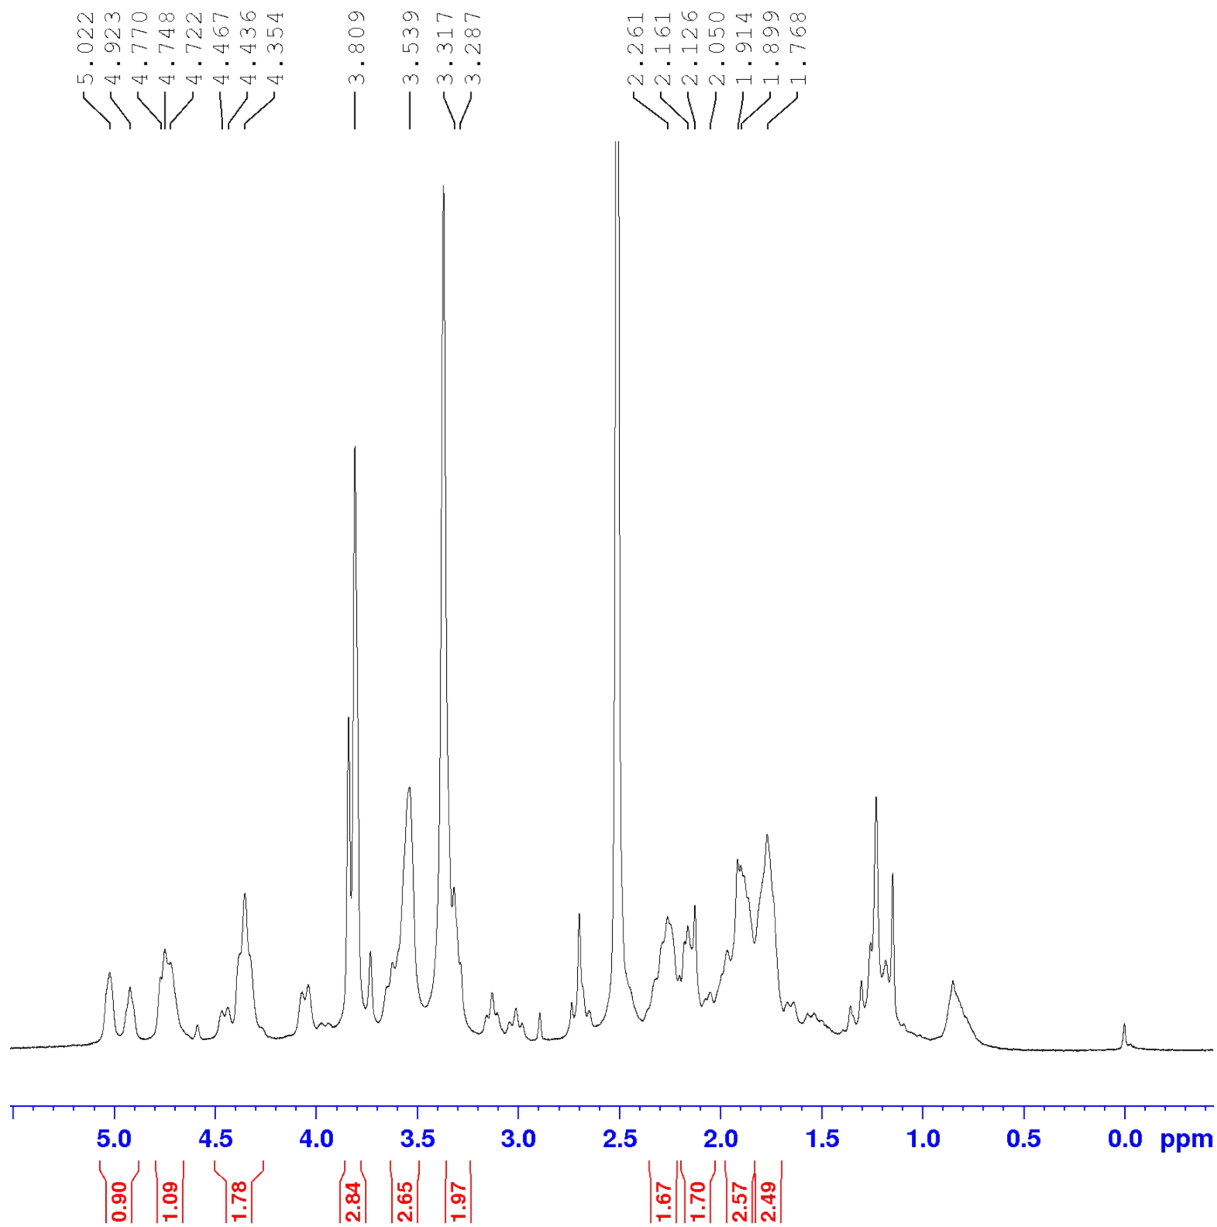

Figure 100. Aliphatic region of the  $^1\text{H}$  NMR spectrum for **12q**

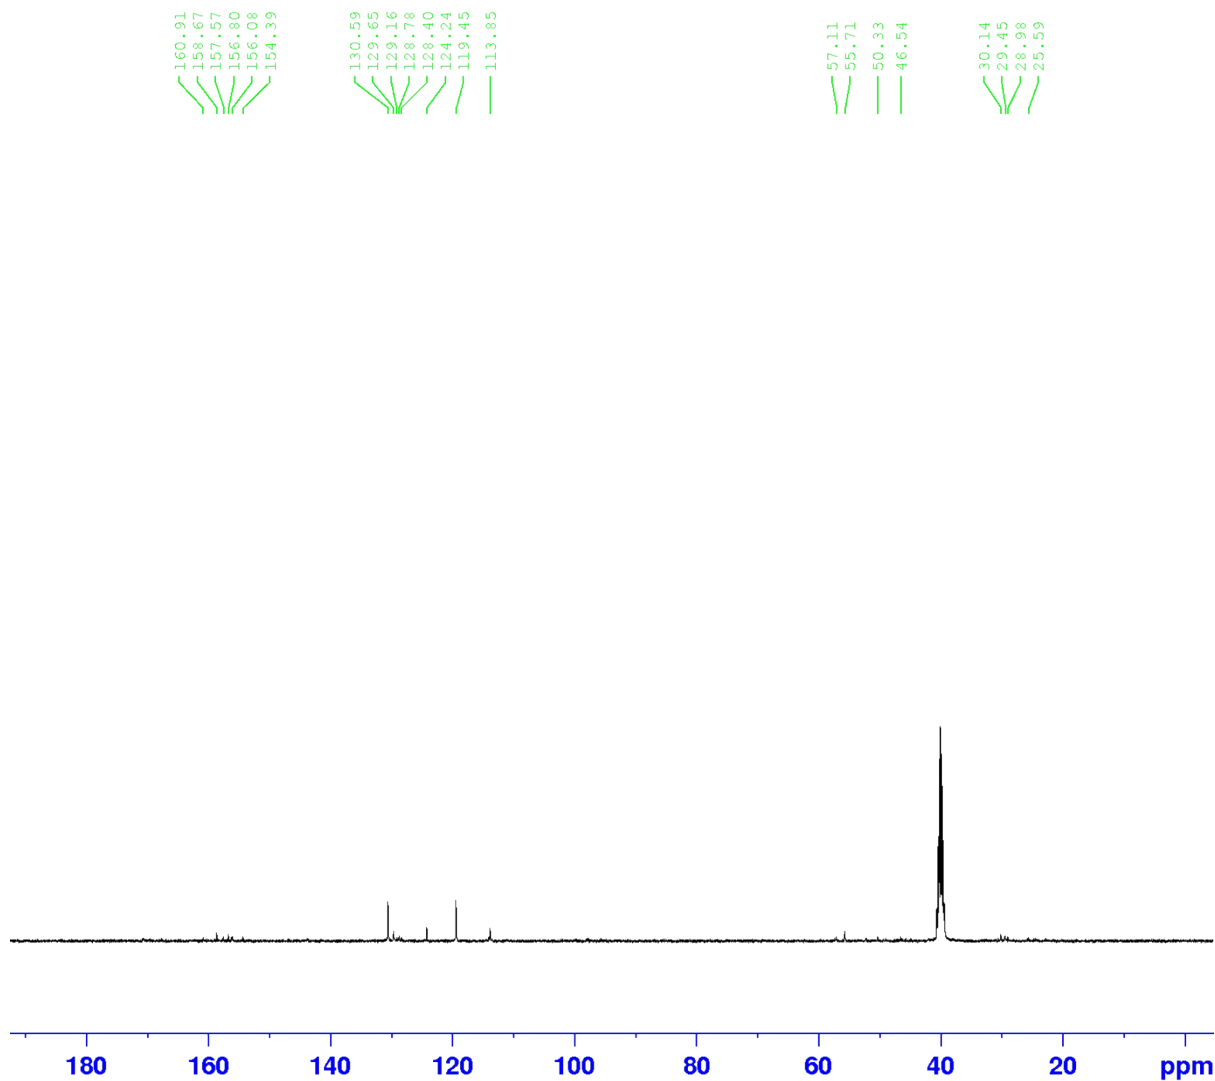

Figure 101.  $^{13}\text{C}$ -NMR spectrum of **12q**

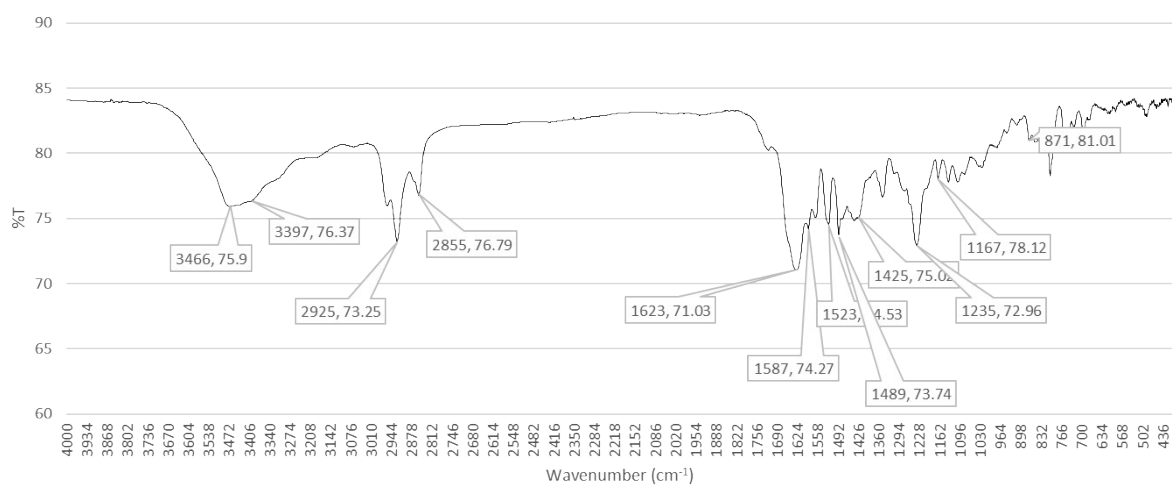

Figure 102. FT-IR spectrum of **12q**

Spectral data of *7-amino-3-((3R)-1-((3-chlorobenzoyl)propyl)piperidin-3-yl)-1-(4-phenoxyphenyl)-1H-pyrazolo[4,3-d]pyrimidine (12r)*

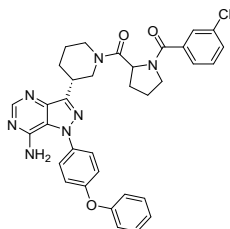

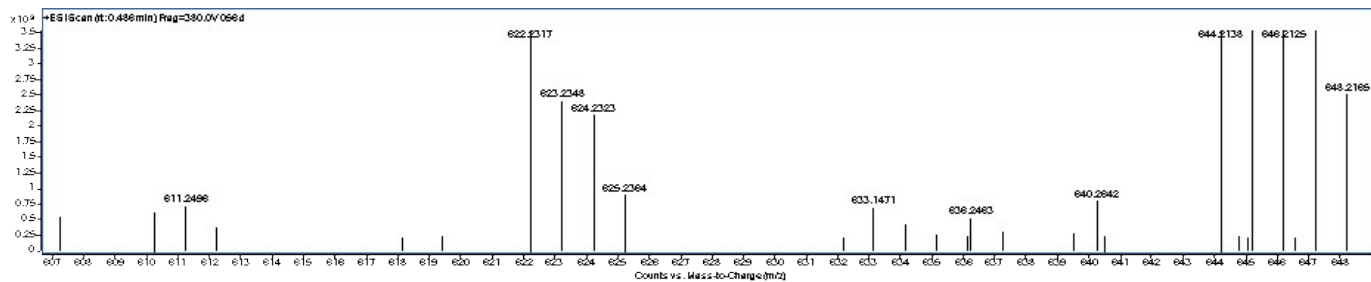

Figure 103. HRMS spectrum of 12r

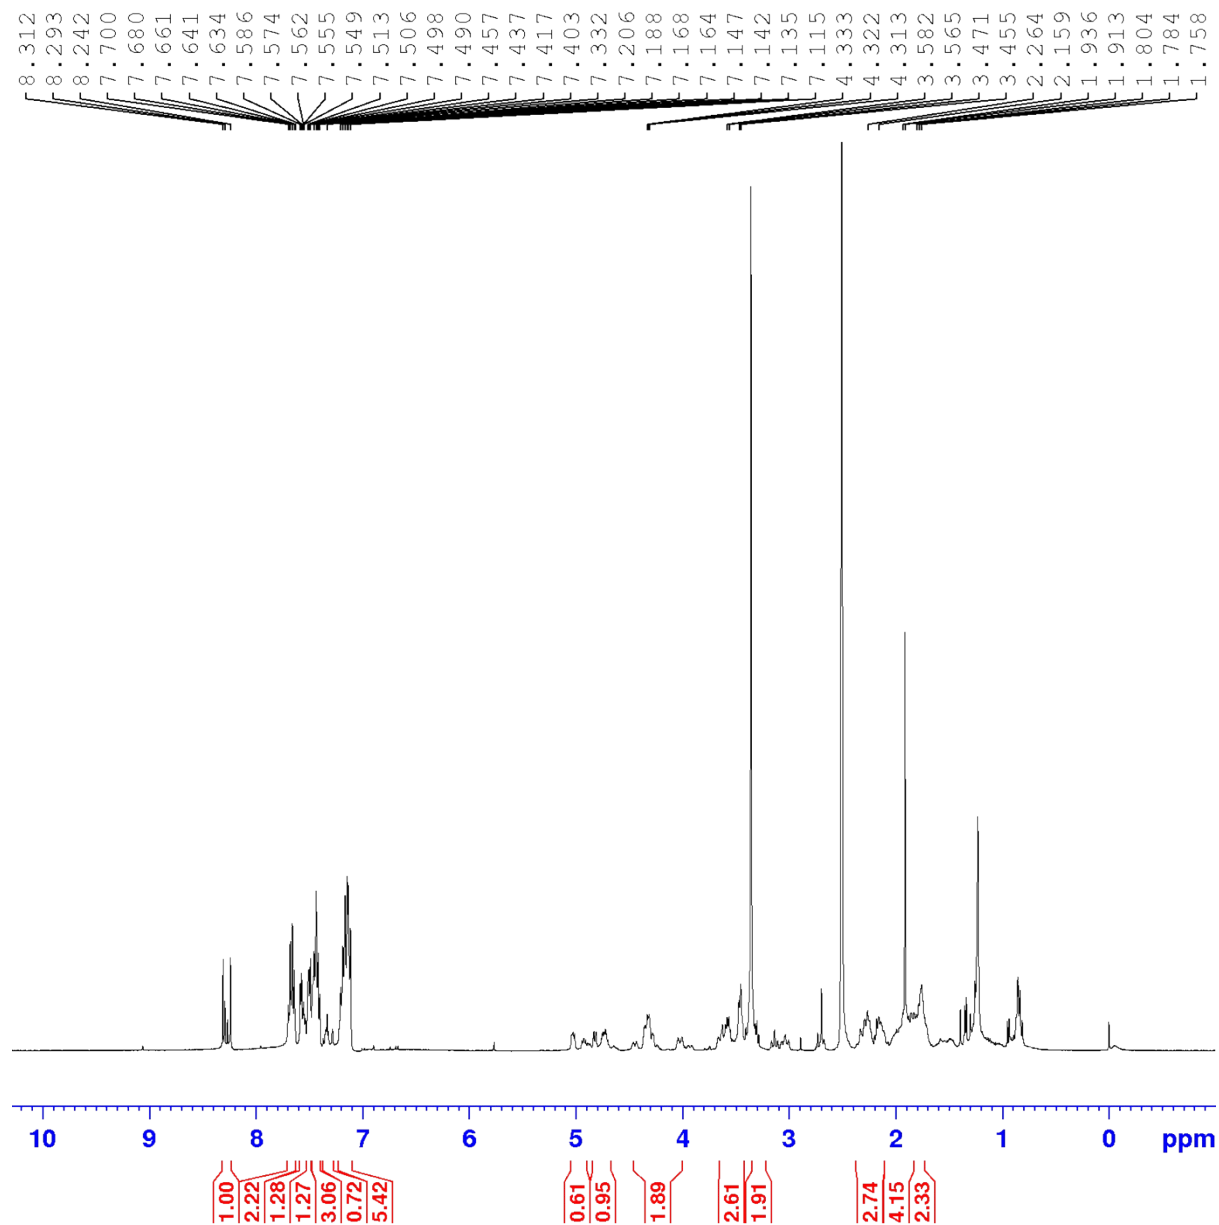

Figure 104. <sup>1</sup>H NMR full spectrum of 12r



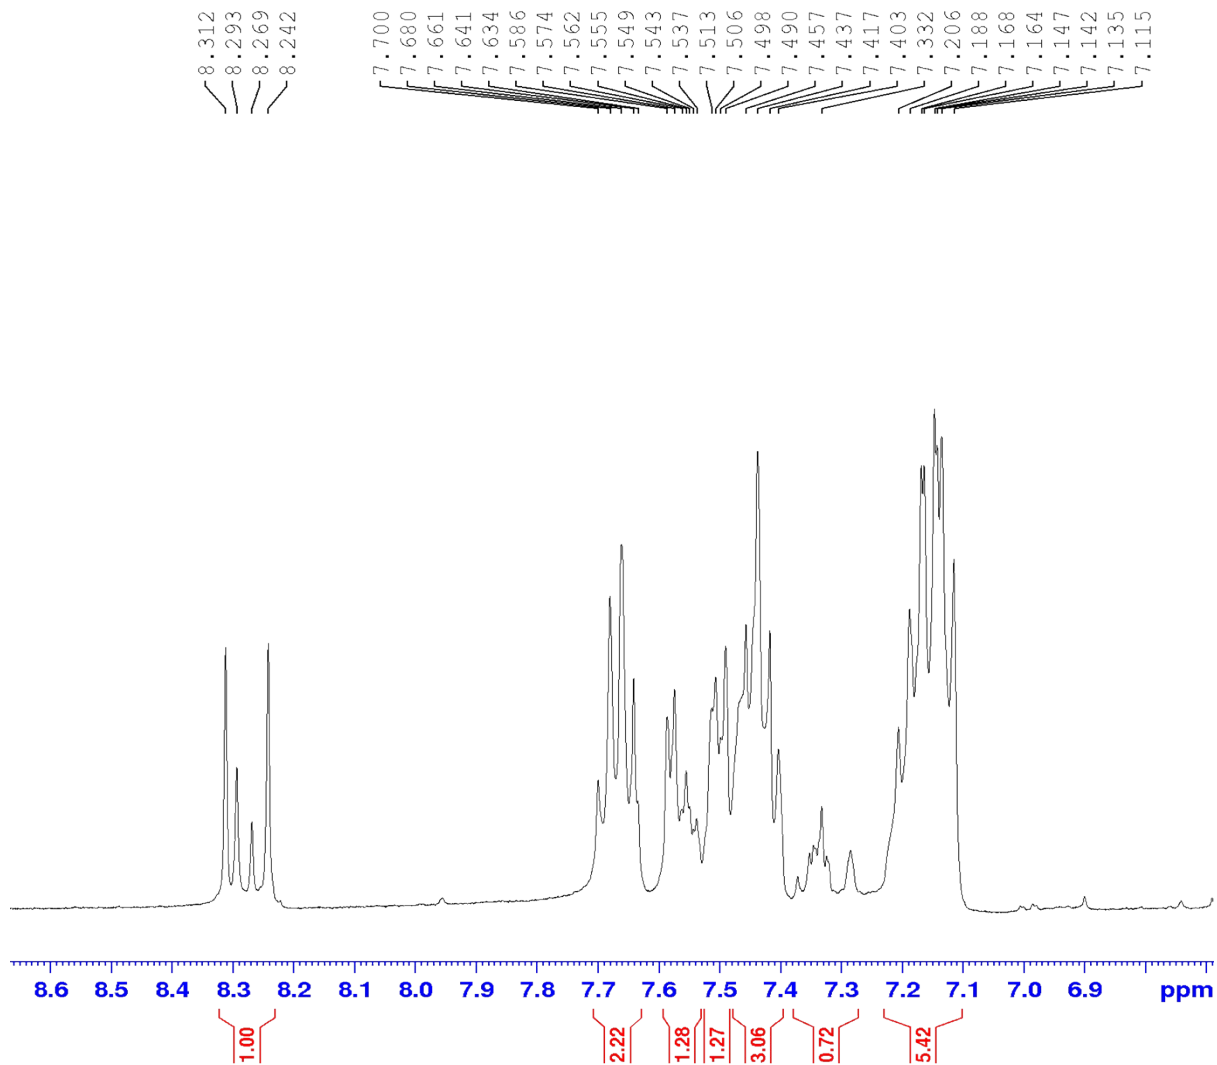

Figure 105. Aromatic region of the  $^1\text{H}$  NMR spectrum for **12r**

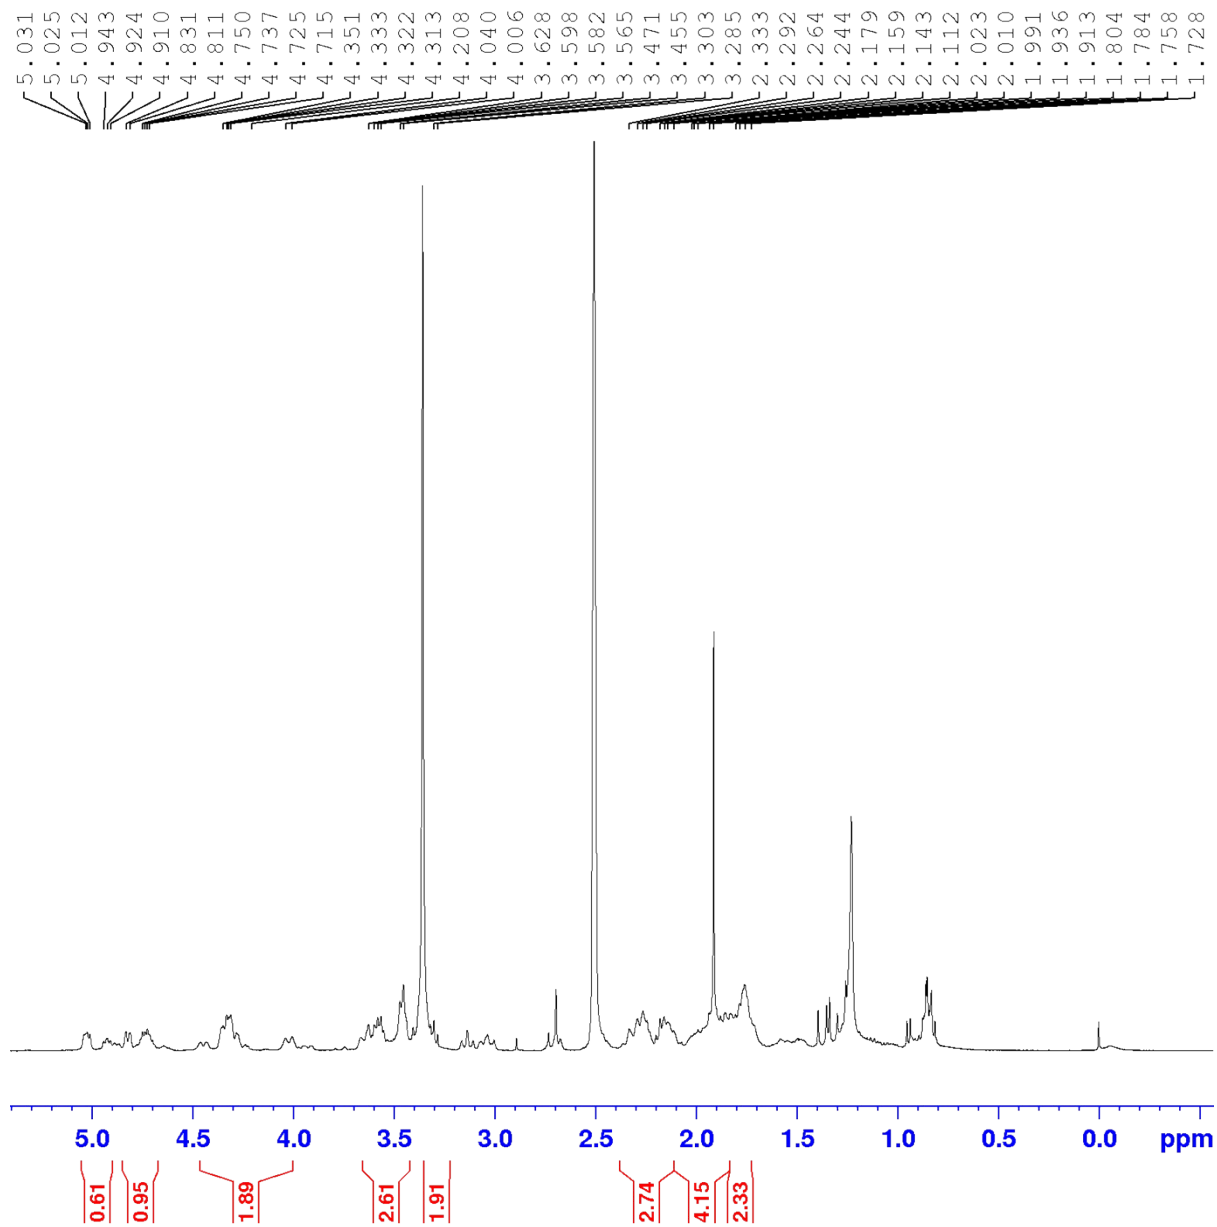

Figure 106. Aliphatic region of the  $^1\text{H}$  NMR spectrum for **12r**

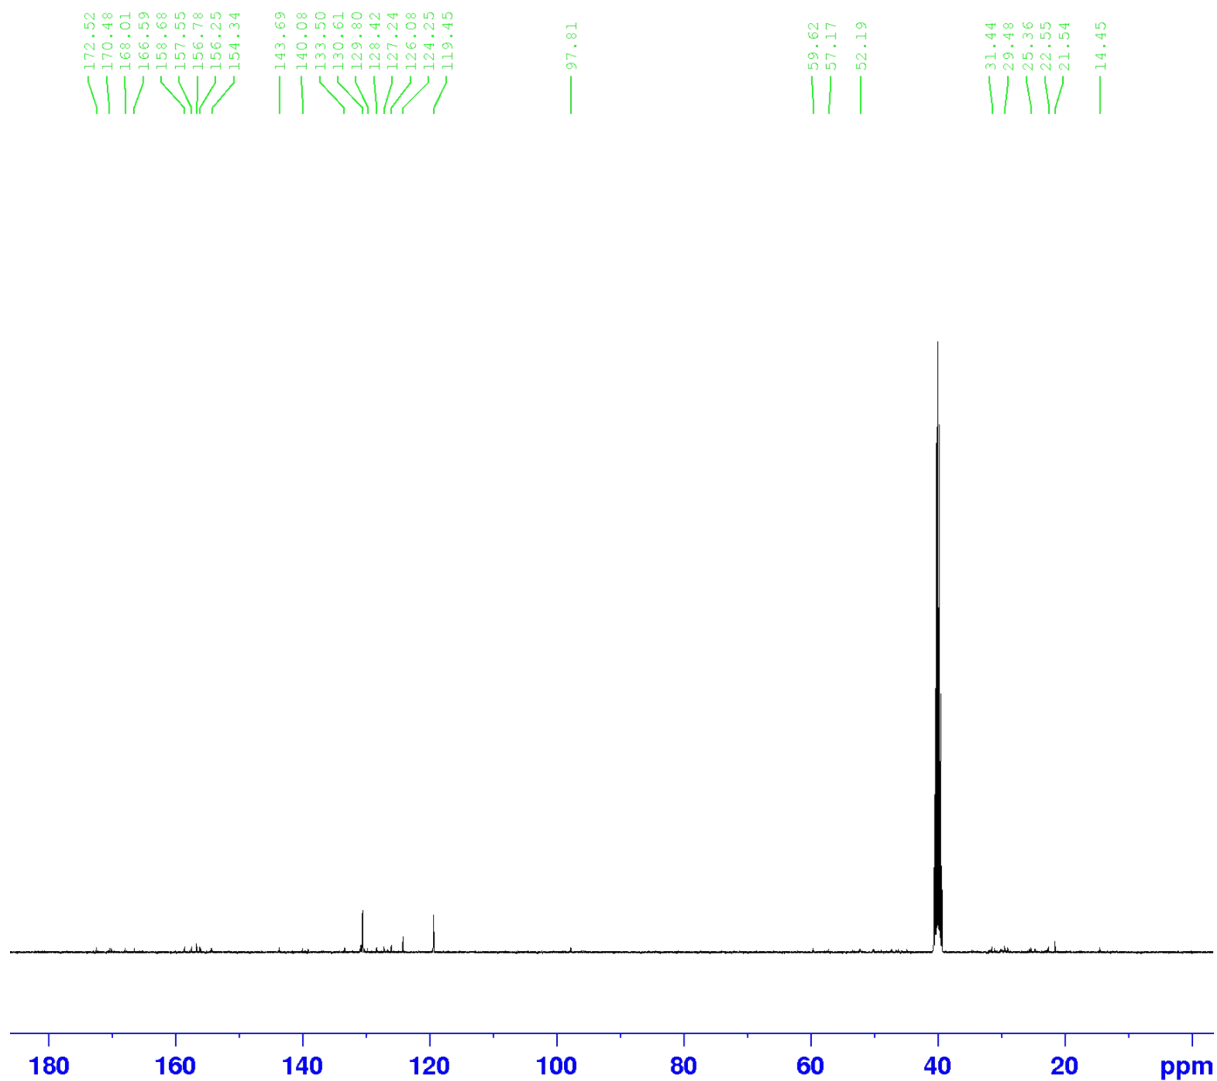

Figure 107.  $^{13}\text{C}$ -NMR spectrum of **12r**

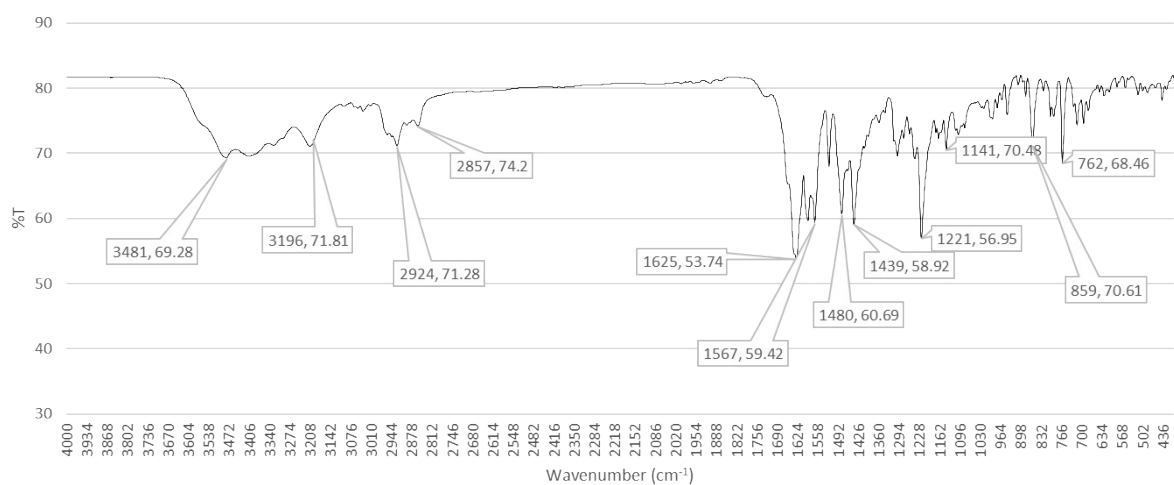

Figure 108. FT-IR spectrum of **12r**

Spectral data of *7-amino-3-((3R)-1-((4-nitrobenzoyl)propyl)piperidin-3-yl)-1-(4-phenoxyphenyl)-1H-pyrazolo[4,3-d]pyrimidine (12s)*

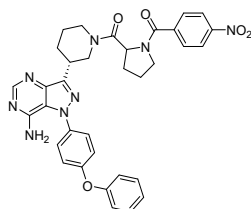

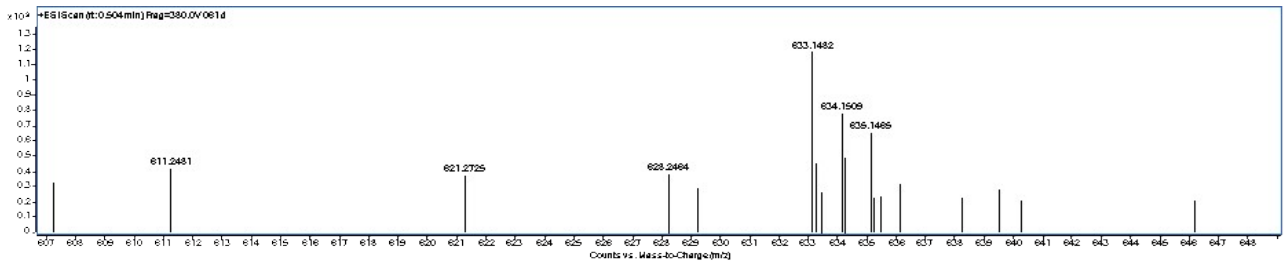

Figure 109. HRMS spectrum of 12s

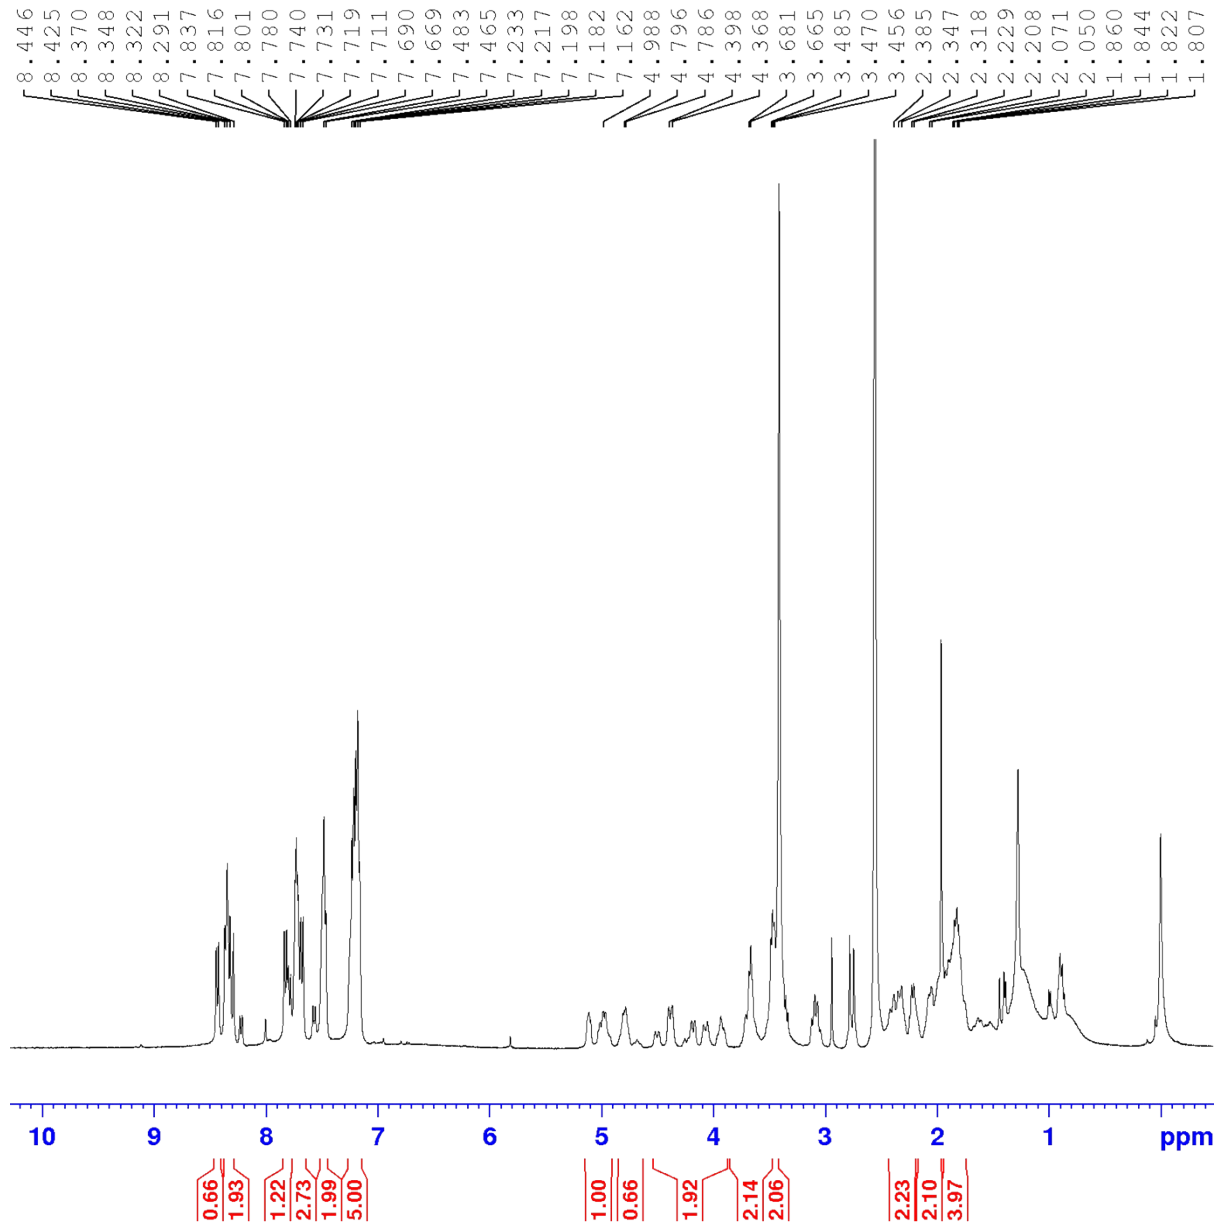

Figure 110. <sup>1</sup>H NMR full spectrum of 12s

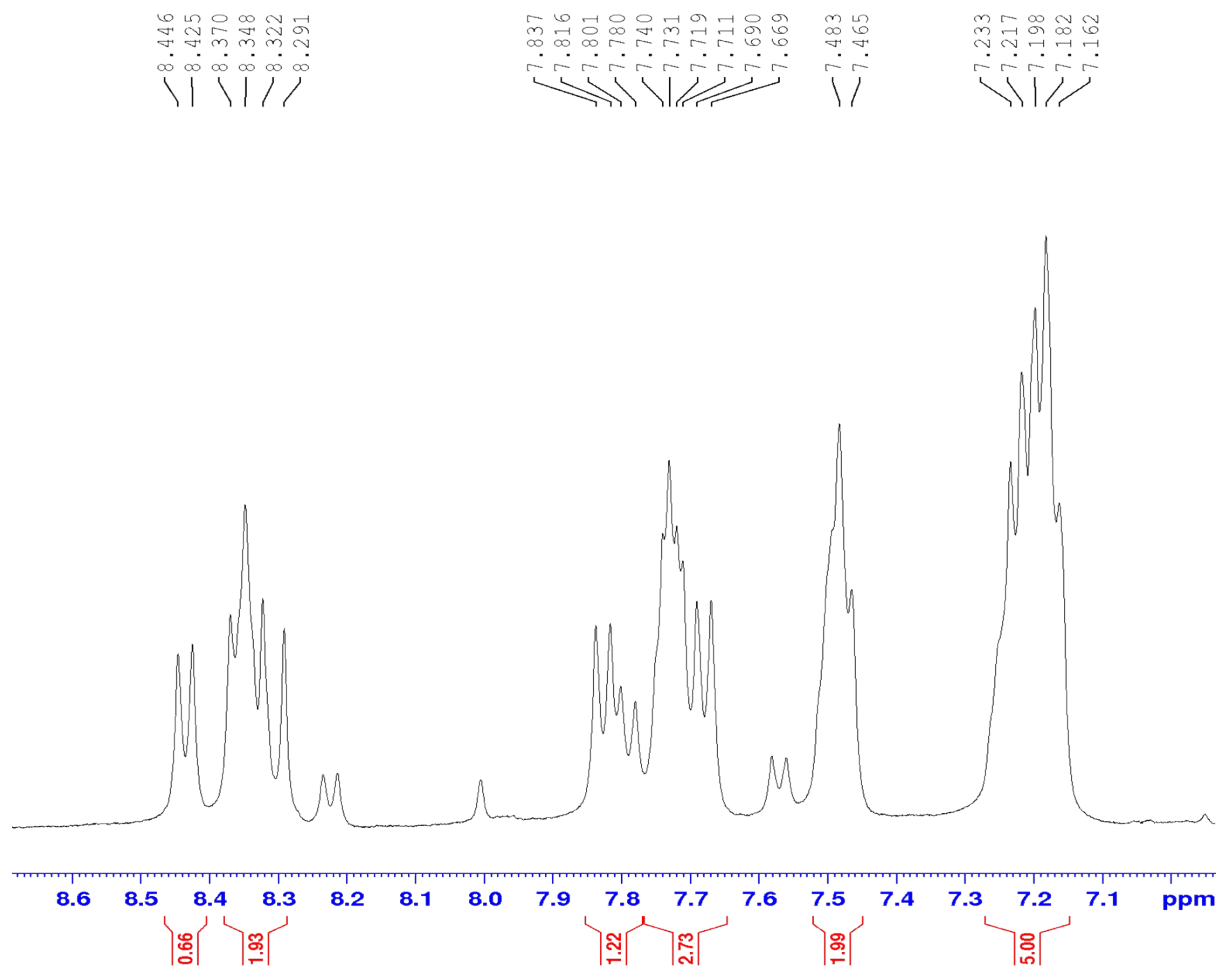

Figure 111. Aromatic region of the  $^1\text{H}$  NMR spectrum for **12s**

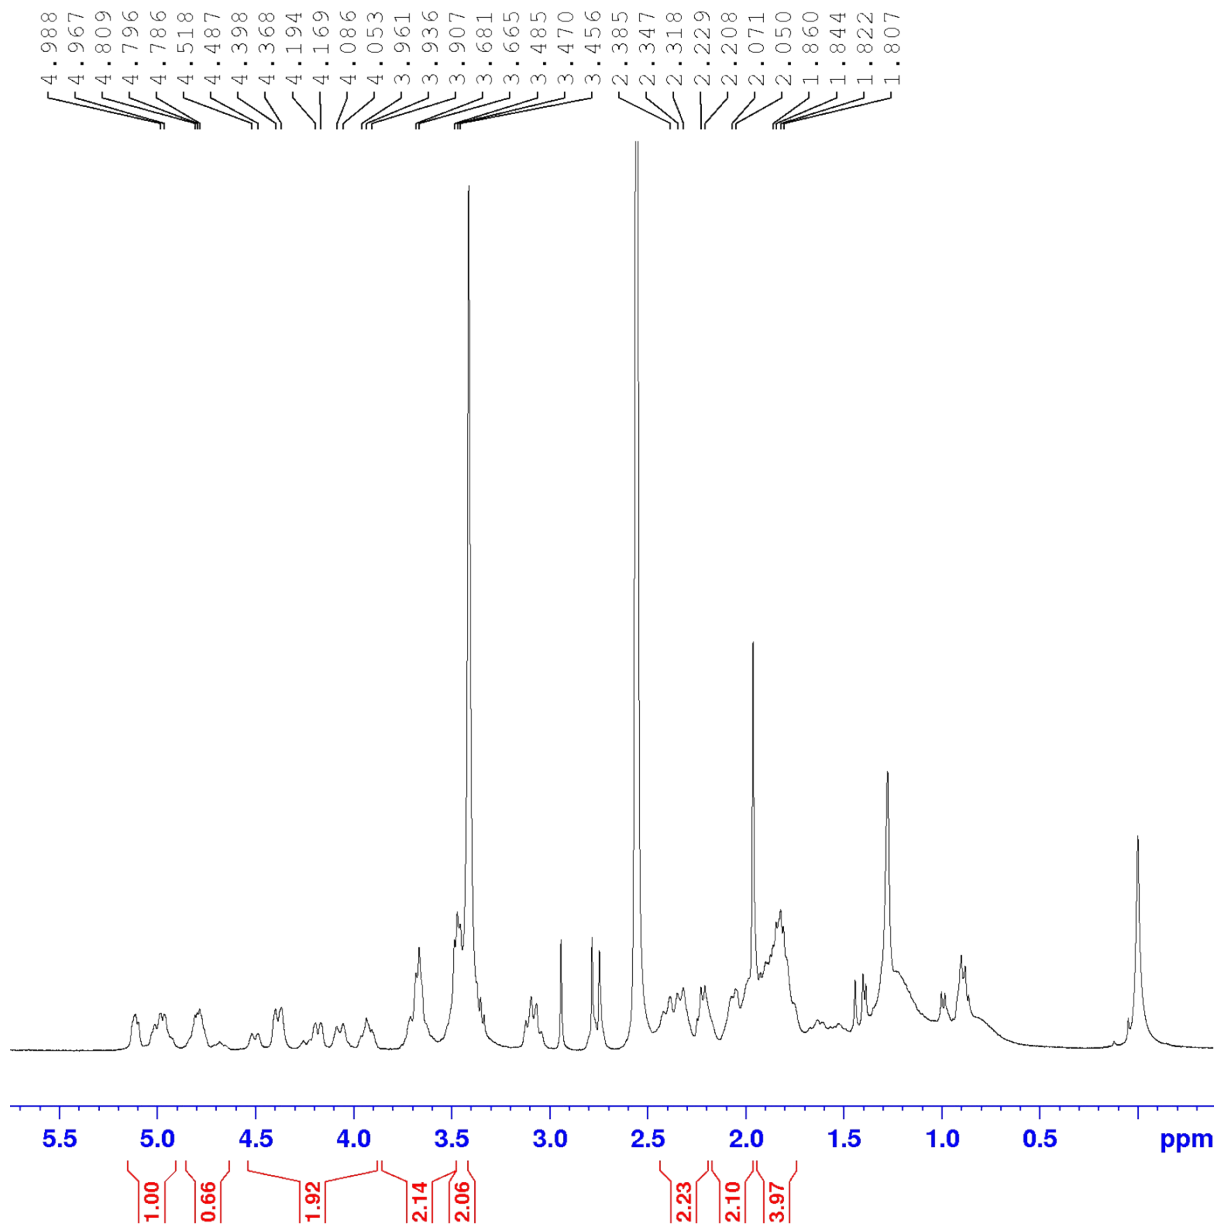

Figure 112. Aliphatic region of the  $^1\text{H}$  NMR spectrum for **12s**

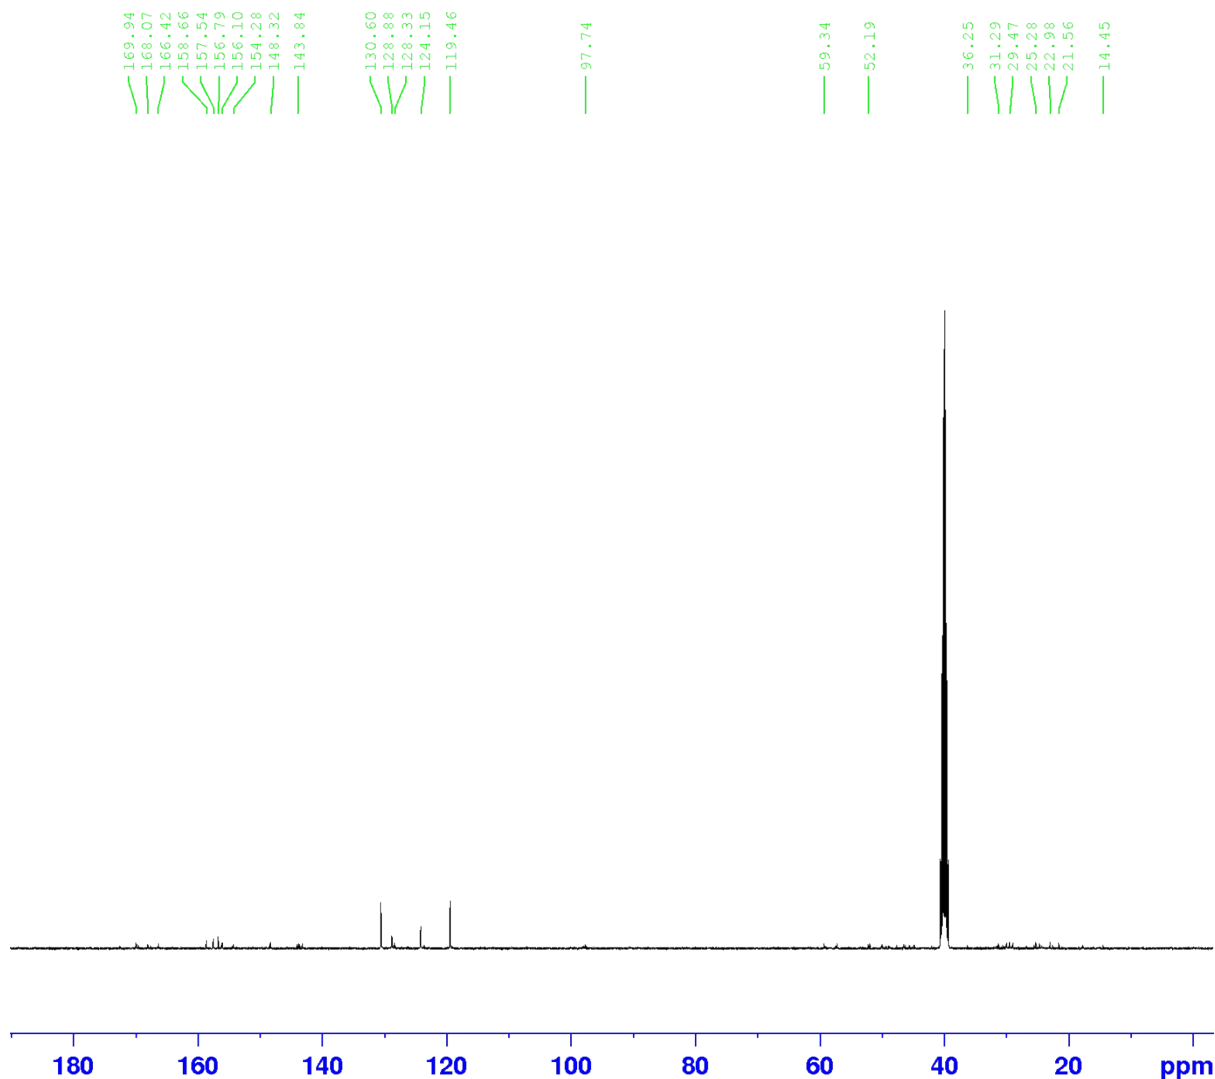

Figure 113.  $^{13}\text{C}$ -NMR spectrum of **12s**

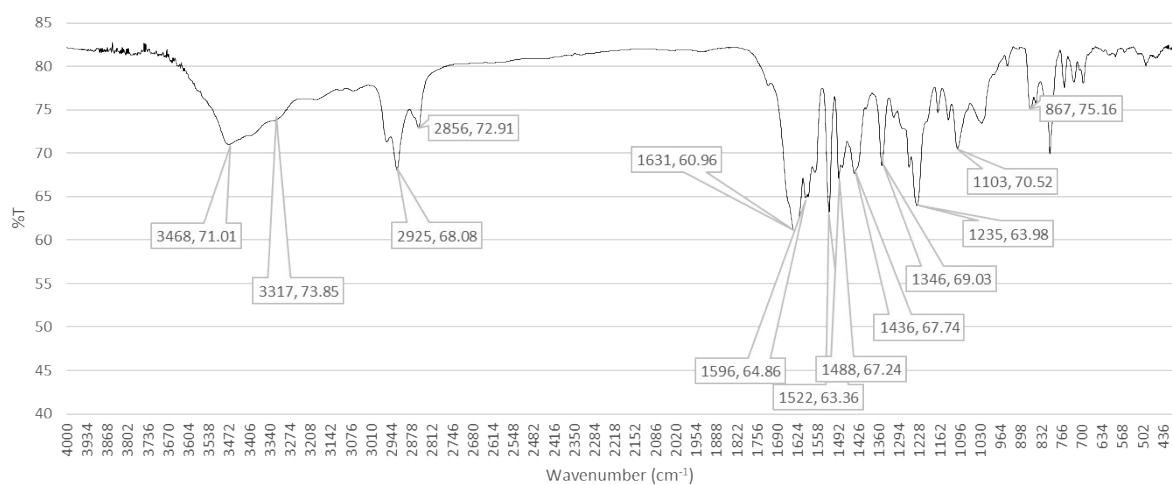

Figure 114. FT-IR spectrum of **12s**

Spectral data of *((R)-3-(7-amino-1-(4-phenoxyphenyl)-1H-pyrazolo[4,3-d]pyrimidin-3-yl)piperidin-1-yl)(1-(5-((6-chloro-2-methylpyrimidin-4-yl)amino)thiazole-2-carbonyl)pyrrolidin-2-yl)methanone (12t)*

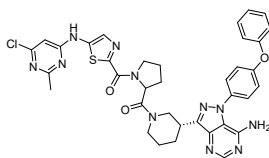

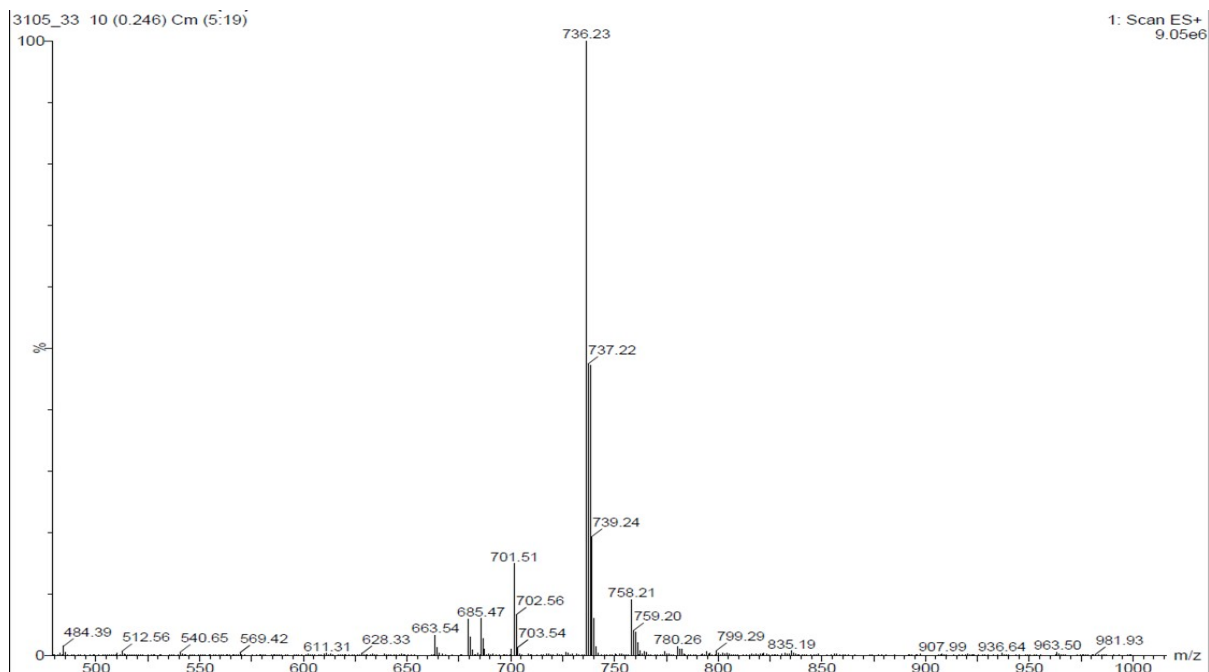

Figure 115. ESI-MS spectrum of **12t**

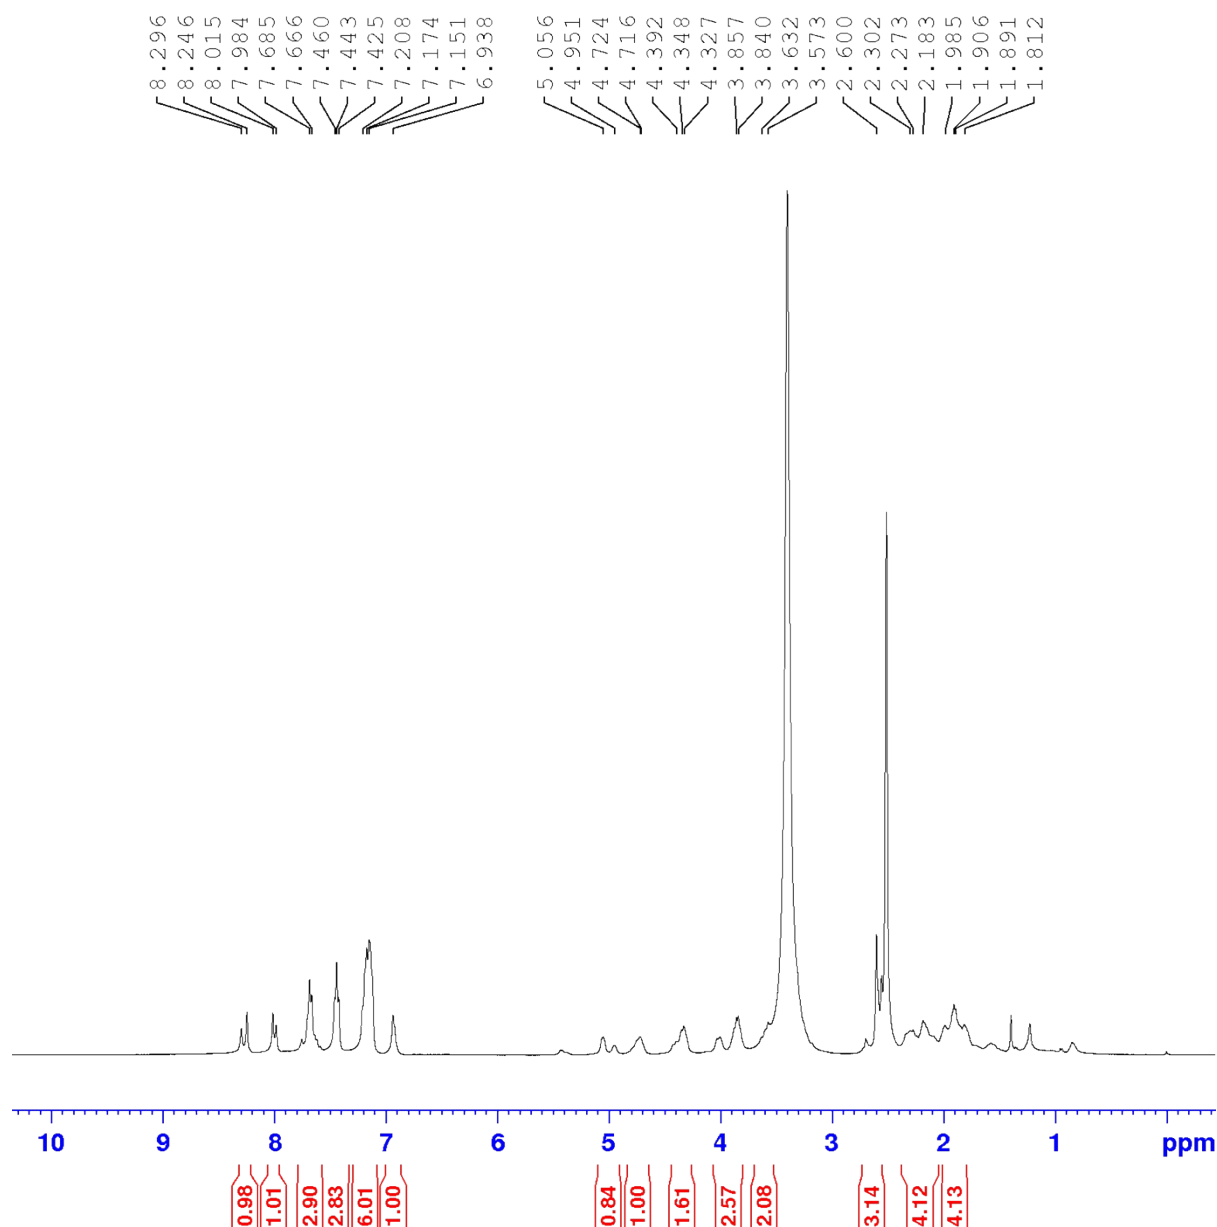

Figure 116.  $^1\text{H}$  NMR full spectrum of **12t**



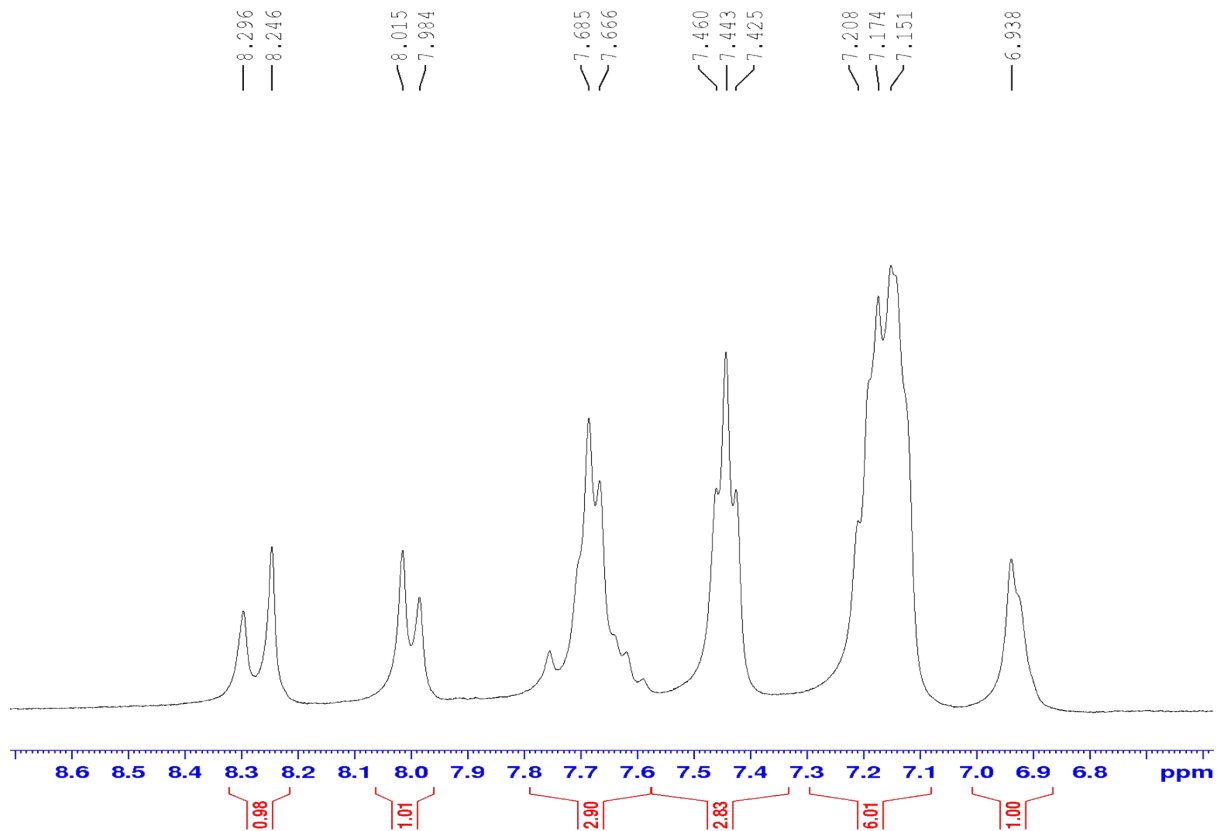

Figure 117. Aromatic region of the  $^1\text{H}$  NMR spectrum for **12t**

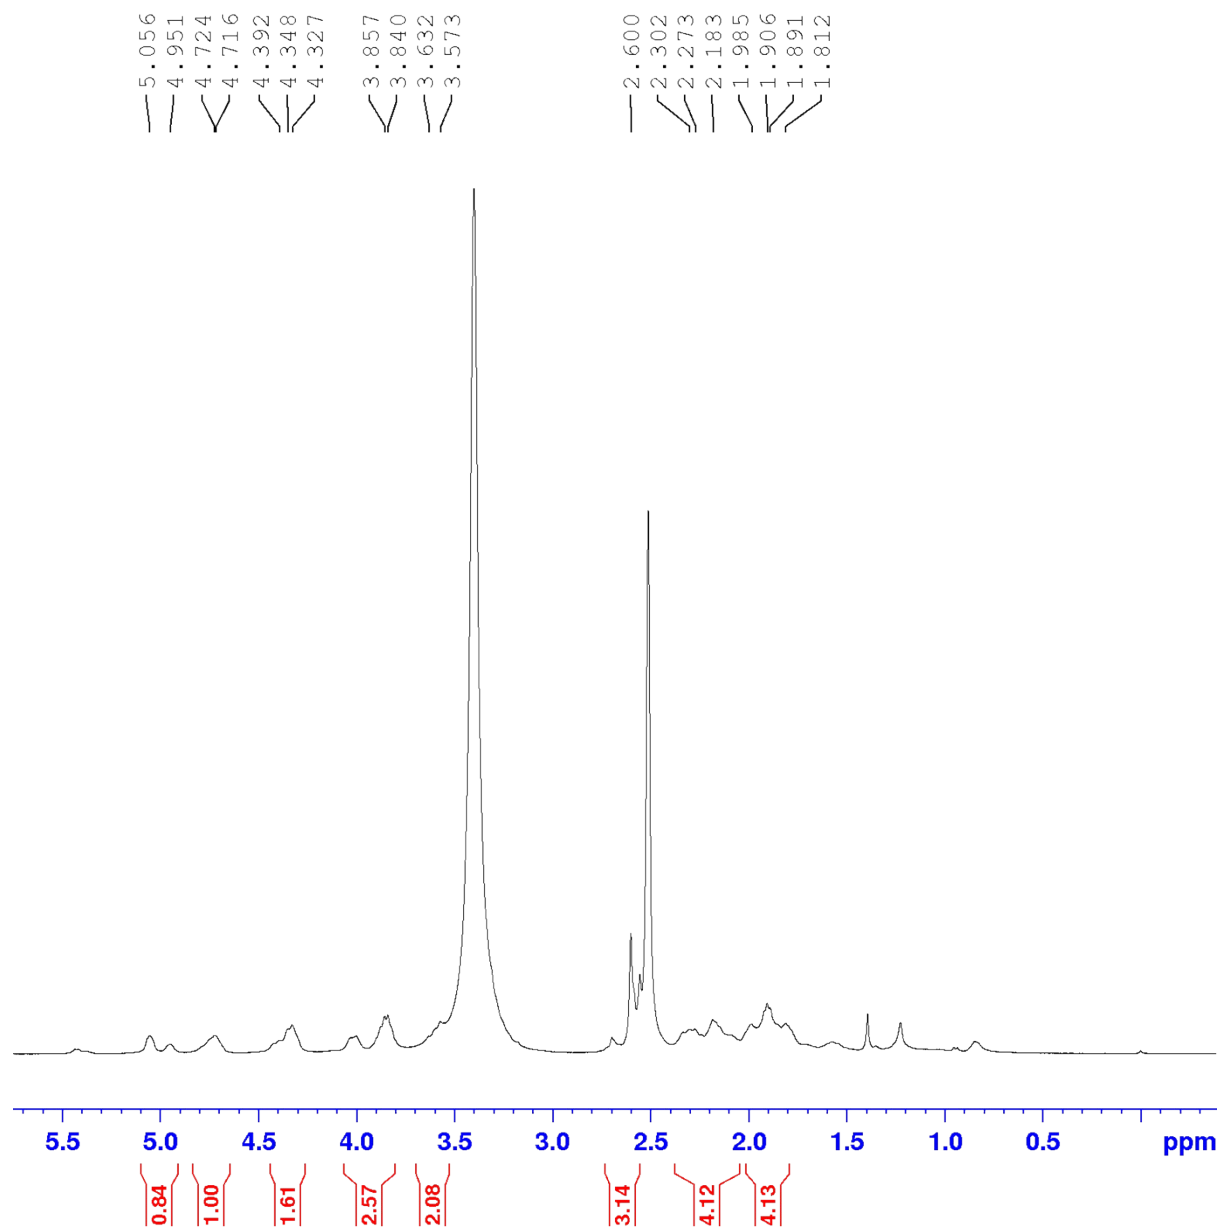

Figure 118. Aliphatic region of the <sup>1</sup>H NMR spectrum for **12t**

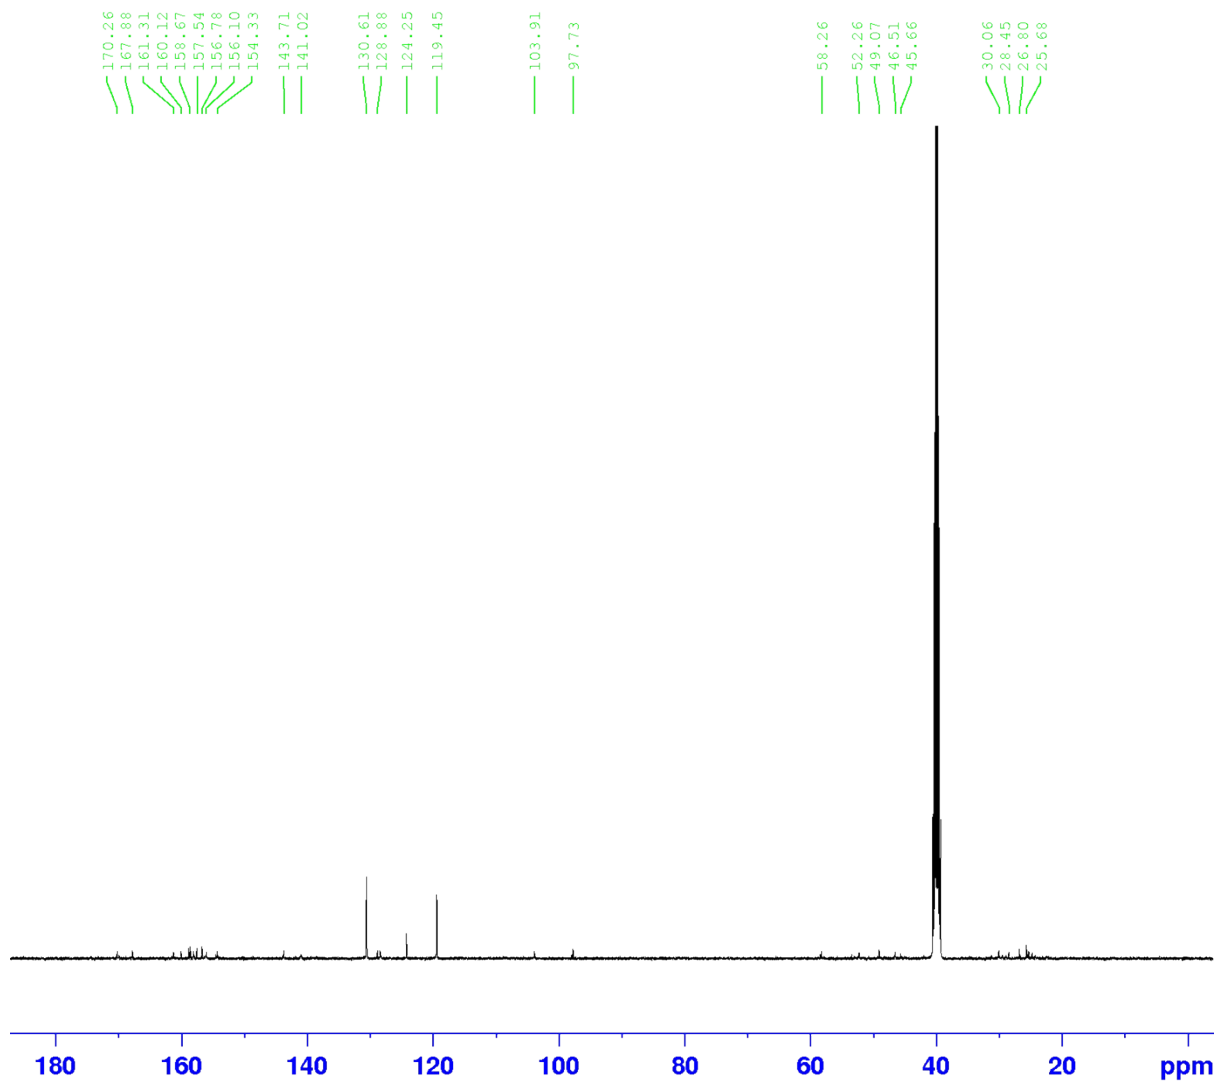

Figure 119.  $^{13}\text{C}$ -NMR spectrum of **12t**

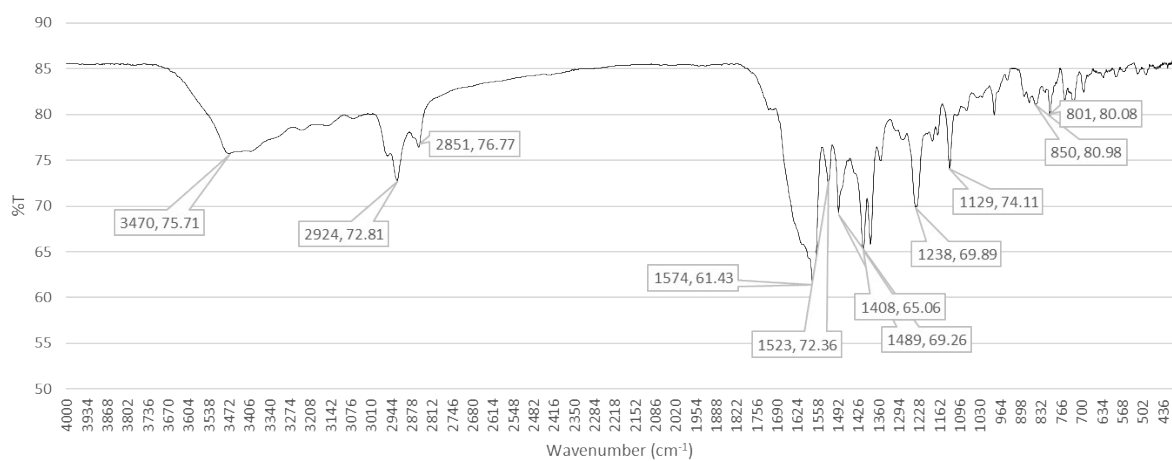

Figure 120. FT-IR spectrum of **12t**

Spectral data of ((S)-3-(4-amino-3-(3-phenoxyphenyl)-1H-pyrazolo[3,4-d]pyrimidin-1-yl)piperidin-1-yl)(pyrrolidin-3-yl)methanone (**11**)

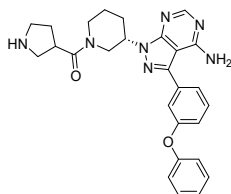

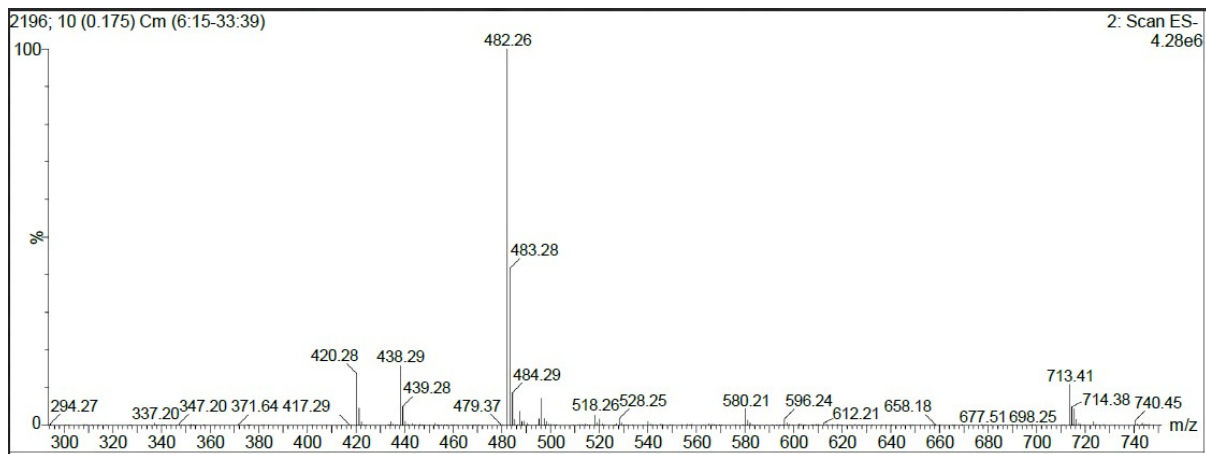

Figure 121. ESI-MS spectrum of **11**

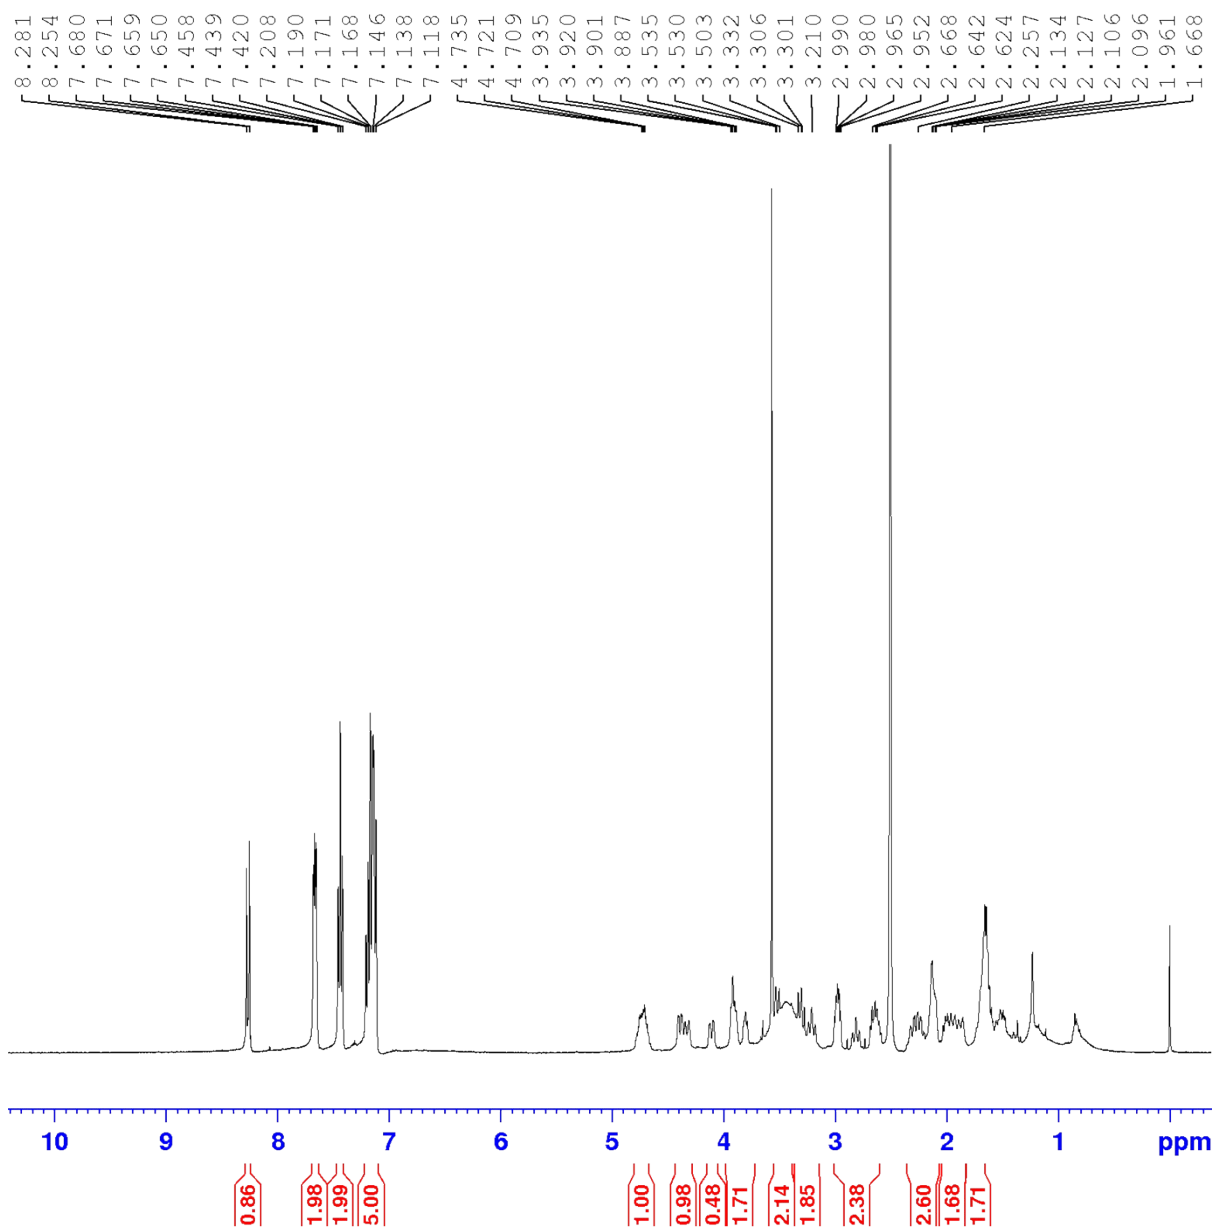

Figure 122.  $^1\text{H}$  NMR full spectrum of **11**

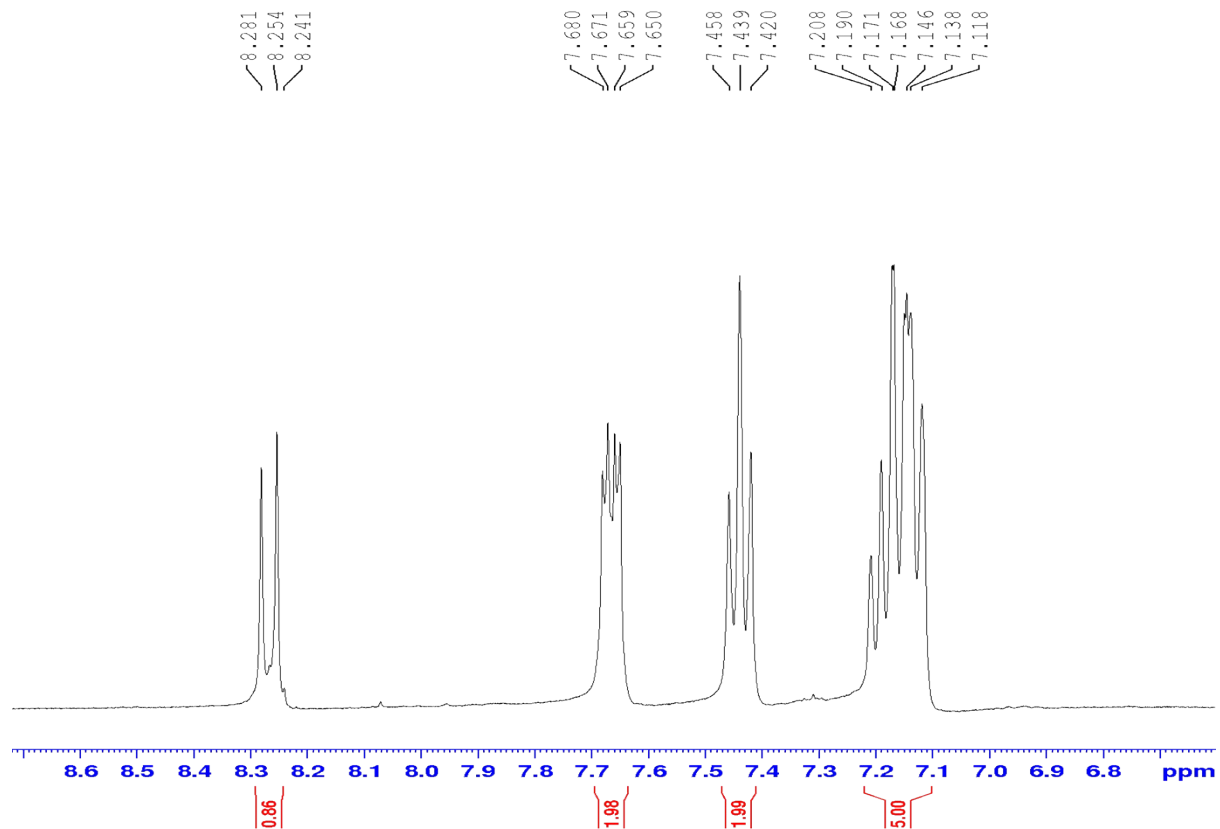

Figure 123. Aromatic region of the  $^1\text{H}$  NMR spectrum for **11**

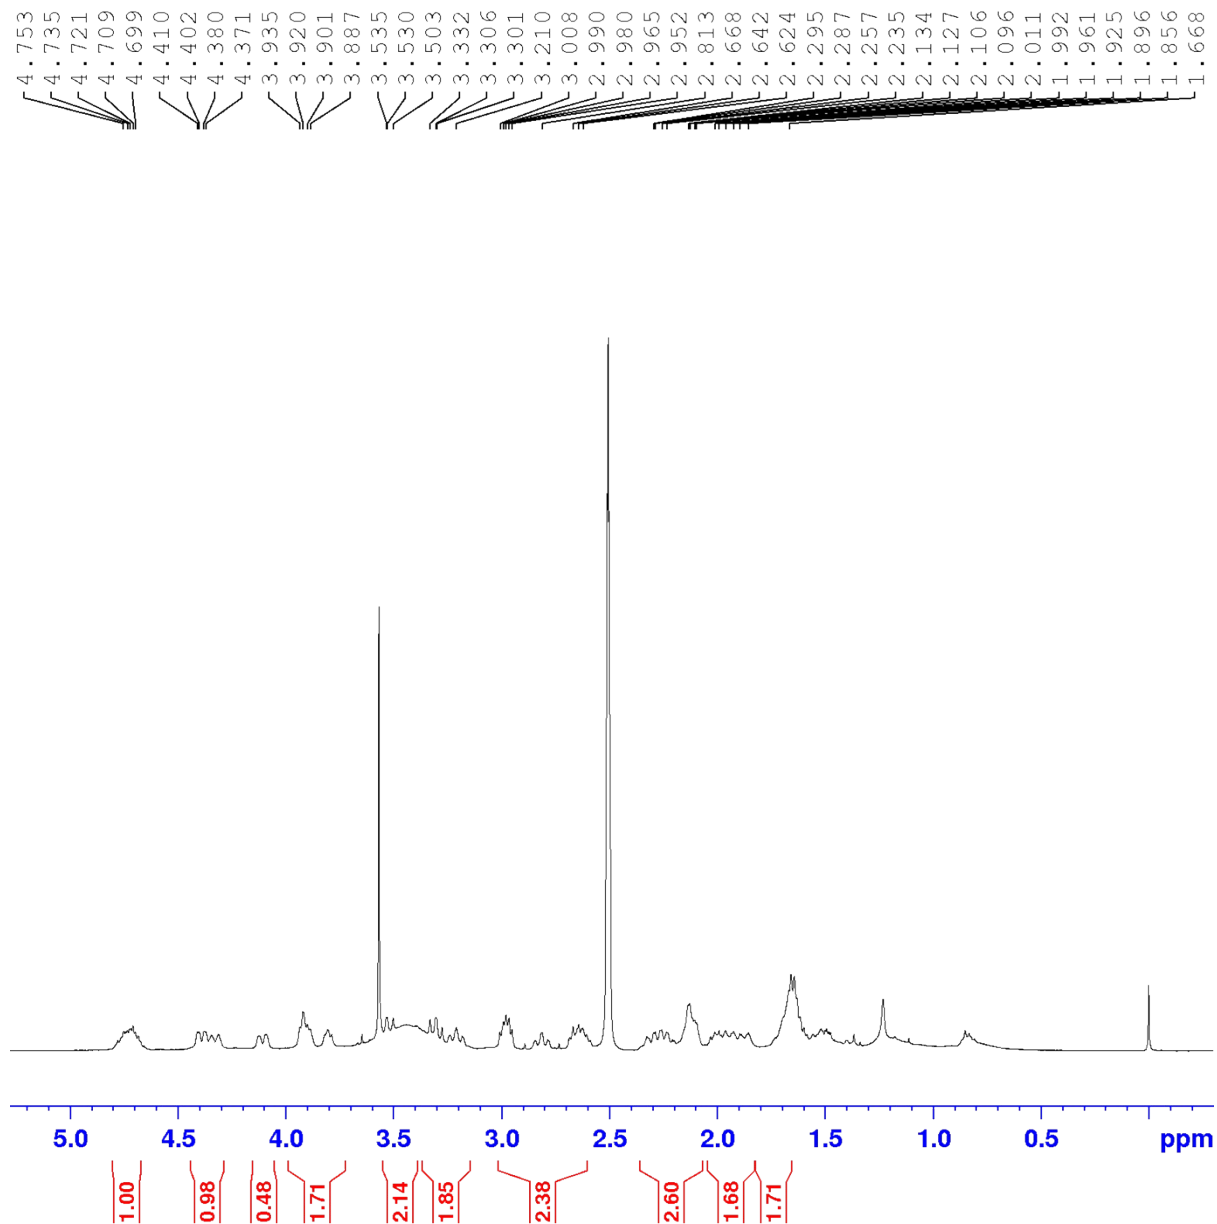

Figure 124. Aliphatic region of the  $^1\text{H}$  NMR spectrum for **11**

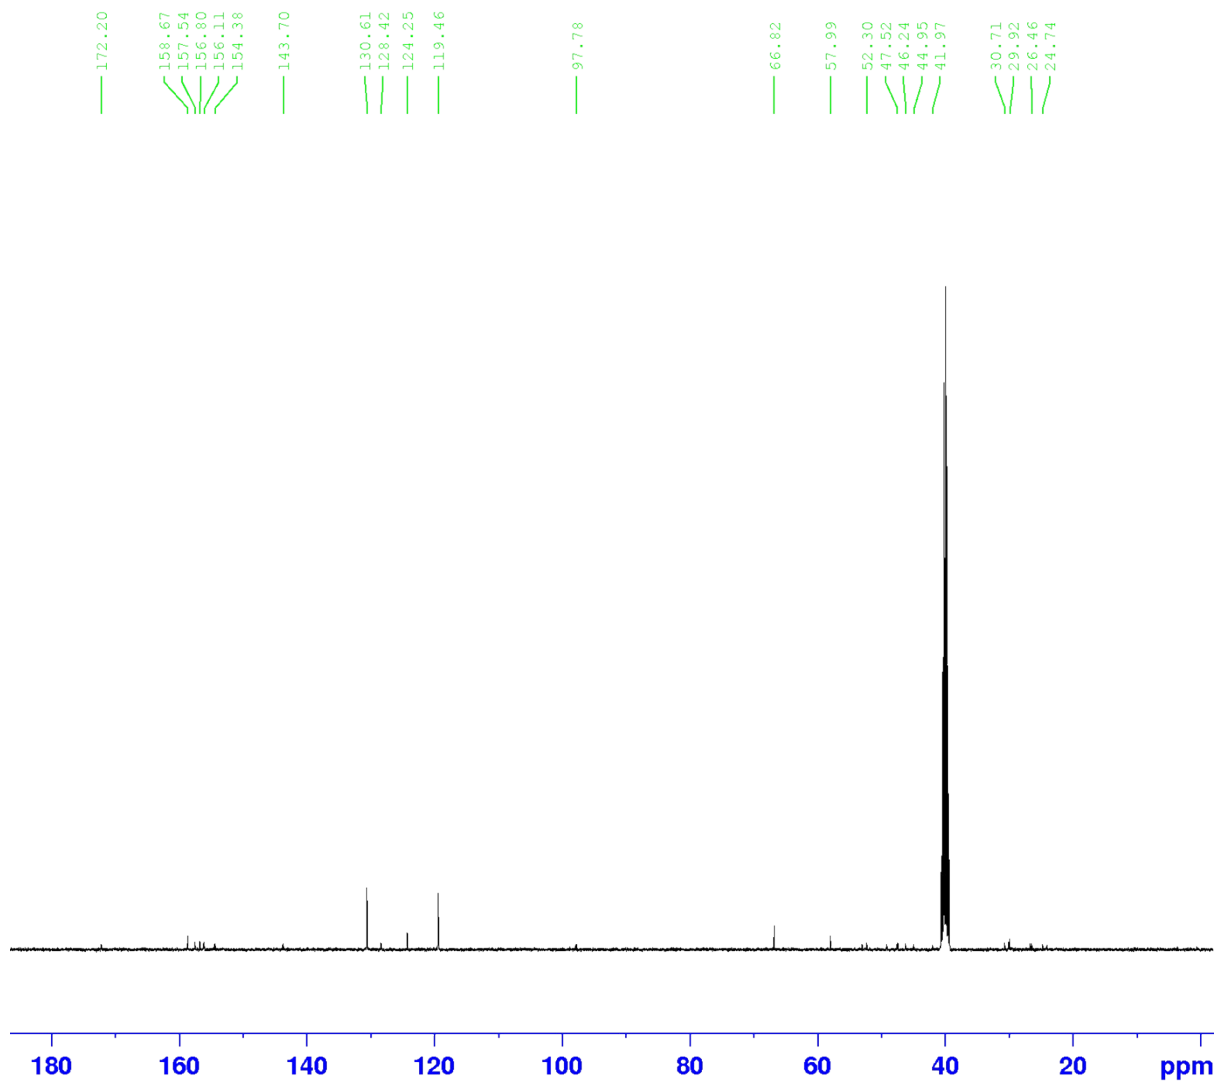

Figure 125.  $^{13}\text{C}$ -NMR spectrum of **11**

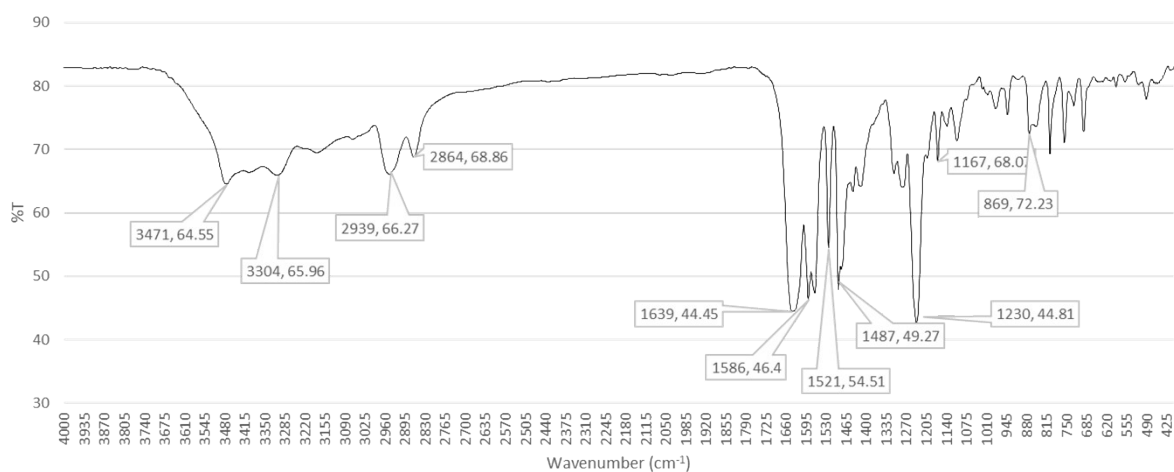

Figure 126. FT-IR spectrum of **11**

Spectral data of **tert-butyl 3-((S)-3-(4-amino-3-(3-phenoxyphenyl)-1H-pyrazolo[3,4-d]pyrimidin-1-yl)piperidine-1-carbonyl)pyrrolidine-1-carboxylate (10)**

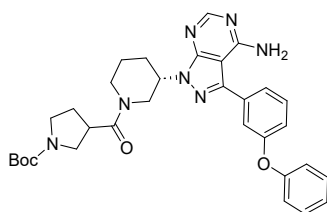

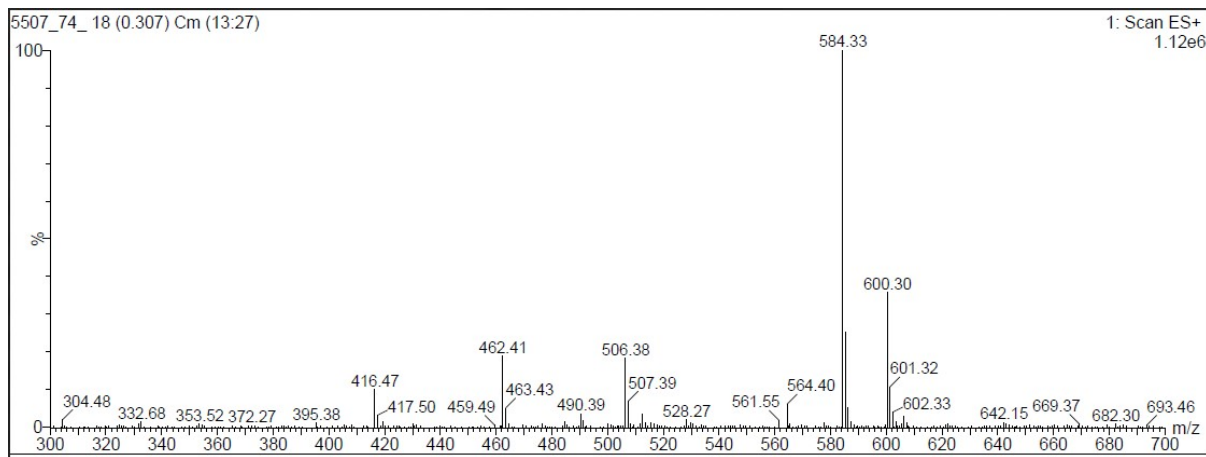

Figure 127. ESI-MS spectrum of **10**

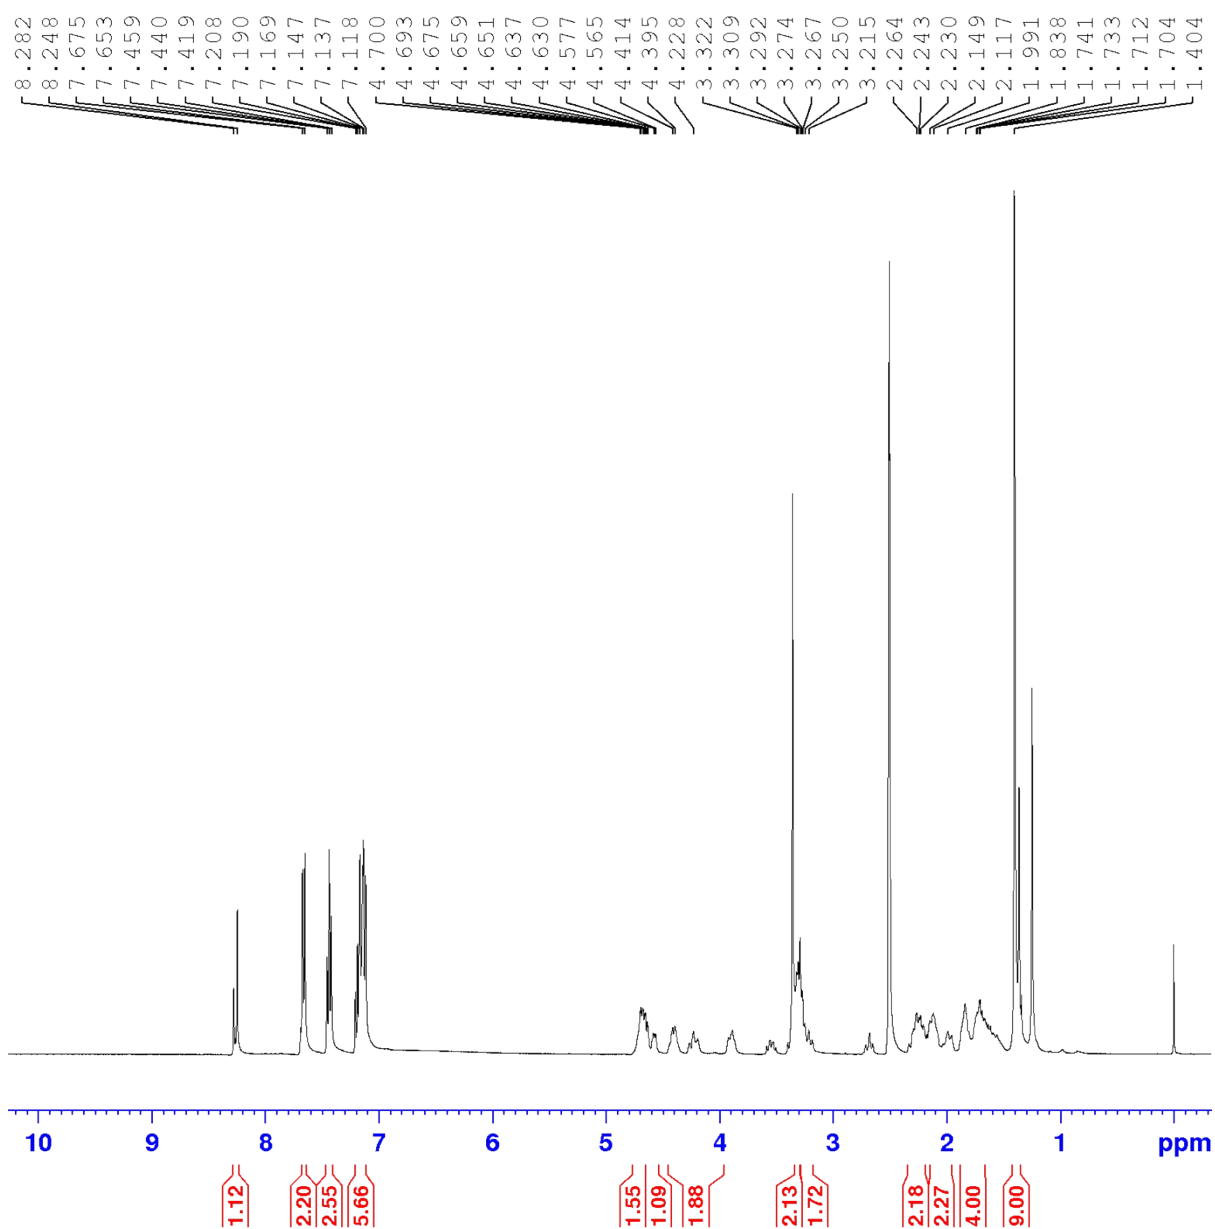

Figure 128.  $^1\text{H}$  NMR spectrum of **10**



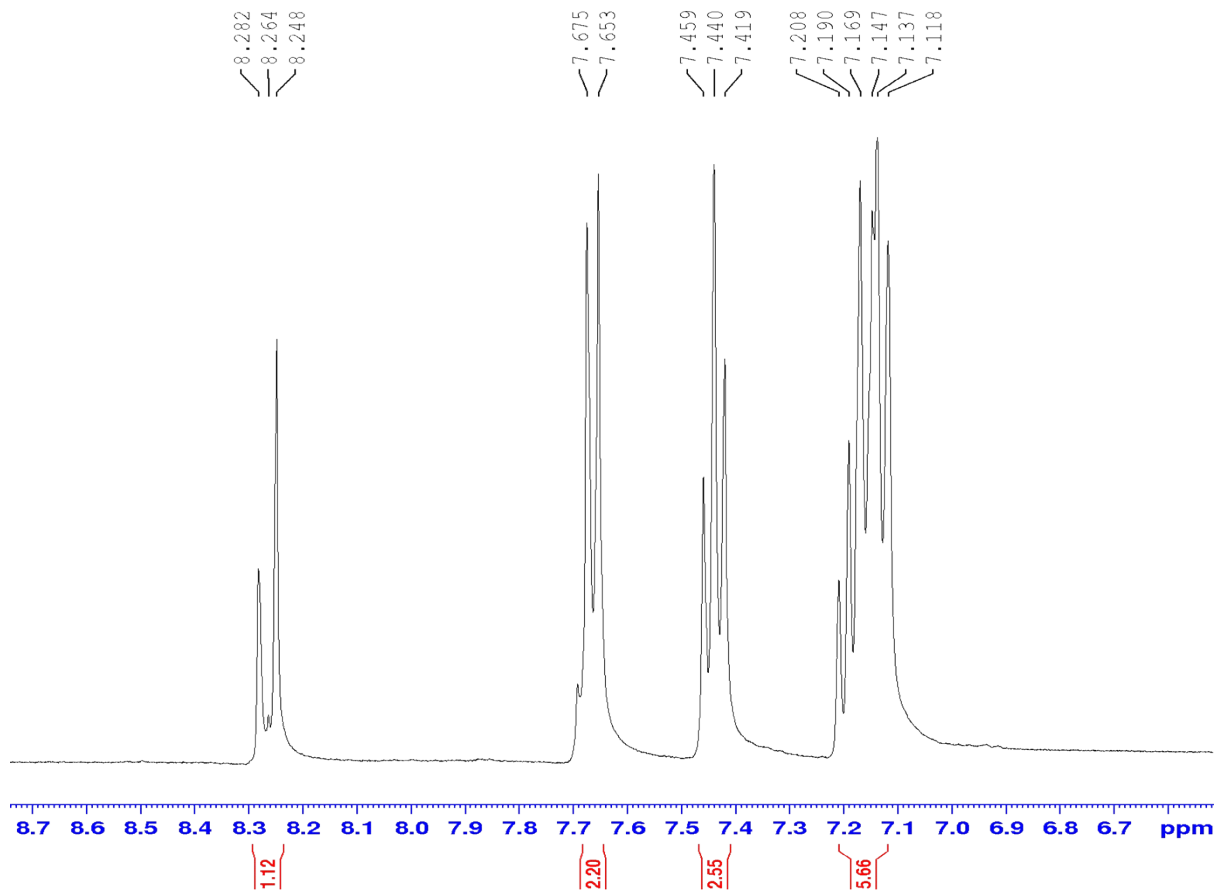

Figure 129. Aromatic region of the  $^1\text{H}$  NMR spectrum for **10**

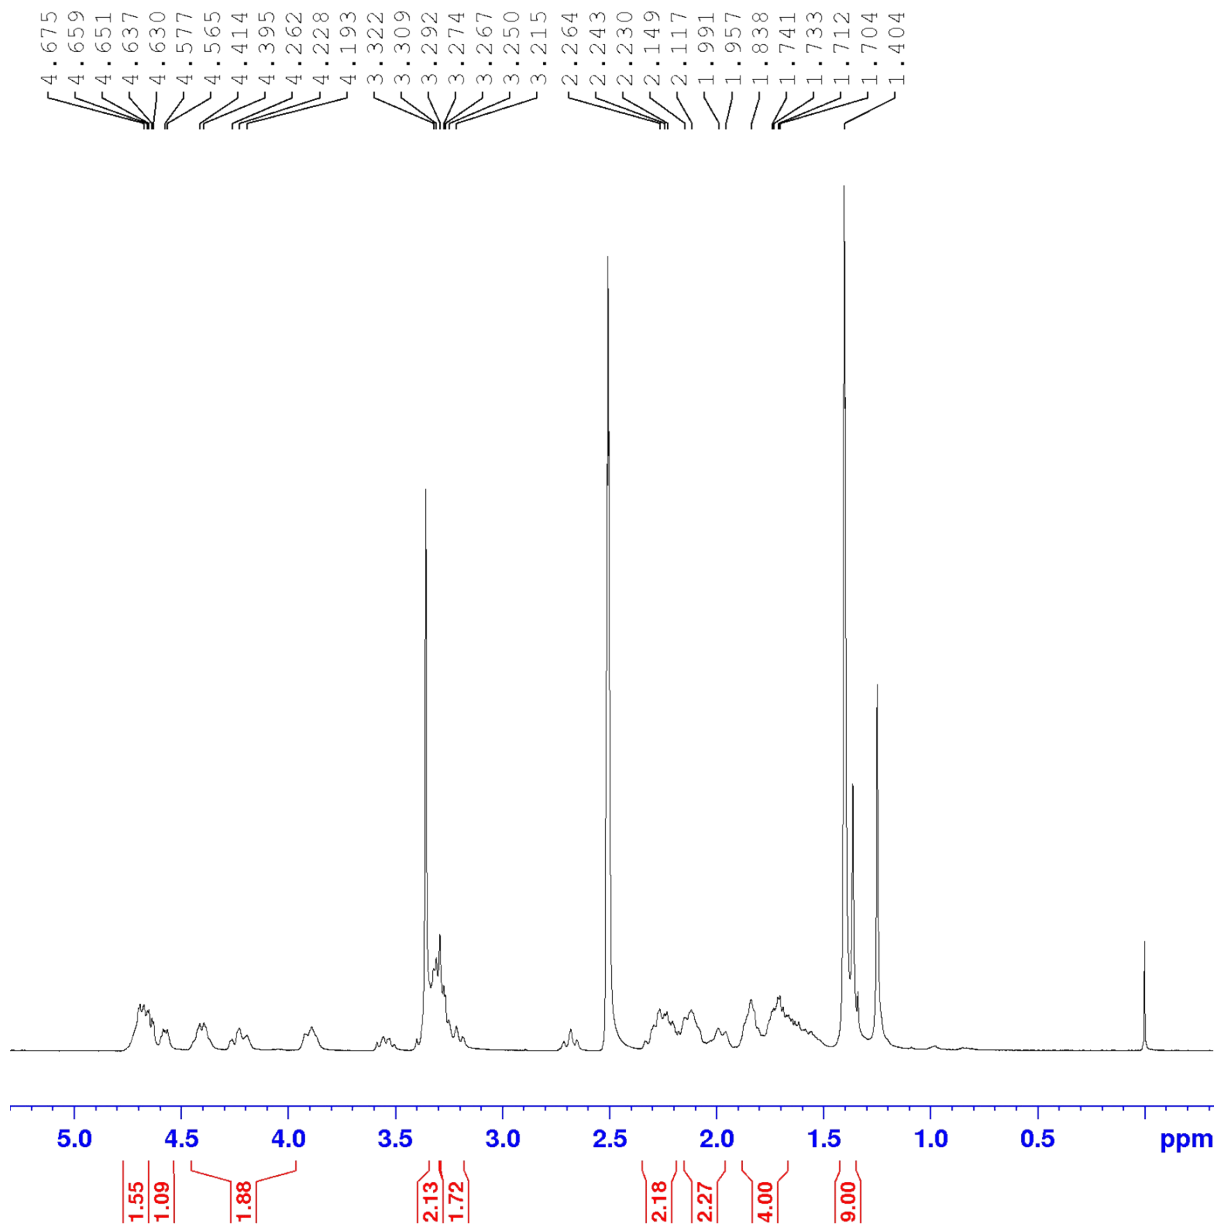

Figure 130. Aliphatic region of the  $^1\text{H}$  NMR spectrum for **10**

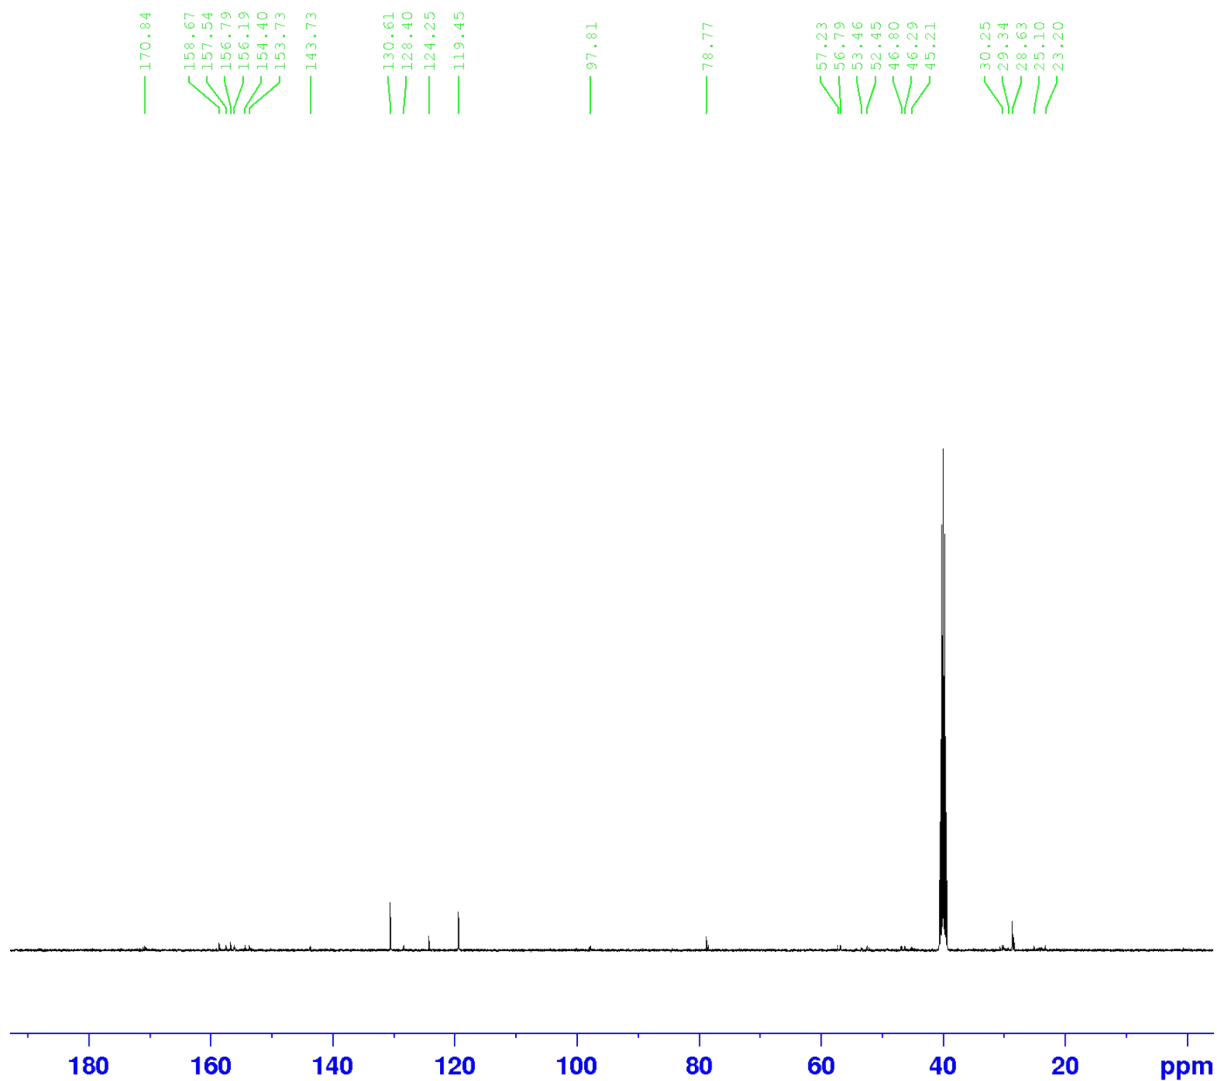

Figure 131.  $^{13}\text{C}$ -NMR spectrum of **10**

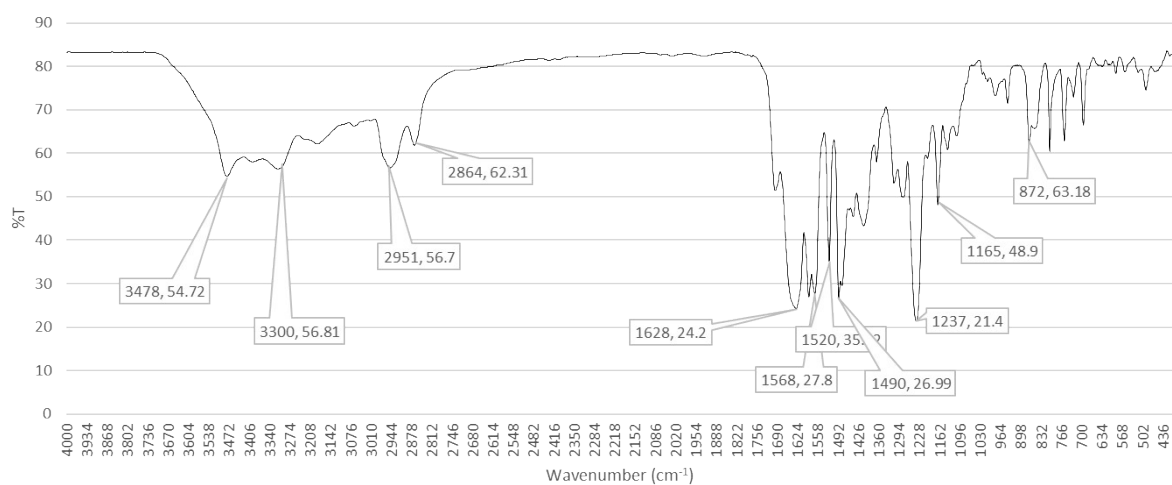

Figure 132. FT-IR spectrum of **10**

Spectral data of **(S)-3-(3-phenoxyphenyl)-1-(piperidin-3-yl)-1H-pyrazolo[3,4-d]pyrimidin-4-amine (8)**

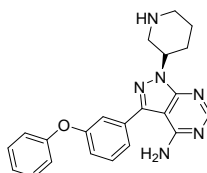

Figure 133. ESI-MS spectrum of **8**

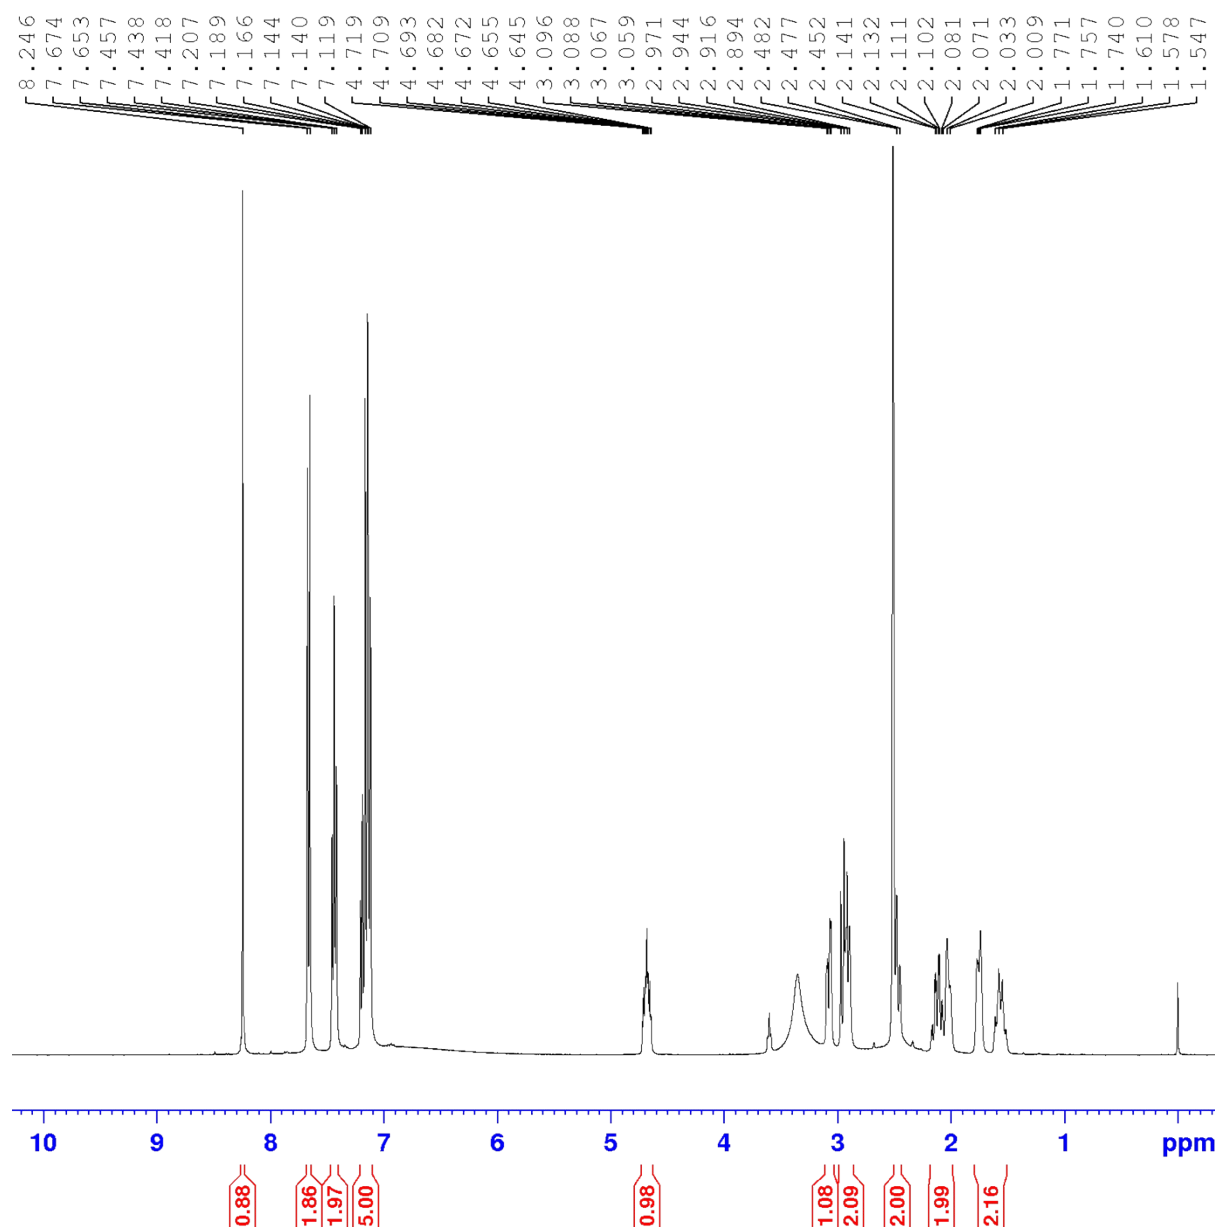

Figure 134. <sup>1</sup>H NMR full spectrum of **8**

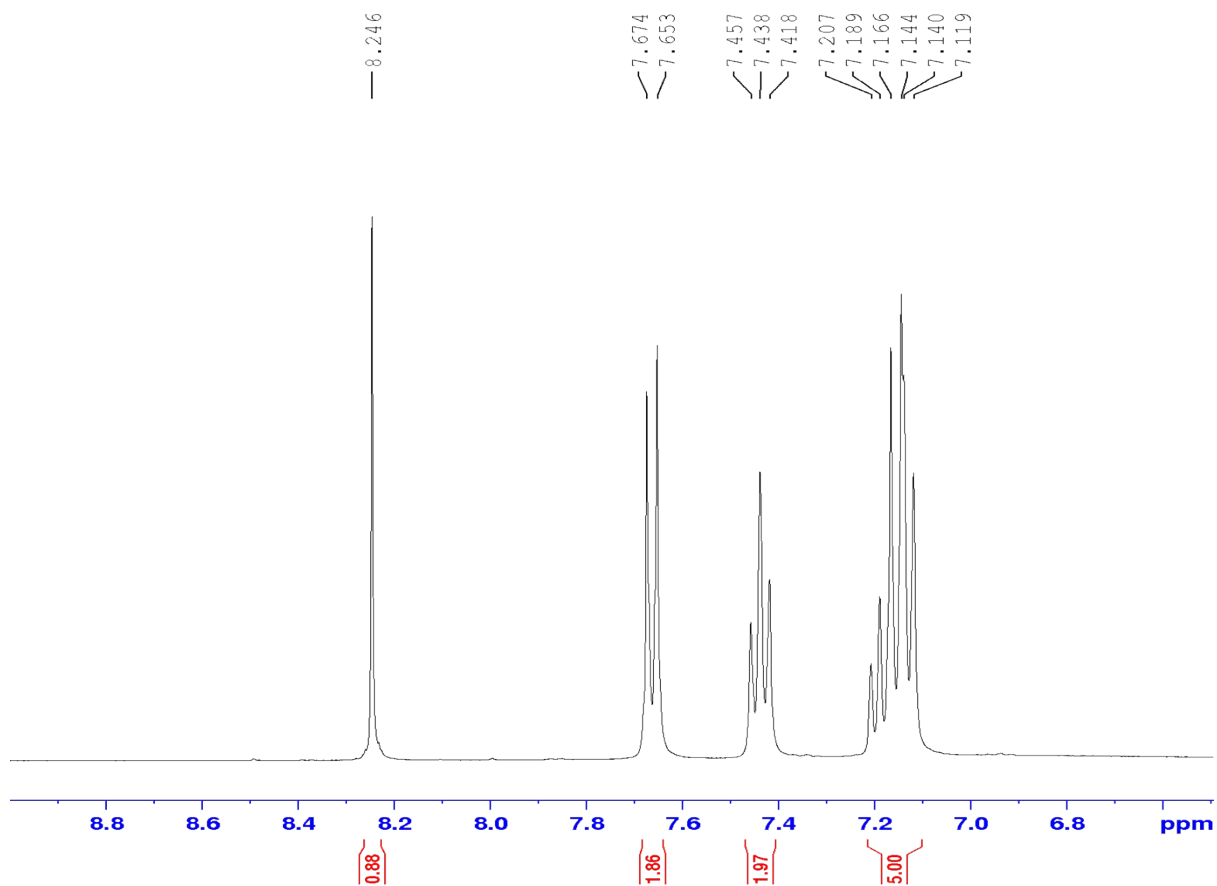

Figure 135. Aromatic region of the  $^1\text{H}$  NMR spectrum for **8**

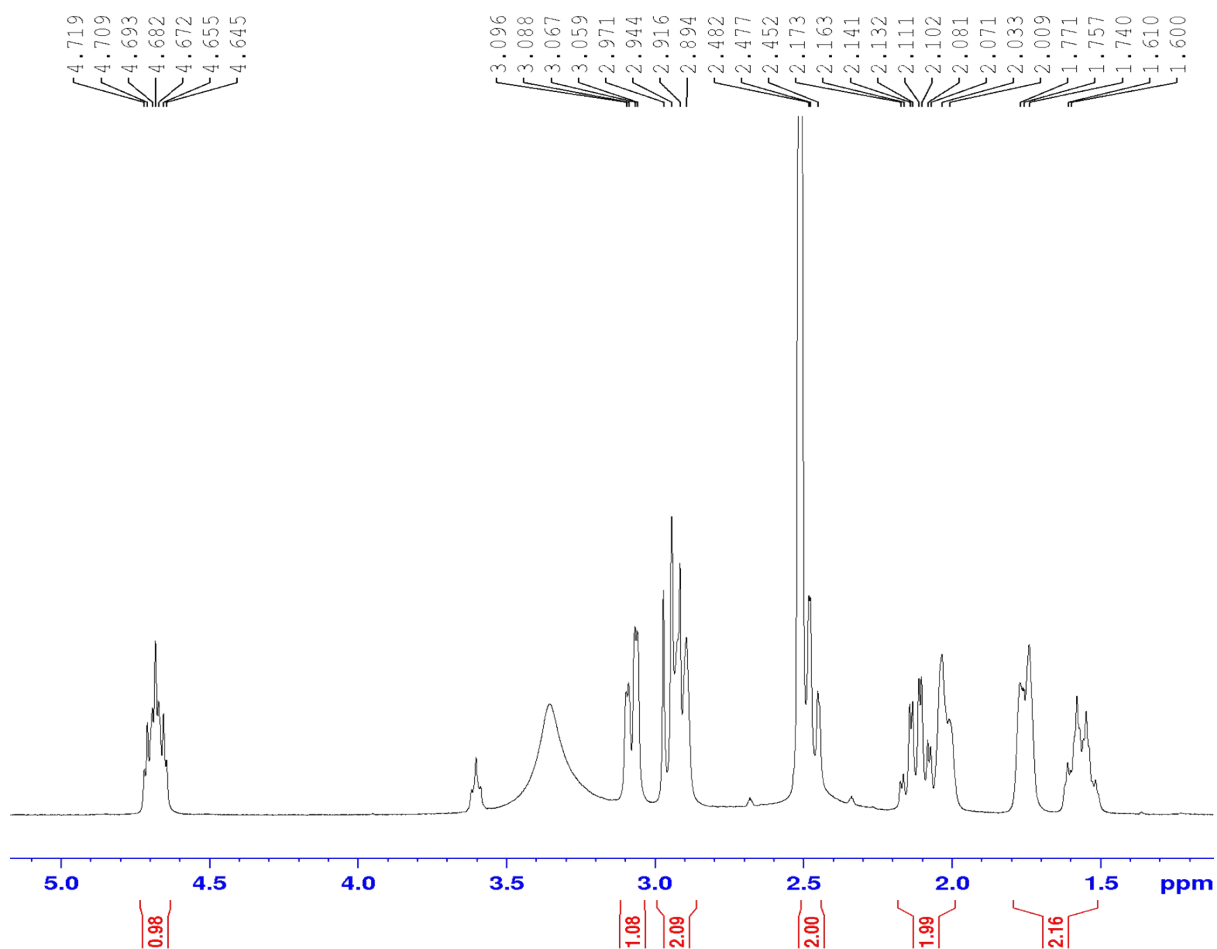

Figure 136. Aliphatic region of the  $^1\text{H}$  NMR spectrum for **8**

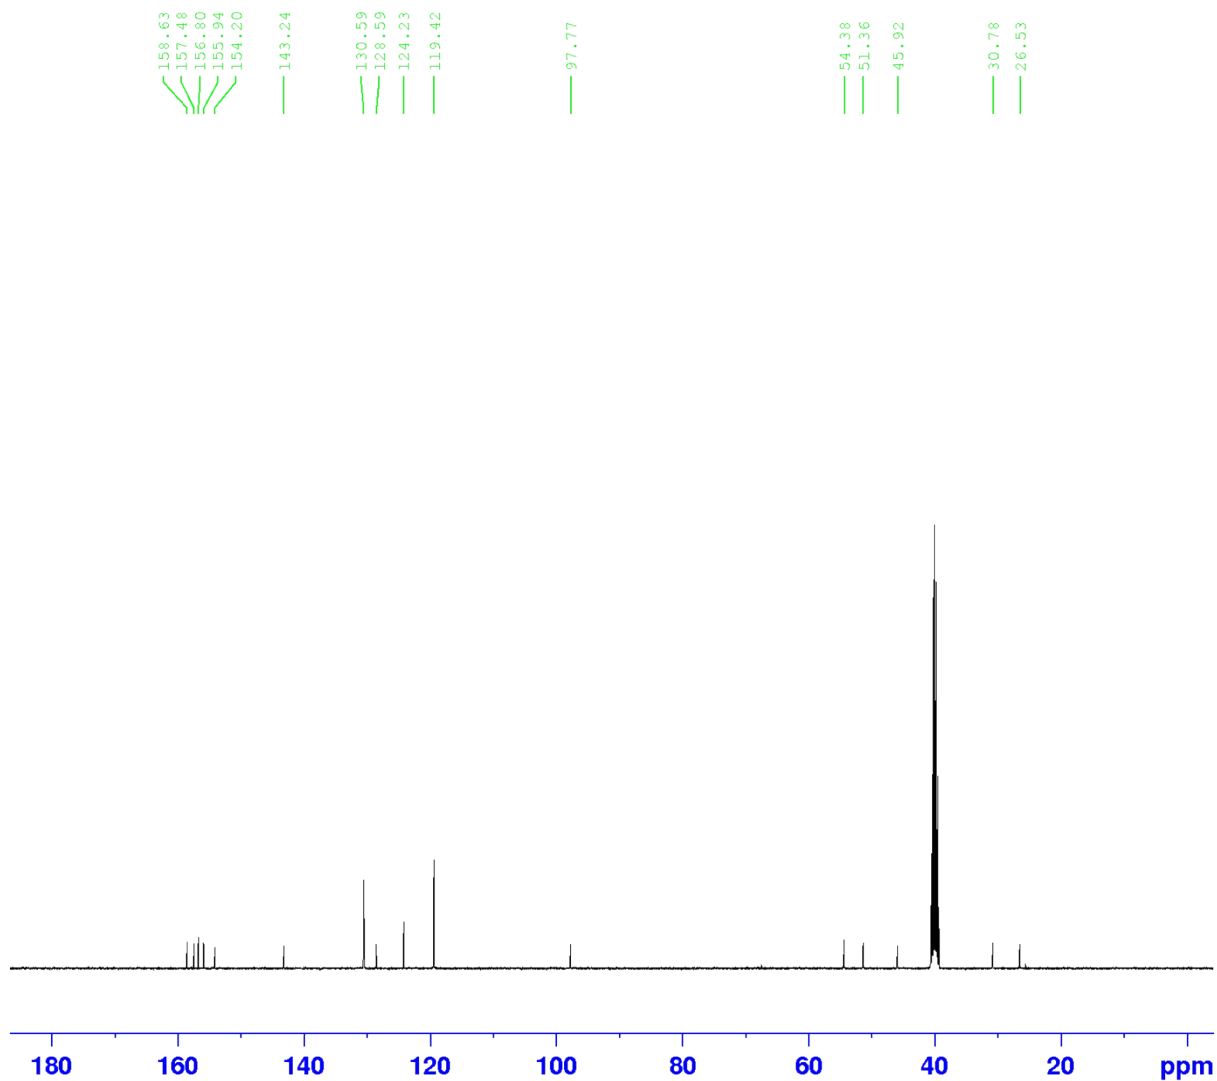

Figure 137.  $^{13}\text{C}$ -NMR spectrum of **8**

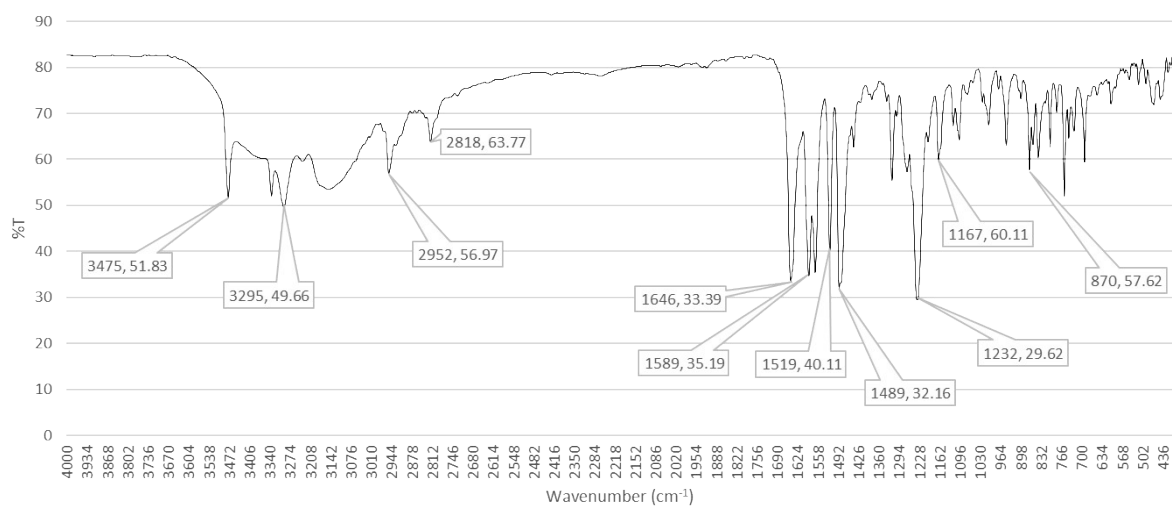

Figure 138. FT-IR spectrum of **8**

***In-vitro* anti-cancer activity against NCI 60 cell line panel – five dose study and NCI COMPARE. (Compound 12c)**

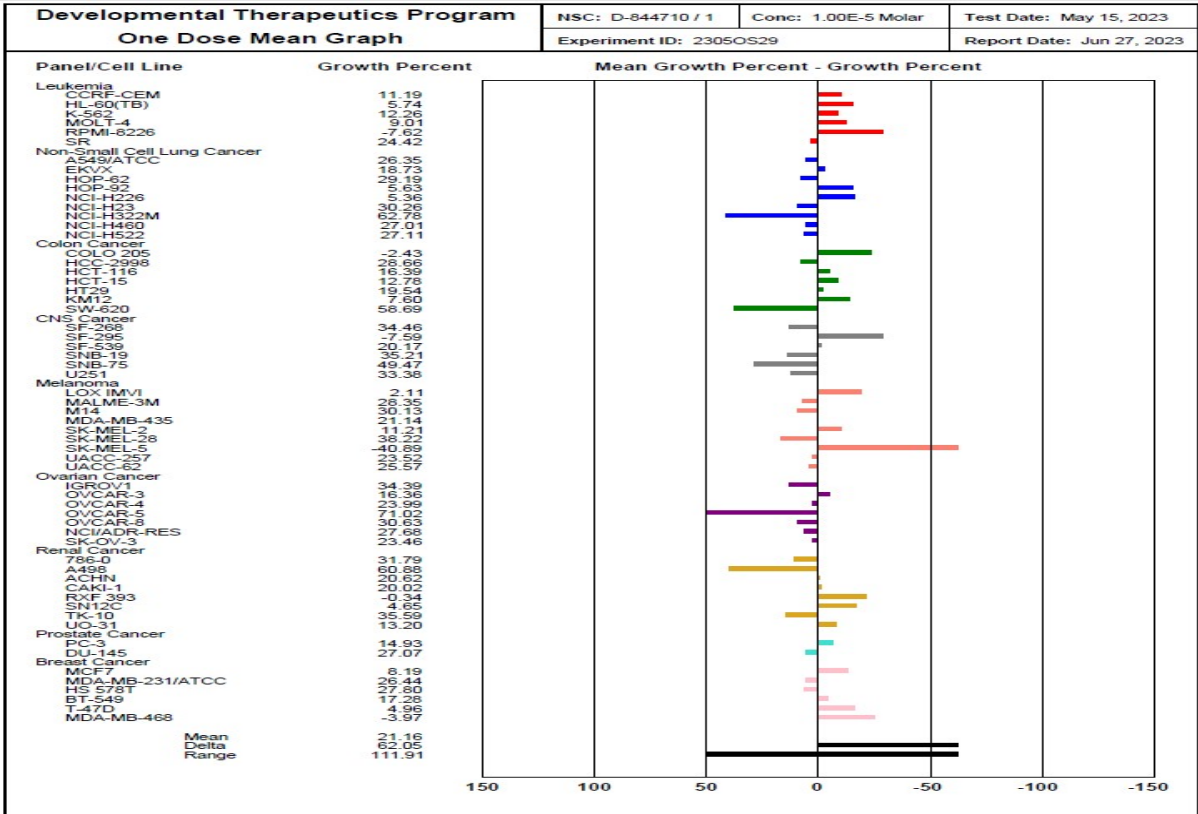

Figure 139. NCI report for growth inhibitory activity of sample 12c at 10 $\mu$ M concentration

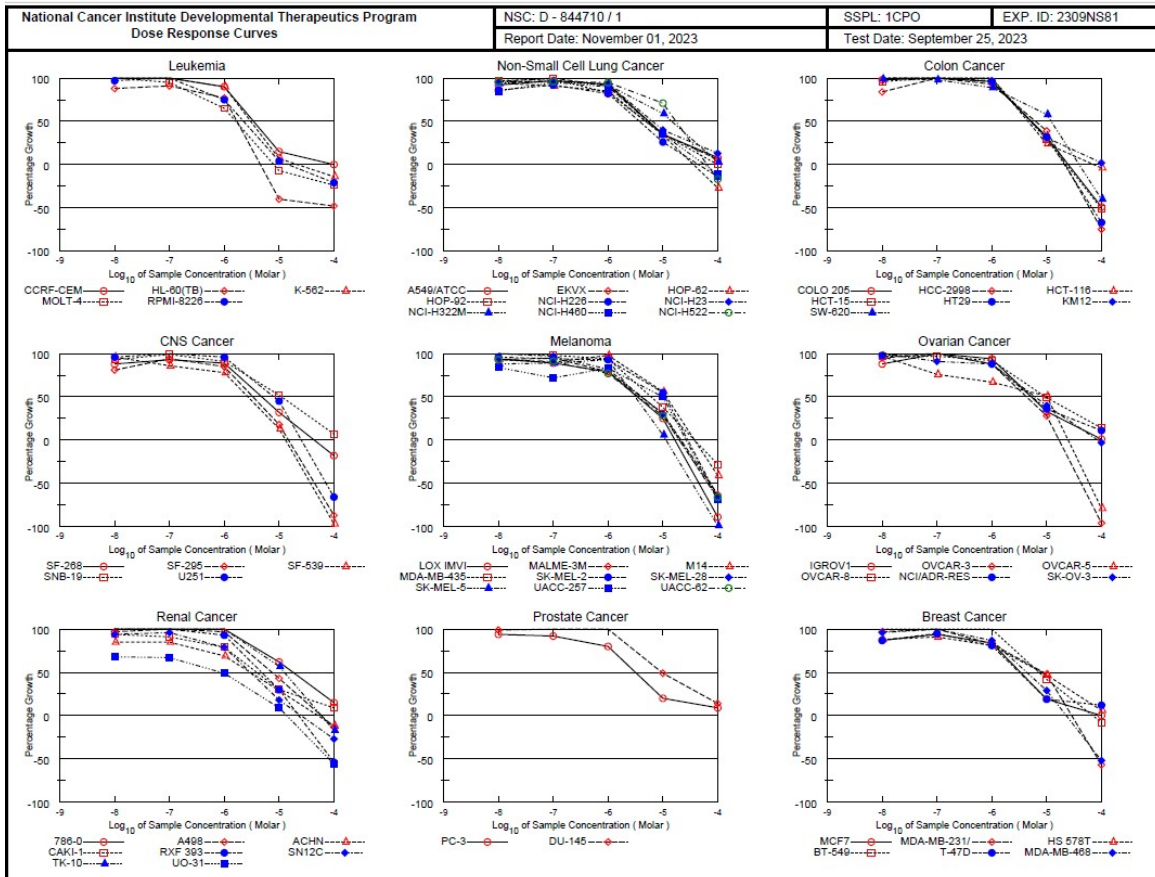

Figure 140. Dose response curves for compound 12c in individual cell lines

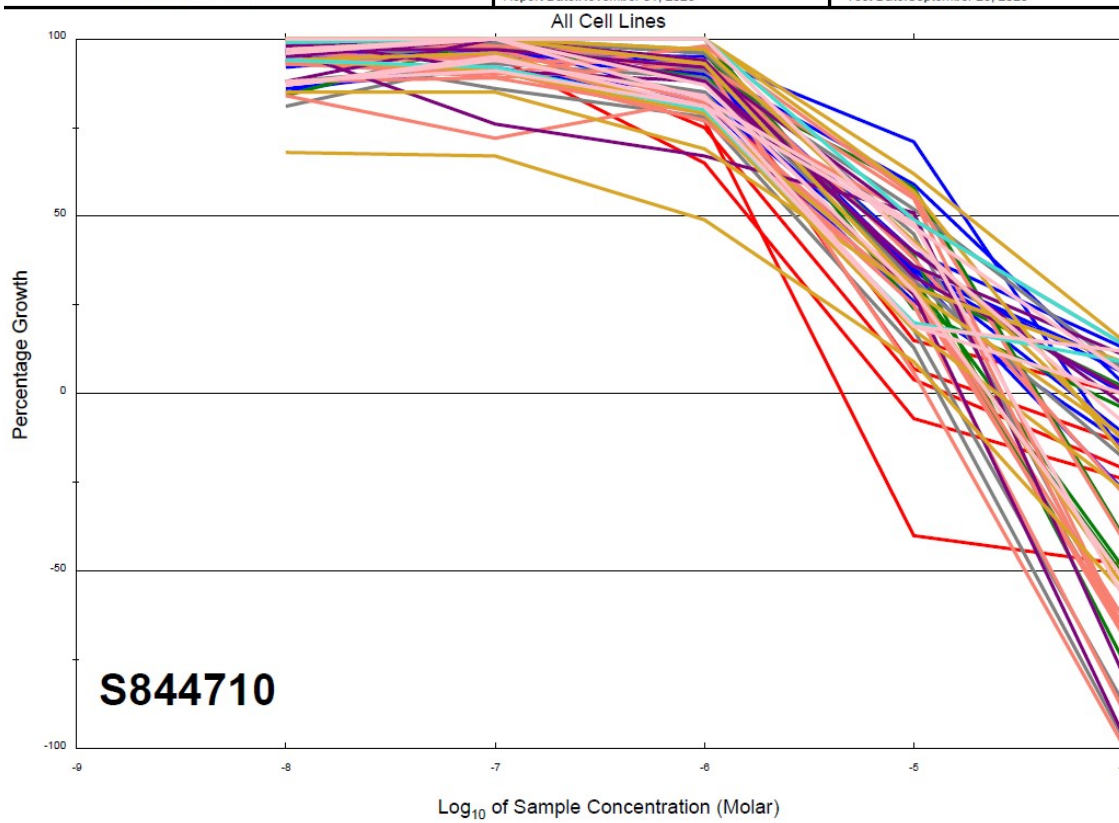

Figure 141. Dose response curves for compound **12c** in all cell lines



**National Cancer Institute Developmental Therapeutics Program  
In-Vitro Testing Results**

| NSC : D - 844710 / 1              |           | Experiment ID : 2309NS81              |                        |       |       |       |       | Test Type : 08 |                |      |      | Units : Molar |         |           |           |  |
|-----------------------------------|-----------|---------------------------------------|------------------------|-------|-------|-------|-------|----------------|----------------|------|------|---------------|---------|-----------|-----------|--|
| Report Date : November 01, 2023   |           | Test Date : September 25, 2023        |                        |       |       |       |       | QNS :          |                |      |      | MC :          |         |           |           |  |
| COMI : 037                        |           | Stain Reagent : SRB Dual-Pass Related |                        |       |       |       |       | SSPL : 1CPO    |                |      |      |               |         |           |           |  |
| Panel/Cell Line                   | Time Zero | Ctrl                                  | Log10 Concentration    |       |       |       |       |                | Percent Growth |      |      |               | GI50    | TGI       | LC50      |  |
|                                   |           |                                       | Mean Optical Densities |       |       |       |       |                |                |      |      |               |         |           |           |  |
|                                   |           |                                       | -8.0                   | -7.0  | -6.0  | -5.0  | -4.0  | -8.0           | -7.0           | -6.0 | -5.0 | -4.0          |         |           |           |  |
| <b>Leukemia</b>                   |           |                                       |                        |       |       |       |       |                |                |      |      |               |         |           |           |  |
| CCRF-CEM                          | 0.494     | 2.709                                 | 2.709                  | 2.702 | 2.495 | 0.828 | 0.505 | 100            | 100            | 90   | 15   | 0             | 3.44E-6 | > 1.00E-4 | > 1.00E-4 |  |
| HL-60(TB)                         | 0.589     | 2.620                                 | 2.377                  | 2.436 | 2.152 | 0.352 | 0.307 | 88             | 91             | 77   | -40  | -48           | 1.70E-6 | 4.53E-6   | > 1.00E-4 |  |
| K-562                             | 0.236     | 2.277                                 | 2.372                  | 2.332 | 2.084 | 0.384 | 0.203 | 105            | 103            | 90   | 7    | -14           | 3.02E-6 | 2.20E-6   | > 1.00E-4 |  |
| MOLT-4                            | 0.508     | 2.611                                 | 2.643                  | 2.509 | 1.869 | 0.471 | 0.387 | 102            | 95             | 65   | -7   | -24           | 1.60E-6 | 7.92E-6   | > 1.00E-4 |  |
| RPMI-8226                         | 0.797     | 2.610                                 | 2.553                  | 2.612 | 2.162 | 0.866 | 0.634 | 97             | 100            | 75   | 4    | -21           | 2.26E-6 | 1.43E-6   | > 1.00E-4 |  |
| <b>Non-Small Cell Lung Cancer</b> |           |                                       |                        |       |       |       |       |                |                |      |      |               |         |           |           |  |
| A549/ATCC                         | 0.421     | 2.352                                 | 2.189                  | 2.302 | 2.211 | 1.089 | 0.582 | 92             | 97             | 93   | 35   | 8             | 5.43E-6 | > 1.00E-4 | > 1.00E-4 |  |
| EKVX                              | 0.945     | 2.328                                 | 2.266                  | 2.330 | 2.204 | 1.429 | 1.033 | 95             | 100            | 91   | 35   | 6             | 5.39E-6 | > 1.00E-4 | > 1.00E-4 |  |
| HOP-62                            | 0.538     | 1.908                                 | 1.824                  | 1.789 | 1.705 | 1.007 | 0.394 | 94             | 91             | 85   | 34   | -27           | 4.90E-6 | 3.63E-6   | > 1.00E-4 |  |
| HOP-92                            | 0.834     | 1.612                                 | 1.592                  | 1.606 | 1.483 | 1.105 | 0.833 | 97             | 99             | 83   | 35   | 0             | 4.86E-6 | 9.88E-6   | > 1.00E-4 |  |
| NCI-H226                          | 1.201     | 2.411                                 | 2.245                  | 2.313 | 2.191 | 1.521 | 1.032 | 86             | 92             | 82   | 26   | -14           | 3.75E-6 | 4.48E-6   | > 1.00E-4 |  |
| NCI-H23                           | 0.595     | 2.080                                 | 2.012                  | 2.040 | 1.973 | 1.187 | 0.788 | 95             | 97             | 93   | 40   | 13            | 6.44E-6 | > 1.00E-4 | > 1.00E-4 |  |
| NCI-H322M                         | 0.916     | 2.506                                 | 2.410                  | 2.436 | 2.376 | 1.847 | 0.962 | 94             | 96             | 92   | 59   | 3             | 1.42E-6 | > 1.00E-4 | > 1.00E-4 |  |
| NCI-H460                          | 0.288     | 2.644                                 | 2.288                  | 2.530 | 2.397 | 1.124 | 0.257 | 85             | 95             | 90   | 35   | -11           | 5.38E-6 | 5.85E-6   | > 1.00E-4 |  |
| NCI-H522                          | 2.068     | 3.388                                 | 3.331                  | 3.336 | 3.322 | 3.003 | 1.722 | 96             | 96             | 95   | 71   | -17           | 1.73E-5 | 6.44E-5   | > 1.00E-4 |  |
| <b>Colon Cancer</b>               |           |                                       |                        |       |       |       |       |                |                |      |      |               |         |           |           |  |
| COLO 205                          | 0.645     | 2.754                                 | 2.705                  | 2.777 | 2.664 | 1.316 | 0.328 | 98             | 101            | 96   | 32   | -49           | 5.19E-6 | 2.47E-5   | > 1.00E-4 |  |
| HCC-2998                          | 0.669     | 2.643                                 | 2.320                  | 2.638 | 2.509 | 1.431 | 0.170 | 84             | 100            | 93   | 39   | -75           | 6.18E-6 | 2.19E-6   | 6.06E-5   |  |
| HCT-116                           | 0.251     | 2.422                                 | 2.464                  | 2.633 | 2.511 | 0.782 | 0.240 | 102            | 110            | 104  | 24   | -4            | 4.78E-6 | 7.05E-6   | > 1.00E-4 |  |
| HCT-15                            | 0.409     | 2.779                                 | 2.694                  | 2.793 | 2.789 | 1.087 | 0.202 | 95             | 101            | 100  | 29   | -51           | 4.99E-6 | 2.29E-6   | 9.79E-5   |  |
| HT29                              | 0.402     | 2.541                                 | 2.682                  | 2.545 | 2.463 | 1.089 | 0.131 | 107            | 100            | 96   | 32   | -67           | 5.27E-6 | 2.10E-6   | 6.68E-5   |  |
| KM12                              | 0.767     | 3.254                                 | 3.263                  | 3.273 | 3.180 | 1.548 | 0.827 | 100            | 101            | 97   | 31   | 2             | 5.20E-6 | > 1.00E-4 | > 1.00E-4 |  |
| SW-620                            | 0.336     | 2.042                                 | 2.024                  | 2.011 | 1.850 | 1.329 | 0.202 | 99             | 98             | 89   | 58   | -40           | 1.21E-5 | 3.92E-5   | > 1.00E-4 |  |
| <b>CNS Cancer</b>                 |           |                                       |                        |       |       |       |       |                |                |      |      |               |         |           |           |  |
| SF-268                            | 0.793     | 2.277                                 | 2.092                  | 2.167 | 2.118 | 1.265 | 0.649 | 88             | 93             | 89   | 32   | -18           | 4.82E-6 | 4.32E-5   | > 1.00E-4 |  |
| SF-295                            | 0.734     | 2.481                                 | 2.152                  | 2.374 | 2.226 | 1.057 | 0.094 | 81             | 94             | 85   | 18   | -87           | 3.38E-6 | 1.50E-5   | 4.44E-5   |  |
| SF-539                            | 0.969     | 2.670                                 | 2.600                  | 2.438 | 2.300 | 1.184 | 0.025 | 96             | 98             | 78   | 13   | -97           | 2.69E-6 | 1.30E-5   | 3.71E-5   |  |
| SNB-19                            | 0.609     | 2.164                                 | 2.061                  | 2.143 | 2.020 | 1.417 | 0.724 | 93             | 99             | 91   | 52   | 7             | 1.11E-5 | > 1.00E-4 | > 1.00E-4 |  |
| U251                              | 0.390     | 1.765                                 | 1.708                  | 1.763 | 1.706 | 1.005 | 0.132 | 96             | 100            | 96   | 45   | -66           | 7.88E-6 | 2.53E-5   | 7.15E-5   |  |
| <b>Melanoma</b>                   |           |                                       |                        |       |       |       |       |                |                |      |      |               |         |           |           |  |
| LOX IMVI                          | 0.390     | 2.408                                 | 2.291                  | 2.180 | 1.988 | 0.898 | 0.041 | 94             | 89             | 79   | 25   | -89           | 3.46E-6 | 1.66E-5   | 4.52E-5   |  |
| MALME-3M                          | 0.698     | 1.425                                 | 1.376                  | 1.391 | 1.272 | 0.921 | 0.255 | 93             | 95             | 79   | 31   | -63           | 3.97E-6 | 2.12E-5   | 7.19E-5   |  |
| M14                               | 0.488     | 1.935                                 | 1.830                  | 1.797 | 1.901 | 1.292 | 0.289 | 93             | 90             | 98   | 56   | -41           | 1.14E-5 | 3.77E-6   | > 1.00E-4 |  |
| MDA-MB-435                        | 0.589     | 2.346                                 | 2.359                  | 2.319 | 2.235 | 1.262 | 0.422 | 101            | 98             | 94   | 38   | -28           | 6.15E-6 | 3.76E-6   | > 1.00E-4 |  |
| SK-MEL-2                          | 1.482     | 2.874                                 | 2.817                  | 2.785 | 2.782 | 2.246 | 0.498 | 90             | 94             | 93   | 55   | -86           | 1.10E-5 | 2.83E-6   | 7.32E-5   |  |
| SK-MEL-28                         | 0.408     | 1.441                                 | 1.477                  | 1.405 | 1.257 | 0.716 | 0.130 | 104            | 97             | 82   | 30   | -88           | 4.12E-6 | 2.02E-6   | 6.53E-5   |  |
| SK-MEL-5                          | 1.218     | 3.323                                 | 3.076                  | 3.098 | 3.176 | 1.340 | 0.015 | 89             | 89             | 93   | 6    | -99           | 3.11E-6 | 1.14E-5   | 3.41E-5   |  |
| UACC-257                          | 1.356     | 2.780                                 | 2.547                  | 2.381 | 2.544 | 2.071 | 0.431 | 84             | 72             | 83   | 50   | -88           | 1.00E-5 | 2.65E-6   | 7.02E-5   |  |
| UACC-62                           | 0.888     | 2.966                                 | 2.820                  | 2.773 | 2.491 | 1.479 | 0.302 | 93             | 91             | 77   | 28   | -66           | 3.61E-6 | 2.00E-5   | 6.78E-5   |  |
| <b>Ovarian Cancer</b>             |           |                                       |                        |       |       |       |       |                |                |      |      |               |         |           |           |  |
| IGROV1                            | 0.905     | 2.519                                 | 2.313                  | 2.523 | 2.424 | 1.367 | 0.824 | 88             | 100            | 94   | 33   | 1             | 5.26E-6 | > 1.00E-4 | > 1.00E-4 |  |
| OVCA3                             | 0.583     | 1.890                                 | 1.831                  | 1.894 | 1.738 | 0.953 | 0.023 | 95             | 100            | 88   | 28   | -96           | 4.35E-6 | 1.69E-5   | 4.28E-5   |  |
| OVCA5                             | 0.675     | 1.571                                 | 1.544                  | 1.356 | 1.280 | 1.133 | 0.143 | 97             | 78             | 87   | 51   | -79           | 1.02E-5 | 2.47E-5   | 6.00E-5   |  |
| OVCA8                             | 0.556     | 2.563                                 | 2.499                  | 2.508 | 2.405 | 1.539 | 0.840 | 97             | 97             | 92   | 49   | 14            | 9.47E-6 | > 1.00E-4 | > 1.00E-4 |  |
| NCI/ADR-RES                       | 0.477     | 1.708                                 | 1.680                  | 1.708 | 1.554 | 0.920 | 0.809 | 98             | 100            | 88   | 36   | 11            | 5.36E-6 | > 1.00E-4 | > 1.00E-4 |  |
| SK-OV-3                           | 0.834     | 1.938                                 | 1.954                  | 1.842 | 1.809 | 1.278 | 0.807 | 101            | 91             | 88   | 40   | -3            | 6.26E-6 | 8.40E-5   | > 1.00E-4 |  |
| <b>Renal Cancer</b>               |           |                                       |                        |       |       |       |       |                |                |      |      |               |         |           |           |  |
| 786-0                             | 0.639     | 2.852                                 | 2.904                  | 2.973 | 2.856 | 2.019 | 0.976 | 102            | 105            | 100  | 62   | 15            | 1.83E-5 | > 1.00E-4 | > 1.00E-4 |  |
| A498                              | 1.292     | 2.242                                 | 2.218                  | 2.296 | 2.210 | 1.702 | 1.127 | 97             | 106            | 97   | 43   | -13           | 7.45E-6 | 5.90E-5   | > 1.00E-4 |  |
| ACHN                              | 0.288     | 1.374                                 | 1.214                  | 1.208 | 1.035 | 0.802 | 0.253 | 85             | 85             | 69   | 29   | -12           | 2.95E-6 | 5.02E-5   | > 1.00E-4 |  |
| CAKI-1                            | 0.803     | 2.459                                 | 2.349                  | 2.301 | 2.072 | 1.157 | 0.775 | 94             | 91             | 79   | 30   | 9             | 3.90E-6 | > 1.00E-4 | > 1.00E-4 |  |
| RXF 393                           | 0.815     | 1.577                                 | 1.596                  | 1.640 | 1.526 | 1.044 | 0.379 | 103            | 108            | 93   | 30   | -54           | 4.84E-6 | 2.29E-5   | 9.07E-5   |  |
| SN12C                             | 0.457     | 2.074                                 | 1.977                  | 2.003 | 1.733 | 0.752 | 0.336 | 94             | 96             | 79   | 18   | -27           | 3.00E-6 | 2.55E-5   | > 1.00E-4 |  |
| TK-10                             | 1.329     | 2.169                                 | 2.173                  | 2.308 | 2.571 | 1.810 | 1.104 | 101            | 117            | 148  | 57   | -17           | 1.25E-5 | 5.91E-5   | > 1.00E-4 |  |
| UO-31                             | 0.668     | 2.149                                 | 1.882                  | 1.858 | 1.392 | 0.796 | 0.297 | 68             | 67             | 49   | 9    | -56           | 8.64E-7 | 1.36E-5   | 8.20E-5   |  |
| <b>Prostate Cancer</b>            |           |                                       |                        |       |       |       |       |                |                |      |      |               |         |           |           |  |
| PC-3                              | 0.559     | 2.258                                 | 2.157                  | 2.130 | 1.918 | 0.901 | 0.706 | 94             | 92             | 80   | 20   | 9             | 3.17E-6 | > 1.00E-4 | > 1.00E-4 |  |
| DU-145                            | 0.359     | 1.639                                 | 1.630                  | 1.656 | 1.702 | 0.980 | 0.541 | 99             | 101            | 105  | 49   | 14            | 9.41E-6 | > 1.00E-4 | > 1.00E-4 |  |
| <b>Breast Cancer</b>              |           |                                       |                        |       |       |       |       |                |                |      |      |               |         |           |           |  |
| MCF7                              | 0.625     | 2.614                                 | 2.352                  | 2.491 | 2.303 | 1.000 | 0.630 | 87             | 94             | 84   | 19   | 0             | 3.34E-6 | > 1.00E-4 | > 1.00E-4 |  |
| MDA-MB-231/ATCC                   | 0.495     | 1.176                                 | 1.156                  | 1.175 | 1.061 | 0.824 | 0.211 | 97             | 100            | 83   | 48   | -57           | 8.89E-6 | 2.86E-5   | 8.51E-5   |  |
| HS 578T                           | 0.888     | 2.112                                 | 1.965                  | 1.995 | 1.876 | 1.447 | 0.947 | 88             | 91             | 81   | 47   | 6             | 7.93E-6 | > 1.00E-4 | > 1.00E-4 |  |
| BT-549                            | 1.079     | 2.435                                 | 2.465                  | 2.581 | 2.459 | 1.647 | 0.990 | 102            | 111            | 102  | 42   | -8            | 7.31E-6 | 6.84E-5   | > 1.00E-4 |  |
| T-47D                             | 0.750     | 1.964                                 | 1.803                  | 1.905 | 1.737 | 0.977 | 0.894 | 87             | 95             | 81   | 19   | 12            | 3.16E-6 | > 1.00E-4 | > 1.00E-4 |  |
| MDA-MB-468                        | 0.959     | 2.002                                 | 1.965                  | 2.028 | 1.863 | 1.262 | 0.461 | 96             | 103            | 87   | 29   | -52           | 4.33E-6 | 2.28E-5   | 9.47E-5   |  |

Figure 142. In-vitro five dose testing results for compound 12c

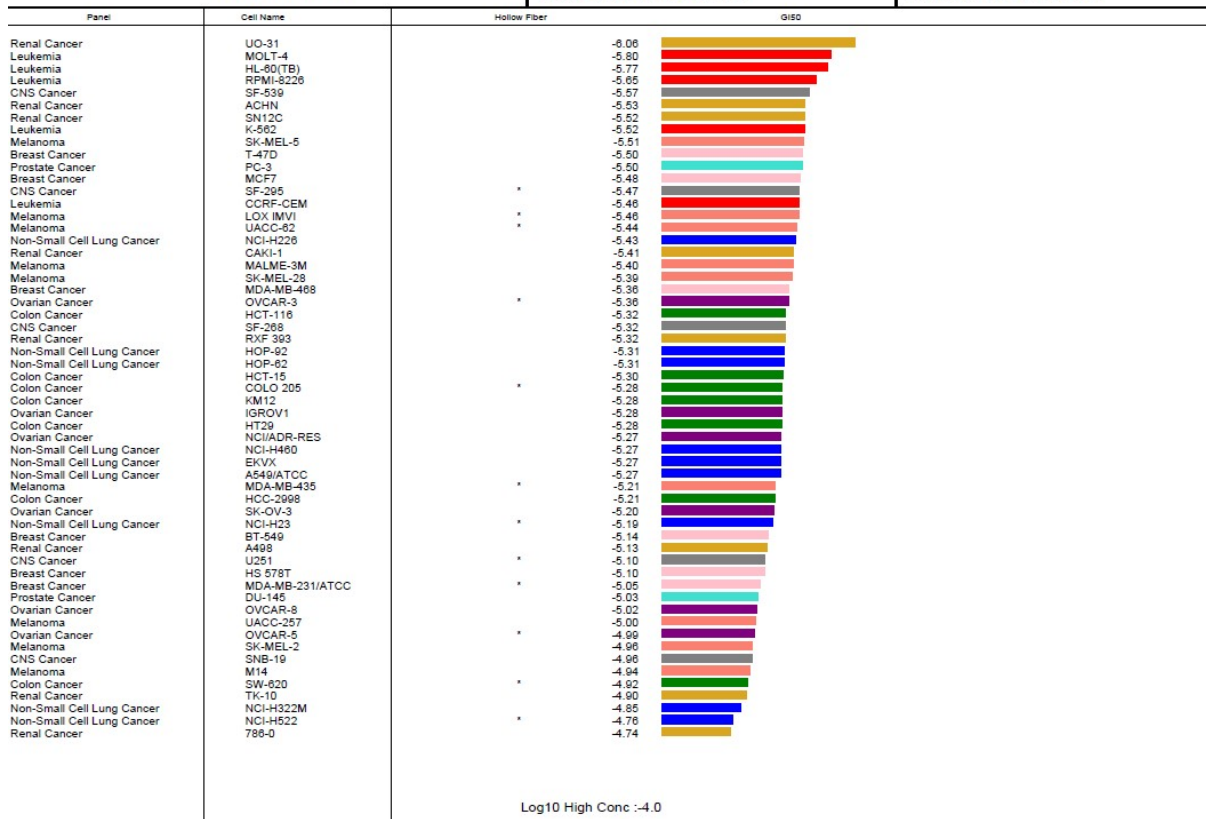

Figure 143. IC<sub>50</sub> values depicted in the waterfall graph for compound 12c

***In-vitro* anti-cancer activity against NCI 60 cell line panel – five dose study and NCI COMPARE. (Compound 12d)**

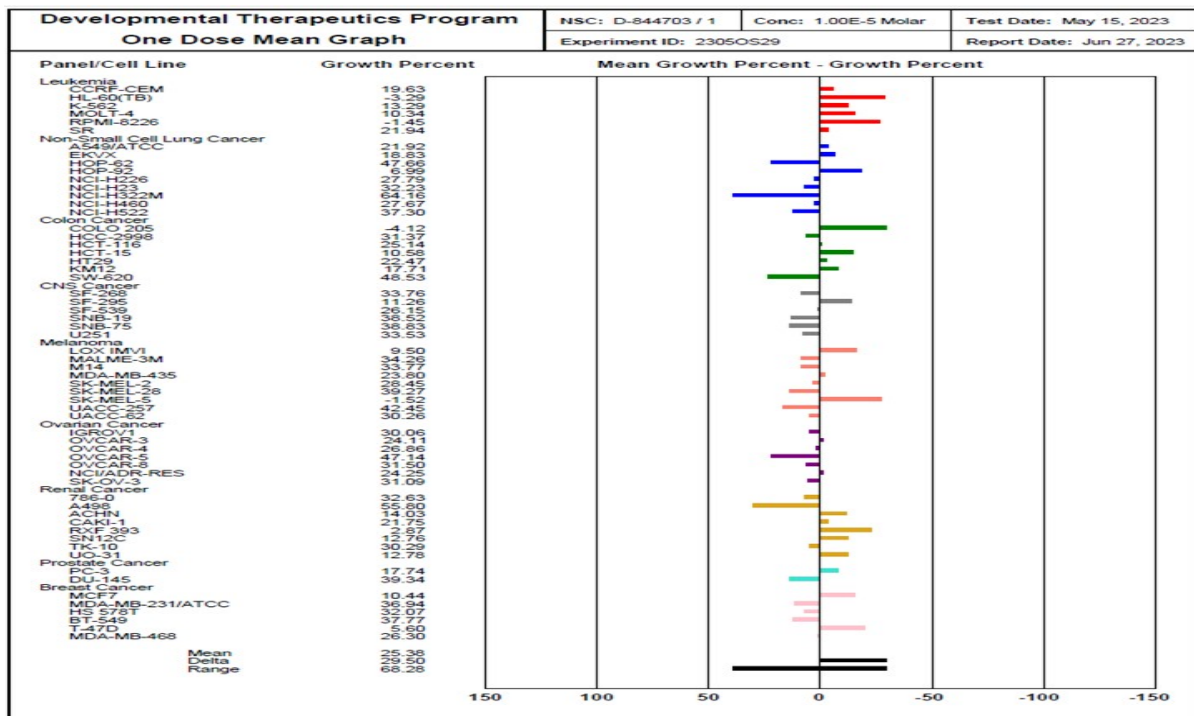

Figure 144. NCI report for growth inhibitory activity of sample 12d at 10µM concentration

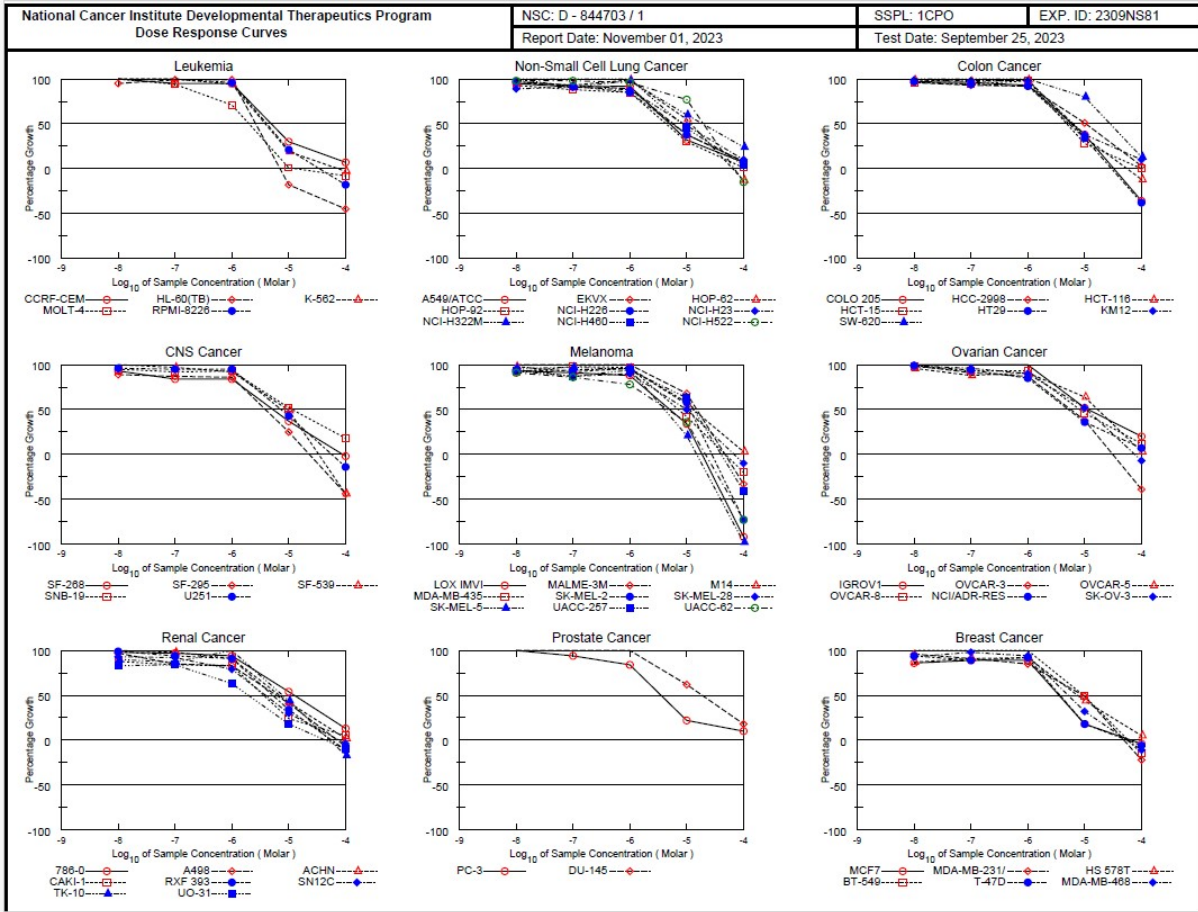

Figure 145. Dose response curves for compound **12d** in individual cell lines

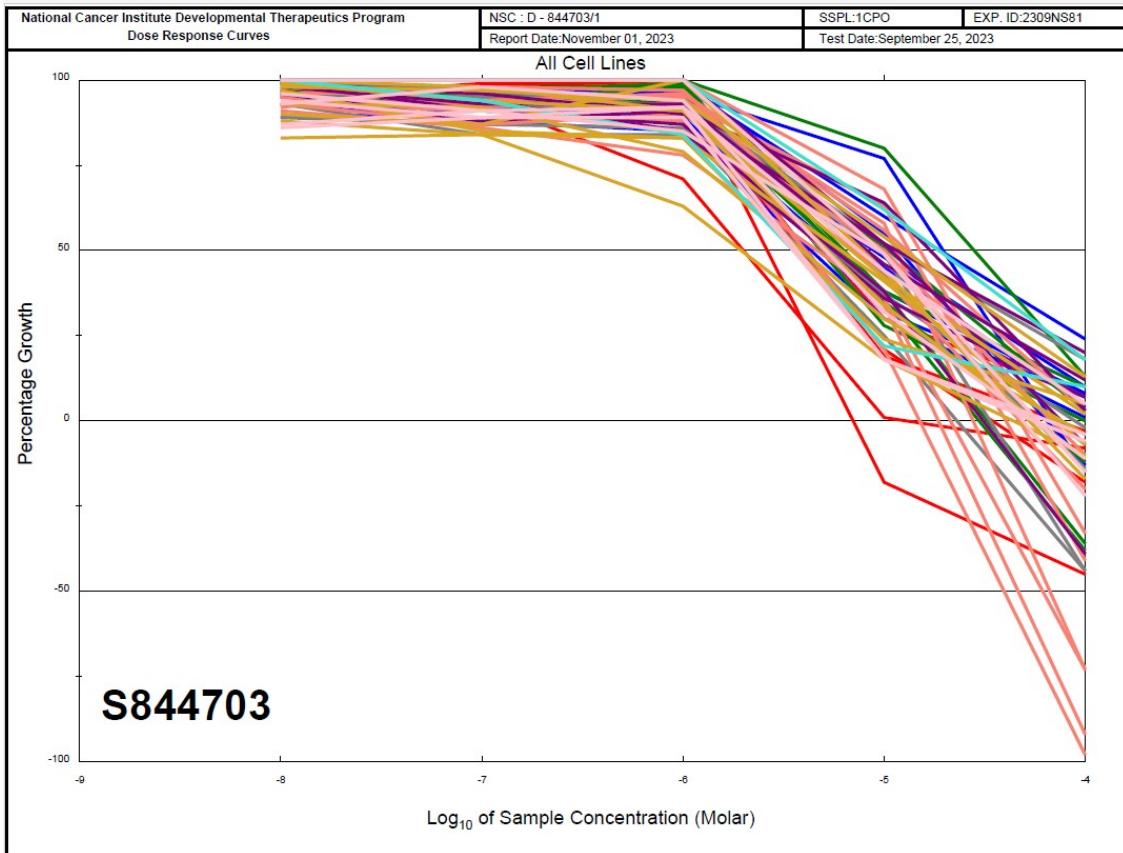

Figure 146. Dose response curves for compound **12d** in all cell lines

**National Cancer Institute Developmental Therapeutics Program  
In-Vitro Testing Results**

| NSC : D - 844703 / 1              |           | Experiment ID : 2309NS81              |                        |       |       |       | Test Type : 08 |                | Units : Molar |      |      |      |         |           |           |
|-----------------------------------|-----------|---------------------------------------|------------------------|-------|-------|-------|----------------|----------------|---------------|------|------|------|---------|-----------|-----------|
| Report Date : November 01, 2023   |           | Test Date : September 25, 2023        |                        |       |       |       | QNS :          |                | MC :          |      |      |      |         |           |           |
| COMI : 038                        |           | Stain Reagent : SRB Dual-Pass Related |                        |       |       |       | SSPL : 1CPO    |                |               |      |      |      |         |           |           |
| Panel/Cell Line                   | Time Zero | Ctrl                                  | Log10 Concentration    |       |       |       |                | Percent Growth |               |      |      |      | GI50    | TGI       | LC50      |
|                                   |           |                                       | Mean Optical Densities |       |       |       |                |                |               |      |      |      |         |           |           |
|                                   |           |                                       | -8.0                   | -7.0  | -6.0  | -5.0  | -4.0           | -8.0           | -7.0          | -6.0 | -5.0 | -4.0 |         |           |           |
| <b>Leukemia</b>                   |           |                                       |                        |       |       |       |                |                |               |      |      |      |         |           |           |
| CCRF-CEM                          | 0.494     | 2.711                                 | 2.715                  | 2.603 | 2.601 | 1.153 | 0.680          | 100            | 95            | 95   | 30   | 7    | 4.89E-6 | > 1.00E-4 | > 1.00E-4 |
| HL-60(TB)                         | 0.589     | 2.595                                 | 2.496                  | 2.585 | 2.578 | 0.485 | 0.325          | 95             | 99            | 99   | -18  | -45  | 2.63E-6 | 7.05E-6   | > 1.00E-4 |
| K-562                             | 0.236     | 2.385                                 | 2.411                  | 2.443 | 2.248 | 0.638 | 0.230          | 101            | 103           | 94   | 19   | -3   | 3.82E-6 | 7.59E-6   | > 1.00E-4 |
| MOLT-4                            | 0.508     | 2.453                                 | 2.444                  | 2.344 | 1.886 | 0.535 | 0.466          | 100            | 94            | 71   | 1    | -8   | 2.00E-6 | 1.39E-6   | > 1.00E-4 |
| RPMI-8226                         | 0.797     | 2.574                                 | 2.648                  | 2.733 | 2.510 | 1.162 | 0.657          | 104            | 109           | 96   | 21   | -18  | 4.08E-6 | 3.45E-6   | > 1.00E-4 |
| <b>Non-Small Cell Lung Cancer</b> |           |                                       |                        |       |       |       |                |                |               |      |      |      |         |           |           |
| A549/ATCC                         | 0.421     | 2.275                                 | 2.187                  | 2.107 | 2.126 | 1.017 | 0.548          | 95             | 91            | 92   | 32   | 7    | 5.03E-6 | > 1.00E-4 | > 1.00E-4 |
| EKVX                              | 0.945     | 2.313                                 | 2.279                  | 2.215 | 2.167 | 1.466 | 1.057          | 97             | 93            | 89   | 38   | 8    | 5.85E-6 | > 1.00E-4 | > 1.00E-4 |
| HOP-92                            | 0.538     | 1.897                                 | 1.831                  | 1.808 | 1.885 | 1.286 | 0.468          | 95             | 93            | 99   | 55   | -13  | 1.19E-6 | 6.42E-6   | > 1.00E-4 |
| HOP-92                            | 0.834     | 1.663                                 | 1.603                  | 1.561 | 1.541 | 1.084 | 0.845          | 93             | 88            | 85   | 30   | 1    | 4.36E-6 | > 1.00E-4 | > 1.00E-4 |
| NCI-H226                          | 1.201     | 2.405                                 | 2.365                  | 2.304 | 2.228 | 1.656 | 1.303          | 97             | 92            | 85   | 38   | 8    | 5.53E-6 | > 1.00E-4 | > 1.00E-4 |
| NCI-H23                           | 0.595     | 2.105                                 | 1.943                  | 1.972 | 1.931 | 1.322 | 0.749          | 89             | 91            | 88   | 48   | 10   | 8.98E-6 | > 1.00E-4 | > 1.00E-4 |
| NCI-H322M                         | 0.916     | 2.504                                 | 2.575                  | 2.368 | 2.466 | 1.865 | 1.291          | 104            | 91            | 98   | 60   | 24   | 1.86E-6 | > 1.00E-4 | > 1.00E-4 |
| NCI-H460                          | 0.288     | 2.502                                 | 2.509                  | 2.803 | 2.603 | 1.293 | 0.370          | 100            | 114           | 105  | 45   | 4    | 8.36E-6 | > 1.00E-4 | > 1.00E-4 |
| NCI-H522                          | 2.068     | 3.366                                 | 3.341                  | 3.334 | 3.317 | 3.073 | 1.759          | 98             | 98            | 96   | 77   | -15  | 1.98E-6 | 6.89E-6   | > 1.00E-4 |
| <b>Colon Cancer</b>               |           |                                       |                        |       |       |       |                |                |               |      |      |      |         |           |           |
| COLO 205                          | 0.645     | 2.793                                 | 2.739                  | 2.708 | 2.647 | 1.458 | 0.416          | 97             | 96            | 93   | 38   | -36  | 6.03E-6 | 3.28E-6   | > 1.00E-4 |
| HCC-2998                          | 0.669     | 2.596                                 | 2.521                  | 2.455 | 2.450 | 1.647 | 0.732          | 96             | 93            | 92   | 51   | 3    | 1.04E-6 | > 1.00E-4 | > 1.00E-4 |
| HCT-116                           | 0.251     | 2.392                                 | 2.368                  | 2.332 | 2.380 | 1.004 | 0.222          | 99             | 97            | 99   | 35   | -12  | 5.88E-6 | 5.62E-6   | > 1.00E-4 |
| HCT-15                            | 0.409     | 2.729                                 | 2.640                  | 2.597 | 2.676 | 1.056 | 0.416          | 96             | 94            | 98   | 28   | 0    | 4.82E-6 | > 1.00E-4 | > 1.00E-4 |
| HT29                              | 0.402     | 2.496                                 | 2.434                  | 2.381 | 2.322 | 1.107 | 0.251          | 97             | 94            | 92   | 34   | -38  | 5.23E-6 | > 1.00E-4 | > 1.00E-4 |
| KM12                              | 0.767     | 3.292                                 | 3.268                  | 3.250 | 3.233 | 1.714 | 1.021          | 99             | 98            | 98   | 38   | 10   | 6.20E-6 | > 1.00E-4 | > 1.00E-4 |
| SW-620                            | 0.336     | 2.077                                 | 2.294                  | 2.092 | 2.184 | 1.724 | 0.567          | 112            | 101           | 106  | 80   | 13   | 2.77E-6 | > 1.00E-4 | > 1.00E-4 |
| <b>CNS Cancer</b>                 |           |                                       |                        |       |       |       |                |                |               |      |      |      |         |           |           |
| SF-268                            | 0.793     | 2.323                                 | 2.213                  | 2.071 | 2.082 | 1.355 | 0.776          | 93             | 84            | 84   | 37   | -2   | 5.25E-6 | 8.81E-6   | > 1.00E-4 |
| SF-295                            | 0.734     | 2.356                                 | 2.179                  | 2.150 | 2.135 | 1.138 | 0.413          | 89             | 87            | 86   | 25   | -44  | 3.90E-6 | 2.30E-6   | > 1.00E-4 |
| SF-539                            | 0.969     | 2.877                                 | 2.889                  | 2.812 | 2.716 | 1.912 | 0.640          | 101            | 97            | 92   | 49   | -44  | 9.67E-6 | 3.37E-6   | > 1.00E-4 |
| SNB-19                            | 0.809     | 2.083                                 | 2.016                  | 1.959 | 1.977 | 1.370 | 0.869          | 95             | 92            | 93   | 52   | 18   | 1.12E-6 | > 1.00E-4 | > 1.00E-4 |
| U251                              | 0.390     | 1.770                                 | 1.722                  | 1.703 | 1.695 | 0.981 | 0.334          | 96             | 95            | 95   | 43   | -14  | 7.27E-6 | 5.61E-6   | > 1.00E-4 |
| <b>Melanoma</b>                   |           |                                       |                        |       |       |       |                |                |               |      |      |      |         |           |           |
| LOX IMVI                          | 0.390     | 2.451                                 | 2.312                  | 2.275 | 2.211 | 1.083 | 0.032          | 93             | 91            | 88   | 34   | -92  | 5.02E-6 | 1.85E-6   | 4.64E-5   |
| MALME-3M                          | 0.698     | 1.406                                 | 1.526                  | 1.594 | 1.480 | 1.178 | 0.466          | 117            | 127           | 111  | 68   | -33  | 1.50E-6 | 4.68E-6   | > 1.00E-4 |
| M14                               | 0.488     | 1.921                                 | 1.892                  | 1.805 | 1.859 | 1.285 | 0.530          | 98             | 92            | 96   | 56   | 3    | 1.28E-6 | > 1.00E-4 | > 1.00E-4 |
| MDA-MB-435                        | 0.589     | 2.263                                 | 2.123                  | 2.225 | 2.216 | 1.298 | 0.489          | 92             | 98            | 97   | 42   | -20  | 7.25E-6 | 4.72E-6   | > 1.00E-4 |
| SK-MEL-2                          | 1.482     | 2.843                                 | 2.746                  | 2.763 | 2.786 | 2.272 | 0.400          | 93             | 94            | 96   | 58   | -73  | 1.15E-6 | 2.77E-6   | 6.67E-5   |
| SK-MEL-28                         | 0.408     | 1.596                                 | 1.532                  | 1.446 | 1.480 | 1.003 | 0.366          | 95             | 87            | 90   | 50   | -10  | 1.00E-6 | 6.75E-6   | > 1.00E-4 |
| SK-MEL-5                          | 1.218     | 3.352                                 | 3.275                  | 3.286 | 3.244 | 1.663 | 0.021          | 96             | 97            | 95   | 21   | -98  | 4.04E-6 | 1.50E-6   | 3.93E-5   |
| UACC-257                          | 1.356     | 2.814                                 | 2.715                  | 2.618 | 2.732 | 2.273 | 0.803          | 93             | 87            | 94   | 63   | -41  | 1.33E-6 | 4.04E-6   | > 1.00E-4 |
| UACC-62                           | 0.888     | 2.918                                 | 2.740                  | 2.637 | 2.473 | 1.609 | 0.241          | 91             | 86            | 78   | 36   | -73  | 4.57E-6 | 2.13E-6   | 6.15E-5   |
| <b>Ovarian Cancer</b>             |           |                                       |                        |       |       |       |                |                |               |      |      |      |         |           |           |
| IGROV1                            | 0.805     | 2.364                                 | 2.579                  | 2.625 | 2.545 | 1.613 | 1.110          | 114            | 117           | 112  | 52   | 20   | 1.14E-5 | > 1.00E-4 | > 1.00E-4 |
| OVCA9-3                           | 0.583     | 1.898                                 | 1.884                  | 1.777 | 1.731 | 1.087 | 0.358          | 99             | 91            | 87   | 39   | -39  | 5.77E-6 | 3.15E-6   | > 1.00E-4 |
| OVCA9-5                           | 0.675     | 1.768                                 | 1.723                  | 1.642 | 1.669 | 1.375 | 0.709          | 98             | 88            | 91   | 64   | 3    | 1.70E-6 | > 1.00E-4 | > 1.00E-4 |
| OVCA9-8                           | 0.556     | 2.546                                 | 2.510                  | 2.409 | 2.405 | 1.477 | 0.794          | 98             | 93            | 93   | 46   | 12   | 8.32E-6 | > 1.00E-4 | > 1.00E-4 |
| NCI/ADR-RES                       | 0.477     | 1.717                                 | 1.702                  | 1.642 | 1.531 | 0.919 | 0.559          | 99             | 94            | 85   | 36   | 7    | 5.11E-6 | > 1.00E-4 | > 1.00E-4 |
| SK-OV-3                           | 0.834     | 1.968                                 | 1.960                  | 1.928 | 1.858 | 1.419 | 0.774          | 99             | 96            | 90   | 52   | -7   | 1.06E-6 | 7.54E-6   | > 1.00E-4 |
| <b>Renal Cancer</b>               |           |                                       |                        |       |       |       |                |                |               |      |      |      |         |           |           |
| 786-0                             | 0.639     | 2.818                                 | 2.783                  | 2.752 | 2.697 | 1.810 | 0.932          | 98             | 97            | 94   | 54   | 13   | 1.24E-6 | > 1.00E-4 | > 1.00E-4 |
| A498                              | 1.292     | 2.272                                 | 2.245                  | 2.125 | 2.101 | 1.693 | 1.199          | 97             | 85            | 83   | 41   | -7   | 6.05E-6 | 7.07E-6   | > 1.00E-4 |
| ACHN                              | 0.288     | 1.602                                 | 1.512                  | 1.477 | 1.391 | 0.796 | 0.317          | 101            | 98            | 91   | 42   | 2    | 6.81E-6 | > 1.00E-4 | > 1.00E-4 |
| CAKI-1                            | 0.603     | 2.530                                 | 2.295                  | 2.219 | 2.203 | 1.069 | 0.698          | 88             | 84            | 83   | 24   | 5    | 3.64E-6 | > 1.00E-4 | > 1.00E-4 |
| RFX 393                           | 0.815     | 1.570                                 | 1.560                  | 1.523 | 1.501 | 1.070 | 0.725          | 99             | 94            | 91   | 34   | -11  | 5.20E-6 | 5.66E-6   | > 1.00E-4 |
| SN12C                             | 0.457     | 2.002                                 | 1.896                  | 1.871 | 1.680 | 0.915 | 0.441          | 93             | 92            | 79   | 30   | -4   | 3.88E-6 | 7.79E-6   | > 1.00E-4 |
| TK-10                             | 1.329     | 2.137                                 | 2.057                  | 2.028 | 2.240 | 1.685 | 1.107          | 90             | 87            | 113  | 44   | -17  | 8.20E-6 | 5.31E-6   | > 1.00E-4 |
| UO-31                             | 0.668     | 2.105                                 | 1.856                  | 1.873 | 1.573 | 0.934 | 0.599          | 83             | 84            | 63   | 18   | -10  | 1.96E-6 | 4.36E-6   | > 1.00E-4 |
| <b>Prostate Cancer</b>            |           |                                       |                        |       |       |       |                |                |               |      |      |      |         |           |           |
| PC-3                              | 0.559     | 2.292                                 | 2.292                  | 2.186 | 2.018 | 0.949 | 0.732          | 100            | 94            | 84   | 22   | 10   | 3.58E-6 | > 1.00E-4 | > 1.00E-4 |
| DU-145                            | 0.359     | 1.606                                 | 1.632                  | 1.615 | 1.629 | 1.127 | 0.584          | 102            | 101           | 102  | 62   | 18   | 1.85E-6 | > 1.00E-4 | > 1.00E-4 |
| <b>Breast Cancer</b>              |           |                                       |                        |       |       |       |                |                |               |      |      |      |         |           |           |
| MCF7                              | 0.625     | 2.551                                 | 2.277                  | 2.336 | 2.348 | 0.979 | 0.602          | 86             | 89            | 89   | 18   | -4   | 3.59E-6 | 6.81E-6   | > 1.00E-4 |
| MDA-MB-231/ATCC                   | 0.495     | 1.216                                 | 1.190                  | 1.153 | 1.107 | 0.847 | 0.387          | 96             | 91            | 85   | 49   | -22  | 9.29E-6 | 4.91E-6   | > 1.00E-4 |
| HS 578T                           | 0.868     | 2.131                                 | 1.965                  | 2.022 | 2.026 | 1.425 | 0.934          | 87             | 91            | 92   | 44   | 5    | 7.50E-6 | > 1.00E-4 | > 1.00E-4 |
| BT-549                            | 0.079     | 2.355                                 | 2.358                  | 2.394 | 2.378 | 1.703 | 0.916          | 100            | 102           | 102  | 49   | -15  | 9.53E-6 | 5.80E-6   | > 1.00E-4 |
| T-47D                             | 0.750     | 1.843                                 | 1.780                  | 1.725 | 1.751 | 0.952 | 0.705          | 94             | 89            | 92   | 18   | -6   | 3.70E-6 | 5.68E-6   | > 1.00E-4 |
| MDA-MB-468                        | 0.959     | 1.988                                 | 1.921                  | 1.965 | 1.923 | 1.291 | 0.850          | 93             | 98            | 94   | 32   | -11  | 5.15E-6 | 5.48E-6   | > 1.00E-4 |

Figure 147. In-vitro five dose testing results for compound 12d

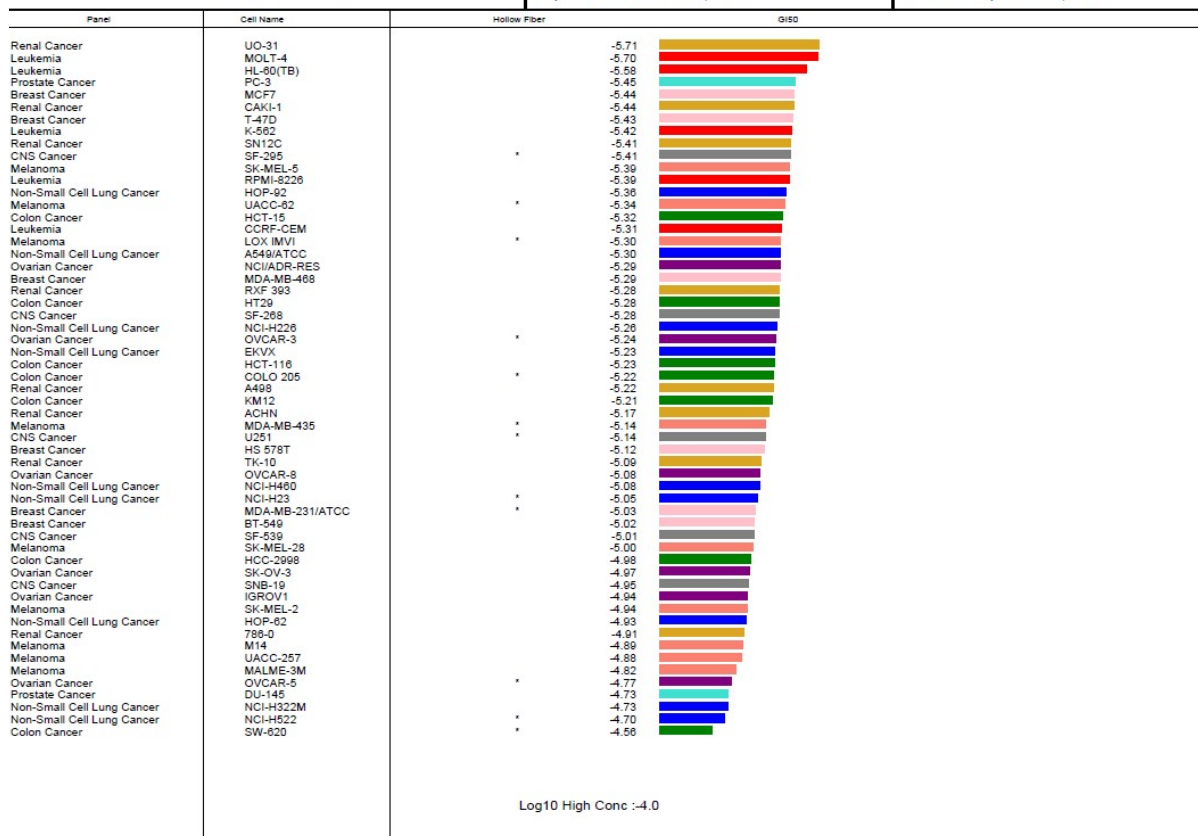

Figure 148. IC<sub>50</sub> values depicted in the waterfall graph for compound 12d

***In-vitro* anti-cancer activity against NCI 60 cell line panel – five dose study and NCI COMPARE. (Compound 12f)**

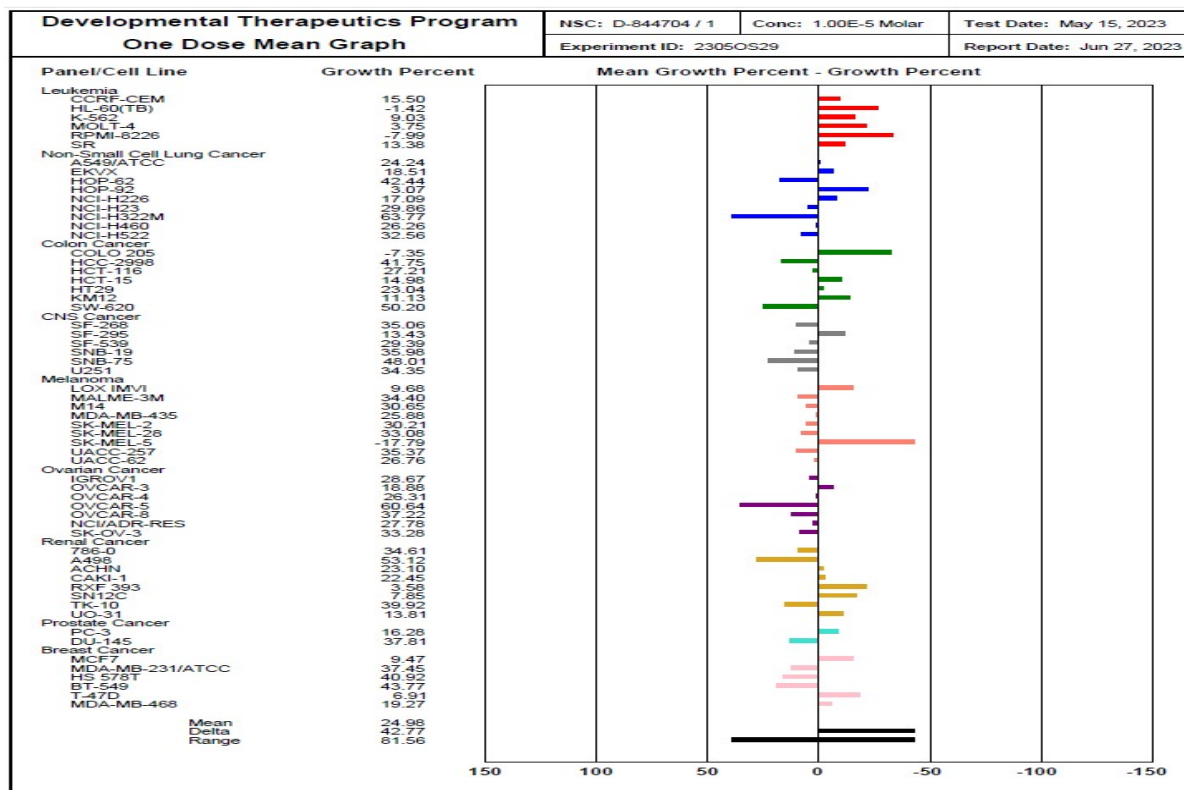

Figure 149. NCI report for growth inhibitory activity of sample 12f at 10µM concentration

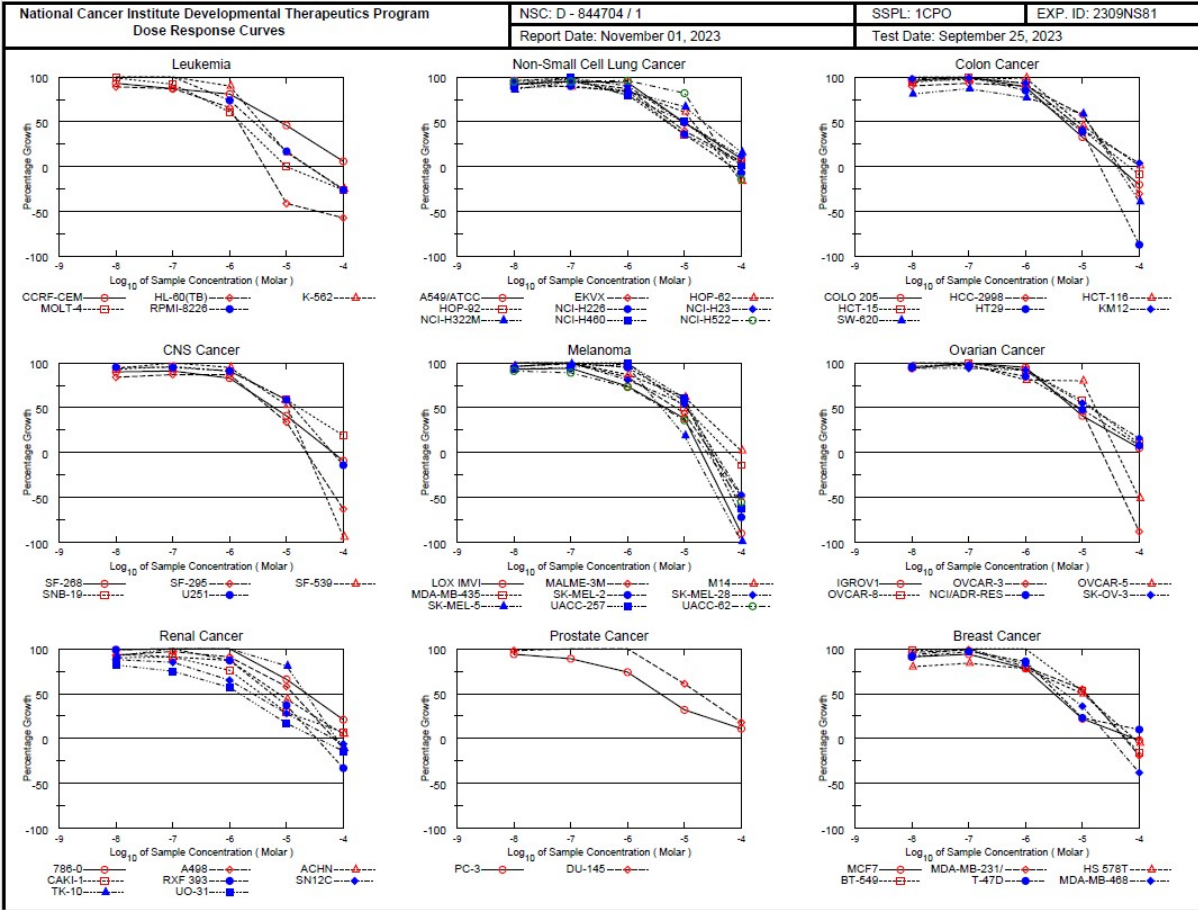

Figure 150. Dose response curves for compound **12f** in individual cell lines

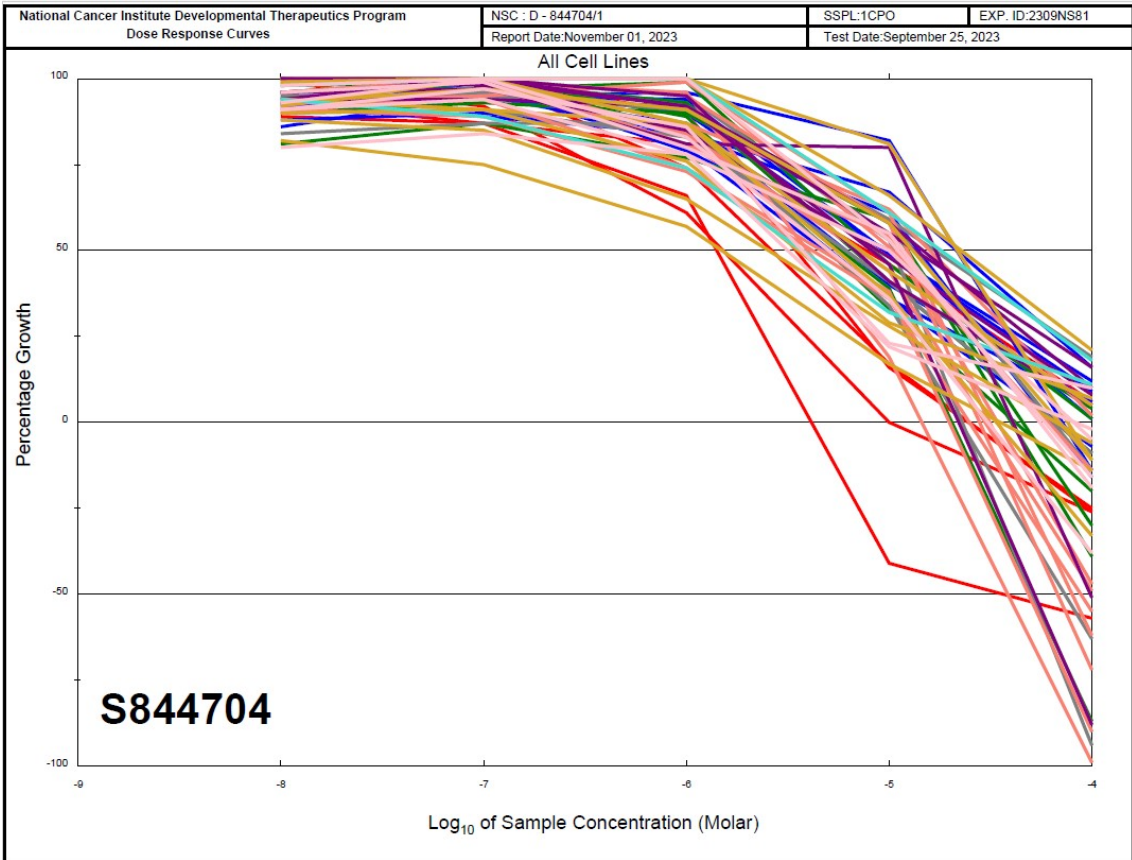

Figure 151. Dose response curves for compound **12f** in all cell lines

**National Cancer Institute Developmental Therapeutics Program  
In-Vitro Testing Results**

| NSC : D - 844704 / 1              |           | Experiment ID : 2309NS81              |                     |       |       |       | Test Type : 08 |                |      |      |      | Units : Molar |         |           |           |  |
|-----------------------------------|-----------|---------------------------------------|---------------------|-------|-------|-------|----------------|----------------|------|------|------|---------------|---------|-----------|-----------|--|
| Report Date : November 01, 2023   |           | Test Date : September 25, 2023        |                     |       |       |       | QNS :          |                |      |      |      | MC :          |         |           |           |  |
| COMI : 040                        |           | Stain Reagent : SRB Dual-Pass Related |                     |       |       |       | SSPL : 1CPO    |                |      |      |      |               |         |           |           |  |
| Panel/Cell Line                   | Time Zero | Ctrl                                  | Log10 Concentration |       |       |       |                | Percent Growth |      |      |      |               | GI50    | TGI       | LC50      |  |
|                                   |           |                                       | -8.0                | -7.0  | -6.0  | -5.0  | -4.0           | -8.0           | -7.0 | -6.0 | -5.0 | -4.0          |         |           |           |  |
| <b>Leukemia</b>                   |           |                                       |                     |       |       |       |                |                |      |      |      |               |         |           |           |  |
| CCRF-CEM                          | 0.494     | 2.711                                 | 2.549               | 2.426 | 2.296 | 1.504 | 0.817          | 93             | 87   | 81   | 46   | 6             | 7.50E-6 | > 1.00E-4 | > 1.00E-4 |  |
| HL-60(TB)                         | 0.589     | 2.595                                 | 2.379               | 2.343 | 1.904 | 0.346 | 0.256          | 89             | 87   | 66   | -41  | -57           | 1.40E-6 | 4.10E-6   | 3.71E-5   |  |
| K-562                             | 0.236     | 2.385                                 | 2.423               | 2.463 | 2.177 | 0.574 | 0.178          | 102            | 104  | 90   | 16   | -25           | 3.47E-6 | 2.45E-6   | > 1.00E-4 |  |
| MOLT-4                            | 0.508     | 2.453                                 | 2.435               | 2.298 | 1.688 | 0.514 | 0.376          | 99             | 92   | 61   | 0    | -26           | 1.50E-6 | 1.03E-6   | > 1.00E-4 |  |
| RPMI-8226                         | 0.797     | 2.574                                 | 2.644               | 2.597 | 2.115 | 1.105 | 0.568          | 104            | 101  | 74   | 17   | -26           | 2.66E-6 | 2.50E-6   | > 1.00E-4 |  |
| <b>Non-Small Cell Lung Cancer</b> |           |                                       |                     |       |       |       |                |                |      |      |      |               |         |           |           |  |
| A549/ATCC                         | 0.421     | 2.275                                 | 2.130               | 2.184 | 2.156 | 1.325 | 0.580          | 92             | 95   | 94   | 49   | 9             | 9.37E-6 | > 1.00E-4 | > 1.00E-4 |  |
| EKVX                              | 0.945     | 2.313                                 | 2.207               | 2.248 | 2.137 | 1.496 | 1.029          | 92             | 95   | 87   | 40   | 6             | 6.20E-6 | > 1.00E-4 | > 1.00E-4 |  |
| HOP-82                            | 0.538     | 1.897                                 | 1.806               | 1.751 | 1.680 | 1.365 | 0.454          | 93             | 89   | 84   | 61   | -16           | 1.38E-6 | 6.23E-6   | > 1.00E-4 |  |
| HOP-92                            | 0.834     | 1.663                                 | 1.627               | 1.639 | 1.494 | 1.136 | 0.877          | 96             | 97   | 80   | 36   | 5             | 4.83E-6 | > 1.00E-4 | > 1.00E-4 |  |
| NCI-H226                          | 1.201     | 2.405                                 | 2.263               | 2.290 | 2.214 | 1.631 | 1.119          | 88             | 90   | 84   | 36   | -7            | 5.06E-6 | 6.89E-6   | > 1.00E-4 |  |
| NCI-H23                           | 0.595     | 2.105                                 | 2.051               | 2.093 | 1.950 | 1.342 | 0.770          | 96             | 99   | 90   | 49   | 12            | 9.71E-6 | > 1.00E-4 | > 1.00E-4 |  |
| NCI-H322M                         | 0.916     | 2.504                                 | 2.284               | 2.429 | 2.247 | 1.987 | 1.163          | 86             | 95   | 84   | 67   | 16            | 2.17E-5 | > 1.00E-4 | > 1.00E-4 |  |
| NCI-H460                          | 0.288     | 2.502                                 | 2.293               | 2.482 | 2.046 | 1.399 | 0.301          | 91             | 99   | 79   | 50   | 1             | 1.01E-5 | > 1.00E-4 | > 1.00E-4 |  |
| NCI-H522                          | 2.068     | 3.366                                 | 3.299               | 3.300 | 3.310 | 3.138 | 1.780          | 95             | 95   | 96   | 82   | -14           | 2.17E-5 | 7.17E-5   | > 1.00E-4 |  |
| <b>Colon Cancer</b>               |           |                                       |                     |       |       |       |                |                |      |      |      |               |         |           |           |  |
| COLO 205                          | 0.645     | 2.793                                 | 2.716               | 2.790 | 2.549 | 1.348 | 0.514          | 96             | 100  | 89   | 33   | -20           | 4.91E-6 | 4.14E-6   | > 1.00E-4 |  |
| HCC-2998                          | 0.669     | 2.596                                 | 2.412               | 2.461 | 2.397 | 1.793 | 0.485          | 90             | 93   | 90   | 58   | -30           | 1.24E-5 | 4.54E-6   | > 1.00E-4 |  |
| HCT-116                           | 0.251     | 2.392                                 | 2.312               | 2.318 | 2.369 | 1.238 | 0.268          | 96             | 97   | 99   | 46   | 1             | 8.43E-6 | > 1.00E-4 | > 1.00E-4 |  |
| HCT-15                            | 0.409     | 2.729                                 | 2.594               | 2.708 | 2.577 | 1.361 | 0.374          | 94             | 99   | 93   | 41   | -9            | 6.74E-6 | 6.72E-6   | > 1.00E-4 |  |
| HT29                              | 0.402     | 2.496                                 | 2.506               | 2.492 | 2.178 | 1.213 | 0.053          | 100            | 100  | 85   | 39   | -87           | 5.69E-6 | 2.03E-6   | 5.09E-5   |  |
| KM12                              | 0.767     | 3.292                                 | 3.245               | 3.262 | 3.104 | 1.800 | 0.858          | 98             | 99   | 93   | 41   | 4             | 6.66E-6 | > 1.00E-4 | > 1.00E-4 |  |
| SW-620                            | 0.336     | 2.077                                 | 1.740               | 1.851 | 1.680 | 1.366 | 0.204          | 81             | 87   | 77   | 59   | -39           | 1.24E-5 | 3.99E-6   | > 1.00E-4 |  |
| <b>CNS Cancer</b>                 |           |                                       |                     |       |       |       |                |                |      |      |      |               |         |           |           |  |
| SF-268                            | 0.793     | 2.323                                 | 2.172               | 2.186 | 2.062 | 1.425 | 0.719          | 90             | 91   | 83   | 41   | -9            | 6.18E-6 | 6.54E-6   | > 1.00E-4 |  |
| SF-295                            | 0.734     | 2.356                                 | 2.098               | 2.152 | 2.145 | 1.293 | 0.270          | 84             | 87   | 87   | 34   | -63           | 5.08E-6 | 2.25E-6   | 7.31E-5   |  |
| SF-539                            | 0.969     | 2.877                                 | 2.762               | 2.917 | 2.777 | 1.979 | 0.054          | 94             | 102  | 95   | 53   | -94           | 1.05E-5 | 2.29E-6   | 4.99E-6   |  |
| SNB-19                            | 0.809     | 2.083                                 | 1.975               | 2.021 | 1.946 | 1.486 | 0.889          | 93             | 96   | 91   | 59   | 19            | 1.72E-5 | > 1.00E-4 | > 1.00E-4 |  |
| U251                              | 0.390     | 1.770                                 | 1.701               | 1.708 | 1.641 | 1.203 | 0.337          | 95             | 95   | 91   | 59   | -14           | 1.33E-5 | 6.49E-6   | > 1.00E-4 |  |
| <b>Melanoma</b>                   |           |                                       |                     |       |       |       |                |                |      |      |      |               |         |           |           |  |
| LOX IMVI                          | 0.390     | 2.451                                 | 2.300               | 2.321 | 1.921 | 1.183 | 0.038          | 93             | 94   | 74   | 38   | -90           | 4.76E-6 | 1.99E-6   | 4.87E-5   |  |
| MALME-3M                          | 0.698     | 1.406                                 | 1.376               | 1.430 | 1.294 | 1.007 | 0.356          | 96             | 103  | 84   | 44   | -49           | 6.88E-6 | 2.96E-6   | > 1.00E-4 |  |
| M14                               | 0.488     | 1.921                                 | 1.859               | 1.932 | 1.742 | 1.370 | 0.510          | 96             | 101  | 87   | 62   | 2             | 1.56E-5 | > 1.00E-4 | > 1.00E-4 |  |
| MDA-MB-435                        | 0.589     | 2.263                                 | 2.292               | 2.397 | 2.269 | 1.440 | 0.505          | 102            | 108  | 100  | 51   | -14           | 1.03E-5 | 6.02E-6   | > 1.00E-4 |  |
| SK-MEL-2                          | 1.482     | 2.843                                 | 2.843               | 2.837 | 2.773 | 2.269 | 0.413          | 100            | 100  | 95   | 58   | -72           | 1.15E-5 | 2.79E-6   | 6.76E-5   |  |
| SK-MEL-28                         | 0.408     | 1.596                                 | 1.679               | 1.672 | 1.372 | 1.048 | 0.216          | 107            | 106  | 81   | 54   | -47           | 1.09E-5 | 3.42E-6   | > 1.00E-4 |  |
| SK-MEL-5                          | 1.218     | 3.352                                 | 3.266               | 3.325 | 3.265 | 1.624 | 0.018          | 96             | 99   | 96   | 19   | -99           | 3.96E-6 | 1.45E-6   | 3.86E-5   |  |
| UACC-257                          | 1.356     | 2.814                                 | 2.713               | 2.742 | 2.796 | 2.253 | 0.521          | 93             | 95   | 99   | 61   | -62           | 1.24E-5 | 3.16E-6   | 8.05E-5   |  |
| UACC-62                           | 0.888     | 2.918                                 | 2.738               | 2.702 | 2.373 | 1.623 | 0.400          | 91             | 89   | 73   | 36   | -55           | 4.24E-6 | 2.50E-6   | 8.82E-5   |  |
| <b>Ovarian Cancer</b>             |           |                                       |                     |       |       |       |                |                |      |      |      |               |         |           |           |  |
| IGROV1                            | 0.805     | 2.364                                 | 2.276               | 2.371 | 2.285 | 1.448 | 0.880          | 94             | 100  | 95   | 41   | 5             | 6.87E-6 | > 1.00E-4 | > 1.00E-4 |  |
| OVCA3                             | 0.583     | 1.998                                 | 1.893               | 1.935 | 1.791 | 1.189 | 0.070          | 100            | 103  | 82   | 46   | -88           | 8.21E-6 | 2.21E-6   | 5.21E-5   |  |
| OVCA5                             | 0.675     | 1.788                                 | 1.822               | 1.747 | 1.584 | 1.553 | 0.333          | 105            | 98   | 81   | 80   | -51           | 1.70E-5 | 4.10E-6   | 9.87E-5   |  |
| OVCA8                             | 0.556     | 2.546                                 | 2.546               | 2.517 | 2.380 | 1.707 | 0.752          | 96             | 99   | 92   | 58   | 10            | 1.48E-5 | > 1.00E-4 | > 1.00E-4 |  |
| NCI/ADR-RES                       | 0.477     | 1.717                                 | 1.665               | 1.683 | 1.528 | 1.072 | 0.575          | 96             | 97   | 85   | 48   | 8             | 8.81E-6 | > 1.00E-4 | > 1.00E-4 |  |
| SK-OV-3                           | 0.834     | 1.968                                 | 1.896               | 1.896 | 1.875 | 1.462 | 1.021          | 94             | 94   | 82   | 55   | 16            | 1.38E-5 | > 1.00E-4 | > 1.00E-4 |  |
| <b>Renal Cancer</b>               |           |                                       |                     |       |       |       |                |                |      |      |      |               |         |           |           |  |
| 786-0                             | 0.639     | 2.818                                 | 2.788               | 2.871 | 2.819 | 2.082 | 1.088          | 99             | 102  | 100  | 66   | 21            | 2.26E-5 | > 1.00E-4 | > 1.00E-4 |  |
| A498                              | 1.292     | 2.272                                 | 2.204               | 2.245 | 2.183 | 1.865 | 1.144          | 93             | 97   | 91   | 58   | -11           | 1.32E-5 | 6.86E-6   | > 1.00E-4 |  |
| ACHN                              | 0.288     | 1.502                                 | 1.429               | 1.390 | 1.342 | 0.818 | 0.349          | 94             | 91   | 87   | 44   | 5             | 7.14E-6 | > 1.00E-4 | > 1.00E-4 |  |
| CAKI-1                            | 0.803     | 2.530                                 | 2.329               | 2.350 | 2.064 | 1.170 | 0.730          | 90             | 91   | 76   | 29   | 7             | 3.60E-6 | > 1.00E-4 | > 1.00E-4 |  |
| RFX 393                           | 0.815     | 1.570                                 | 1.564               | 1.607 | 1.469 | 1.097 | 0.545          | 99             | 105  | 87   | 37   | -33           | 5.52E-6 | 3.38E-6   | > 1.00E-4 |  |
| SN12C                             | 0.457     | 2.002                                 | 1.823               | 1.768 | 1.465 | 0.884 | 0.431          | 88             | 85   | 65   | 28   | -6            | 2.54E-6 | 6.75E-6   | > 1.00E-4 |  |
| TK-10                             | 1.329     | 2.137                                 | 2.071               | 2.194 | 2.458 | 1.981 | 1.177          | 92             | 107  | 140  | 81   | -11           | 2.15E-5 | 7.51E-6   | > 1.00E-4 |  |
| UO-31                             | 0.668     | 2.105                                 | 1.844               | 1.752 | 1.482 | 0.916 | 0.576          | 82             | 75   | 57   | 17   | -14           | 1.47E-6 | 3.58E-6   | > 1.00E-4 |  |
| <b>Prostate Cancer</b>            |           |                                       |                     |       |       |       |                |                |      |      |      |               |         |           |           |  |
| PC-3                              | 0.559     | 2.292                                 | 2.192               | 2.110 | 1.846 | 1.121 | 0.754          | 94             | 89   | 74   | 32   | 11            | 3.80E-6 | > 1.00E-4 | > 1.00E-4 |  |
| DU-145                            | 0.359     | 1.806                                 | 1.581               | 1.662 | 1.643 | 1.124 | 0.586          | 98             | 105  | 103  | 61   | 18            | 1.83E-5 | > 1.00E-4 | > 1.00E-4 |  |
| <b>Breast Cancer</b>              |           |                                       |                     |       |       |       |                |                |      |      |      |               |         |           |           |  |
| MCF7                              | 0.625     | 2.551                                 | 2.376               | 2.429 | 2.129 | 1.051 | 0.615          | 91             | 94   | 78   | 22   | -2            | 3.18E-6 | 8.50E-6   | > 1.00E-4 |  |
| MDA-MB-231/ATCC                   | 0.495     | 1.216                                 | 1.185               | 1.208 | 1.075 | 0.895 | 0.399          | 96             | 99   | 80   | 55   | -19           | 1.18E-5 | 5.49E-6   | > 1.00E-4 |  |
| HS 578T                           | 0.868     | 2.131                                 | 1.876               | 1.929 | 1.854 | 1.497 | 0.823          | 80             | 84   | 78   | 50   | -5            | 9.80E-6 | 8.03E-6   | > 1.00E-4 |  |
| BT-549                            | 0.079     | 2.355                                 | 2.331               | 2.531 | 2.353 | 1.754 | 0.902          | 98             | 114  | 100  | 53   | -16           | 1.10E-5 | 5.79E-6   | > 1.00E-4 |  |
| T-47D                             | 0.750     | 1.843                                 | 1.745               | 1.810 | 1.689 | 0.997 | 0.863          | 91             | 97   | 86   | 23   | 10            | 3.69E-6 | > 1.00E-4 | > 1.00E-4 |  |
| MDA-MB-468                        | 0.959     | 1.988                                 | 1.917               | 1.991 | 1.816 | 1.326 | 0.593          | 93             | 100  | 83   | 36   | -38           | 4.99E-6 | 3.04E-6   | > 1.00E-4 |  |

Figure 152. In-vitro five dose testing results for compound 12f

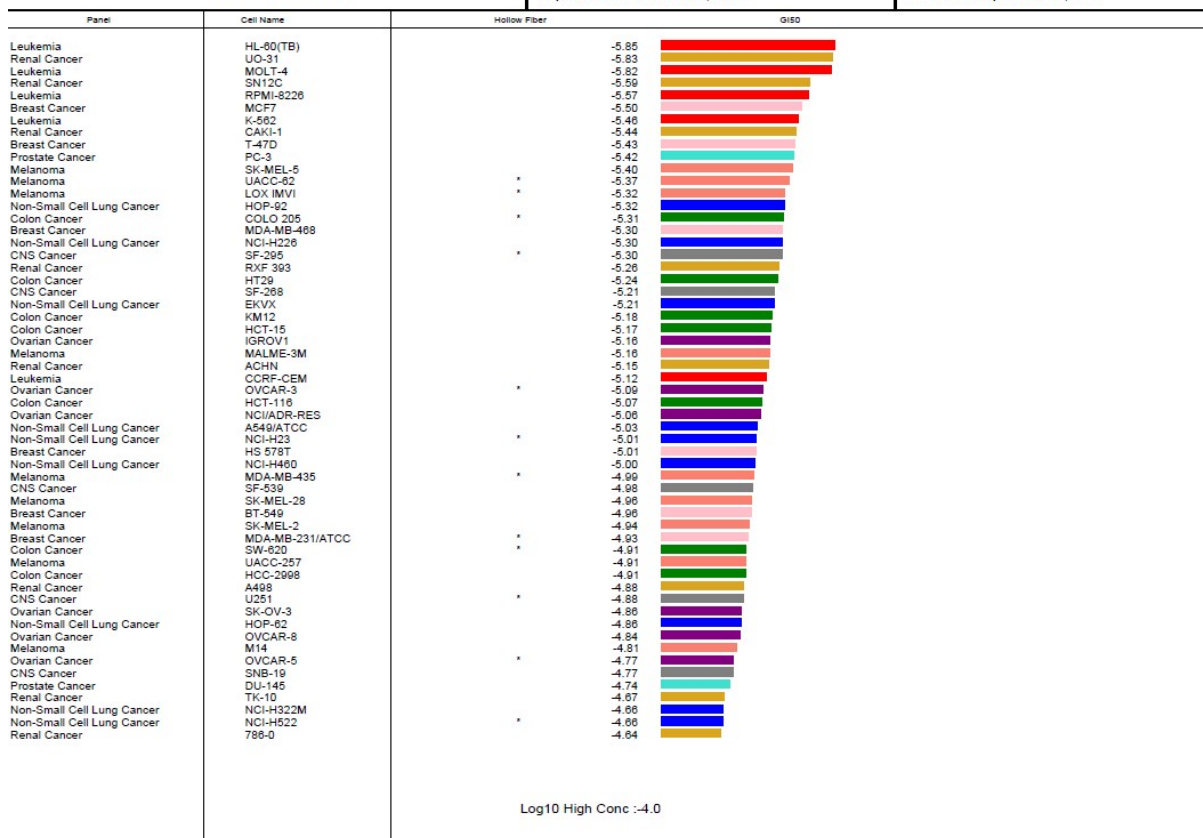

Figure 153. IC<sub>50</sub> values depicted in the waterfall graph for compound 12f

***In-vitro* anti-cancer activity against NCI 60 cell line panel – five dose study and NCI COMPARE. (Compound 12j)**

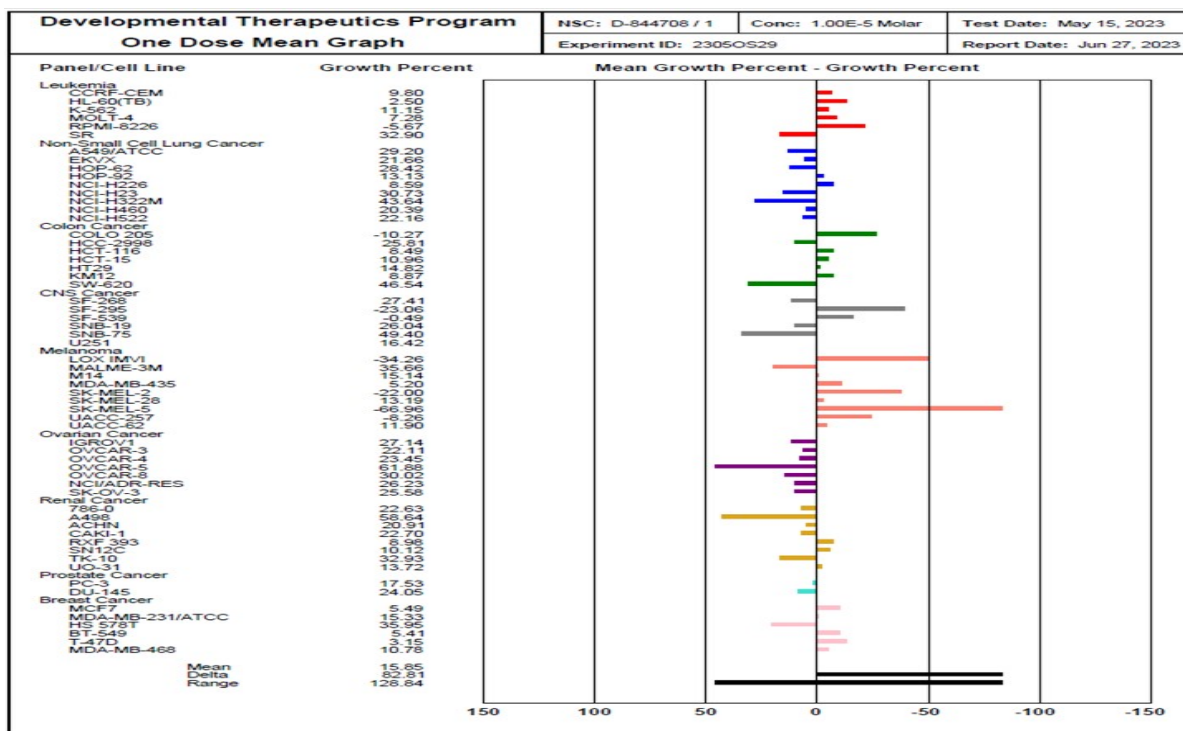

Figure 154. NCI report for growth inhibitory activity of sample 12j at 10µM concentration



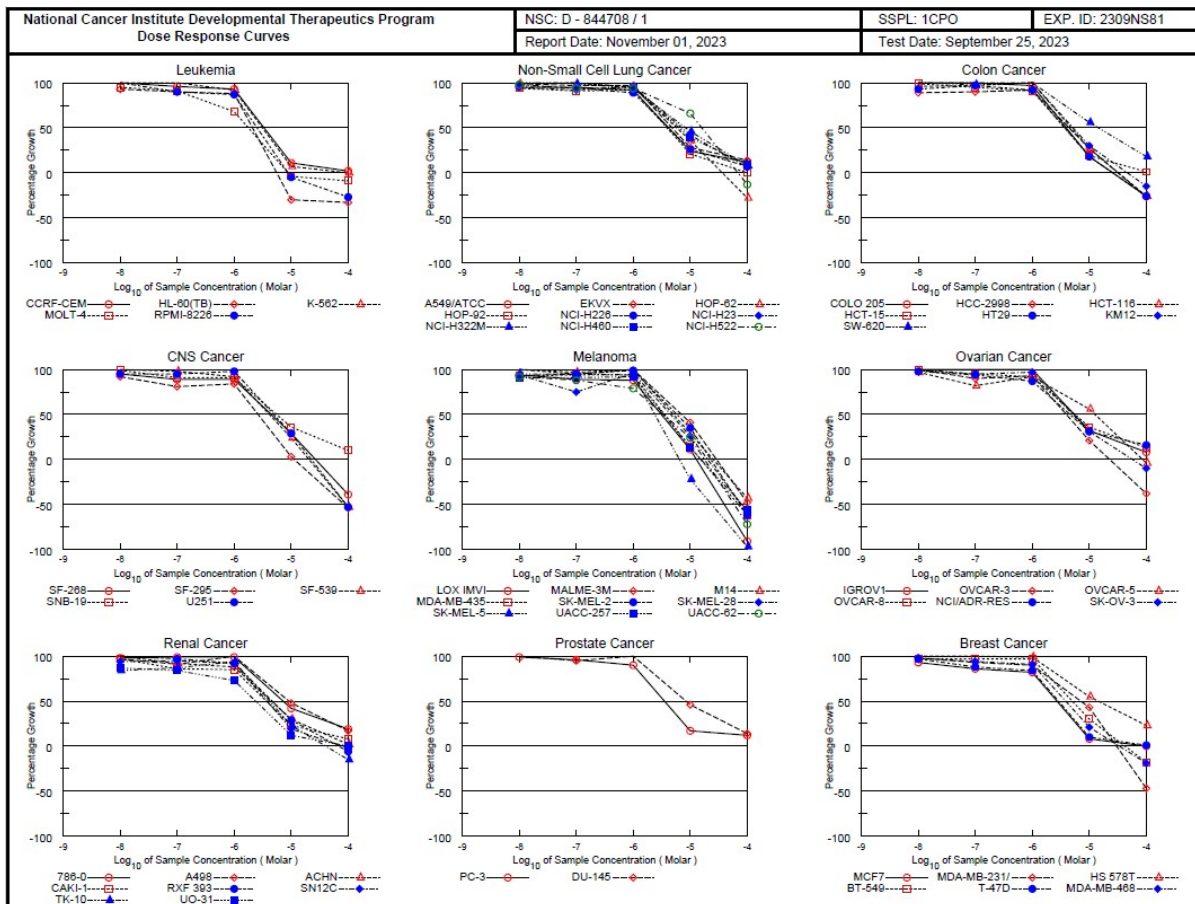

Figure 155. Dose response curves for compound **12j** in individual cell lines

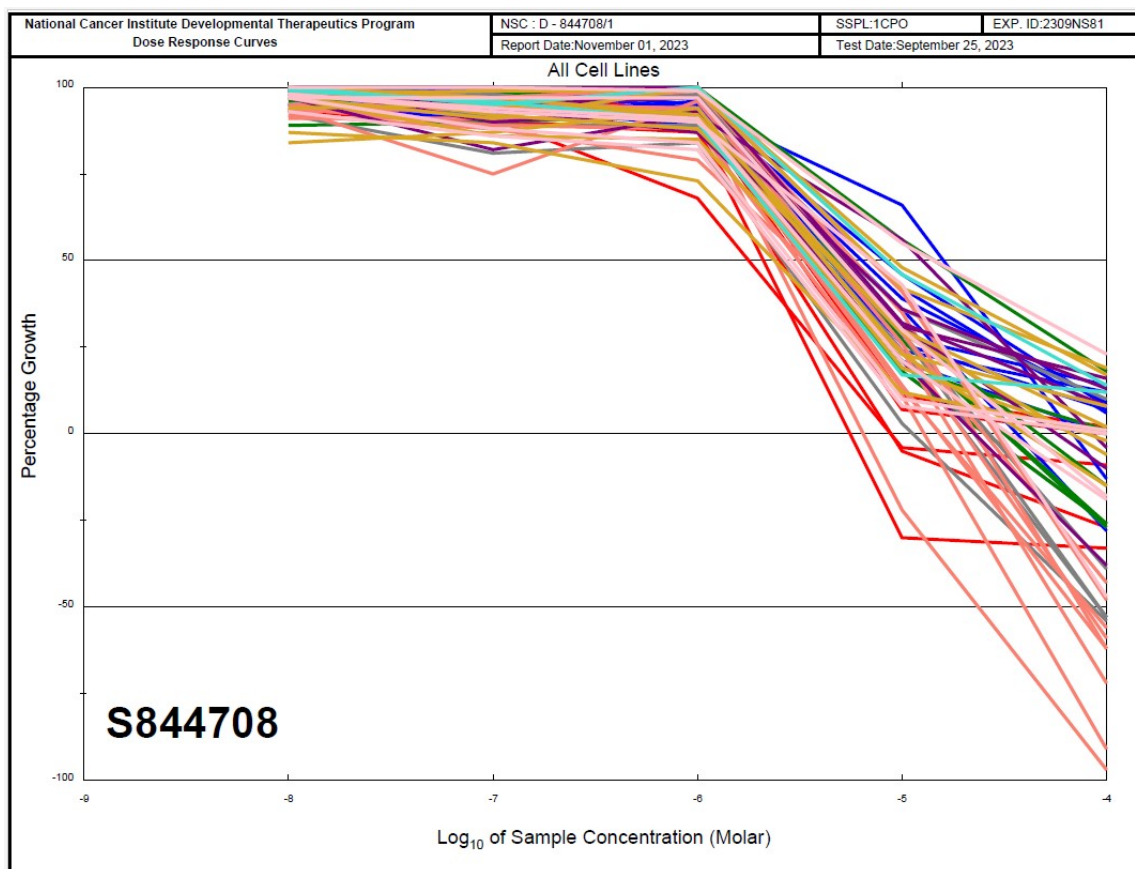

Figure 156. Dose response curves for compound **12j** in all cell lines

**National Cancer Institute Developmental Therapeutics Program  
In-Vitro Testing Results**

| NSC : D - 844708 / 1              |           | Experiment ID : 2309NS81              |       |       |       |       | Test Type : 08 |                | Units : Molar |      |      |      |         |           |           |
|-----------------------------------|-----------|---------------------------------------|-------|-------|-------|-------|----------------|----------------|---------------|------|------|------|---------|-----------|-----------|
| Report Date : November 01, 2023   |           | Test Date : September 25, 2023        |       |       |       |       | QNS :          |                | MC :          |      |      |      |         |           |           |
| COMI : 044                        |           | Stain Reagent : SRB Dual-Pass Related |       |       |       |       | SSPL : 1CPO    |                |               |      |      |      |         |           |           |
| Panel/Cell Line                   | Time Zero | Log10 Concentration                   |       |       |       |       |                | Percent Growth |               |      |      | GI50 | TGI     | LC50      |           |
|                                   |           | Ctrl                                  | -8.0  | -7.0  | -6.0  | -5.0  | -4.0           | -8.0           | -7.0          | -6.0 | -5.0 |      |         |           | -4.0      |
| <b>Leukemia</b>                   |           |                                       |       |       |       |       |                |                |               |      |      |      |         |           |           |
| CCRF-CEM                          | 0.494     | 2.709                                 | 2.725 | 2.610 | 2.547 | 0.730 | 0.531          | 101            | 96            | 93   | 11   | 2    | 3.31E-6 | > 1.00E-4 | > 1.00E-4 |
| HL-60(TB)                         | 0.589     | 2.620                                 | 2.471 | 2.415 | 2.376 | 0.411 | 0.394          | 93             | 90            | 88   | -30  | -33  | 2.10E-6 | 5.55E-6   | > 1.00E-4 |
| K-562                             | 0.236     | 2.277                                 | 2.340 | 2.308 | 2.117 | 0.373 | 0.238          | 103            | 101           | 92   | 7    | 0    | 3.11E-6 | > 1.00E-4 | > 1.00E-4 |
| MOLT-4                            | 0.508     | 2.611                                 | 2.508 | 2.413 | 1.946 | 0.490 | 0.461          | 95             | 91            | 88   | -4   | -9   | 1.80E-6 | 8.93E-6   | > 1.00E-4 |
| RPMI-8226                         | 0.797     | 2.610                                 | 2.633 | 2.428 | 2.381 | 0.755 | 0.584          | 101            | 90            | 87   | -5   | -27  | 2.53E-6 | 8.76E-6   | > 1.00E-4 |
| <b>Non-Small Cell Lung Cancer</b> |           |                                       |       |       |       |       |                |                |               |      |      |      |         |           |           |
| A549/ATCC                         | 0.421     | 2.352                                 | 2.252 | 2.265 | 2.205 | 0.881 | 0.645          | 95             | 95            | 92   | 24   | 12   | 4.15E-6 | > 1.00E-4 | > 1.00E-4 |
| EKVX                              | 0.945     | 2.328                                 | 2.319 | 2.293 | 2.282 | 1.335 | 1.142          | 99             | 97            | 97   | 28   | 14   | 4.80E-6 | > 1.00E-4 | > 1.00E-4 |
| HOP-62                            | 0.538     | 1.908                                 | 1.889 | 1.951 | 1.837 | 1.037 | 0.390          | 99             | 103           | 95   | 36   | -28  | 5.85E-6 | 3.71E-6   | > 1.00E-4 |
| HOP-92                            | 0.834     | 1.612                                 | 1.565 | 1.539 | 1.551 | 0.998 | 0.827          | 94             | 91            | 92   | 21   | 0    | 3.91E-6 | 9.10E-6   | > 1.00E-4 |
| NCI-H226                          | 1.201     | 2.411                                 | 2.371 | 2.340 | 2.273 | 1.519 | 1.290          | 97             | 94            | 89   | 26   | 7    | 4.16E-6 | > 1.00E-4 | > 1.00E-4 |
| NCI-H23                           | 0.595     | 2.080                                 | 2.012 | 1.964 | 2.020 | 1.226 | 0.686          | 95             | 92            | 96   | 42   | 6    | 7.23E-6 | > 1.00E-4 | > 1.00E-4 |
| NCI-H322M                         | 0.916     | 2.506                                 | 2.505 | 2.491 | 2.410 | 1.652 | 1.037          | 100            | 99            | 94   | 46   | 8    | 8.35E-6 | > 1.00E-4 | > 1.00E-4 |
| NCI-H460                          | 0.288     | 2.644                                 | 2.708 | 2.782 | 2.522 | 1.214 | 0.493          | 103            | 106           | 95   | 39   | 9    | 6.41E-6 | > 1.00E-4 | > 1.00E-4 |
| NCI-H522                          | 2.068     | 3.388                                 | 3.367 | 3.315 | 3.304 | 2.933 | 1.798          | 98             | 94            | 94   | 66   | -13  | 1.58E-5 | 6.52E-5   | > 1.00E-4 |
| <b>Colon Cancer</b>               |           |                                       |       |       |       |       |                |                |               |      |      |      |         |           |           |
| COLO 205                          | 0.645     | 2.754                                 | 2.792 | 2.787 | 2.684 | 1.029 | 0.480          | 102            | 101           | 97   | 18   | -26  | 3.93E-6 | 2.60E-5   | > 1.00E-4 |
| HCC-2998                          | 0.669     | 2.643                                 | 2.427 | 2.452 | 2.490 | 1.196 | 0.488          | 89             | 90            | 92   | 27   | -27  | 4.41E-6 | 3.13E-5   | > 1.00E-4 |
| HCT-116                           | 0.251     | 2.422                                 | 2.343 | 2.367 | 2.466 | 0.846 | 0.185          | 96             | 97            | 102  | 27   | -26  | 4.98E-6 | 3.22E-5   | > 1.00E-4 |
| HCT-15                            | 0.409     | 2.779                                 | 2.748 | 2.665 | 2.562 | 0.857 | 0.445          | 99             | 95            | 91   | 19   | 1    | 3.70E-6 | > 1.00E-4 | > 1.00E-4 |
| HT29                              | 0.402     | 2.541                                 | 2.381 | 2.467 | 2.365 | 0.781 | 0.296          | 93             | 97            | 92   | 18   | -26  | 3.66E-6 | 2.51E-5   | > 1.00E-4 |
| KM12                              | 0.767     | 3.254                                 | 3.306 | 3.249 | 3.273 | 1.525 | 0.650          | 102            | 100           | 101  | 30   | -15  | 5.27E-6 | 4.64E-5   | > 1.00E-4 |
| SW-620                            | 0.336     | 2.042                                 | 2.136 | 2.010 | 2.189 | 1.291 | 0.637          | 106            | 98            | 109  | 56   | 18   | 1.43E-5 | > 1.00E-4 | > 1.00E-4 |
| <b>CNS Cancer</b>                 |           |                                       |       |       |       |       |                |                |               |      |      |      |         |           |           |
| SF-268                            | 0.793     | 2.277                                 | 2.205 | 2.110 | 2.109 | 1.230 | 0.481          | 95             | 89            | 89   | 29   | -39  | 4.49E-6 | 2.68E-5   | > 1.00E-4 |
| SF-295                            | 0.734     | 2.481                                 | 2.344 | 2.147 | 2.204 | 0.792 | 0.339          | 92             | 81            | 84   | 3    | -54  | 2.65E-6 | 1.14E-5   | 8.57E-5   |
| SF-539                            | 0.969     | 2.670                                 | 2.745 | 2.631 | 2.533 | 1.383 | 0.459          | 104            | 98            | 92   | 24   | -53  | 4.17E-6 | 2.07E-5   | 9.23E-5   |
| SNB-19                            | 0.809     | 2.164                                 | 2.143 | 2.023 | 2.024 | 1.169 | 0.758          | 99             | 91            | 91   | 36   | 10   | 5.57E-6 | > 1.00E-4 | > 1.00E-4 |
| U251                              | 0.390     | 1.765                                 | 1.702 | 1.697 | 1.733 | 0.789 | 0.183          | 95             | 95            | 98   | 29   | -53  | 4.95E-6 | 2.25E-5   | 9.14E-5   |
| <b>Melanoma</b>                   |           |                                       |       |       |       |       |                |                |               |      |      |      |         |           |           |
| LOX IMVI                          | 0.390     | 2.408                                 | 2.292 | 2.190 | 2.161 | 0.611 | 0.036          | 94             | 89            | 88   | 11   | -91  | 3.10E-6 | 1.28E-5   | 3.97E-5   |
| MALME-3M                          | 0.698     | 1.425                                 | 1.374 | 1.392 | 1.462 | 0.993 | 0.361          | 93             | 95            | 105  | 41   | -48  | 7.13E-6 | 2.86E-5   | > 1.00E-4 |
| M14                               | 0.488     | 1.935                                 | 1.930 | 1.891 | 1.972 | 0.902 | 0.276          | 100            | 97            | 103  | 29   | -43  | 5.14E-6 | 2.49E-5   | > 1.00E-4 |
| MDA-MB-435                        | 0.589     | 2.346                                 | 2.230 | 2.243 | 2.235 | 0.835 | 0.225          | 93             | 94            | 94   | 14   | -62  | 3.53E-6 | 1.53E-5   | 6.99E-5   |
| SK-MEL-2                          | 1.482     | 2.874                                 | 2.873 | 2.809 | 2.858 | 1.969 | 0.571          | 100            | 95            | 99   | 35   | -62  | 5.81E-6 | 2.30E-5   | 7.60E-5   |
| SK-MEL-28                         | 0.408     | 1.441                                 | 1.377 | 1.178 | 1.397 | 0.675 | 0.169          | 94             | 75            | 96   | 26   | -59  | 4.51E-6 | 2.02E-5   | 7.91E-5   |
| SK-MEL-5                          | 1.218     | 3.323                                 | 3.222 | 3.217 | 3.193 | 0.951 | 0.036          | 95             | 95            | 94   | -22  | -97  | 2.39E-6 | 6.46E-6   | 2.36E-5   |
| UACC-257                          | 1.356     | 2.780                                 | 2.646 | 2.652 | 2.664 | 1.548 | 0.599          | 91             | 91            | 92   | 13   | -56  | 3.42E-6 | 1.56E-5   | 8.24E-5   |
| UACC-62                           | 0.888     | 2.966                                 | 2.792 | 2.720 | 2.524 | 1.390 | 0.249          | 92             | 88            | 79   | 24   | -72  | 3.36E-6 | 1.78E-5   | 5.91E-5   |
| <b>Ovarian Cancer</b>             |           |                                       |       |       |       |       |                |                |               |      |      |      |         |           |           |
| IGROV1                            | 0.905     | 2.519                                 | 2.556 | 2.564 | 2.604 | 1.351 | 0.949          | 102            | 103           | 105  | 32   | 8    | 5.64E-6 | > 1.00E-4 | > 1.00E-4 |
| OVCA9-3                           | 0.583     | 1.890                                 | 1.915 | 1.754 | 1.795 | 0.859 | 0.382          | 102            | 90            | 93   | 21   | -38  | 3.95E-6 | 2.28E-5   | > 1.00E-4 |
| OVCA9-5                           | 0.675     | 1.571                                 | 1.541 | 1.407 | 1.495 | 1.173 | 0.650          | 97             | 82            | 82   | 56   | -4   | 1.24E-5 | 8.66E-5   | > 1.00E-4 |
| OVCA9-8                           | 0.556     | 2.563                                 | 2.542 | 2.455 | 2.408 | 1.277 | 0.809          | 99             | 95            | 92   | 36   | 13   | 5.62E-6 | > 1.00E-4 | > 1.00E-4 |
| NCI/ADR-RES                       | 0.477     | 1.708                                 | 1.885 | 1.829 | 1.563 | 0.852 | 0.673          | 98             | 94            | 87   | 31   | 16   | 4.55E-6 | > 1.00E-4 | > 1.00E-4 |
| SK-OV-3                           | 0.834     | 1.938                                 | 1.935 | 1.881 | 1.900 | 1.179 | 0.750          | 100            | 95            | 97   | 31   | -10  | 5.16E-6 | 5.71E-5   | > 1.00E-4 |
| <b>Renal Cancer</b>               |           |                                       |       |       |       |       |                |                |               |      |      |      |         |           |           |
| 786-0                             | 0.639     | 2.852                                 | 2.798 | 2.823 | 2.828 | 1.573 | 1.057          | 98             | 99            | 99   | 42   | 19   | 7.29E-6 | > 1.00E-4 | > 1.00E-4 |
| A498                              | 1.292     | 2.242                                 | 2.211 | 2.157 | 2.316 | 1.747 | 1.456          | 97             | 91            | 108  | 48   | 17   | 9.21E-6 | > 1.00E-4 | > 1.00E-4 |
| ACHN                              | 0.288     | 1.374                                 | 1.408 | 1.290 | 1.246 | 0.618 | 0.309          | 103            | 92            | 88   | 30   | 2    | 4.58E-6 | > 1.00E-4 | > 1.00E-4 |
| CAKI-1                            | 0.803     | 2.459                                 | 2.399 | 2.206 | 2.175 | 1.025 | 0.750          | 97             | 86            | 85   | 23   | 8    | 3.63E-6 | > 1.00E-4 | > 1.00E-4 |
| RXF 393                           | 0.815     | 1.577                                 | 1.603 | 1.554 | 1.514 | 1.033 | 0.765          | 103            | 97            | 92   | 29   | -6   | 4.59E-6 | 6.64E-5   | > 1.00E-4 |
| SN12C                             | 0.457     | 2.074                                 | 1.984 | 1.990 | 1.941 | 0.771 | 0.447          | 94             | 95            | 92   | 19   | -2   | 3.78E-6 | 7.84E-5   | > 1.00E-4 |
| TK-10                             | 1.329     | 2.169                                 | 2.039 | 2.056 | 2.117 | 1.520 | 1.128          | 84             | 87            | 94   | 23   | -15  | 4.13E-6 | 3.98E-5   | > 1.00E-4 |
| UO-31                             | 0.668     | 2.149                                 | 1.960 | 1.910 | 1.747 | 0.850 | 0.671          | 87             | 84            | 73   | 12   | 0    | 2.38E-6 | > 1.00E-4 | > 1.00E-4 |
| <b>Prostate Cancer</b>            |           |                                       |       |       |       |       |                |                |               |      |      |      |         |           |           |
| PC-3                              | 0.559     | 2.258                                 | 2.243 | 2.183 | 2.080 | 0.947 | 0.762          | 99             | 96            | 90   | 17   | 12   | 3.50E-6 | > 1.00E-4 | > 1.00E-4 |
| DU-145                            | 0.359     | 1.639                                 | 1.689 | 1.581 | 1.664 | 0.946 | 0.543          | 104            | 95            | 102  | 46   | 14   | 8.43E-6 | > 1.00E-4 | > 1.00E-4 |
| <b>Breast Cancer</b>              |           |                                       |       |       |       |       |                |                |               |      |      |      |         |           |           |
| MCF7                              | 0.625     | 2.614                                 | 2.474 | 2.339 | 2.258 | 0.783 | 0.619          | 93             | 86            | 82   | 8    | 0    | 2.71E-6 | 7.80E-5   | > 1.00E-4 |
| MDA-MB-231/ATCC                   | 0.495     | 1.176                                 | 1.162 | 1.127 | 1.106 | 0.790 | 0.263          | 98             | 93            | 90   | 43   | -47  | 7.15E-6 | 3.01E-5   | > 1.00E-4 |
| HS 578T                           | 0.868     | 2.112                                 | 2.140 | 2.180 | 2.095 | 1.551 | 1.148          | 102            | 105           | 99   | 55   | 23   | 1.42E-5 | > 1.00E-4 | > 1.00E-4 |
| BT-549                            | 1.079     | 2.435                                 | 2.389 | 2.392 | 2.401 | 1.481 | 0.881          | 97             | 97            | 97   | 30   | -18  | 5.01E-6 | 4.14E-5   | > 1.00E-4 |
| T-47D                             | 0.750     | 1.964                                 | 1.930 | 1.820 | 1.767 | 0.867 | 0.759          | 97             | 88            | 84   | 10   | 1    | 2.85E-6 | > 1.00E-4 | > 1.00E-4 |
| MDA-MB-468                        | 0.959     | 2.002                                 | 1.977 | 1.942 | 1.912 | 1.176 | 0.774          | 98             | 94            | 91   | 21   | -19  | 3.86E-6 | 3.30E-5   | > 1.00E-4 |

Figure 157. In-vitro five dose testing results for compound 12j

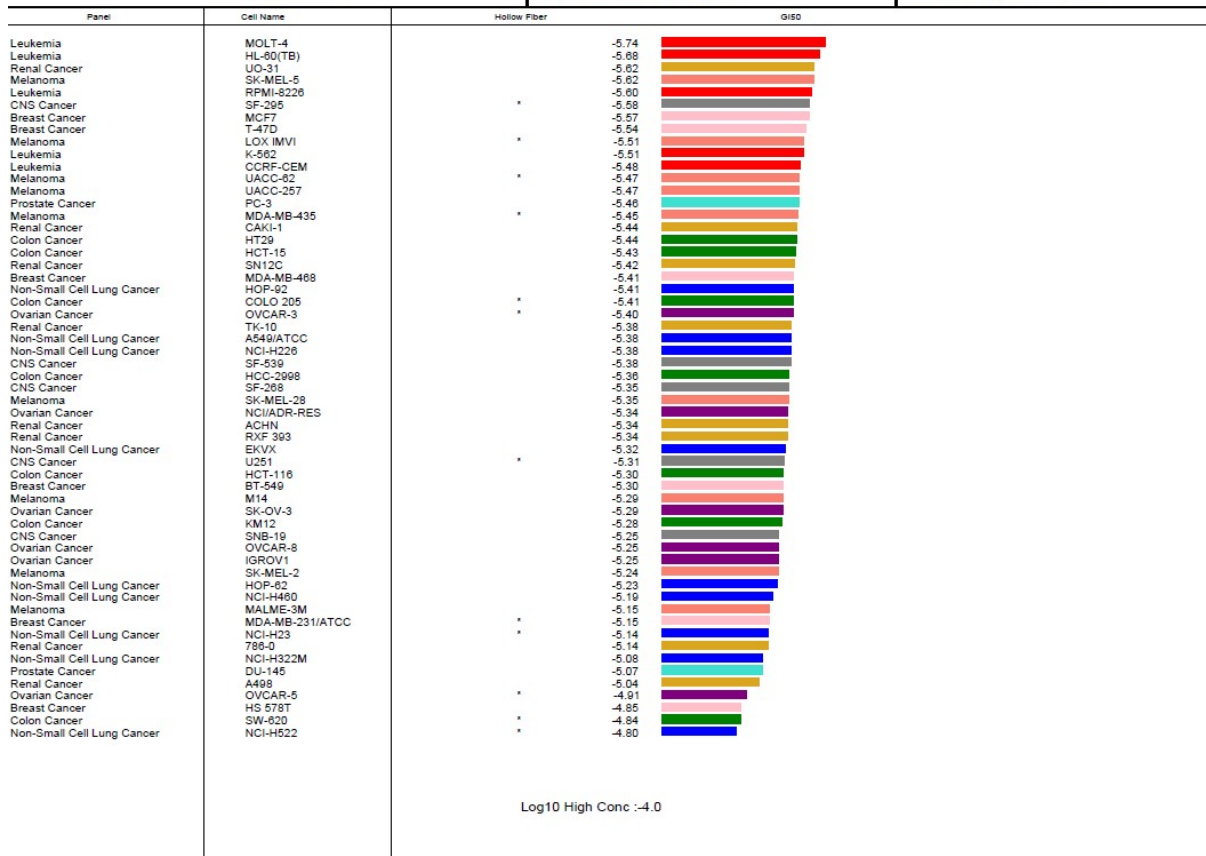

Figure 158. IC<sub>50</sub> values depicted in the waterfall graph for compound 12j

***In-vitro* anti-cancer activity against NCI 60 cell line panel – single dose and five dose study and NCI COMPARE. (Compound 11)**

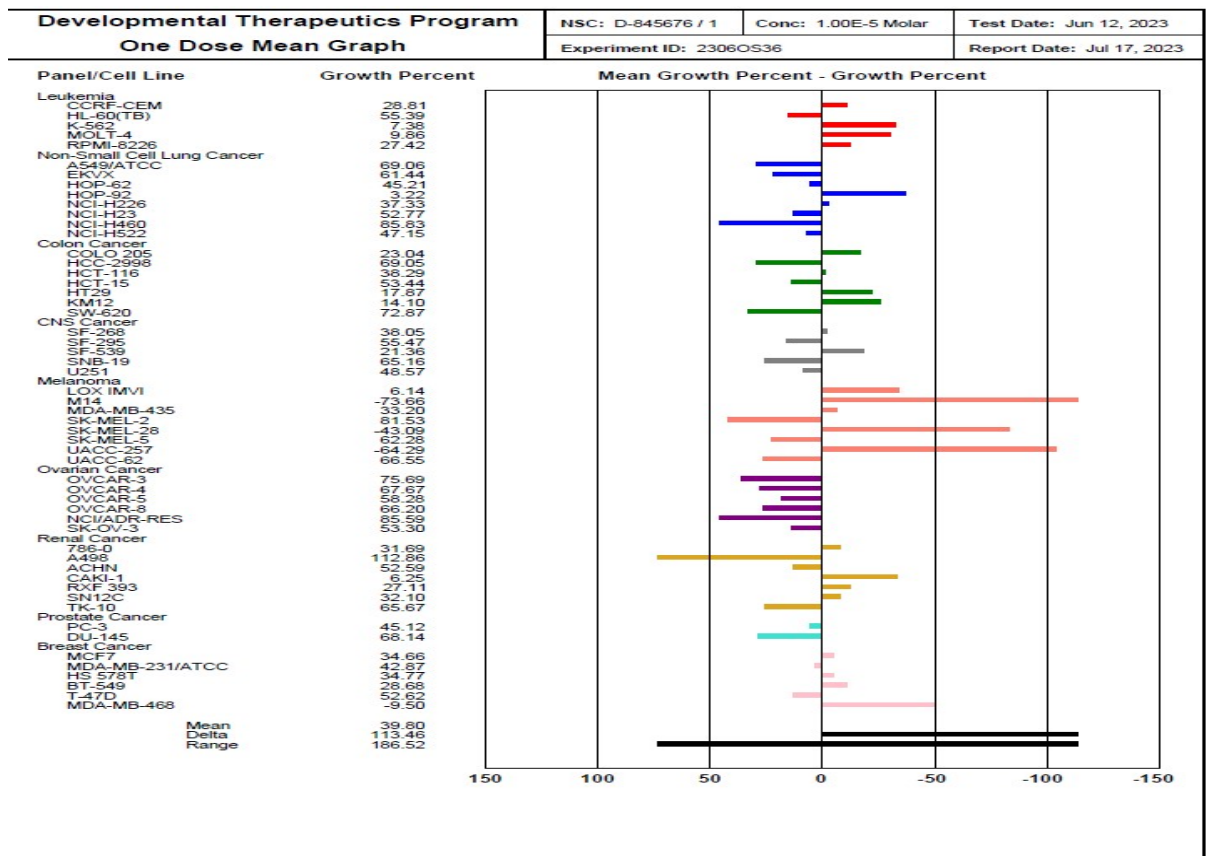

Figure 159. NCI report for growth inhibitory activity of sample 11 at 10µM concentration

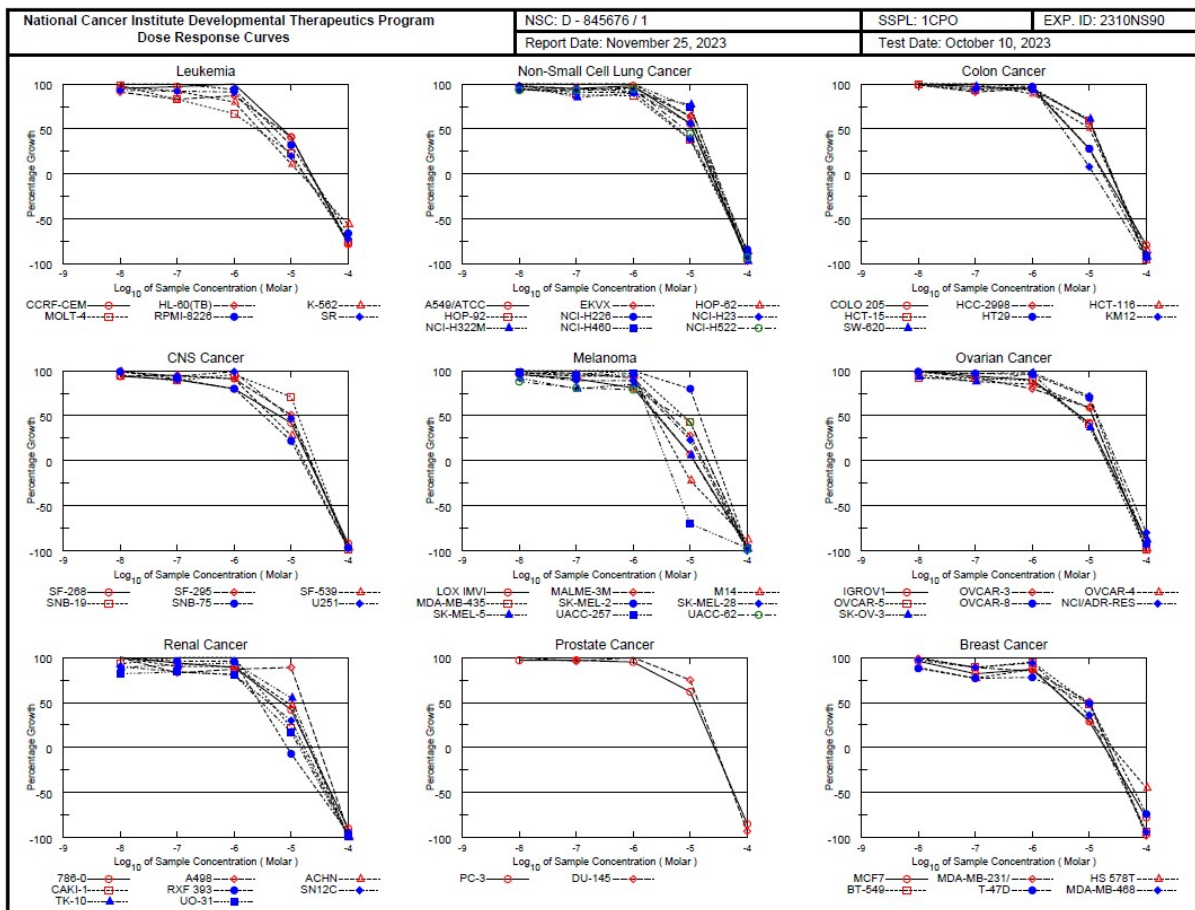

Figure 160. Dose response curves for compound **11** in individual cell lines

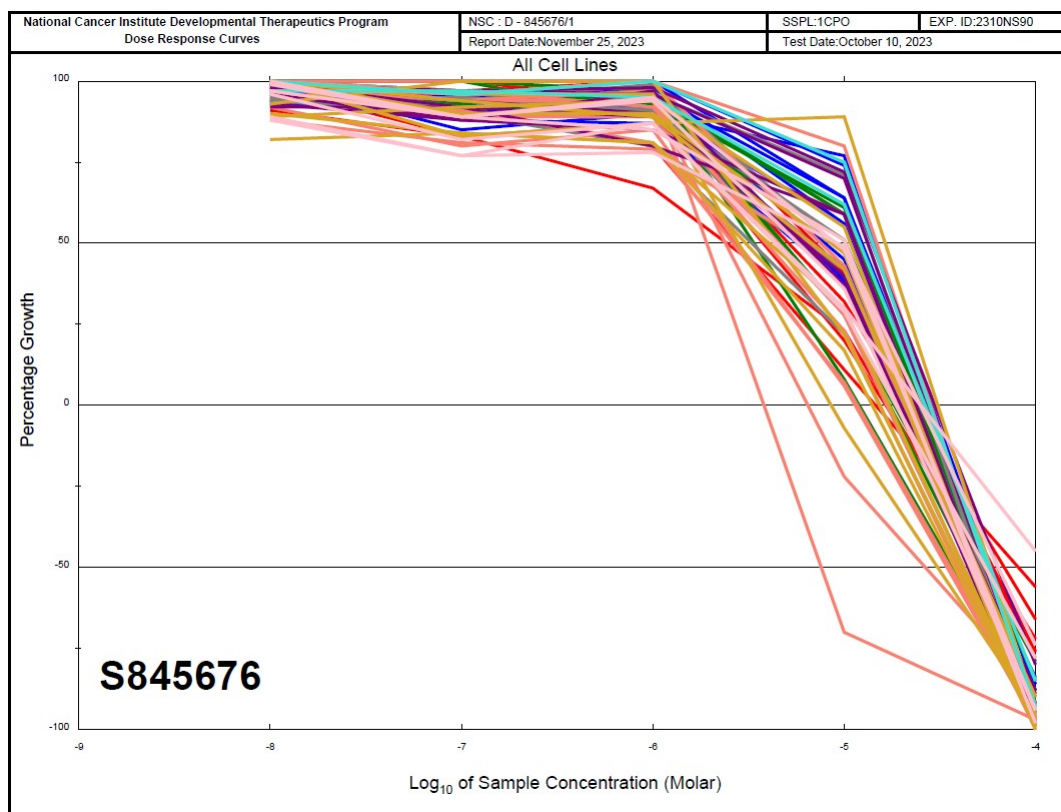

Figure 161. Dose response curves for compound **11** in all cell lines

**National Cancer Institute Developmental Therapeutics Program  
In-Vitro Testing Results**

| NSC : D - 845676 / 1              |           | Experiment ID : 2310NS90              |                     |       |       |       |        | Test Type : 08 |      |      |      | Units : Molar |         |         |           |  |
|-----------------------------------|-----------|---------------------------------------|---------------------|-------|-------|-------|--------|----------------|------|------|------|---------------|---------|---------|-----------|--|
| Report Date : November 25, 2023   |           | Test Date : October 10, 2023          |                     |       |       |       |        | QNS :          |      |      |      | MC :          |         |         |           |  |
| COMI : AND-052                    |           | Stain Reagent : SRB Dual-Pass Related |                     |       |       |       |        | SSPL : 1CPO    |      |      |      |               |         |         |           |  |
| Panel/Cell Line                   | Time Zero | Ctrl                                  | Log10 Concentration |       |       |       |        | Percent Growth |      |      |      |               | GI50    | TGI     | LC50      |  |
|                                   |           |                                       | -8.0                | -7.0  | -6.0  | -5.0  | -4.0   | -8.0           | -7.0 | -6.0 | -5.0 | -4.0          |         |         |           |  |
| <b>Leukemia</b>                   |           |                                       |                     |       |       |       |        |                |      |      |      |               |         |         |           |  |
| CCRF-CEM                          | 0.316     | 1.413                                 | 1.363               | 1.385 | 1.415 | 0.770 | 0.070  | 95             | 97   | 100  | 41   | -78           | 7.14E-6 | 2.22E-5 | 5.83E-5   |  |
| HL-60(TB)                         | 0.474     | 2.095                                 | 1.952               | 1.826 | 1.879 | 1.133 | 0.114  | 91             | 83   | 87   | 41   | -76           | 6.25E-6 | 2.23E-5 | 5.98E-5   |  |
| K-562                             | 0.135     | 1.088                                 | 1.062               | 1.013 | 0.900 | 0.239 | 0.059  | 97             | 92   | 80   | 11   | -56           | 2.74E-6 | 1.45E-5 | 8.06E-5   |  |
| MOLT-4                            | 0.532     | 2.420                                 | 2.389               | 2.108 | 1.799 | 0.974 | 0.127  | 98             | 83   | 67   | 23   | -76           | 2.47E-6 | 1.72E-5 | 5.46E-5   |  |
| RPMI-8226                         | 0.801     | 2.417                                 | 2.515               | 2.429 | 2.312 | 1.310 | 0.271  | 106            | 101  | 94   | 32   | -66           | 5.03E-6 | 2.10E-5 | 6.83E-5   |  |
| SR                                | 0.510     | 2.230                                 | 2.103               | 2.085 | 2.079 | 0.855 | 0.144  | 93             | 92   | 91   | 20   | -72           | 3.80E-6 | 1.65E-5 | 5.79E-5   |  |
| <b>Non-Small Cell Lung Cancer</b> |           |                                       |                     |       |       |       |        |                |      |      |      |               |         |         |           |  |
| A549/ATCC                         | 0.316     | 1.800                                 | 1.563               | 1.541 | 1.572 | 1.035 | 0.015  | 97             | 95   | 98   | 56   | -95           | 1.10E-5 | 2.34E-5 | 5.01E-5   |  |
| EKVX                              | 0.746     | 2.027                                 | 1.950               | 1.952 | 1.980 | 1.563 | 0.019  | 94             | 94   | 96   | 64   | -97           | 1.22E-5 | 2.49E-5 | 5.08E-5   |  |
| HOP-62                            | 0.472     | 1.410                                 | 1.507               | 1.477 | 1.457 | 1.076 | 0.065  | 110            | 107  | 105  | 64   | -86           | 1.25E-5 | 2.68E-5 | 5.75E-5   |  |
| HOP-92                            | 1.030     | 1.793                                 | 1.758               | 1.702 | 1.697 | 1.318 | 0.108  | 95             | 88   | 87   | 38   | -90           | 5.65E-6 | 1.98E-5 | 4.89E-5   |  |
| NCI-H226                          | 1.191     | 2.425                                 | 2.351               | 2.317 | 2.314 | 1.670 | 0.192  | 94             | 91   | 91   | 39   | -84           | 6.10E-6 | 2.07E-5 | 5.29E-5   |  |
| NCI-H23                           | 0.671     | 2.122                                 | 2.094               | 2.048 | 2.006 | 1.482 | 0.051  | 98             | 85   | 92   | 56   | -92           | 1.10E-5 | 2.38E-5 | 5.17E-5   |  |
| NCI-H322M                         | 0.838     | 2.251                                 | 2.255               | 2.042 | 2.115 | 1.924 | 0.026  | 100            | 85   | 90   | 77   | -97           | 1.43E-5 | 2.77E-5 | 5.37E-5   |  |
| NCI-H460                          | 0.323     | 1.880                                 | 2.089               | 1.943 | 1.956 | 1.474 | 0.040  | 113            | 104  | 105  | 74   | -88           | 1.41E-5 | 2.96E-5 | 5.84E-5   |  |
| NCI-H522                          | 0.964     | 2.471                                 | 2.372               | 2.364 | 2.390 | 1.648 | 0.071  | 93             | 93   | 95   | 45   | -93           | 8.05E-6 | 2.13E-5 | 4.91E-5   |  |
| <b>Colon Cancer</b>               |           |                                       |                     |       |       |       |        |                |      |      |      |               |         |         |           |  |
| COLO 205                          | 0.530     | 1.773                                 | 1.829               | 1.738 | 1.715 | 0.880 | 0.111  | 105            | 97   | 95   | 28   | -79           | 4.72E-6 | 1.83E-5 | 5.39E-5   |  |
| HCC-2998                          | 1.184     | 3.148                                 | 3.123               | 2.866 | 3.056 | 2.329 | 0.070  | 99             | 91   | 95   | 59   | -94           | 1.14E-5 | 2.42E-5 | 5.15E-5   |  |
| HCT-116                           | 0.194     | 2.196                                 | 2.232               | 2.205 | 1.991 | 1.216 | 0.030  | 102            | 100  | 89   | 51   | -85           | 1.02E-5 | 2.38E-5 | 5.56E-5   |  |
| HCT-15                            | 0.361     | 2.341                                 | 2.313               | 2.210 | 2.261 | 1.525 | 0.020  | 99             | 93   | 96   | 59   | -95           | 1.14E-5 | 2.42E-5 | 5.12E-5   |  |
| HT29                              | 0.203     | 1.072                                 | 1.070               | 1.154 | 1.042 | 0.446 | 0.020  | 100            | 109  | 97   | 28   | -90           | 4.77E-6 | 1.72E-5 | 4.57E-5   |  |
| KM12                              | 0.662     | 1.985                                 | 2.373               | 1.901 | 1.950 | 0.788 | 0.042  | 129            | 94   | 97   | 8    | -94           | 3.39E-6 | 1.20E-5 | 3.72E-5   |  |
| SW-620                            | 0.309     | 1.387                                 | 1.405               | 1.352 | 1.316 | 0.962 | 0.025  | 102            | 97   | 93   | 61   | -92           | 1.17E-5 | 2.49E-5 | 5.30E-5   |  |
| <b>CNS Cancer</b>                 |           |                                       |                     |       |       |       |        |                |      |      |      |               |         |         |           |  |
| SF-268                            | 0.932     | 2.356                                 | 2.266               | 2.209 | 2.070 | 1.532 | 0.075  | 94             | 90   | 80   | 42   | -92           | 6.18E-6 | 2.06E-5 | 4.86E-5   |  |
| SF-295                            | 1.028     | 2.880                                 | 2.774               | 2.794 | 2.712 | 1.975 | 0.034  | 94             | 95   | 91   | 51   | -97           | 1.02E-5 | 2.22E-5 | 4.83E-5   |  |
| SF-539                            | 0.944     | 2.347                                 | 2.329               | 2.262 | 2.217 | 1.335 | 0.025  | 99             | 94   | 91   | 28   | -97           | 4.45E-6 | 1.67E-5 | 4.19E-5   |  |
| SNB-19                            | 0.787     | 2.067                                 | 2.003               | 1.924 | 2.019 | 1.695 | 0.004  | 95             | 89   | 96   | 71   | -99           | 1.33E-5 | 2.61E-5 | 5.12E-5   |  |
| SNB-75                            | 1.063     | 1.693                                 | 1.687               | 1.637 | 1.564 | 1.199 | 0.034  | 99             | 91   | 80   | 22   | -97           | 3.23E-6 | 1.52E-5 | 4.02E-5   |  |
| U251                              | 0.232     | 1.171                                 | 1.163               | 1.118 | 1.158 | 0.677 | 0.010  | 99             | 94   | 99   | 47   | -96           | 8.88E-6 | 2.14E-5 | 4.78E-5   |  |
| <b>Melanoma</b>                   |           |                                       |                     |       |       |       |        |                |      |      |      |               |         |         |           |  |
| LOX IMVI                          | 0.425     | 2.123                                 | 2.060               | 1.966 | 1.795 | 0.539 | 0.017  | 96             | 91   | 81   | 7    | -96           | 2.60E-6 | 1.16E-5 | 3.59E-5   |  |
| MALME-3M                          | 0.650     | 1.432                                 | 1.532               | 1.407 | 1.370 | 0.872 | 0.022  | 113            | 97   | 92   | 28   | -97           | 4.58E-6 | 1.69E-5 | 4.23E-5   |  |
| M14                               | 0.408     | 1.522                                 | 1.497               | 1.454 | 1.400 | 0.319 | 0.051  | 95             | 94   | 94   | -22  | -88           | 2.41E-6 | 6.49E-6 | 2.89E-5   |  |
| MDA-MB-435                        | 0.636     | 1.914                                 | 2.277               | 2.043 | 1.977 | 1.185 | 0.020  | 128            | 110  | 105  | 43   | -97           | 7.69E-6 | 4.62E-6 | 4.62E-5   |  |
| SK-MEL-2                          | 1.172     | 2.290                                 | 2.266               | 2.250 | 2.312 | 2.062 | 0.041  | 98             | 96   | 102  | 80   | -97           | 1.47E-5 | 2.83E-5 | 5.44E-5   |  |
| SK-MEL-28                         | 0.683     | 2.002                                 | 1.952               | 1.853 | 1.862 | 0.990 | 0.002  | 96             | 89   | 89   | 23   | -100          | 3.89E-6 | 1.53E-5 | 3.92E-5   |  |
| SK-MEL-5                          | 1.062     | 2.954                                 | 2.794               | 2.569 | 2.677 | 1.169 | 0.018  | 92             | 80   | 85   | 6    | -98           | 2.78E-6 | 1.13E-5 | 3.43E-5   |  |
| UAACC-257                         | 1.151     | 2.565                                 | 2.539               | 2.479 | 2.518 | 0.348 | 0.031  | 98             | 94   | 97   | -70  | -97           | 1.91E-6 | 3.81E-6 | 7.61E-6   |  |
| UAACC-62                          | 0.704     | 2.232                                 | 2.046               | 1.944 | 1.915 | 1.365 | 0.016  | 88             | 81   | 79   | 43   | -98           | 6.49E-6 | 2.03E-5 | 4.58E-5   |  |
| <b>Ovarian Cancer</b>             |           |                                       |                     |       |       |       |        |                |      |      |      |               |         |         |           |  |
| IGROV1                            | 0.591     | 1.992                                 | 2.063               | 1.909 | 1.852 | 1.180 | 0.066  | 105            | 94   | 90   | 42   | -89           | 6.81E-6 | 2.09E-5 | 5.04E-5   |  |
| OVCAR-3                           | 0.858     | 2.212                                 | 2.195               | 2.110 | 1.947 | 1.659 | 0.017  | 99             | 92   | 80   | 59   | -98           | 1.14E-5 | 2.38E-5 | 4.95E-5   |  |
| OVCAR-4                           | 0.794     | 1.976                                 | 1.926               | 1.828 | 1.794 | 1.497 | 0.019  | 96             | 88   | 85   | 59   | -98           | 1.15E-5 | 2.39E-5 | 4.98E-5   |  |
| OVCAR-5                           | 0.643     | 1.367                                 | 1.309               | 1.312 | 1.285 | 0.929 | 0.006  | 92             | 92   | 89   | 40   | -99           | 6.12E-6 | 1.93E-5 | 4.43E-5   |  |
| OVCAR-8                           | 0.495     | 2.142                                 | 2.127               | 2.098 | 2.080 | 1.650 | 0.033  | 99             | 97   | 98   | 70   | -93           | 1.33E-5 | 2.68E-5 | 5.43E-5   |  |
| NCI/ADR-RES                       | 0.372     | 1.264                                 | 1.245               | 1.233 | 1.246 | 1.011 | 0.078  | 98             | 97   | 98   | 72   | -90           | 1.39E-5 | 2.98E-5 | 6.38E-5   |  |
| SK-OV-3                           | 0.624     | 1.547                                 | 1.483               | 1.440 | 1.517 | 0.965 | 0.076  | 93             | 88   | 97   | 37   | -88           | 6.03E-6 | 1.97E-5 | 4.97E-5   |  |
| <b>Renal Cancer</b>               |           |                                       |                     |       |       |       |        |                |      |      |      |               |         |         |           |  |
| 786-0                             | 0.440     | 2.192                                 | 2.221               | 2.093 | 2.008 | 1.169 | 0.044  | 102            | 94   | 89   | 42   | -90           | 6.68E-6 | 2.07E-5 | 4.97E-5   |  |
| A498                              | 1.307     | 2.187                                 | 2.183               | 2.034 | 2.071 | 2.089 | 0.062  | 100            | 83   | 87   | 89   | -93           | 1.64E-5 | 3.08E-5 | 5.80E-5   |  |
| ACHN                              | 0.426     | 1.620                                 | 1.618               | 1.500 | 1.496 | 0.983 | -0.001 | 100            | 90   | 90   | 47   | -100          | 8.34E-6 | 2.08E-5 | 4.56E-5   |  |
| CAKI-1                            | 0.462     | 1.361                                 | 1.302               | 1.601 | 1.524 | 0.658 | 0.013  | 93             | 127  | 118  | 22   | -97           | 5.09E-6 | 1.52E-5 | 4.01E-5   |  |
| RXF 393                           | 1.053     | 1.637                                 | 1.665               | 1.613 | 1.615 | 0.980 | 0.052  | 105            | 96   | 96   | -7   | -95           | 2.80E-6 | 8.56E-6 | 3.08E-5   |  |
| SN12C                             | 0.552     | 2.035                                 | 1.885               | 1.805 | 1.756 | 1.003 | 0.010  | 90             | 84   | 81   | 30   | -98           | 4.11E-6 | 1.72E-5 | 4.22E-5   |  |
| TK-10                             | 0.990     | 2.125                                 | 1.999               | 2.037 | 2.053 | 1.617 | 0.013  | 99             | 92   | 94   | 55   | -99           | 1.08E-5 | 2.28E-5 | 4.83E-5   |  |
| UO-31                             | 0.704     | 1.996                                 | 1.764               | 1.784 | 1.755 | 0.924 | 0.007  | 82             | 84   | 81   | 17   | -99           | 3.07E-6 | 1.40E-5 | 3.78E-5   |  |
| <b>Prostate Cancer</b>            |           |                                       |                     |       |       |       |        |                |      |      |      |               |         |         |           |  |
| PC-3                              | 0.414     | 1.696                                 | 1.664               | 1.653 | 1.637 | 1.207 | 0.063  | 97             | 97   | 95   | 62   | -85           | 1.20E-5 | 2.64E-5 | 5.79E-5   |  |
| DU-145                            | 0.339     | 1.227                                 | 1.229               | 1.189 | 1.240 | 1.001 | 0.025  | 100            | 96   | 101  | 75   | -93           | 1.40E-5 | 2.79E-5 | 5.56E-5   |  |
| <b>Breast Cancer</b>              |           |                                       |                     |       |       |       |        |                |      |      |      |               |         |         |           |  |
| MCF7                              | 0.420     | 1.943                                 | 1.885               | 1.675 | 1.742 | 0.854 | 0.092  | 96             | 82   | 87   | 29   | -78           | 4.28E-6 | 1.85E-5 | 5.44E-5   |  |
| MDA-MB-231/ATCC                   | 0.549     | 1.120                                 | 1.116               | 1.056 | 1.035 | 0.839 | 0.014  | 99             | 89   | 85   | 51   | -98           | 1.01E-5 | 2.20E-5 | 4.78E-5   |  |
| HS 578T                           | 1.661     | 2.743                                 | 2.623               | 2.498 | 2.598 | 1.988 | 0.915  | 89             | 77   | 87   | 30   | -45           | 4.45E-6 | 2.52E-5 | > 1.00E-4 |  |
| BT-549                            | 1.156     | 2.218                                 | 2.233               | 2.105 | 2.160 | 1.664 | 0.065  | 101            | 89   | 95   | 48   | -94           | 8.97E-6 | 2.17E-5 | 4.87E-5   |  |
| T-47D                             | 0.631     | 1.276                                 | 1.199               | 1.127 | 1.133 | 0.948 | 0.167  | 88             | 77   | 78   | 49   | -74           | 9.28E-6 | 2.51E-5 | 6.42E-5   |  |
| MDA-MB-468                        | 1.202     | 1.975                                 | 1.950               | 1.887 | 1.925 | 1.482 | 0.074  | 97             | 89   | 94   | 36   | -94           | 5.75E-6 | 1.90E-5 | 4.60E-5   |  |

Figure 162. In-vitro five dose testing results for compound 11

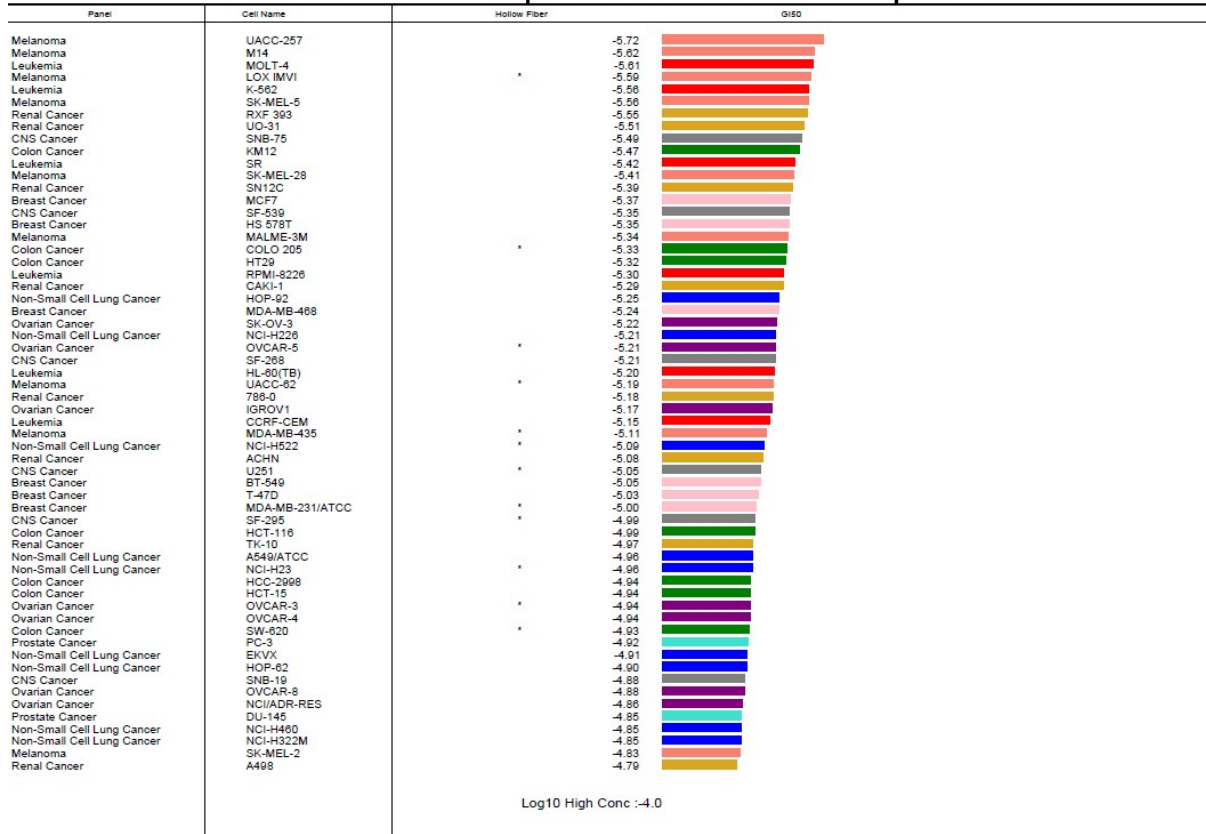

Figure 163. IC<sub>50</sub> values depicted in the waterfall graph for compound 11
